# Supplementary material for: Glycal mediated synthesis of piperidine alkaloids: fagomine, 4-epi-fagomine, 2-deoxynojirimycin, and an advanced intermediate, iminoglycal
Source: Royal Society of Chemistry journal article supplement (doi:10.1039/d2ra05224e), 2022-01-01
Supplement: d2ra05224e1.pdf [file d2ra05224e1.pdf]

## Supporting Information

### Glycal mediated synthesis of piperidine alkaloids: fagomine, 4-*epi*-fagomine, 2-deoxynojirimycin and an advanced intermediate, iminoglycal

Hemender R. Chand<sup>a</sup>, Mrityunjay K. Tiwari<sup>b</sup> and Asish K. Bhattacharya<sup>a\*</sup>

<sup>a</sup> Division of Organic Chemistry, CSIR-National Chemical Laboratory, Dr. Homi Bhabha Road, Pashan, Pune-411008, India

<sup>b</sup> Academy of Scientific and Innovative Research (AcSIR), Ghaziabad, India

<sup>c</sup> Physical and Material Chemistry Division, CSIR-National Chemical Laboratory, Dr. Homi Bhabha Road, Pashan, Pune-411008, India

e-mail: [ak.bhattacharya@ncl.res.in](mailto:ak.bhattacharya@ncl.res.in)

## TABLE OF CONTENTS

| <b>S. No.</b> | <b>Description</b>                                                                     | <b>Page No.</b>    |
|---------------|----------------------------------------------------------------------------------------|--------------------|
| <b>1.</b>     | <b>Table 1</b>                                                                         | <b>S 5</b>         |
| <b>2.</b>     | <b>Table 2</b>                                                                         | <b>S 6</b>         |
| <b>3.</b>     | <b><math>^1\text{H}</math> NMR, <math>^{13}\text{C}</math> and DEPT Spectra of 8a</b>  | <b>S 7- S 9</b>    |
| <b>4.</b>     | <b>ESI-MS and HRMS Spectra of 8a</b>                                                   | <b>S 10 - S 11</b> |
| <b>5.</b>     | <b><math>^1\text{H}</math> NMR, <math>^{13}\text{C}</math> and DEPT Spectra of 8b</b>  | <b>S 12 - S 14</b> |
| <b>6.</b>     | <b>ESI-MS and HRMS Spectra of 8b</b>                                                   | <b>S 15 - S 16</b> |
| <b>7.</b>     | <b><math>^1\text{H}</math> NMR, <math>^{13}\text{C}</math> and DEPT Spectra of 7a</b>  | <b>S 17 - S 19</b> |
| <b>8.</b>     | <b>2-D NMR of 7a</b>                                                                   | <b>S 20 - S 23</b> |
| <b>9.</b>     | <b>ESI-MS and HRMS Spectra of 7a</b>                                                   | <b>S 24 - S 25</b> |
| <b>10.</b>    | <b><math>^1\text{H}</math> NMR, <math>^{13}\text{C}</math> and DEPT Spectra of 7b</b>  | <b>S 26 - S 28</b> |
| <b>11.</b>    | <b>ESI-MS and HRMS Spectra of 7b</b>                                                   | <b>S 29 - S 30</b> |
| <b>12.</b>    | <b><math>^1\text{H}</math> NMR, <math>^{13}\text{C}</math> and DEPT Spectra of 13a</b> | <b>S 31 - S 33</b> |
| <b>13.</b>    | <b>2-D NMR of 13a</b>                                                                  | <b>S 34 - S 38</b> |
| <b>14.</b>    | <b>ESI-MS and HRMS Spectra of 13a</b>                                                  | <b>S 39 - S 40</b> |
| <b>15.</b>    | <b><math>^1\text{H}</math> NMR, <math>^{13}\text{C}</math> and DEPT Spectra of 13b</b> | <b>S 41 - S 43</b> |

|            |                                                                  |                    |
|------------|------------------------------------------------------------------|--------------------|
| <b>16.</b> | <b>2-D NMR of 13b</b>                                            | <b>S 44 - S 48</b> |
| <b>17.</b> | <b>ESI-MS and HRMS Spectra of 13b</b>                            | <b>S 49 - S 50</b> |
| <b>18.</b> | <b><sup>1</sup>H NMR, <sup>13</sup>C and DEPT Spectra of 20a</b> | <b>S 51 - S 53</b> |
| <b>19.</b> | <b>ESI-MS and HRMS Spectra of 20a</b>                            | <b>S 54 - S 55</b> |
| <b>20.</b> | <b><sup>1</sup>H NMR, <sup>13</sup>C and DEPT Spectra of 20b</b> | <b>S 56 - S 58</b> |
| <b>21.</b> | <b>ESI-MS and HRMS Spectra of 20b</b>                            | <b>S 59 - S 60</b> |
| <b>22.</b> | <b><sup>1</sup>H NMR and <sup>13</sup>C Spectra of 21a</b>       | <b>S 61 - S 62</b> |
| <b>23.</b> | <b>ESI-MS and HRMS Spectra of 21a</b>                            | <b>S 63 - S 64</b> |
| <b>24.</b> | <b><sup>1</sup>H NMR and <sup>13</sup>C Spectra of 17a</b>       | <b>S 65 - S 66</b> |
| <b>25.</b> | <b>ESI-MS and HRMS Spectra of 17a</b>                            | <b>S 67 - S 68</b> |
| <b>26.</b> | <b><sup>1</sup>H NMR and <sup>13</sup>C Spectra of 17b</b>       | <b>S 69 - S 70</b> |
| <b>27.</b> | <b>ESI-MS and HRMS Spectra of 17b</b>                            | <b>S 71 - S 72</b> |
| <b>28.</b> | <b><sup>1</sup>H NMR, <sup>13</sup>C and DEPT Spectra of 22</b>  | <b>S 73 - S 75</b> |
| <b>29.</b> | <b>ESI-MS and HRMS Spectra of 22</b>                             | <b>S 76 - S 77</b> |
| <b>30.</b> | <b><sup>1</sup>H NMR, <sup>13</sup>C and DEPT Spectra of 23</b>  | <b>S 78 - S 80</b> |
| <b>31.</b> | <b>ESI-MS and HRMS Spectra of 23</b>                             | <b>S 81 - S 82</b> |
| <b>32.</b> | <b>Computational details</b>                                     | <b>S 83</b>        |
| <b>33.</b> | <b>Table 3</b>                                                   | <b>S 86</b>        |

|            |                                                                                                         |                      |
|------------|---------------------------------------------------------------------------------------------------------|----------------------|
| <b>34.</b> | <b>Table 4</b>                                                                                          | <b>S 87</b>          |
| <b>35.</b> | <b>Table 5</b>                                                                                          | <b>S 88</b>          |
| <b>36.</b> | <b>Figure S1</b>                                                                                        | <b>S 89</b>          |
| <b>37.</b> | <b>Figure S2</b>                                                                                        | <b>S 90</b>          |
| <b>38.</b> | <b>Figure S3</b>                                                                                        | <b>S 91</b>          |
| <b>39.</b> | <b>Figure S4</b>                                                                                        | <b>S 92</b>          |
| <b>40.</b> | <b>XYZ coordinates of the DFT optimized geometries of<br/>2-deoxygluconolactam-<i>N</i>-Boc (20a)</b>   | <b>S 93 - S 113</b>  |
| <b>41.</b> | <b>XYZ coordinates of the DFT optimized geometries of<br/>2-deoxygalactonolactam-<i>N</i>-Boc (20b)</b> | <b>S 113 - S 133</b> |

**Table 1.** Attempt for *N*-protection of 2-deoxyglycolactam.

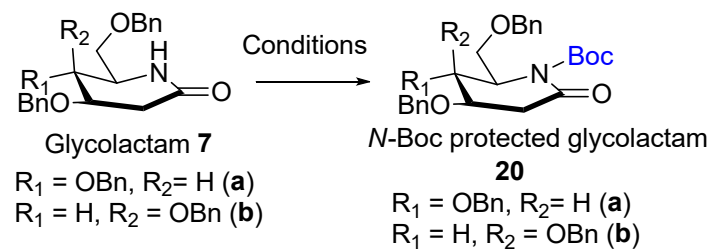

| Entry | Reagents and condition                                                  | Remark                                                                                           |
|-------|-------------------------------------------------------------------------|--------------------------------------------------------------------------------------------------|
| 1     | Boc <sub>2</sub> O, Py, DMAP, rt                                        | Sm recovered                                                                                     |
| 2     | Boc <sub>2</sub> O, NaHCO <sub>3</sub> , H <sub>2</sub> O -THF, rt      | Sm recovered                                                                                     |
| 3     | Boc <sub>2</sub> O, CH <sub>3</sub> CN, NEt <sub>3</sub> , DMAP (cat)   | Sm recovered                                                                                     |
| 4     | Boc <sub>2</sub> O, DCM, NEt <sub>3</sub> , DMAP (cat), 0 °C<br>then rt | <b>2-deoxygluconolactam-N-Boc (20a) 95%</b><br><br><b>2-deoxygalactonolactam-N-Boc (20b) 79%</b> |

**Table 2.** Conditions for partial reduction of 2-deoxyglycolactams **7a/b** and 2-deoxyglycolactam-*N*-Boc **20a/b**.

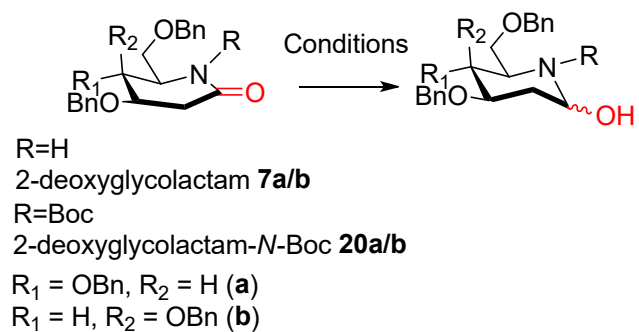

| Entry | Reagents and condition                      | Remark       |
|-------|---------------------------------------------|--------------|
| 1     | NaBH <sub>4</sub> , MeOH, 0 °C              | Sm recovered |
| 2     | NaBH <sub>4</sub> , MeOH, 0 °C, then rt     | Sm recovered |
| 3     | NaBH <sub>4</sub> , THF-MeOH, 0 °C, then rt | Sm recovered |
| 4     | NaBH <sub>4</sub> , THF-MeOH, rt            | Sm recovered |

$^1\text{H}$  NMR of **8a** (400 MHz,  $\text{CDCl}_3$ )

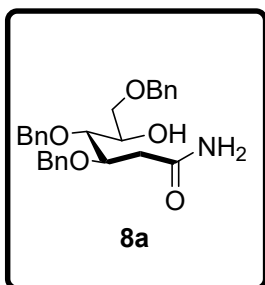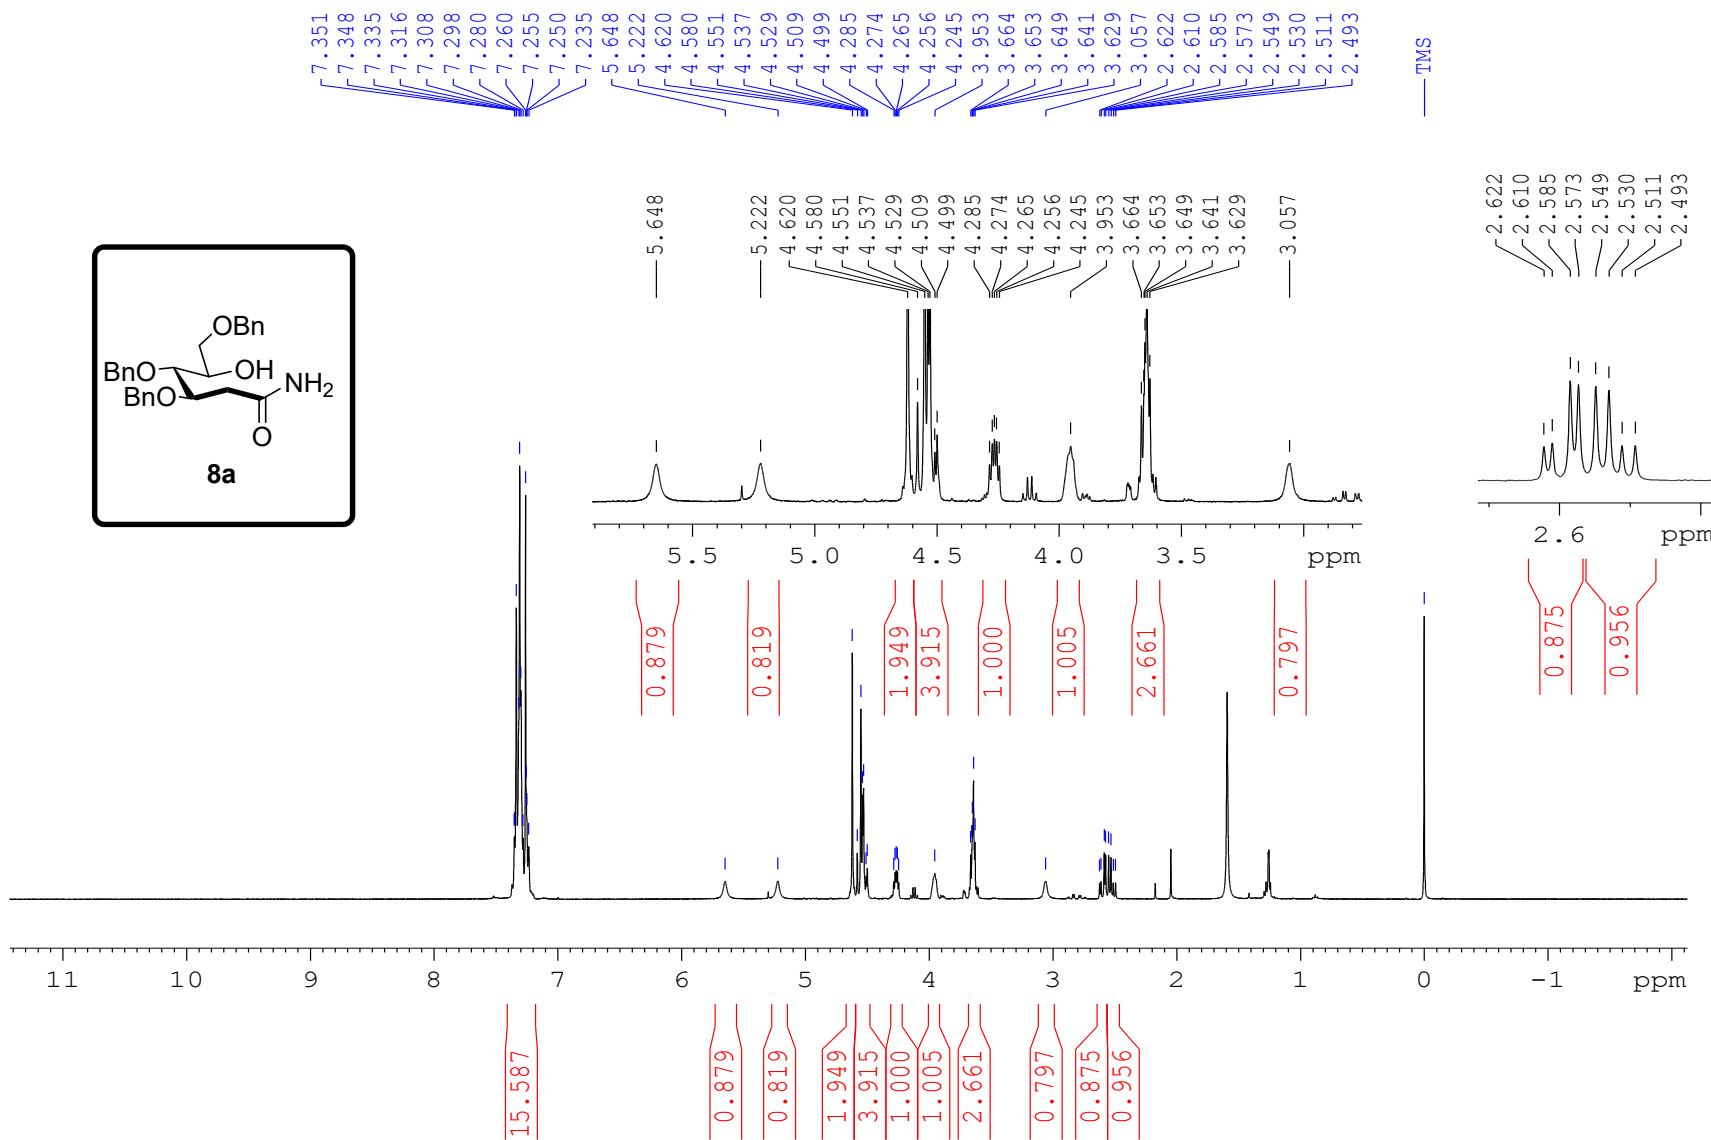

<sup>13</sup>C NMR of **8a** (100 MHz, CDCl<sub>3</sub>)

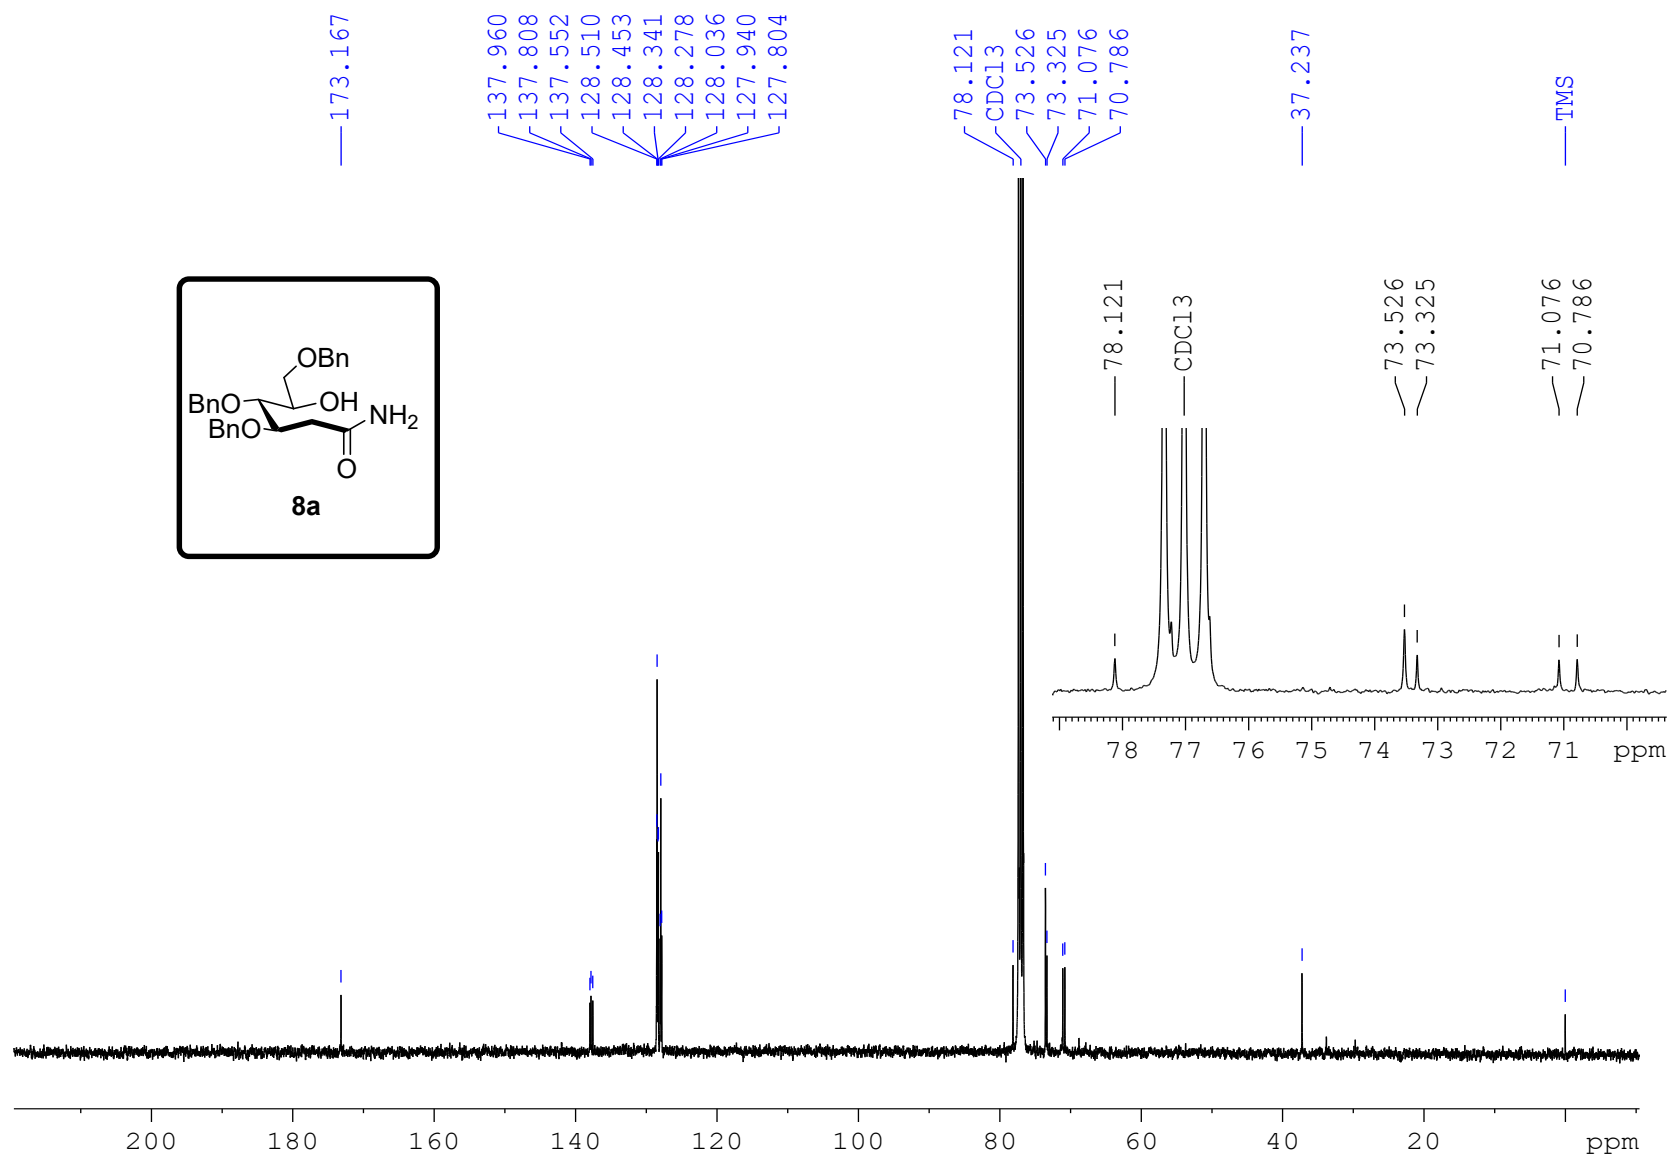



DEPT of **8a** (100 MHz, CDCl<sub>3</sub>)

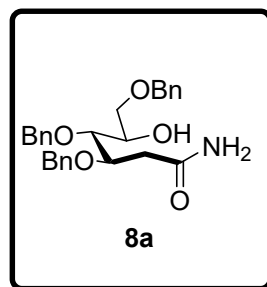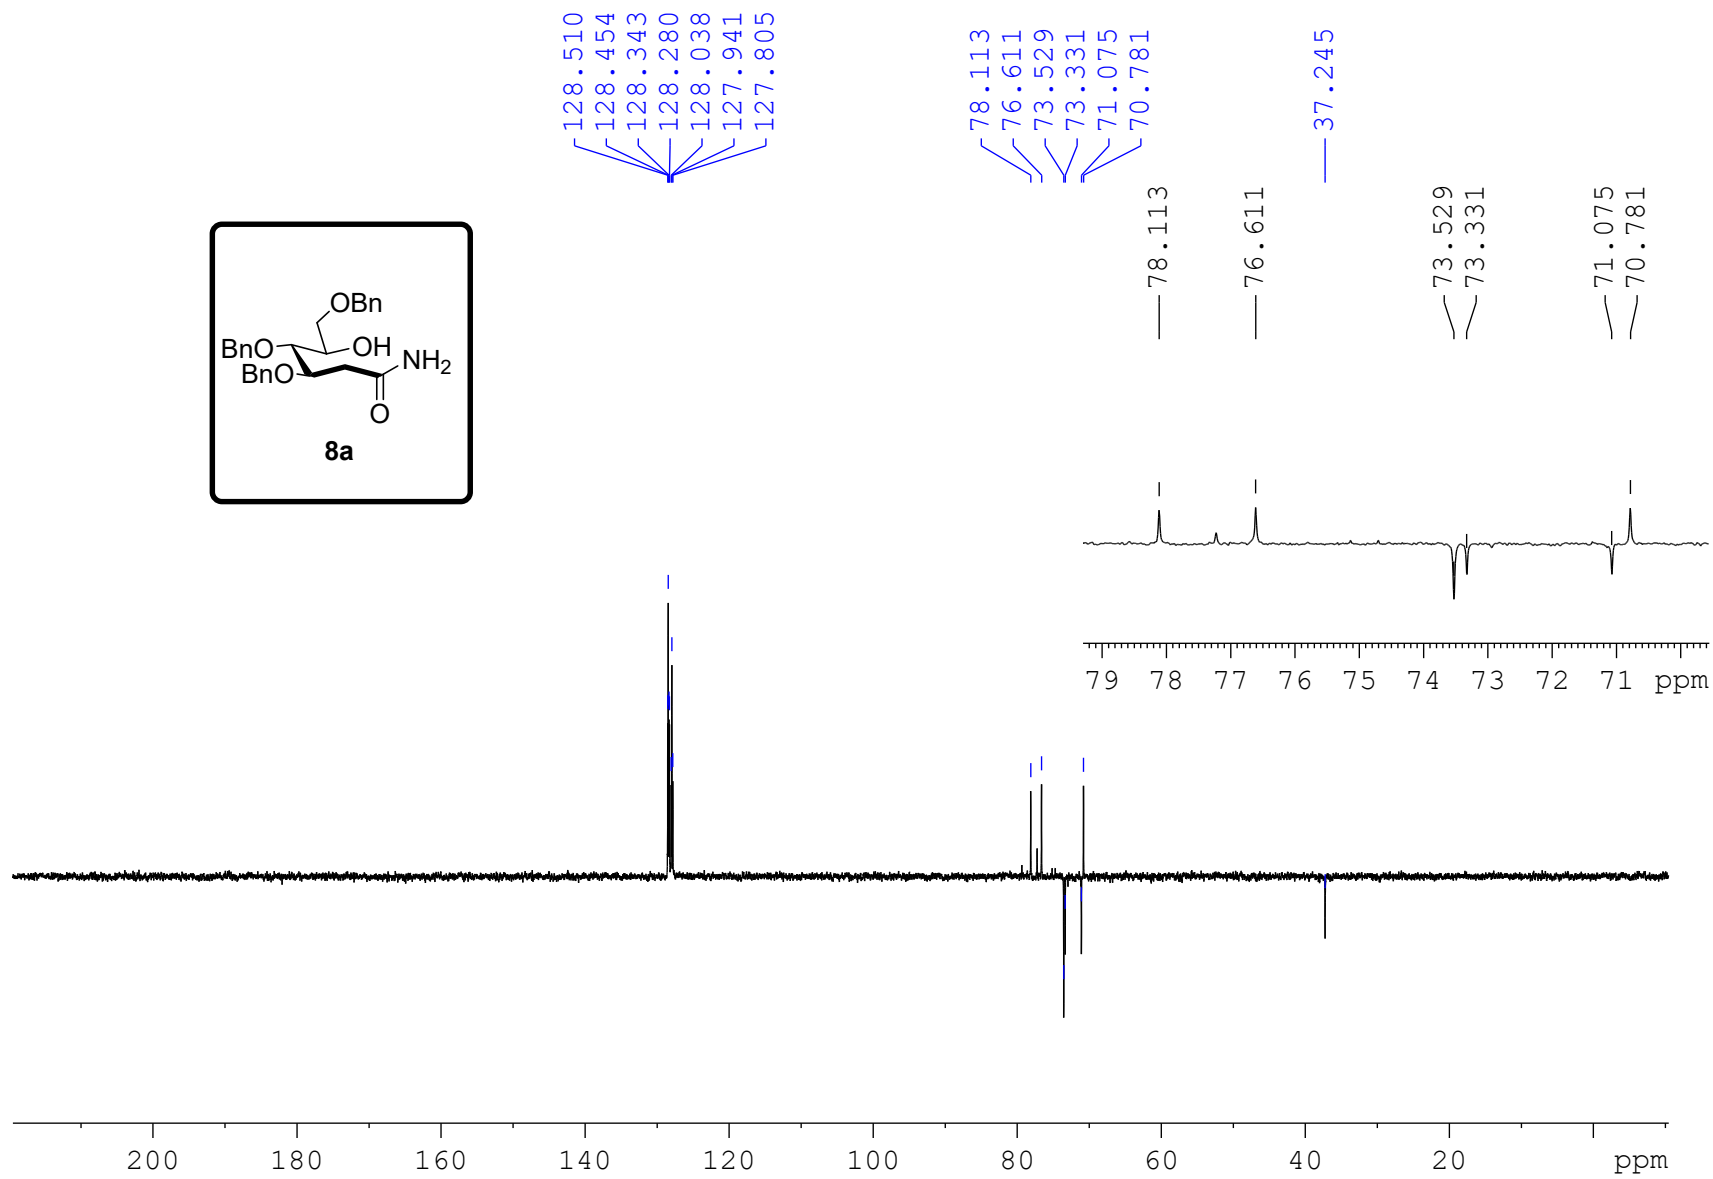

ESI-MS of **8a**

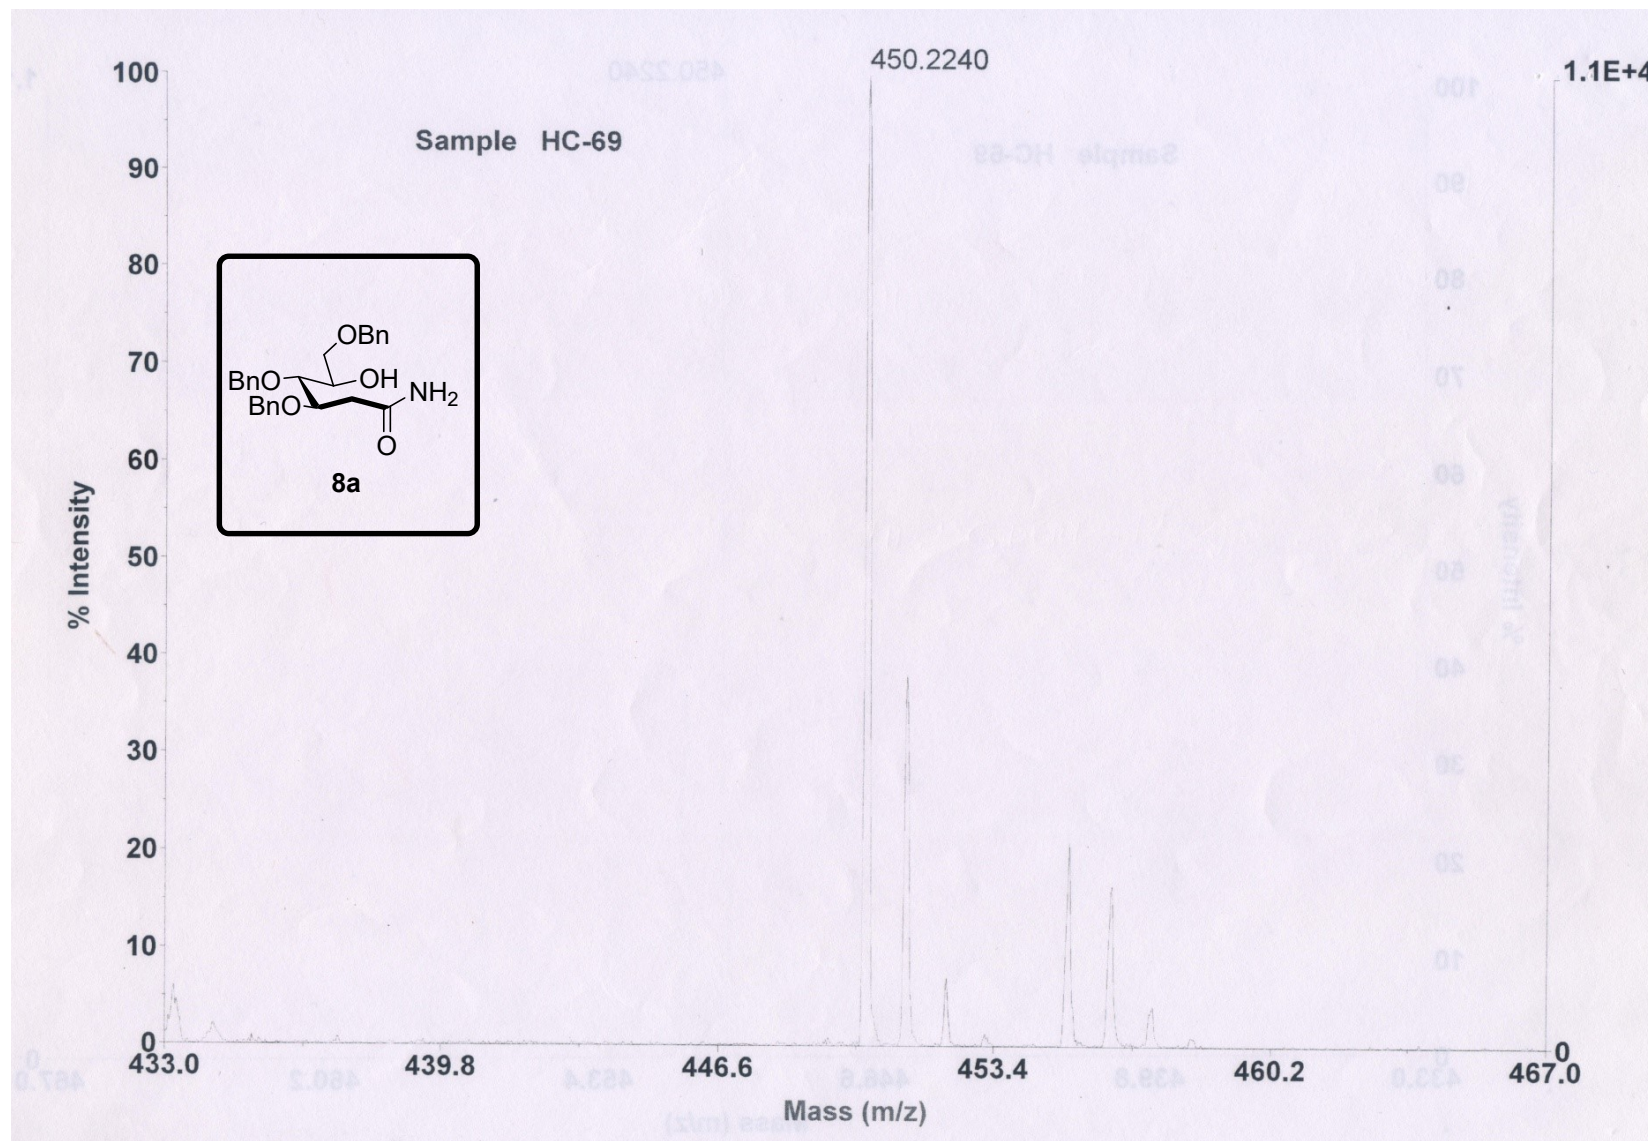

# HRMS (ESI) of 8a

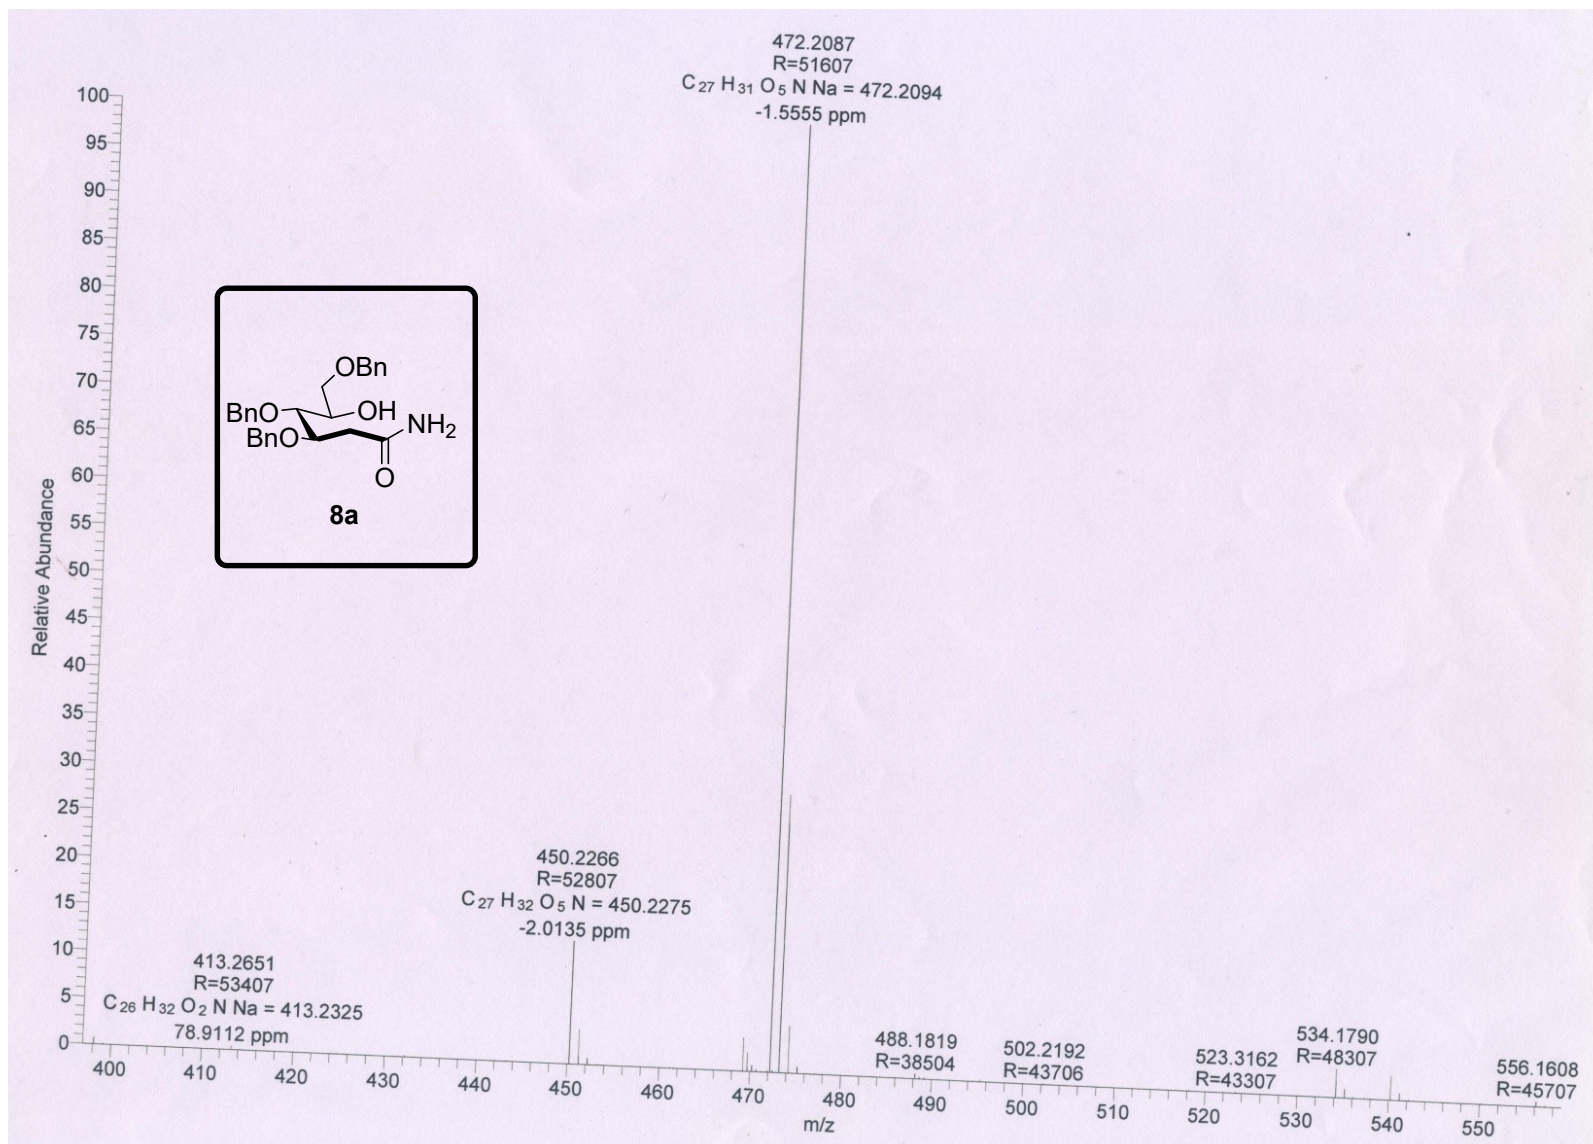

<sup>1</sup>H NMR of **8b** (400 MHz, CDCl<sub>3</sub>)

73 PMR.esp

73 PI

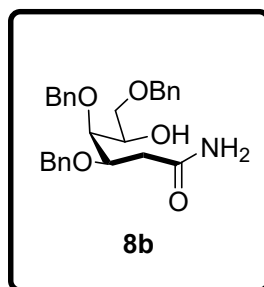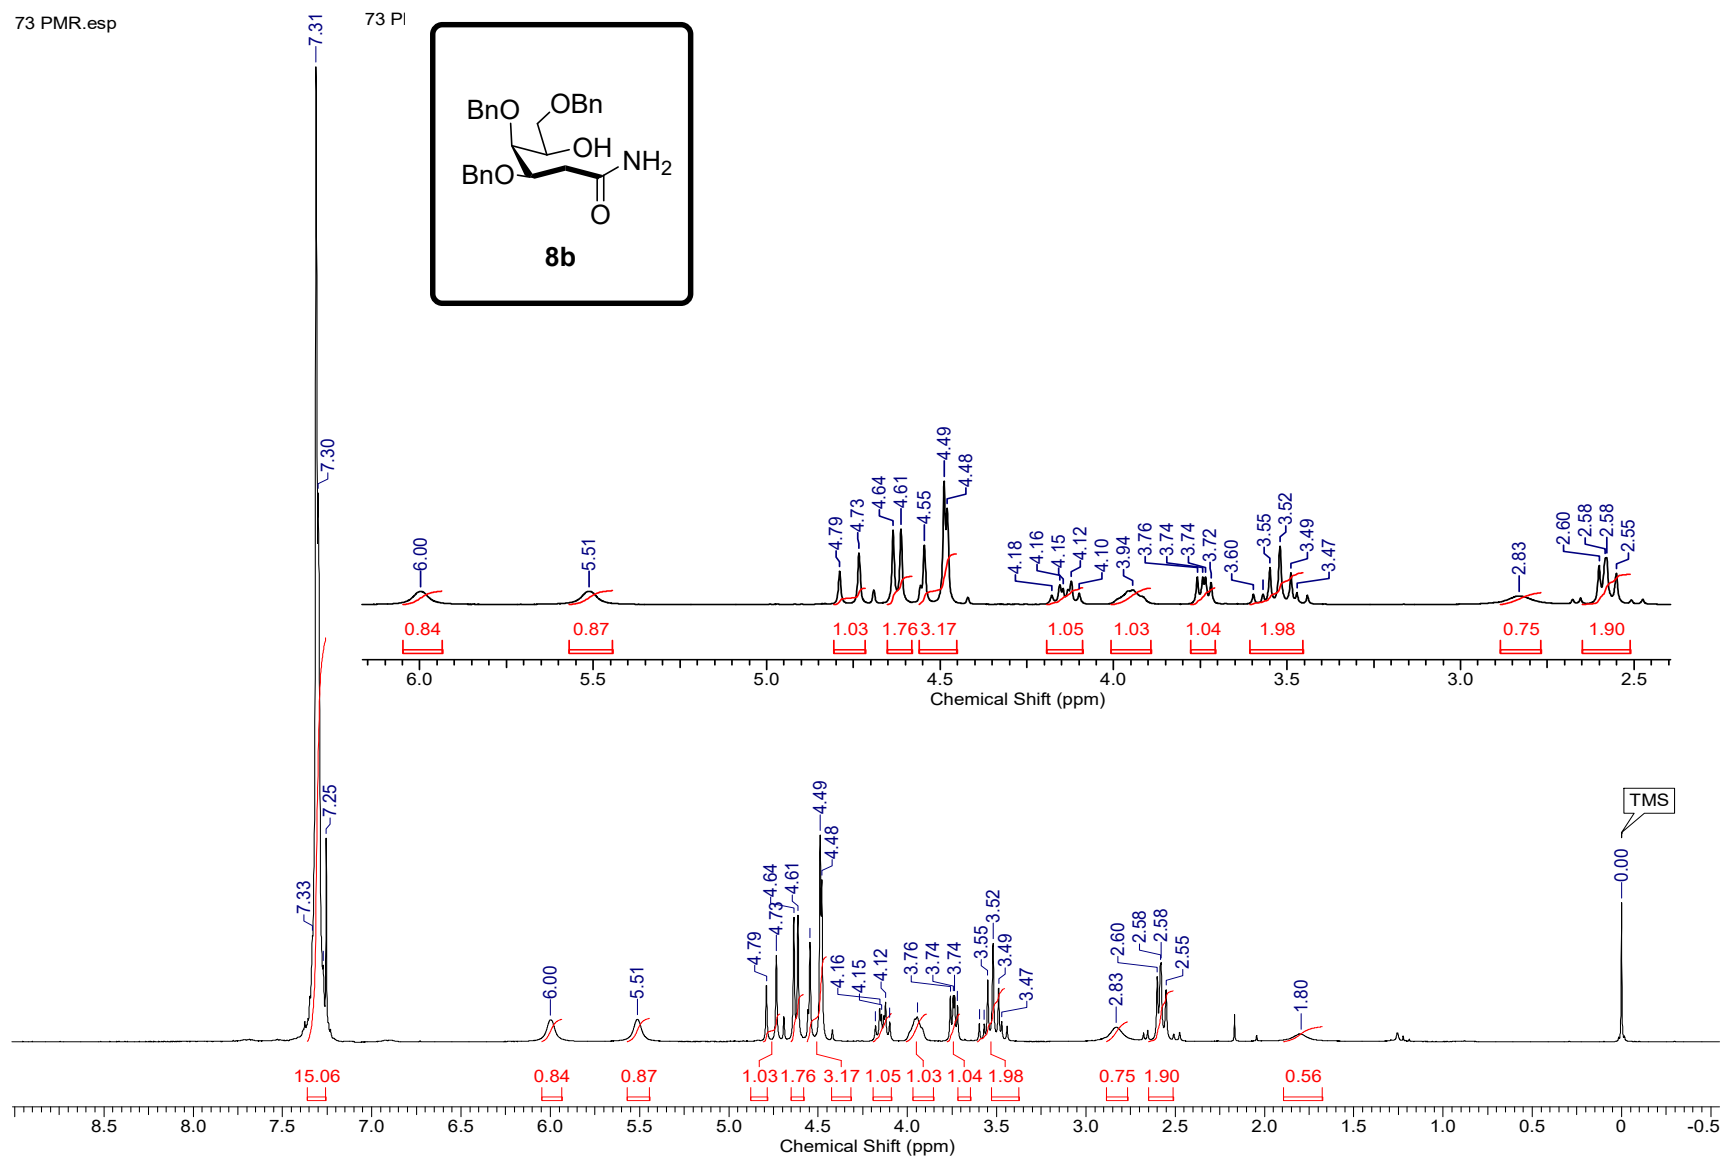

<sup>13</sup>C NMR of **8b** (50 MHz, CDCl<sub>3</sub>)

73 CMR.esp

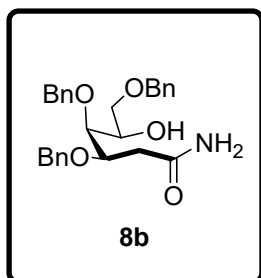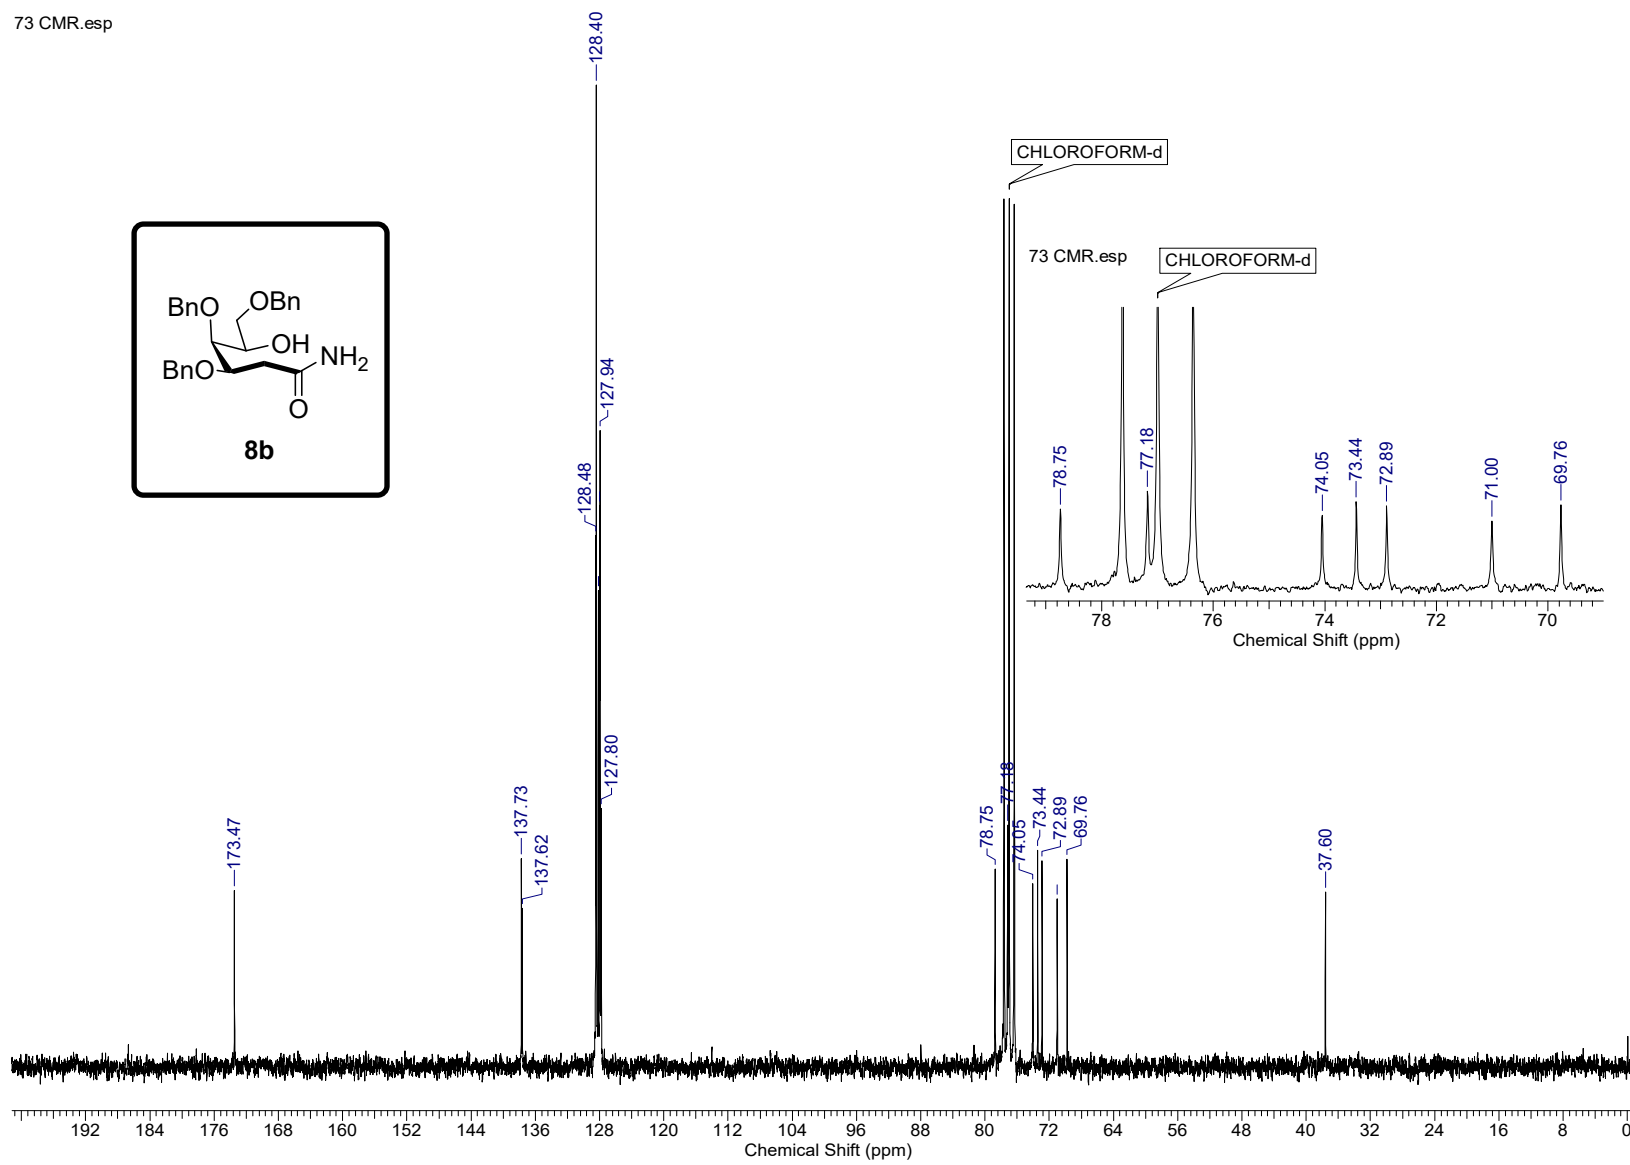

DEPT of **8b** (50 MHz, CDCl<sub>3</sub>)

73 DEPT.esp

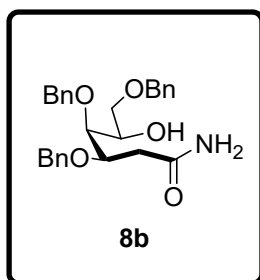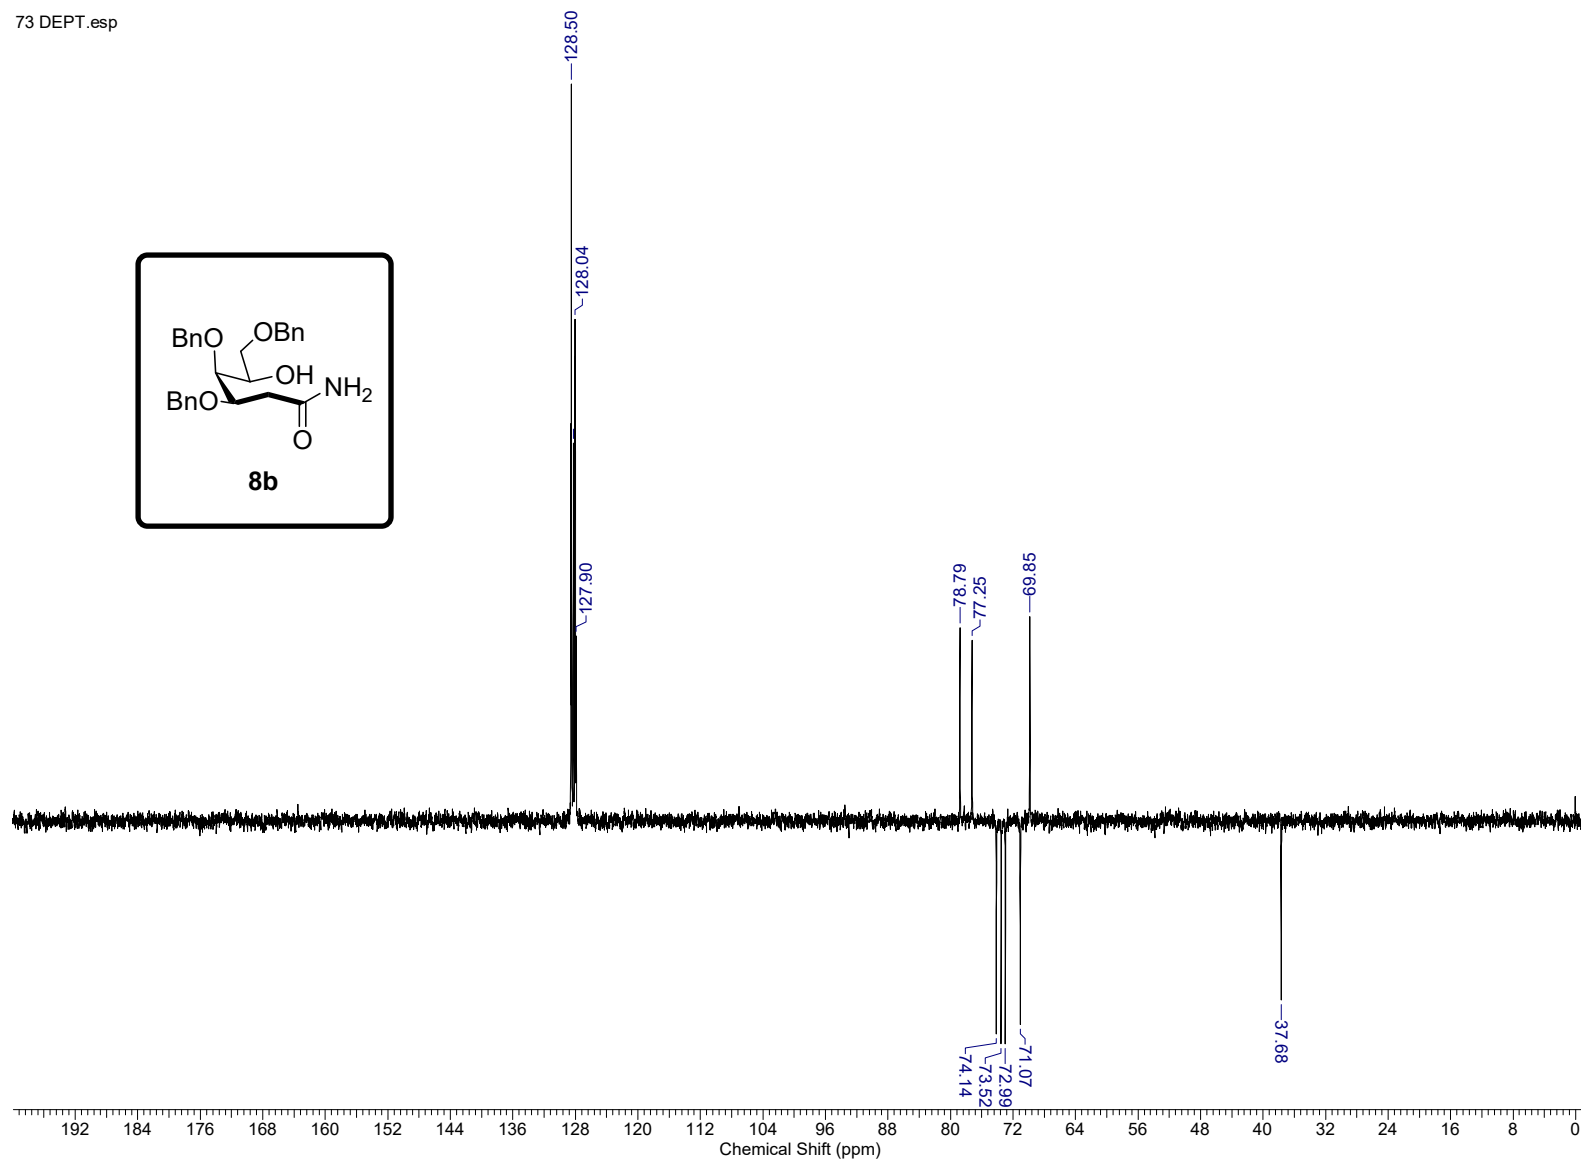

# ESI-MS of **8b**

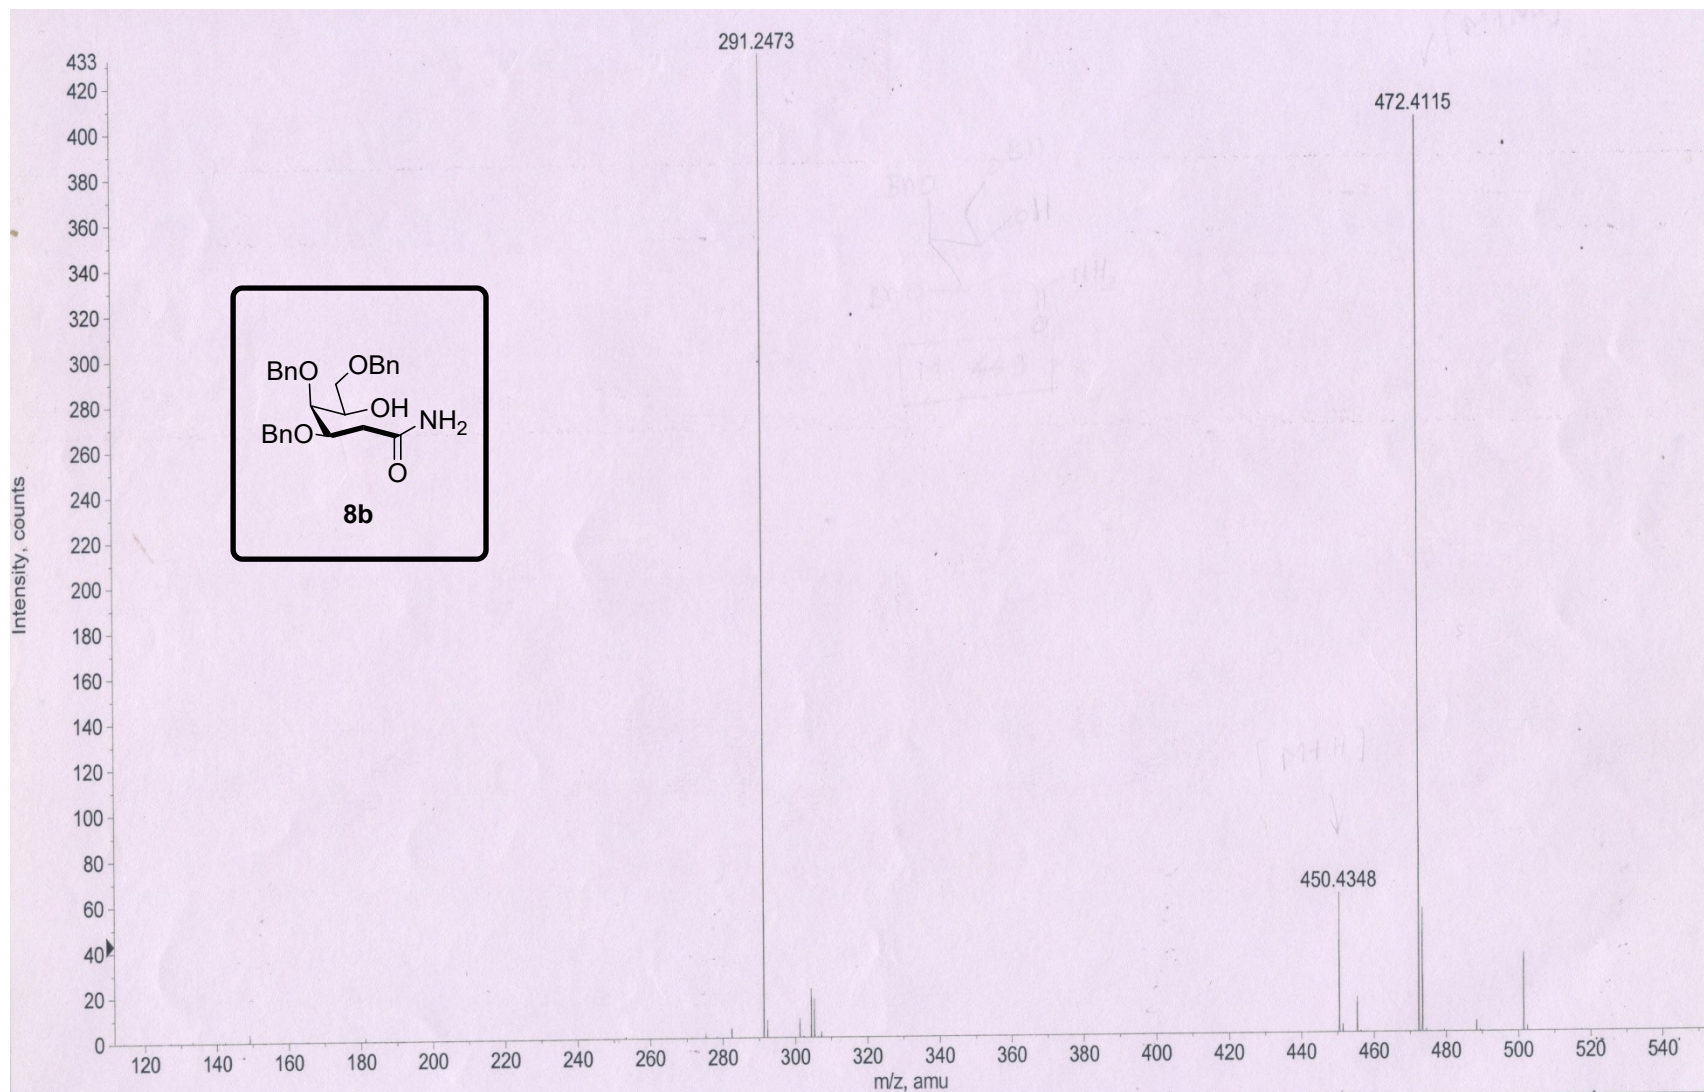

# HRMS (ESI) of **8b**

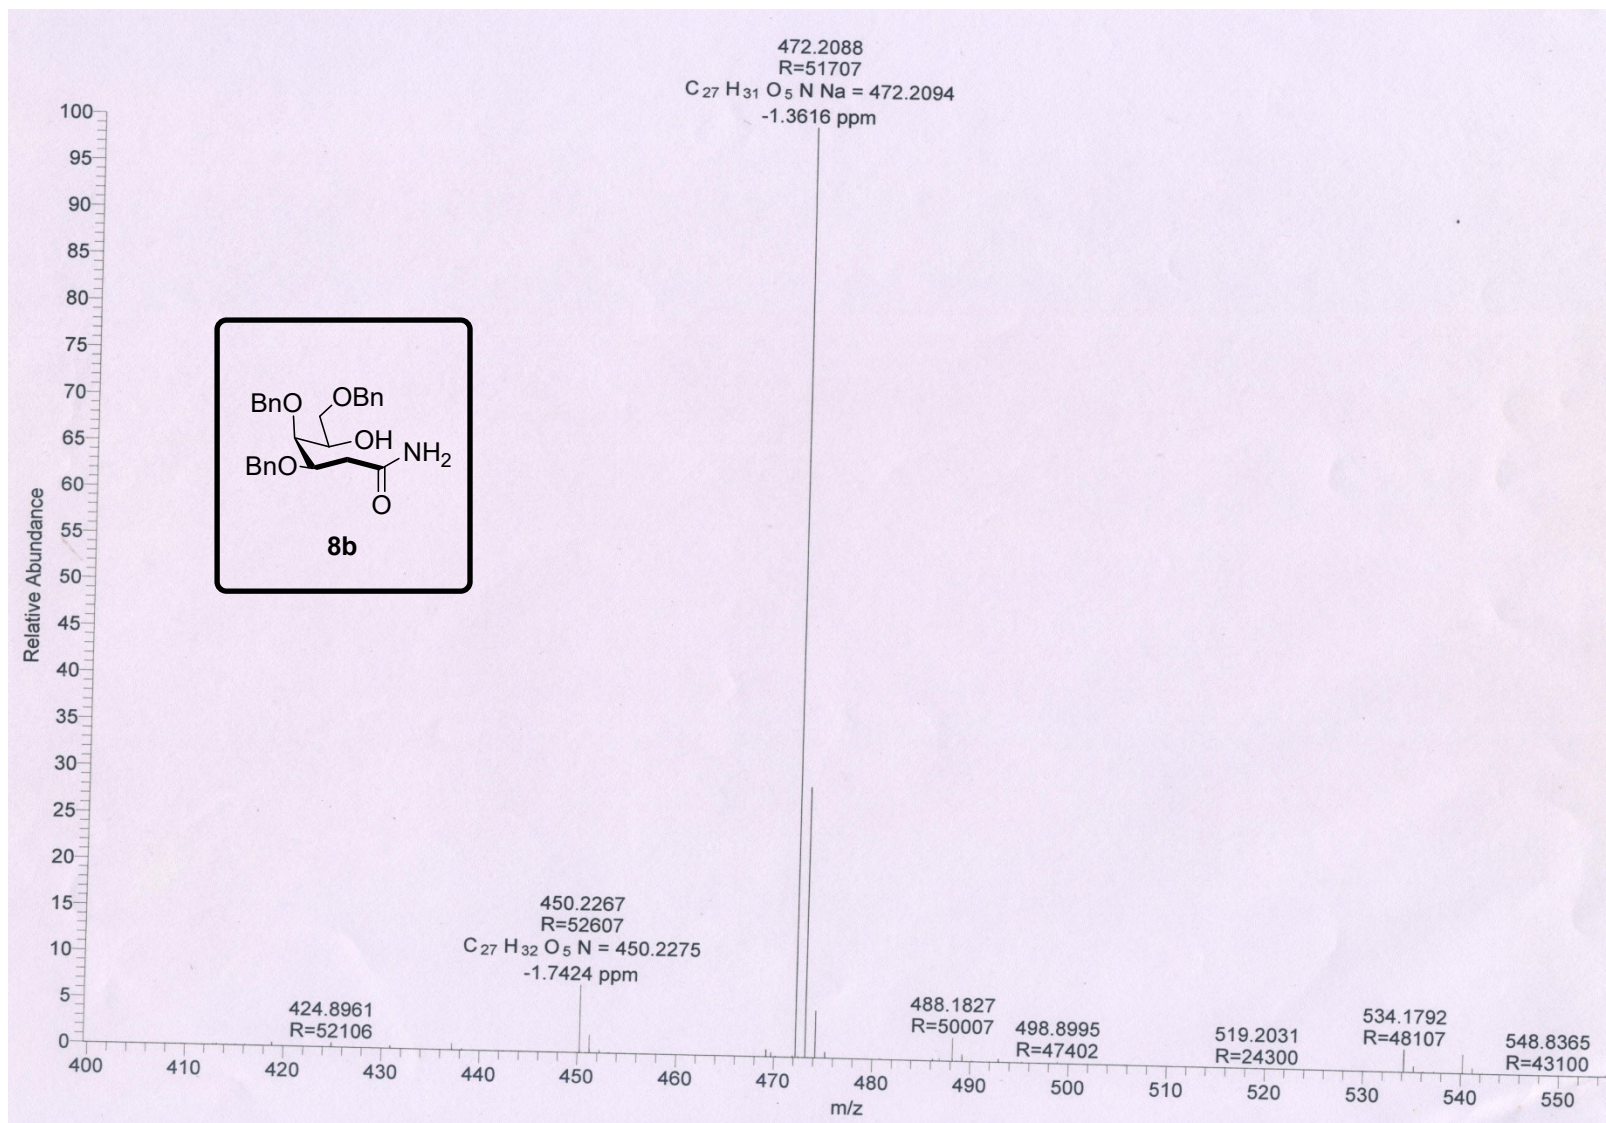



<sup>1</sup>H NMR of 7a (500MHz, CDCl<sub>3</sub>)

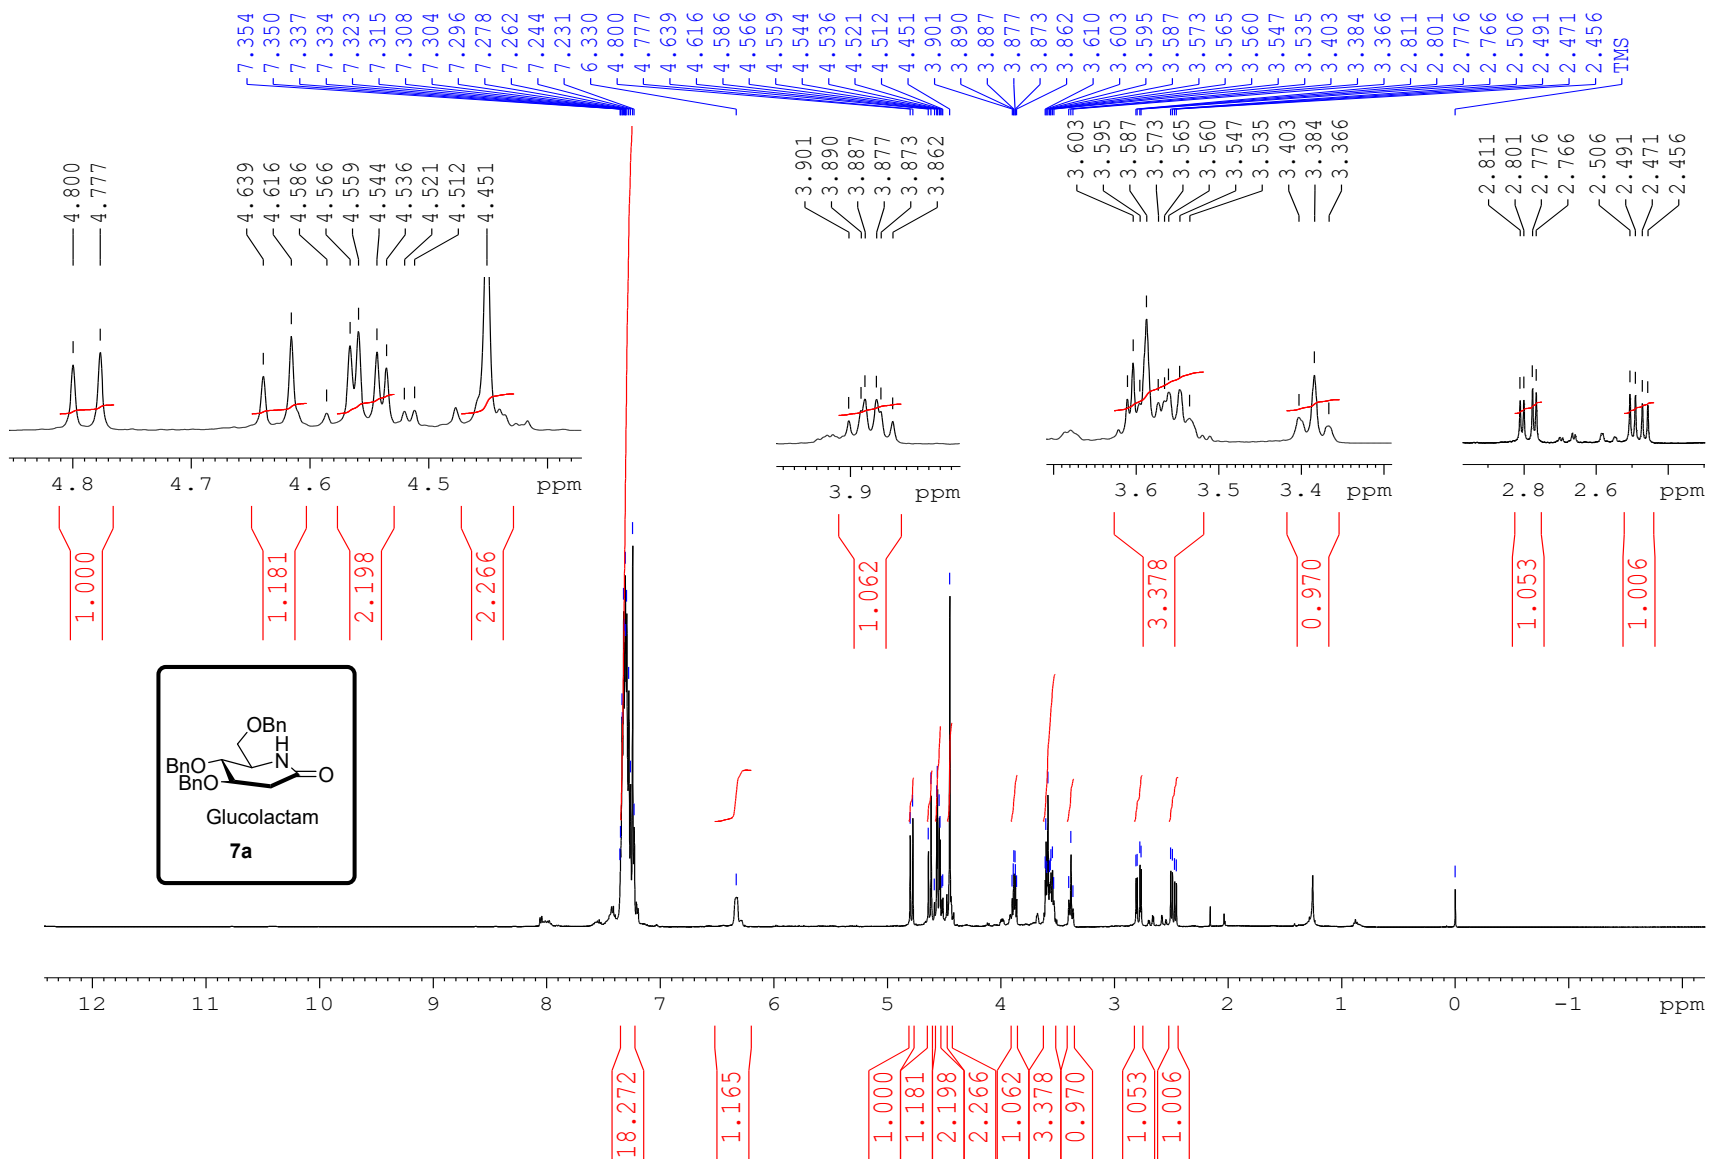

<sup>13</sup>C NMR of **7a** (125MHz, CDCl<sub>3</sub>)

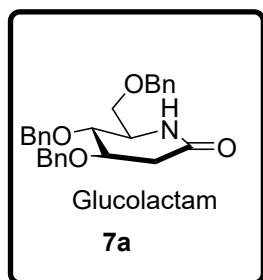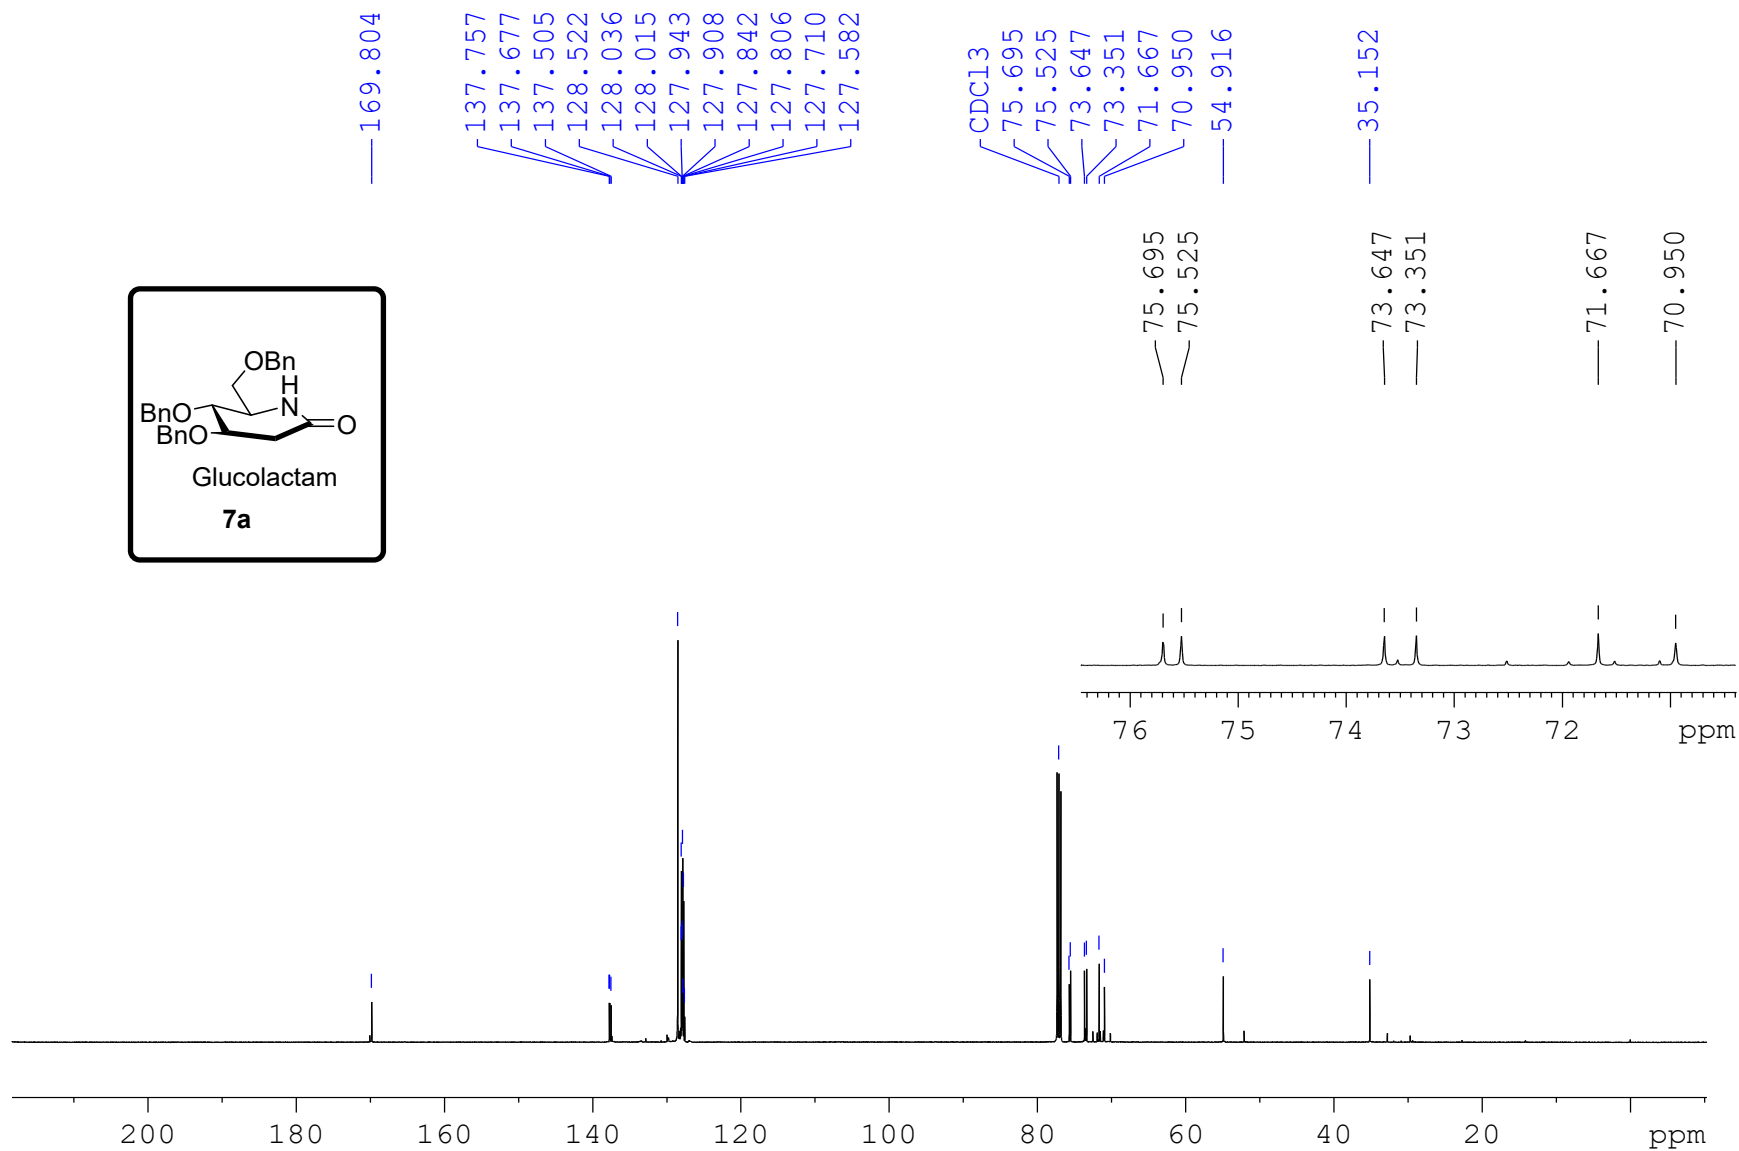

DEPT of **7a** (100MHz, CDCl<sub>3</sub>)

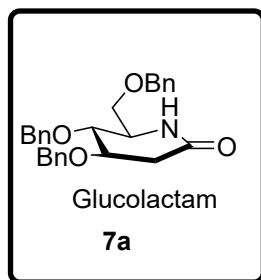

128.528  
128.037  
127.979  
127.933  
127.847  
127.716

75.710  
75.507  
73.673  
73.348  
71.672  
70.947  
— 54.887

— 35.165

75.710  
75.507

73.673  
73.348

71.672

70.947

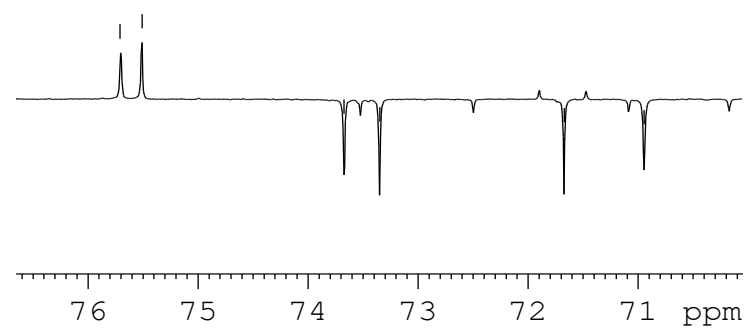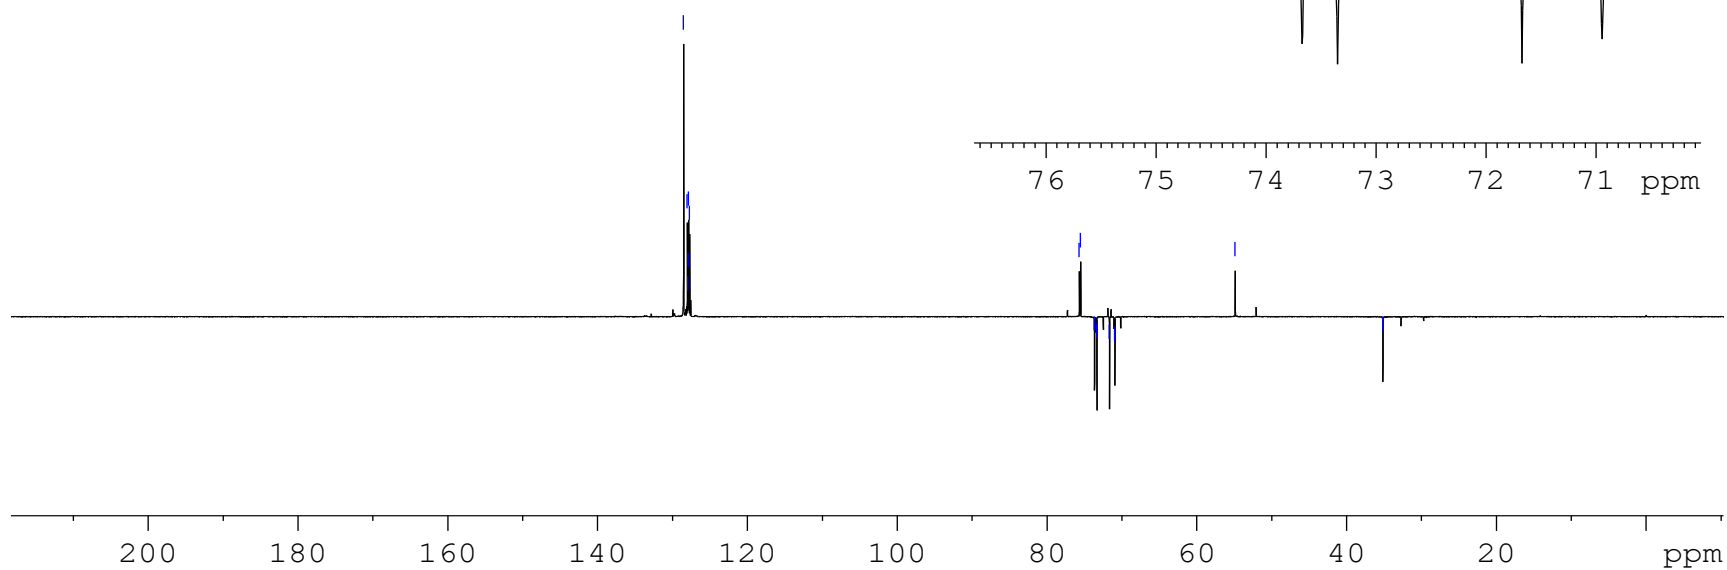

$^1\text{H}$ - $^1\text{H}$  COSY of **7a** (400MHz,  $\text{CDCl}_3$ , 298 K)

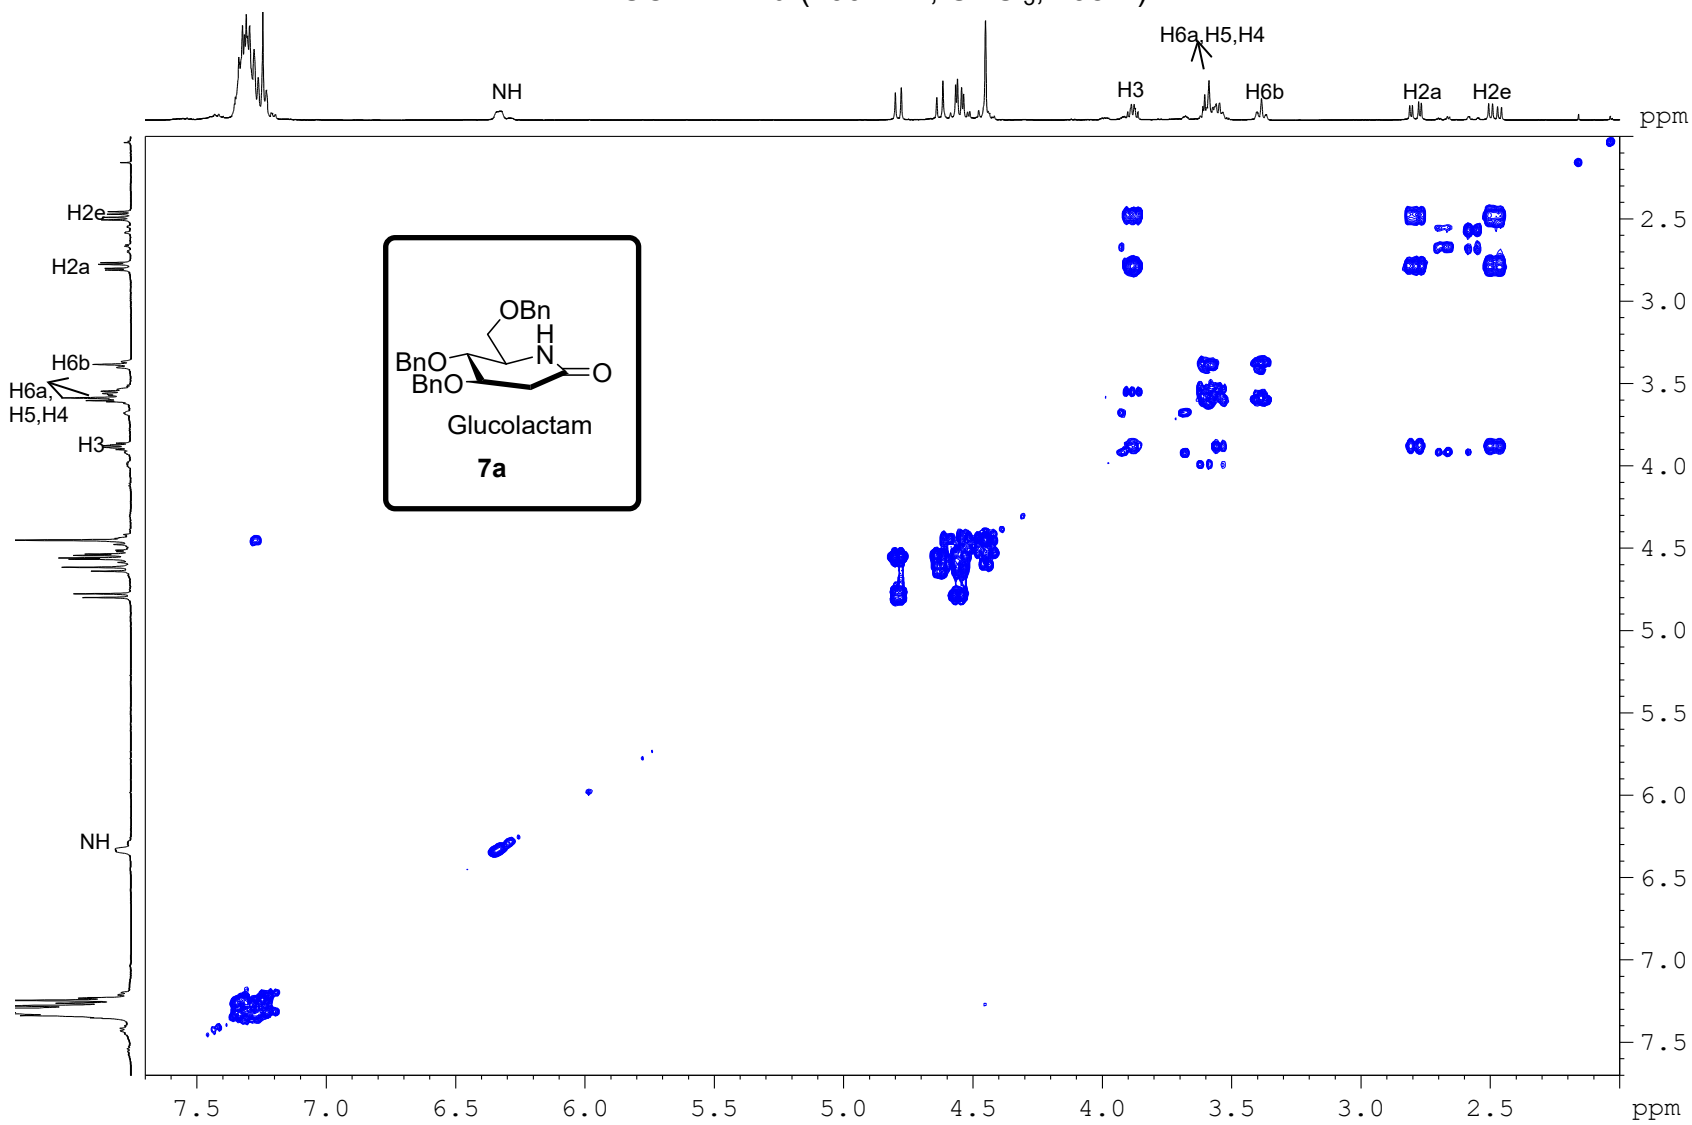

HSQC of **7a** (400MHz, CDCl<sub>3</sub>, 298 K)

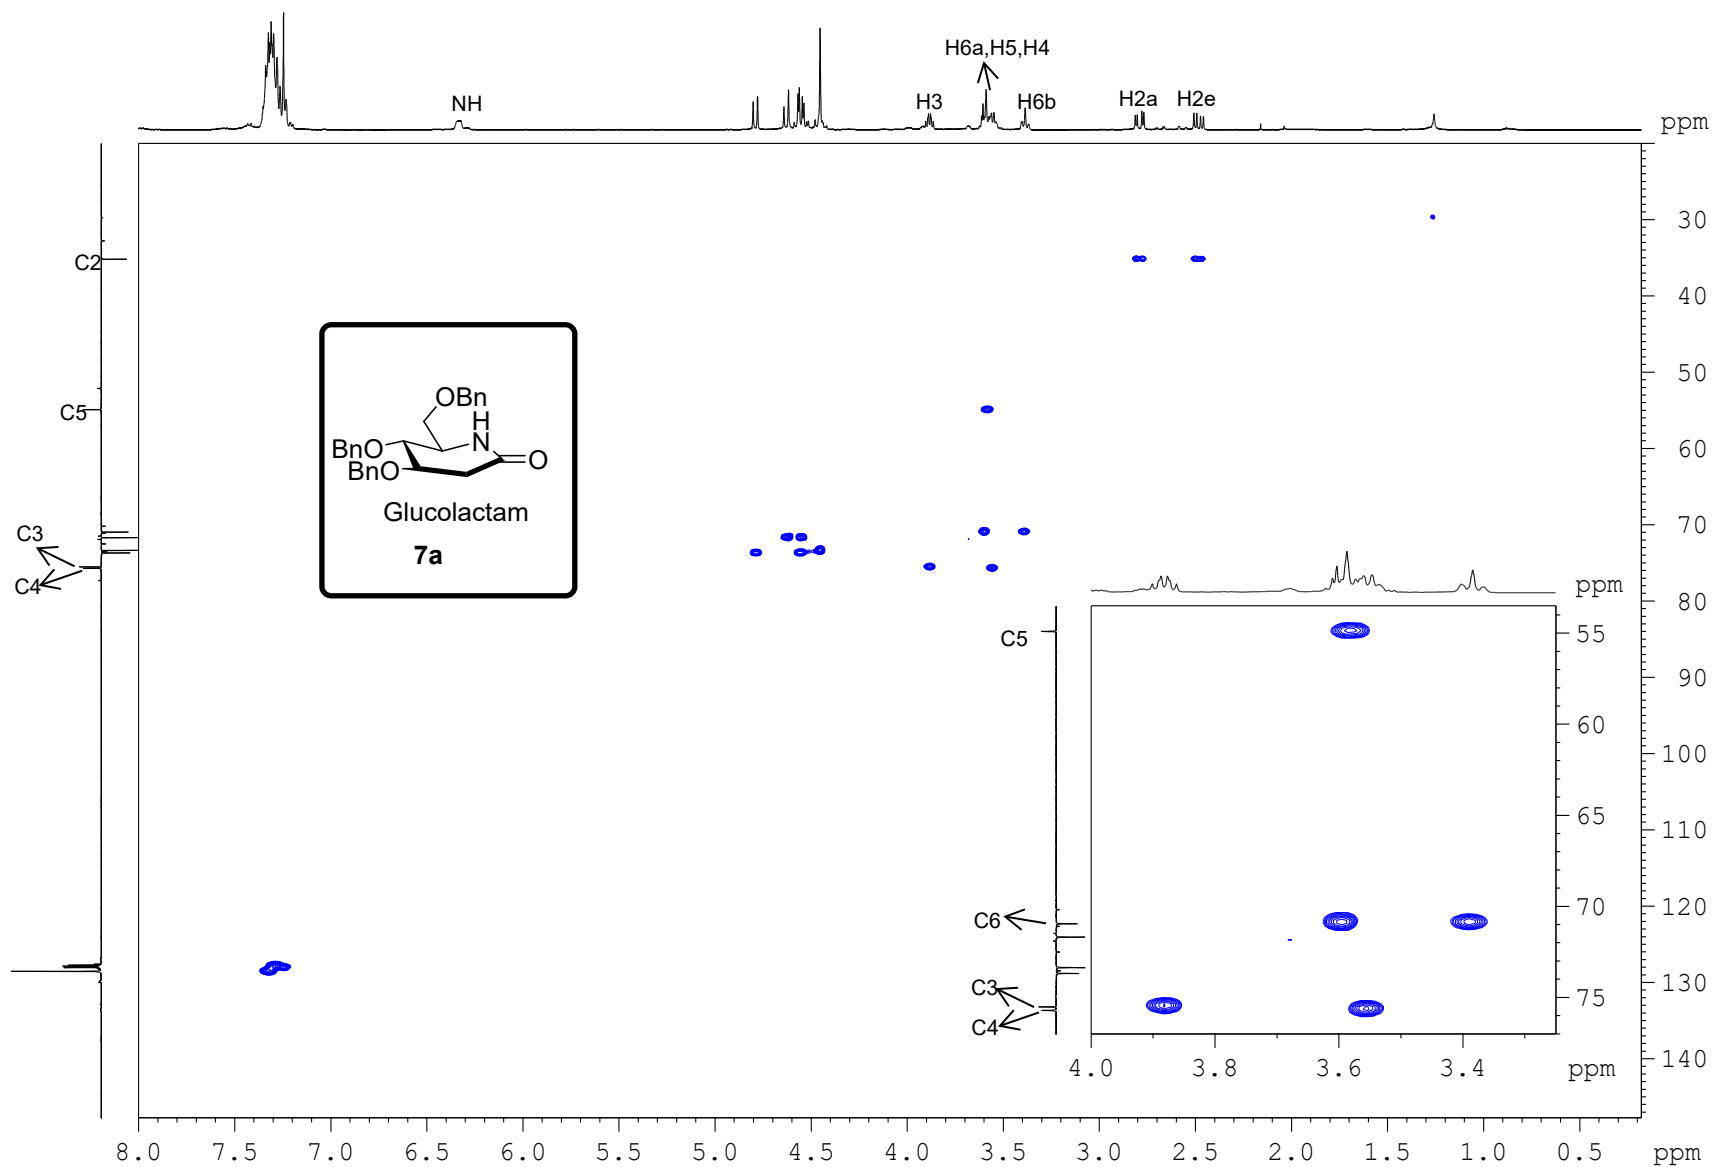

HMBC of **7a** (400MHz, CDCl<sub>3</sub>, 298 K)

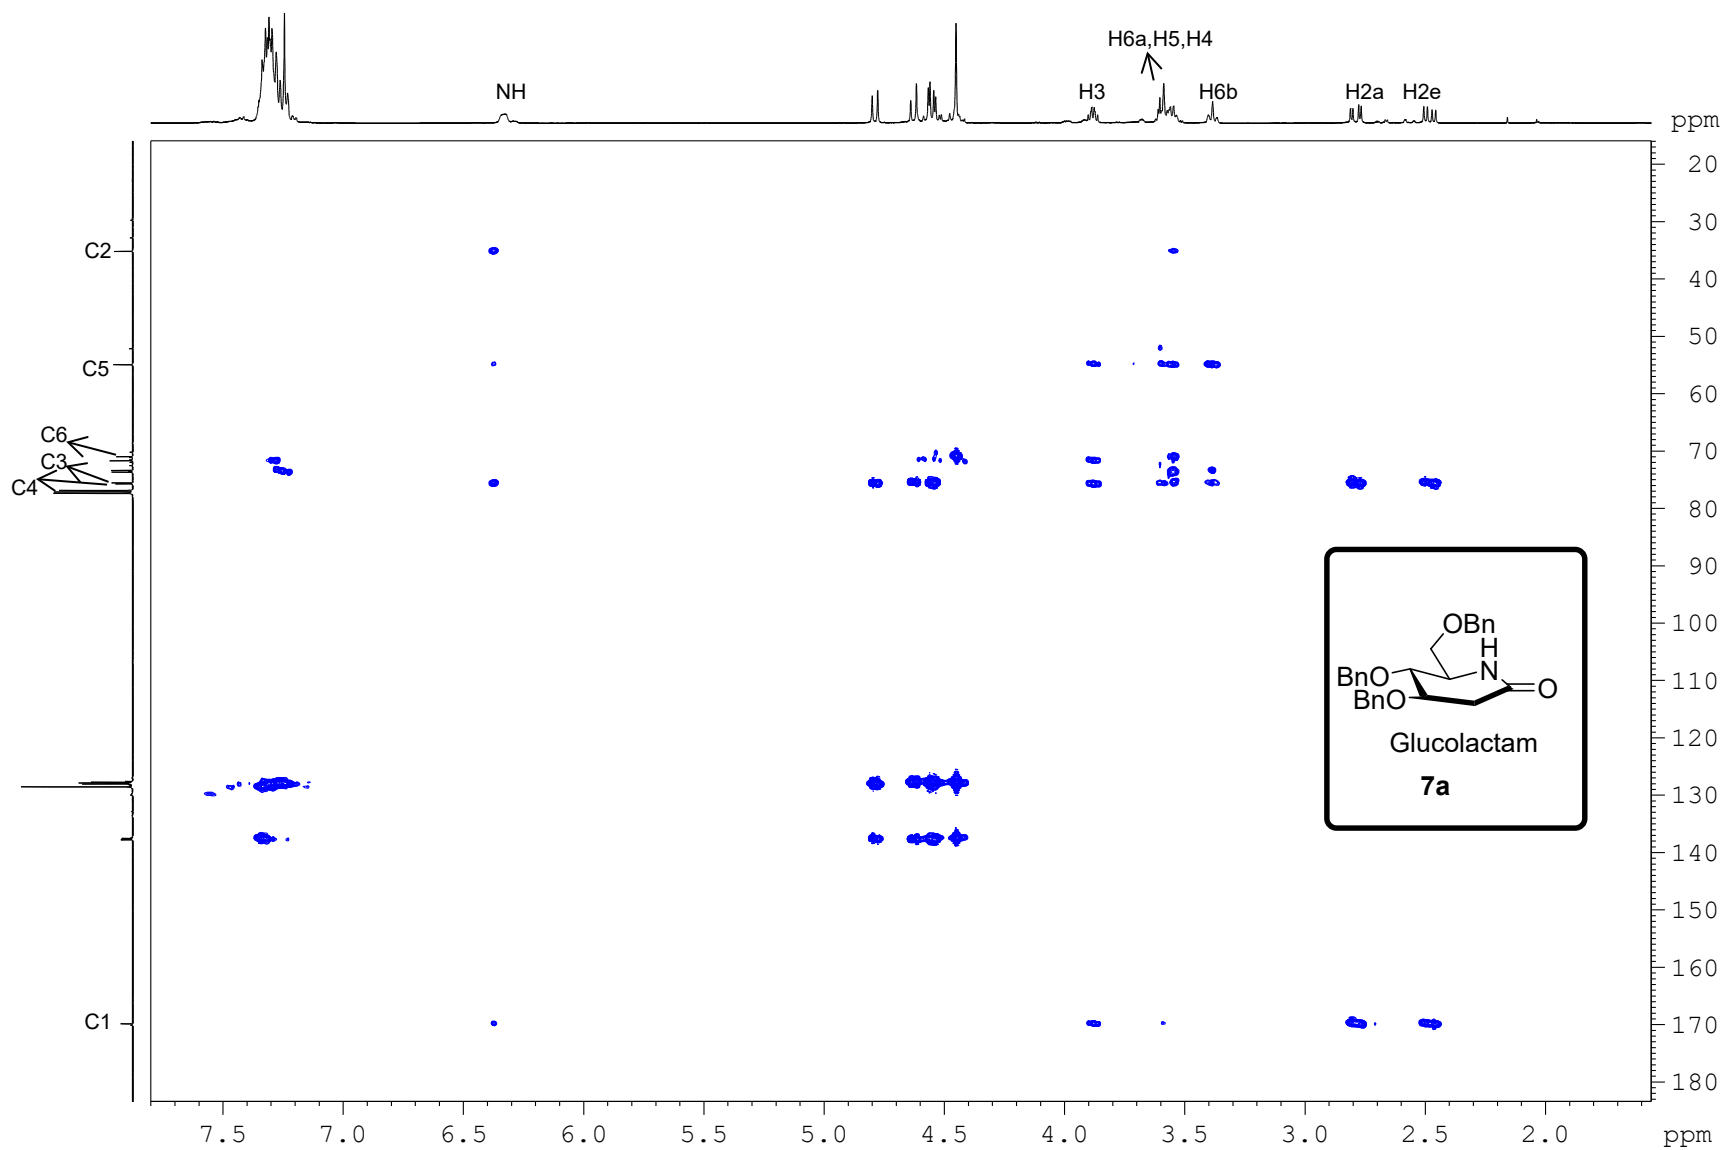

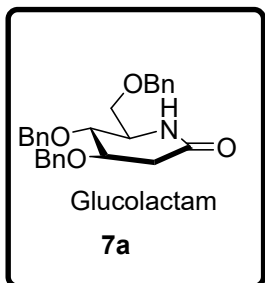

NOESY of **7a** (400MHz, CD<sub>3</sub>OD, 298 K)

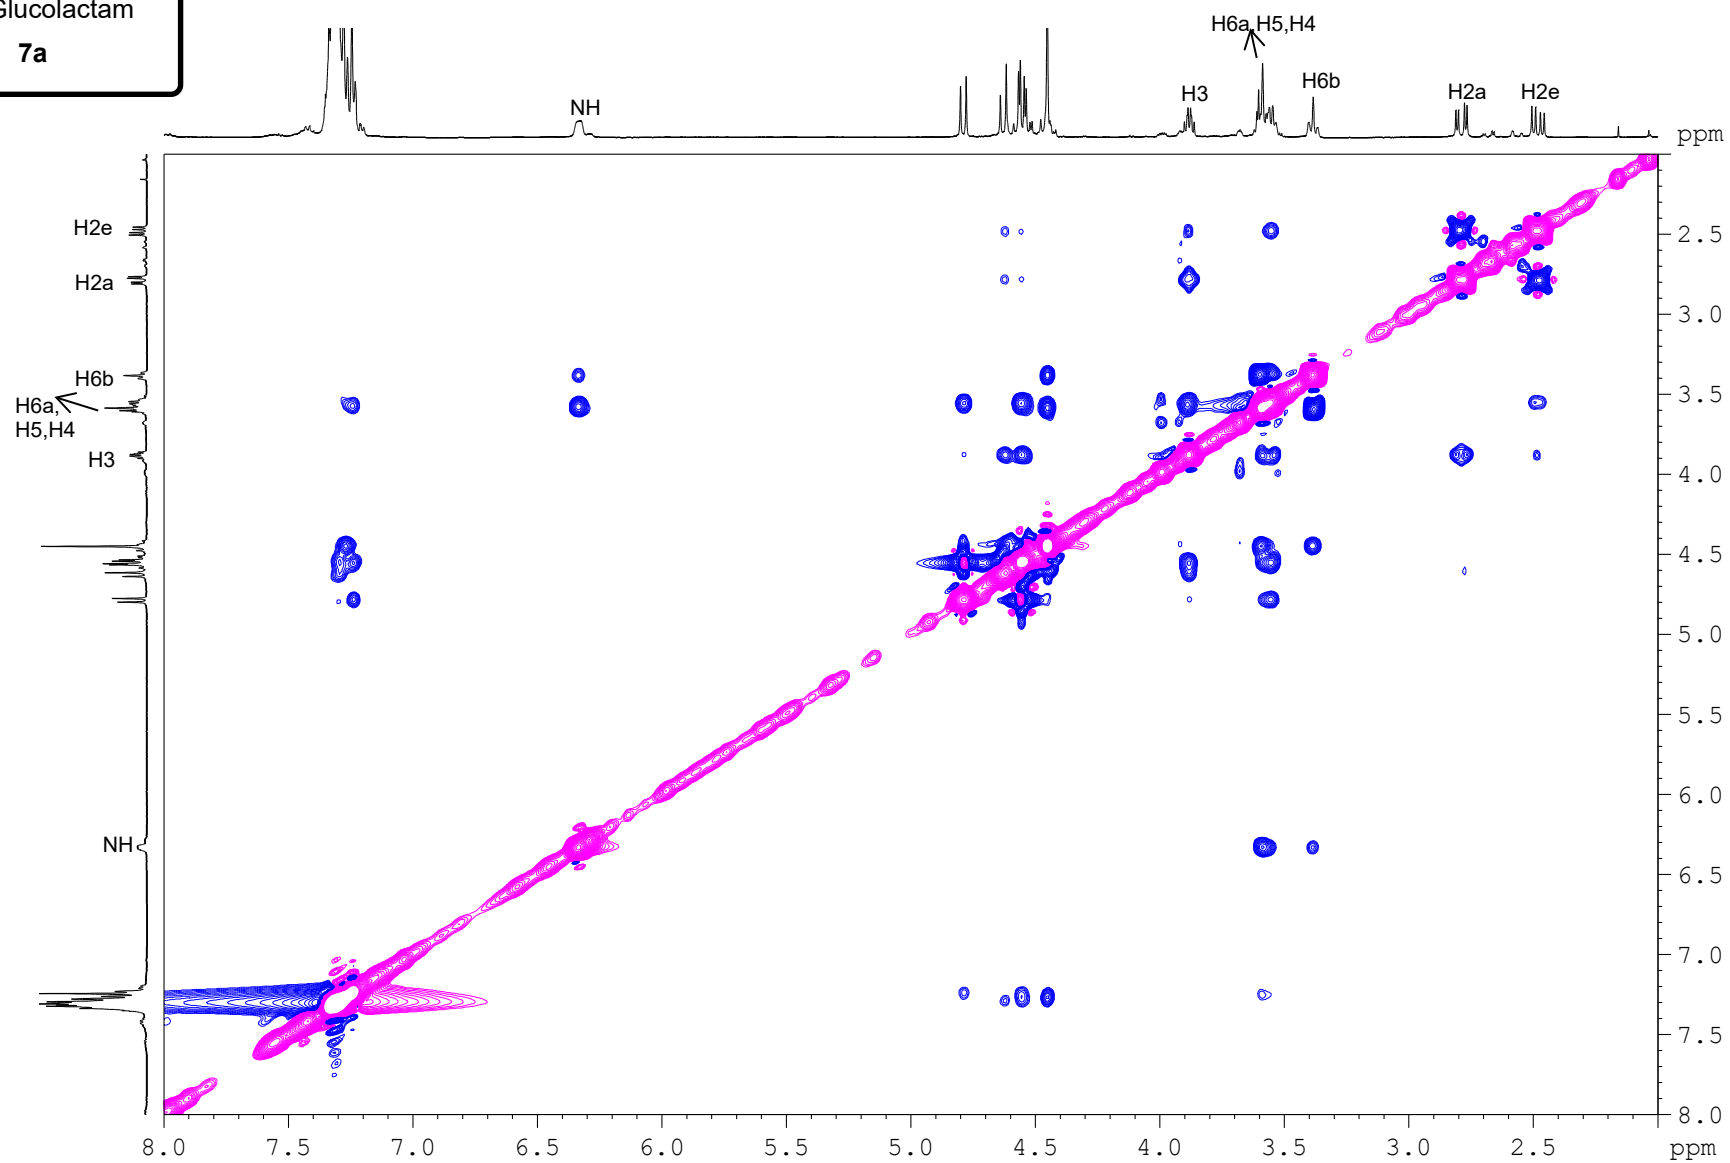

# ES-MS of 7a

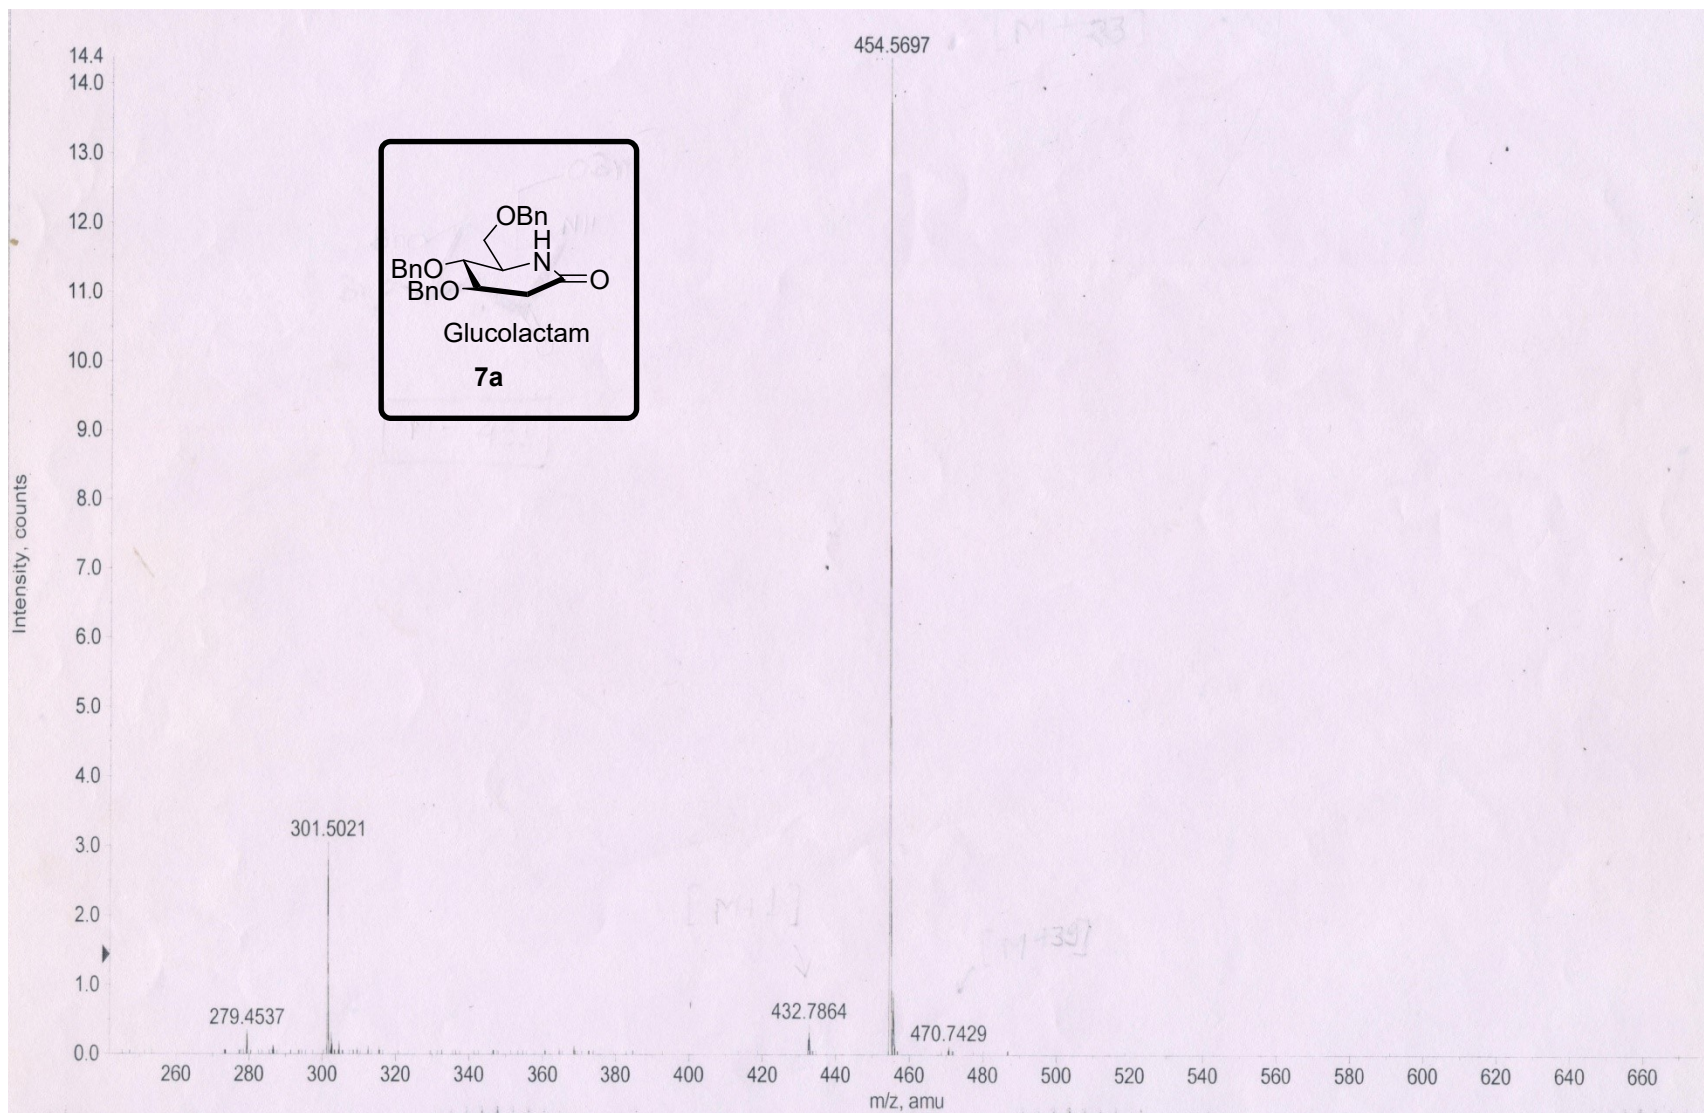



HRMS (ESI) of **7a**

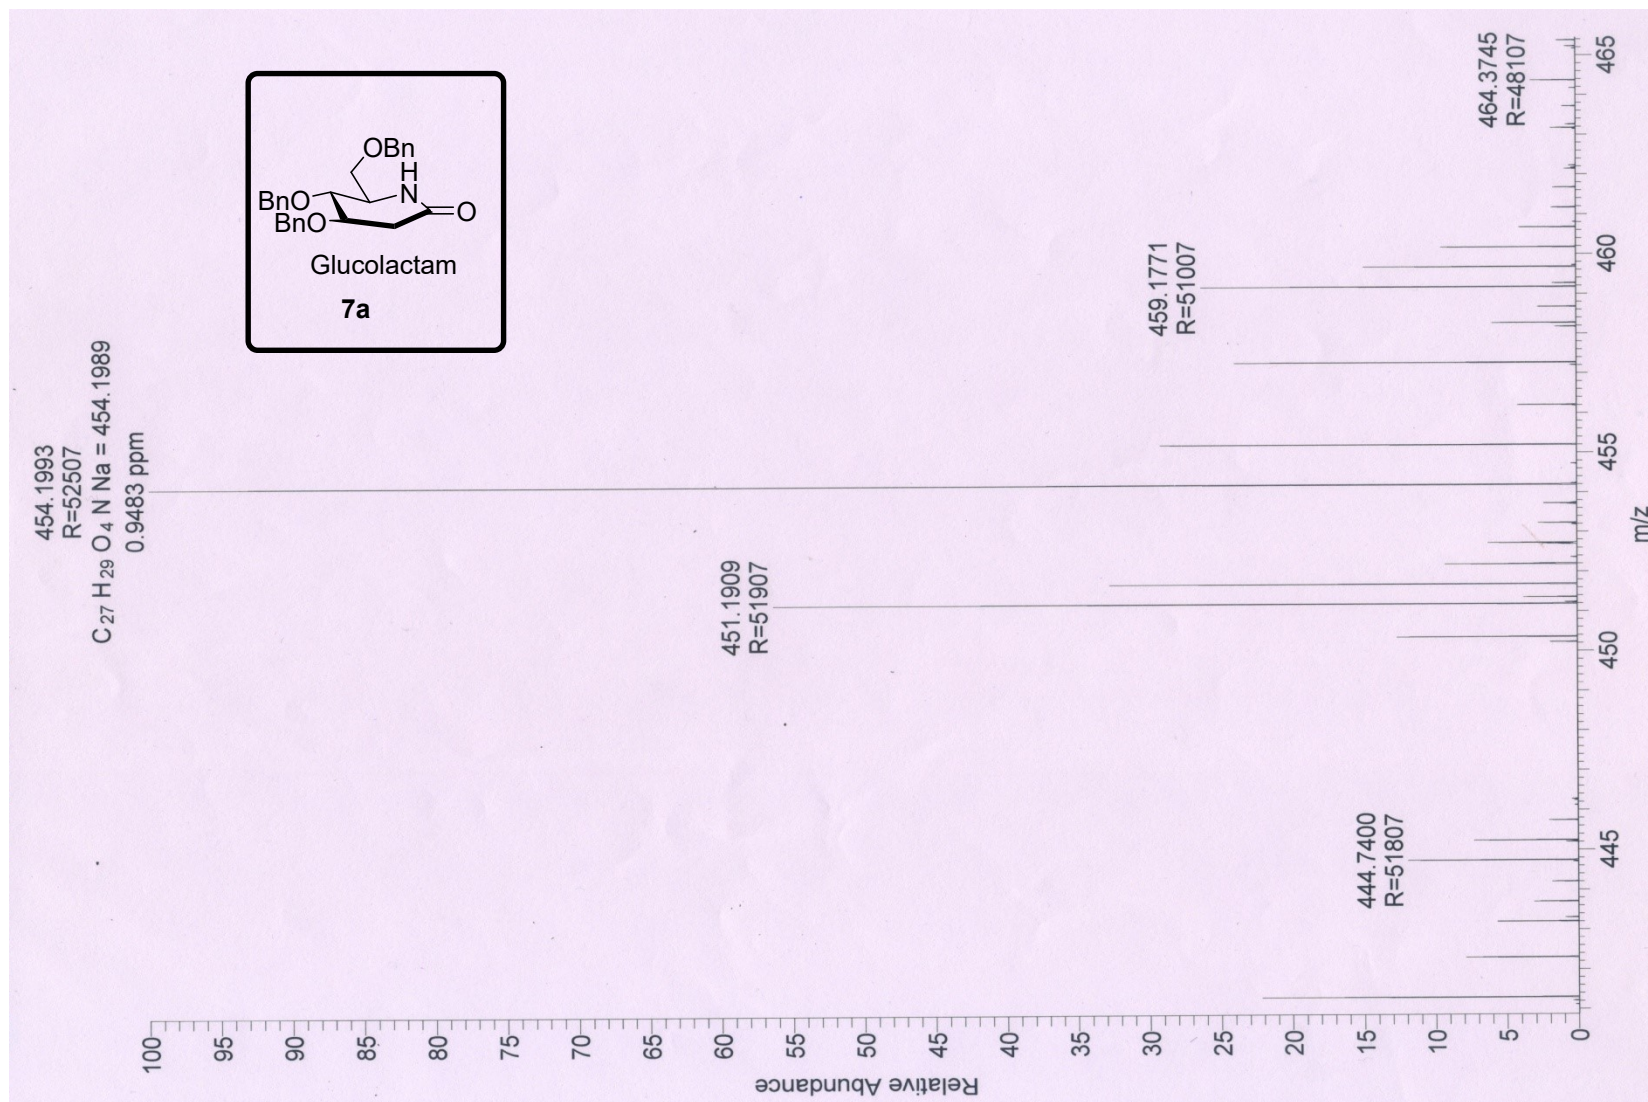

<sup>1</sup>H NMR of **7b** (200MHz, CDCl<sub>3</sub>)

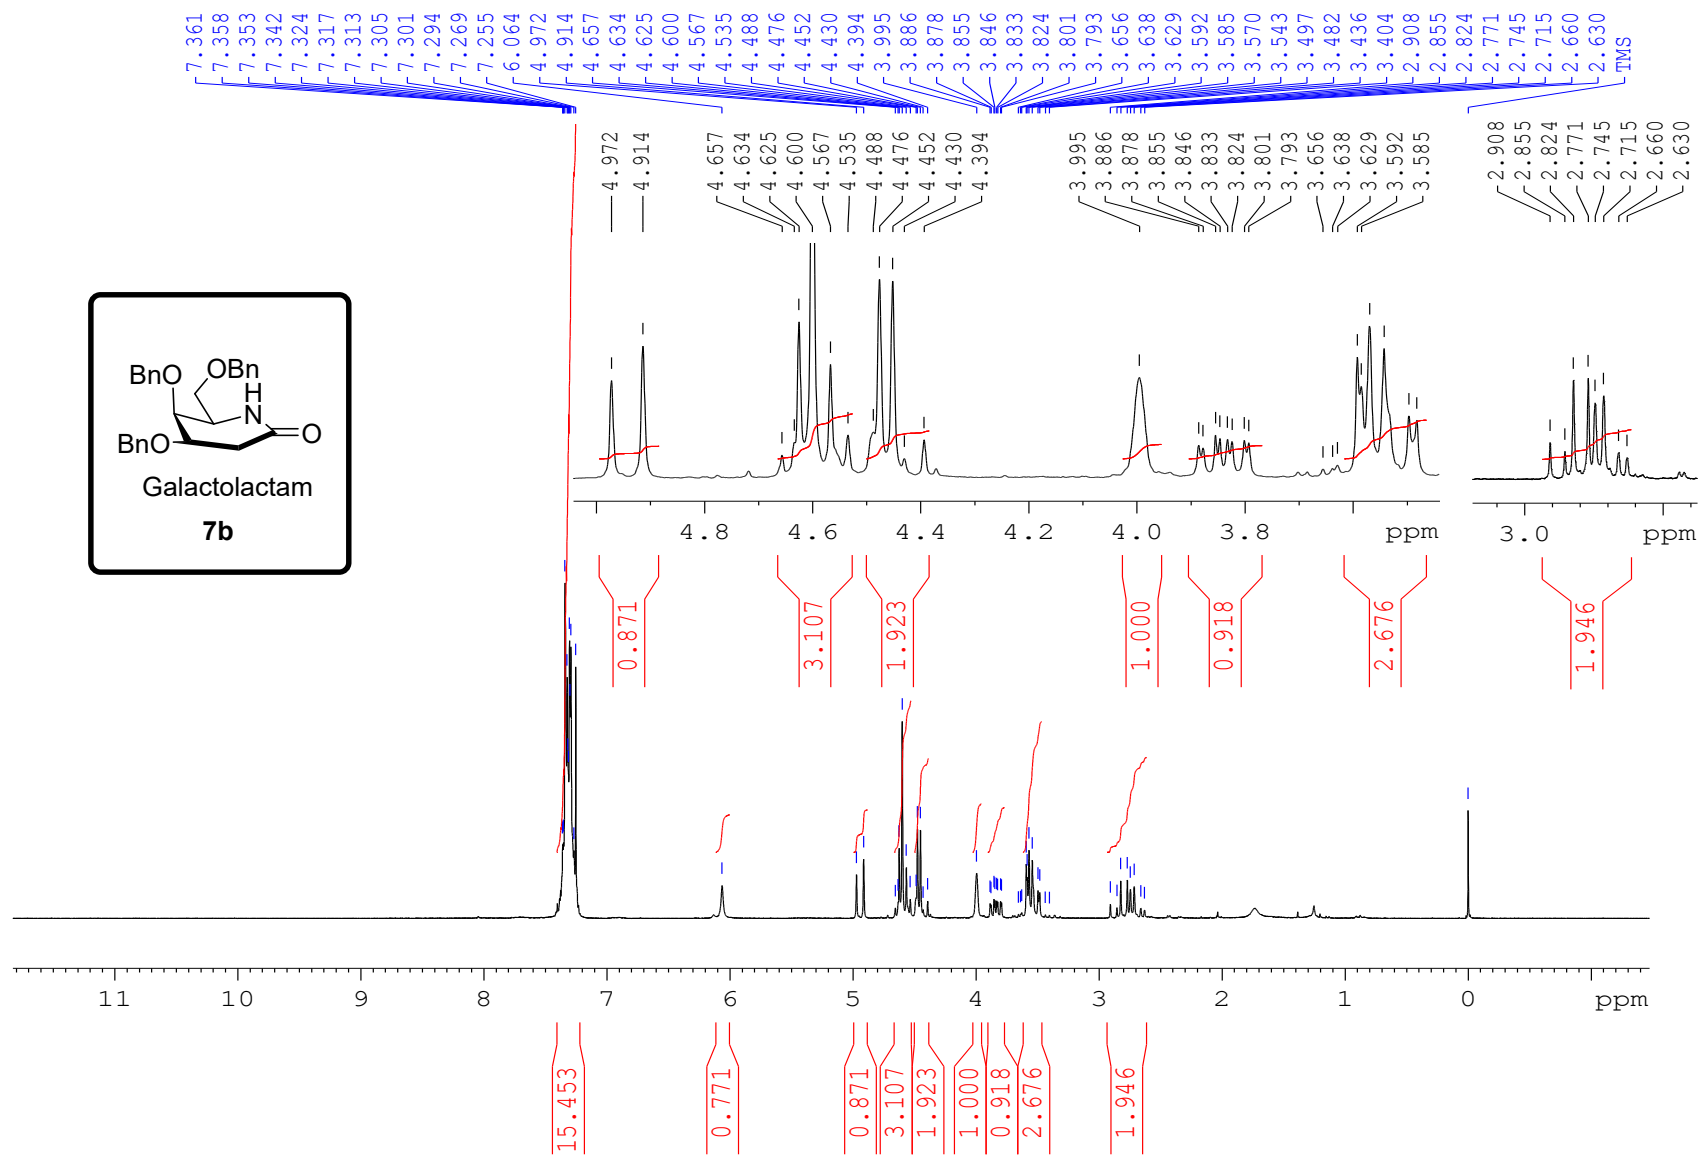

$^{13}\text{C}$  NMR of **7b** (50MHz,  $\text{CDCl}_3$ )

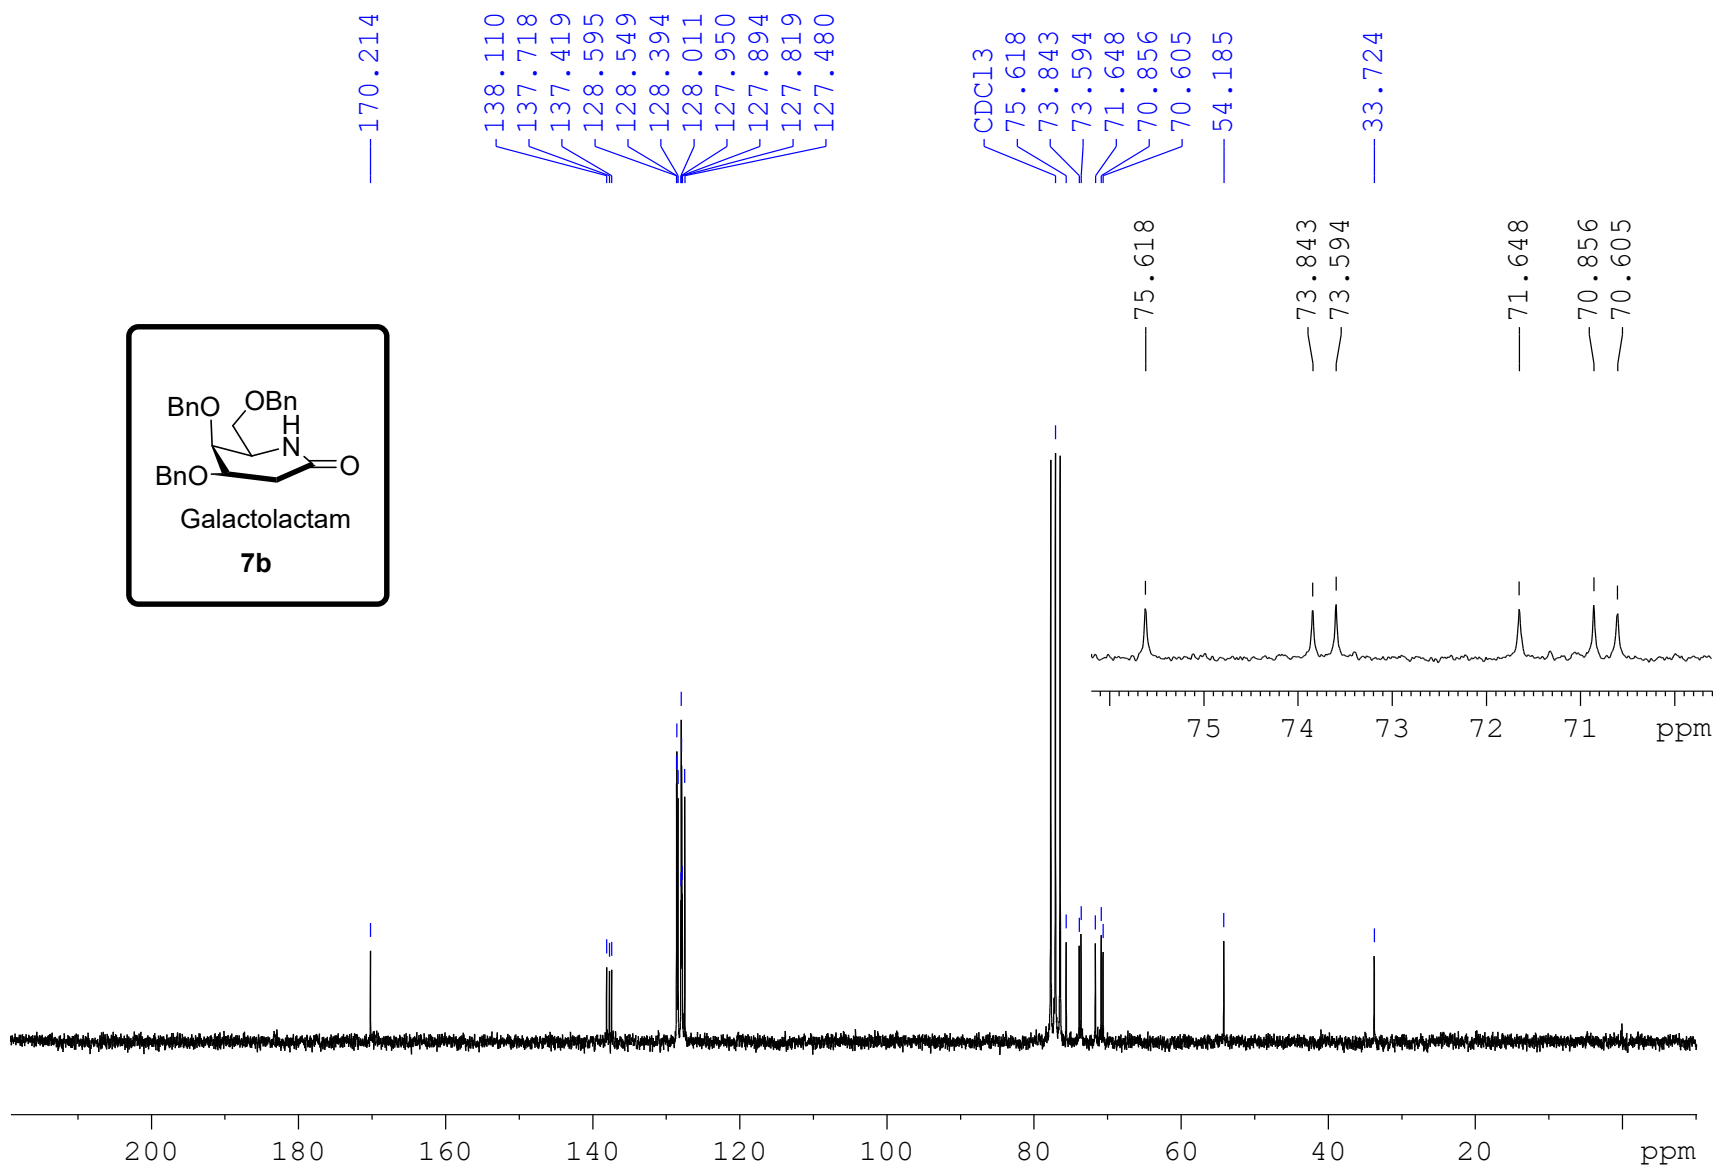

DEPT of **7b** (100MHz, CDCl<sub>3</sub>)

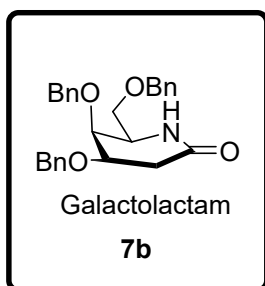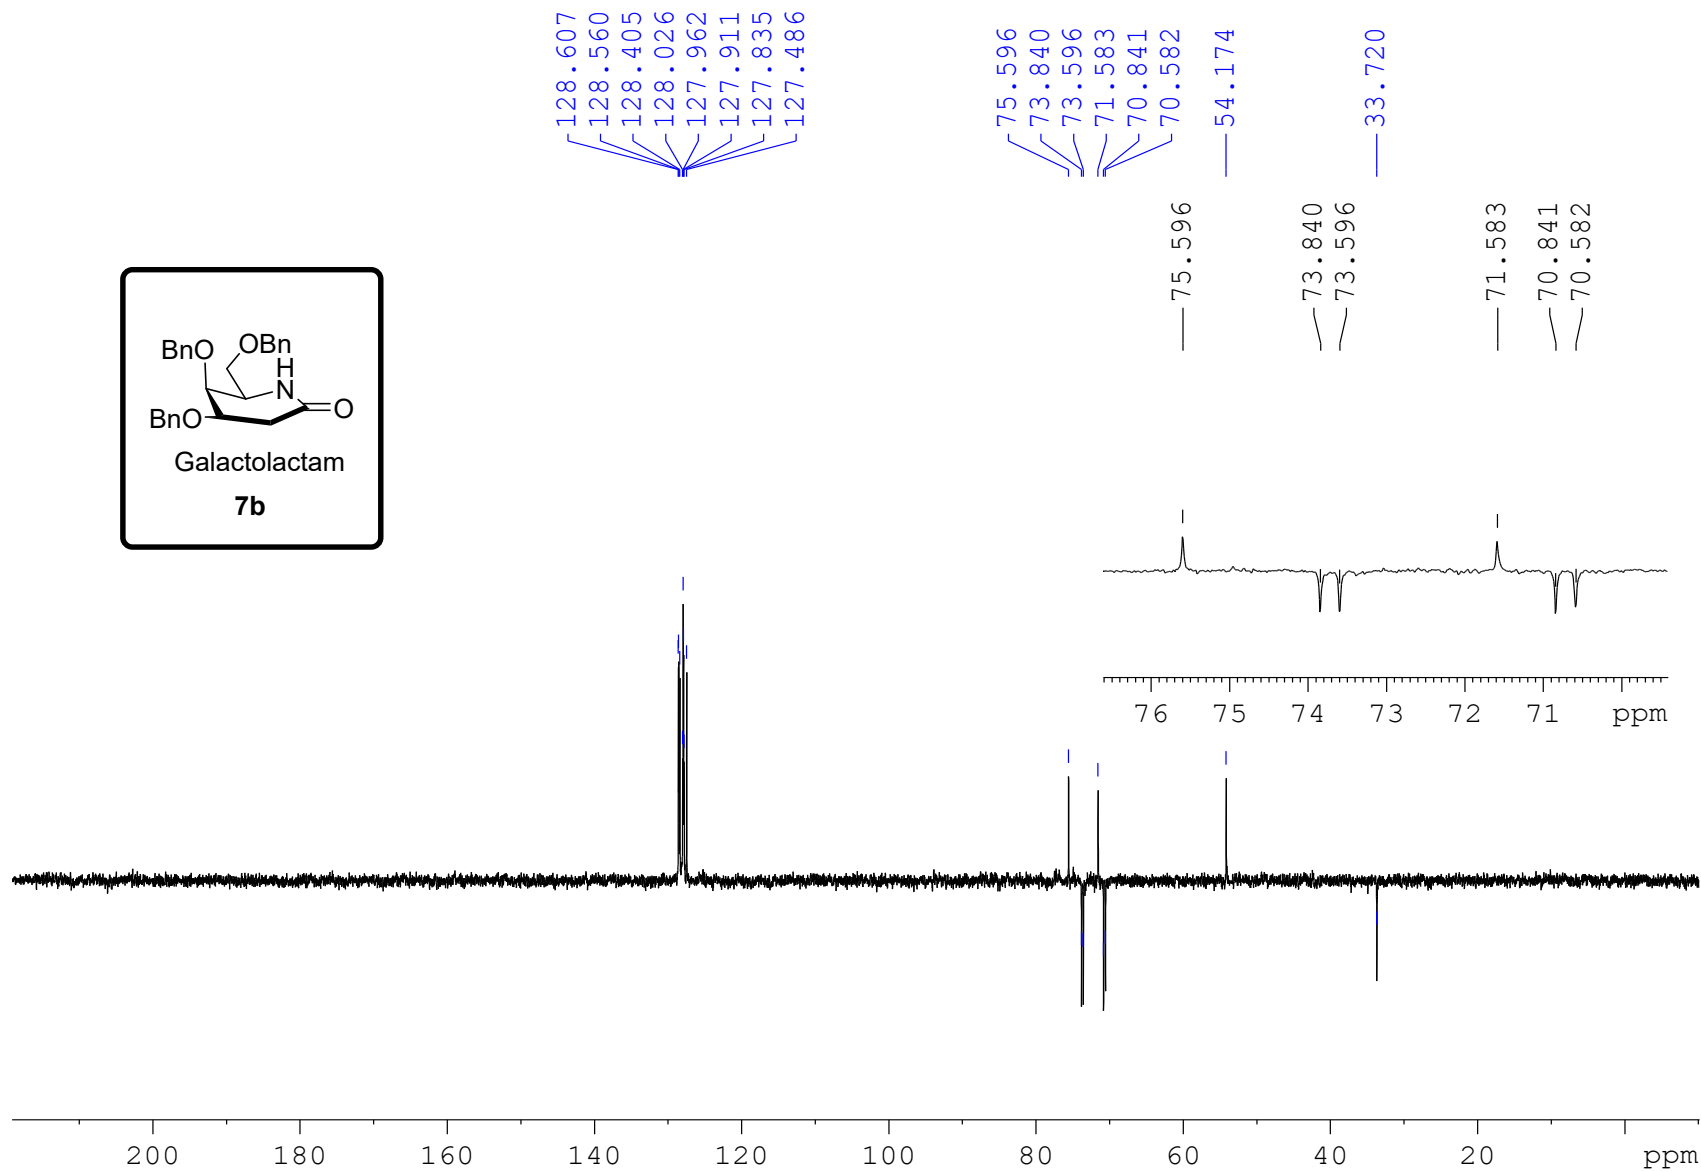

# ESI-MS of 7b

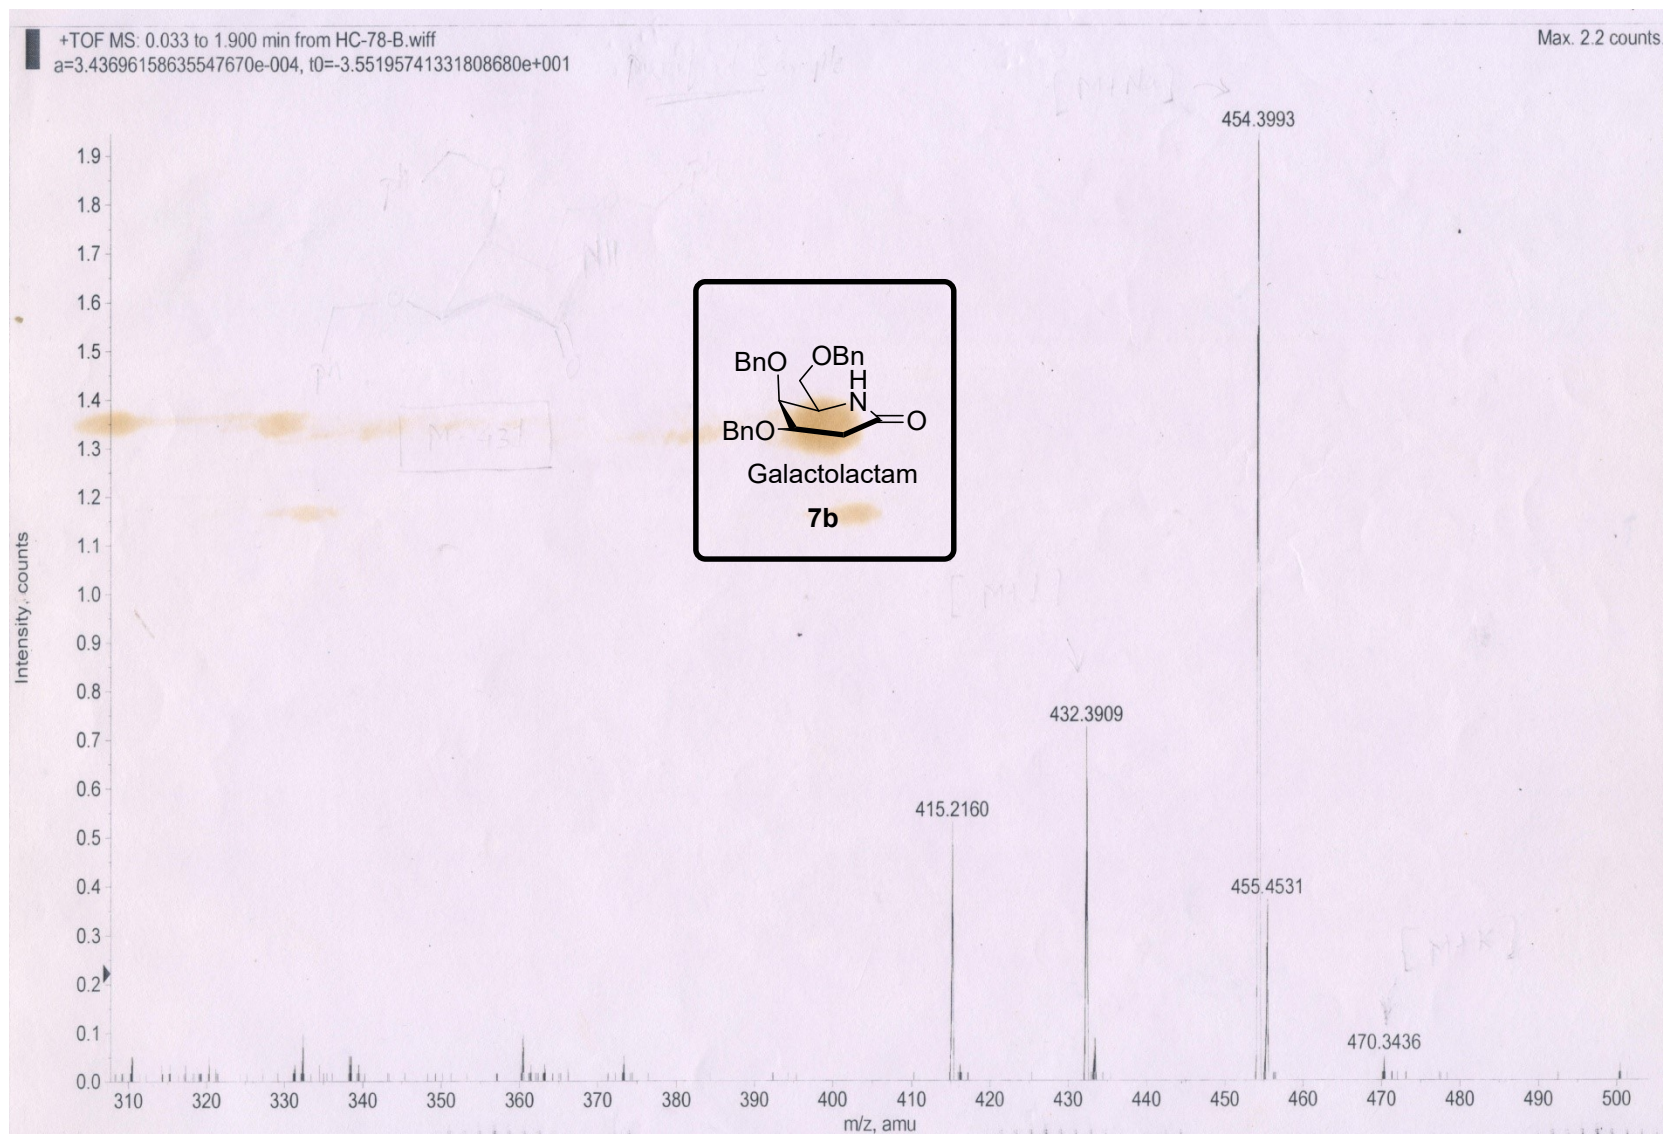

HRMS (ESI) of **7b**

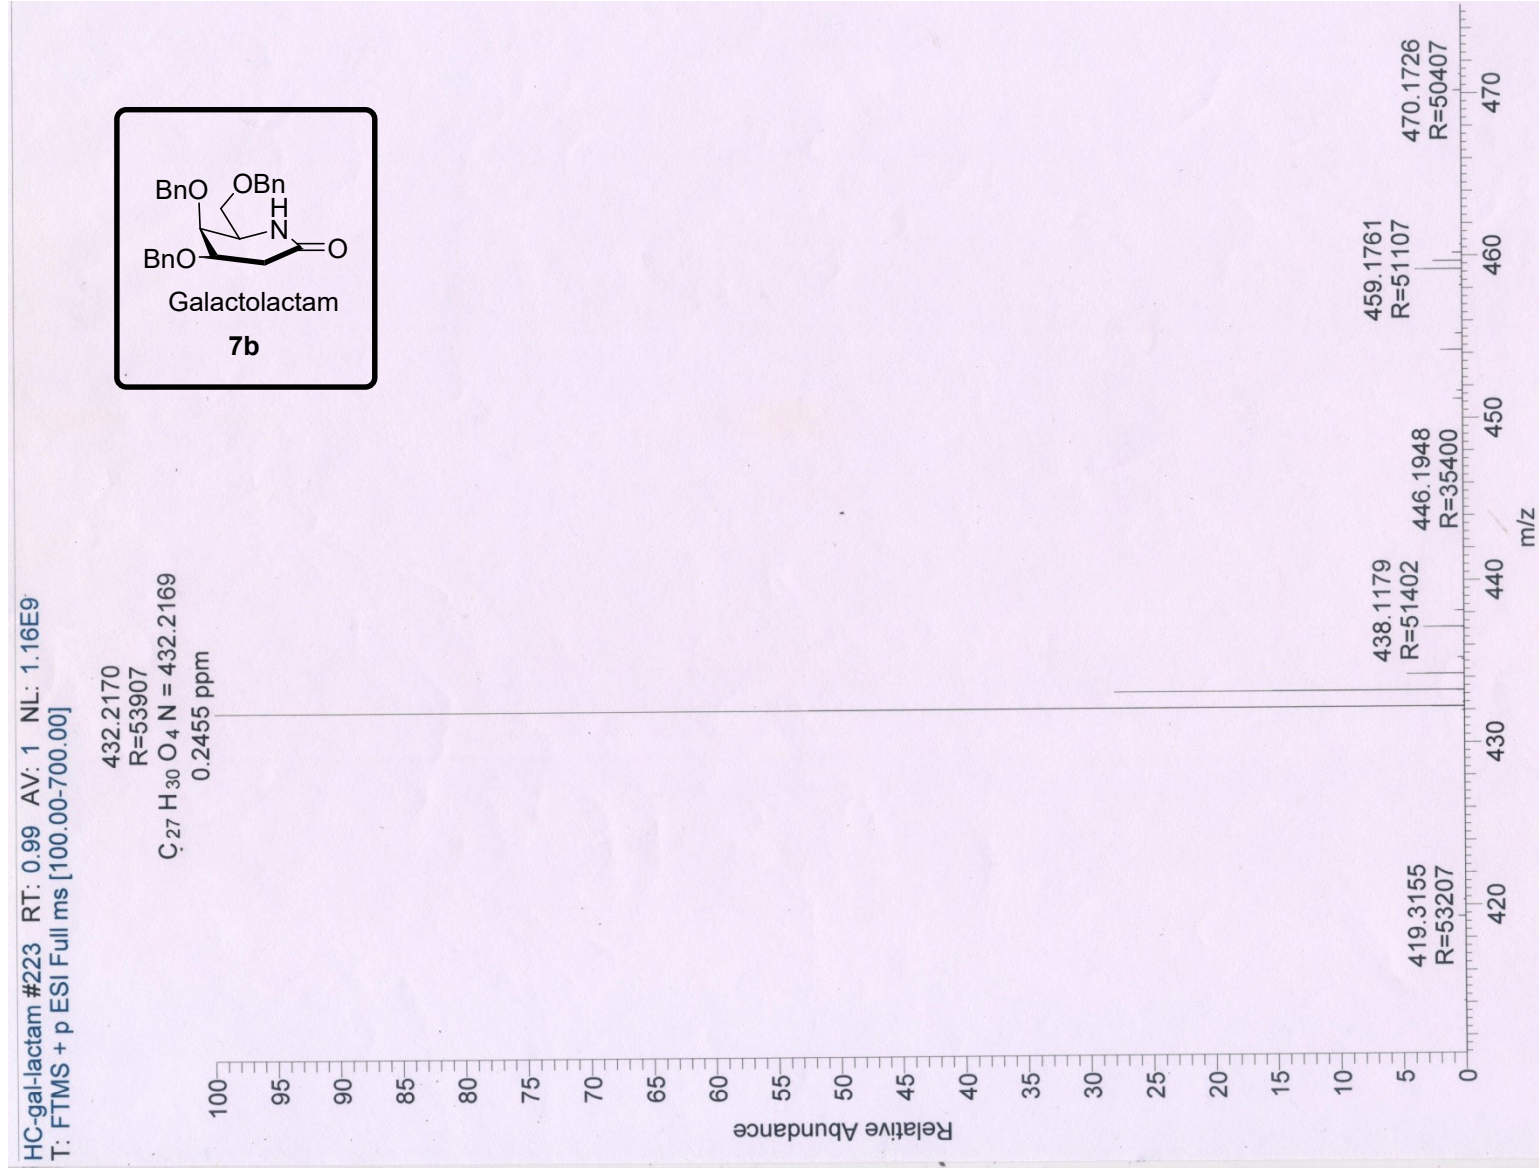

<sup>1</sup>H NMR of **13a** (400MHz, CDCl<sub>3</sub>)

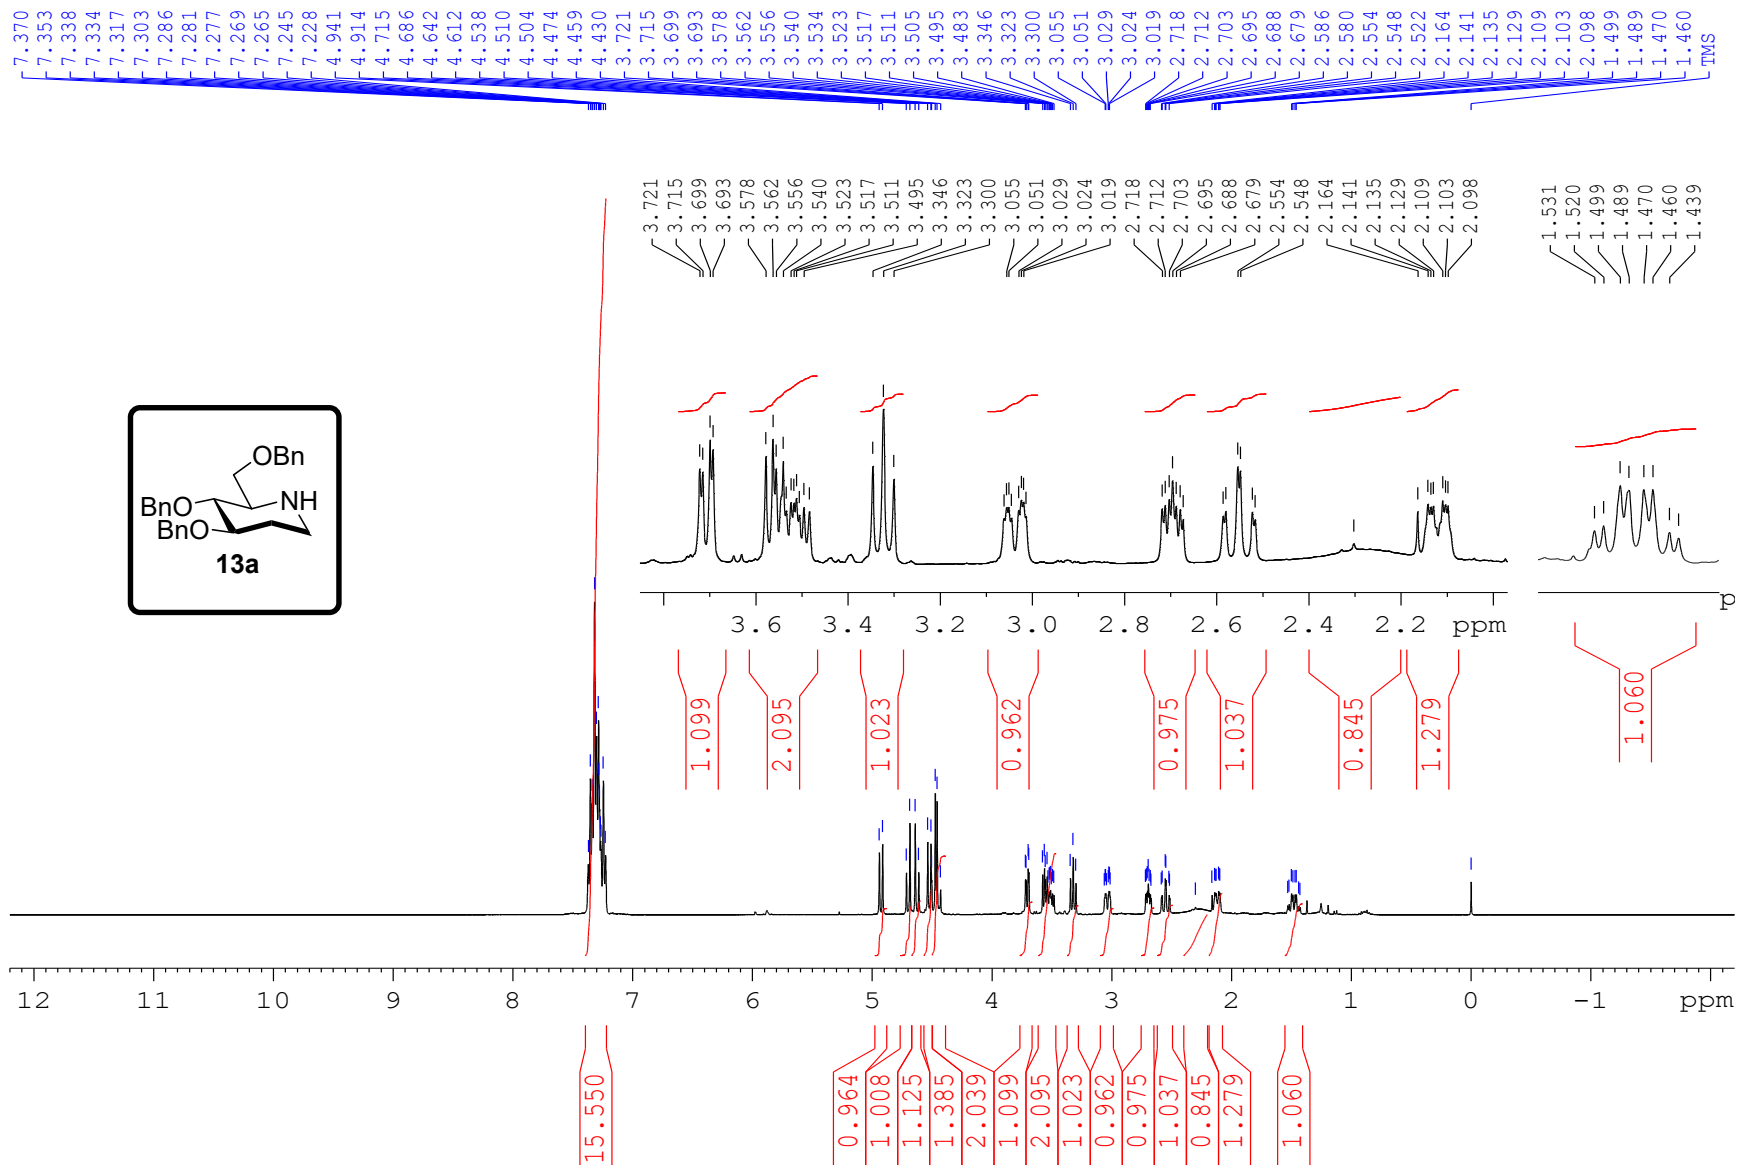

$^{13}\text{C}$  NMR of **13a** in (100 MHz  $\text{CDCl}_3$ )

138.747  
138.601  
138.076  
128.351  
128.322  
128.300  
128.044  
127.821  
127.655  
127.612  
127.554  
127.469  
82.430  
80.676  
 $\text{CDCl}_3$   
75.078  
73.335  
71.459  
70.581  
60.022  
43.510  
31.996

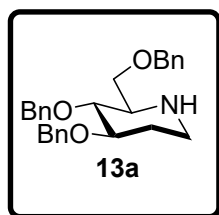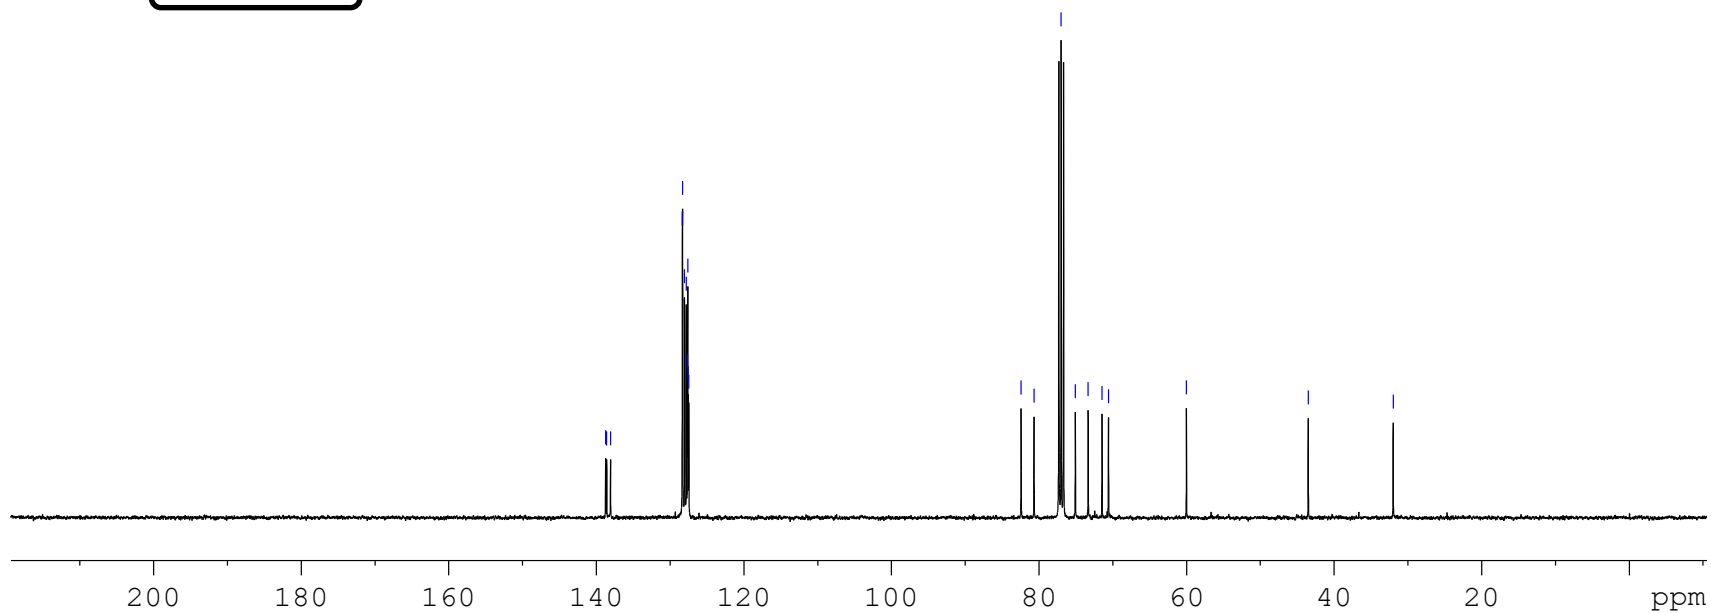



DEPT of **11'a** in (100 MHz CDCl<sub>3</sub>)

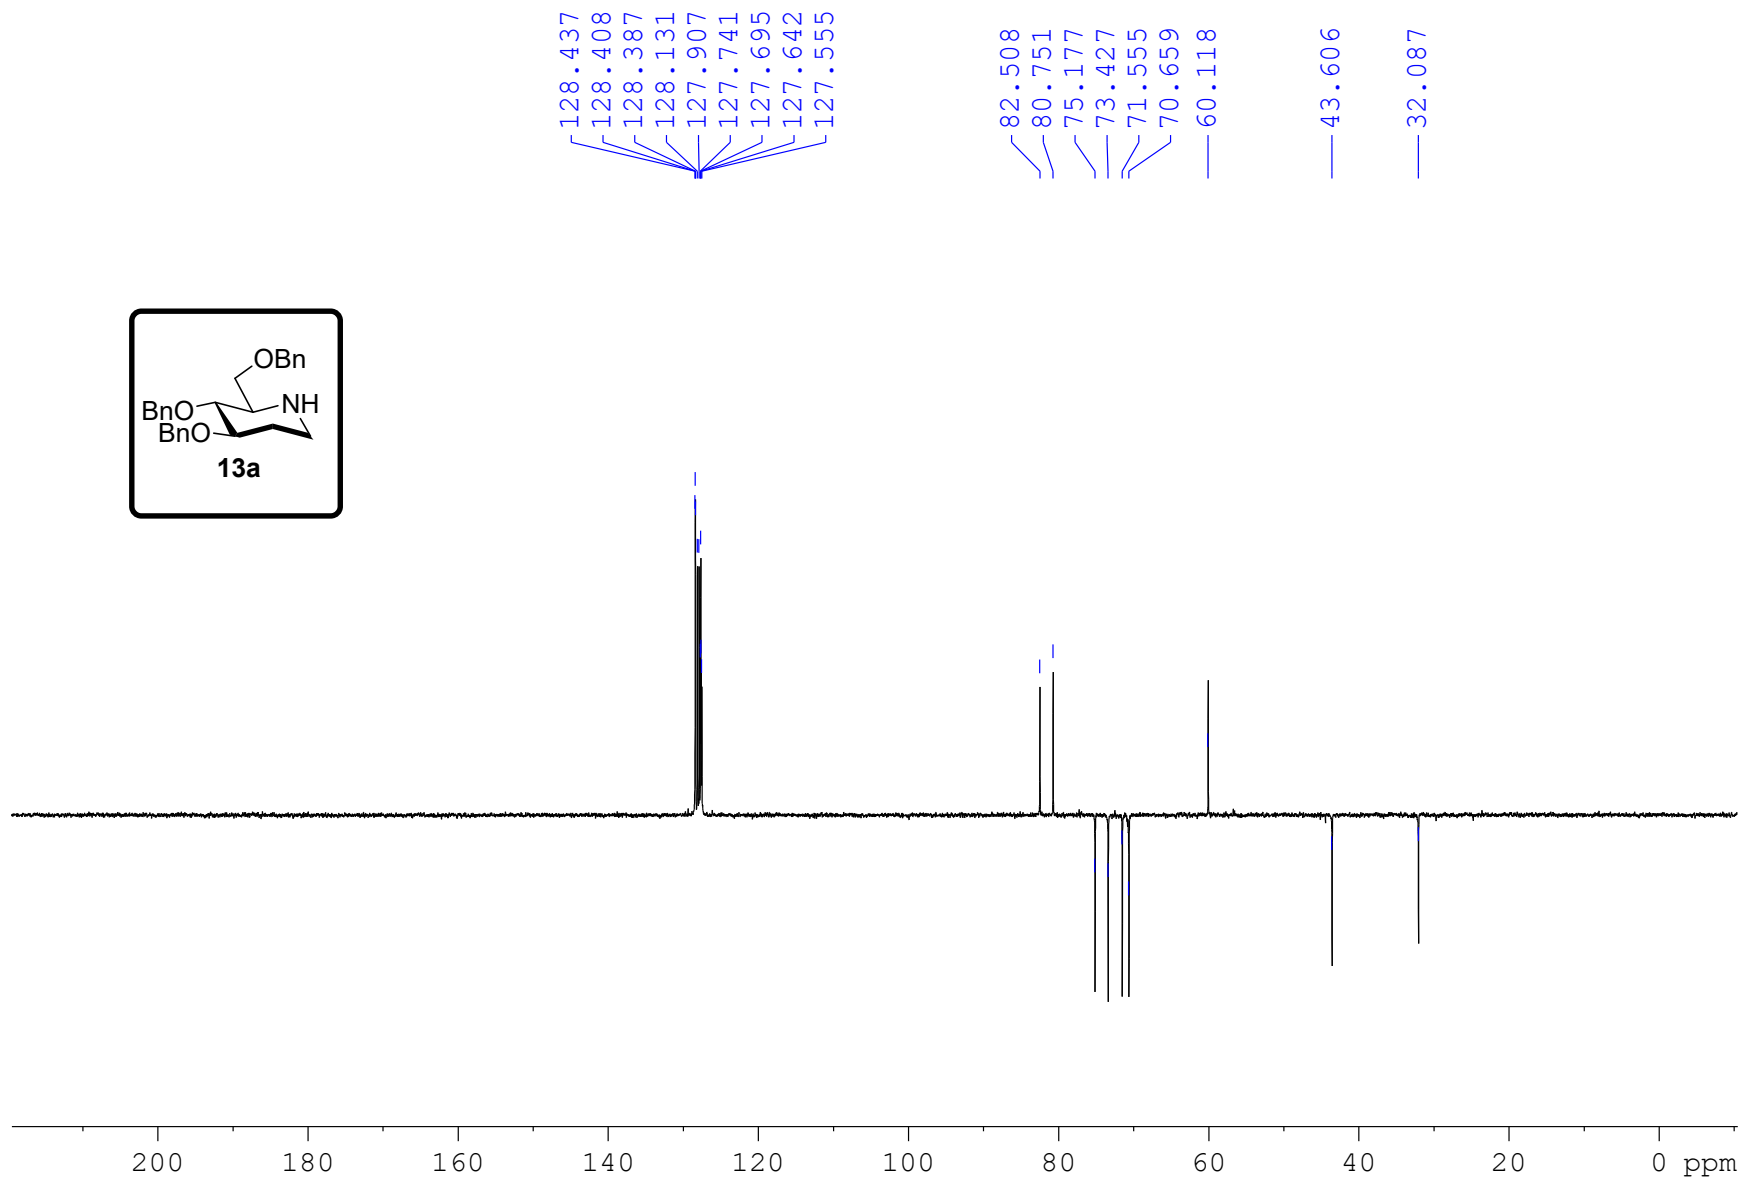

$^1\text{H}$ - $^1\text{H}$  COSY of **13a** (400MHz,  $\text{CDCl}_3$ , 298 K)

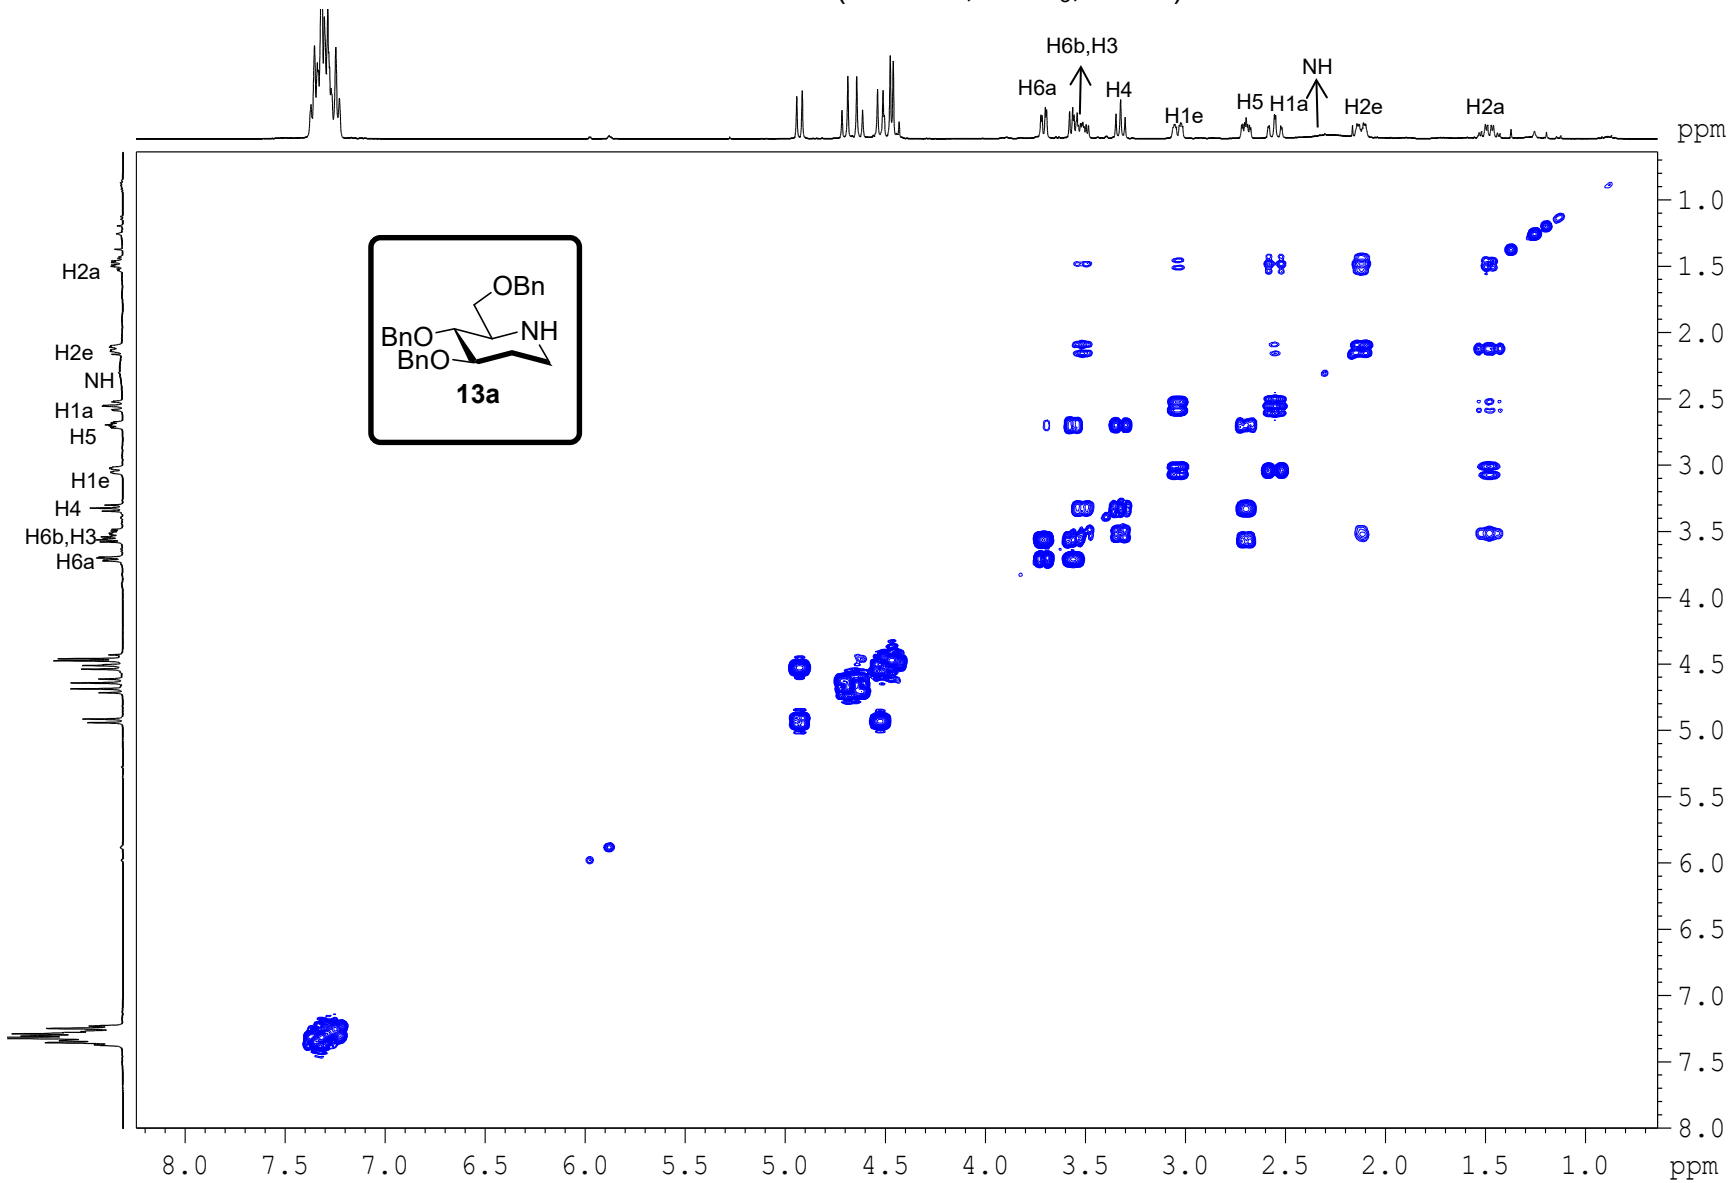

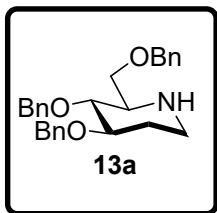

$^1\text{H}$ - $^1\text{H}$  COSY offset of **13a** (400MHz,  $\text{CDCl}_3$ , 298 K)

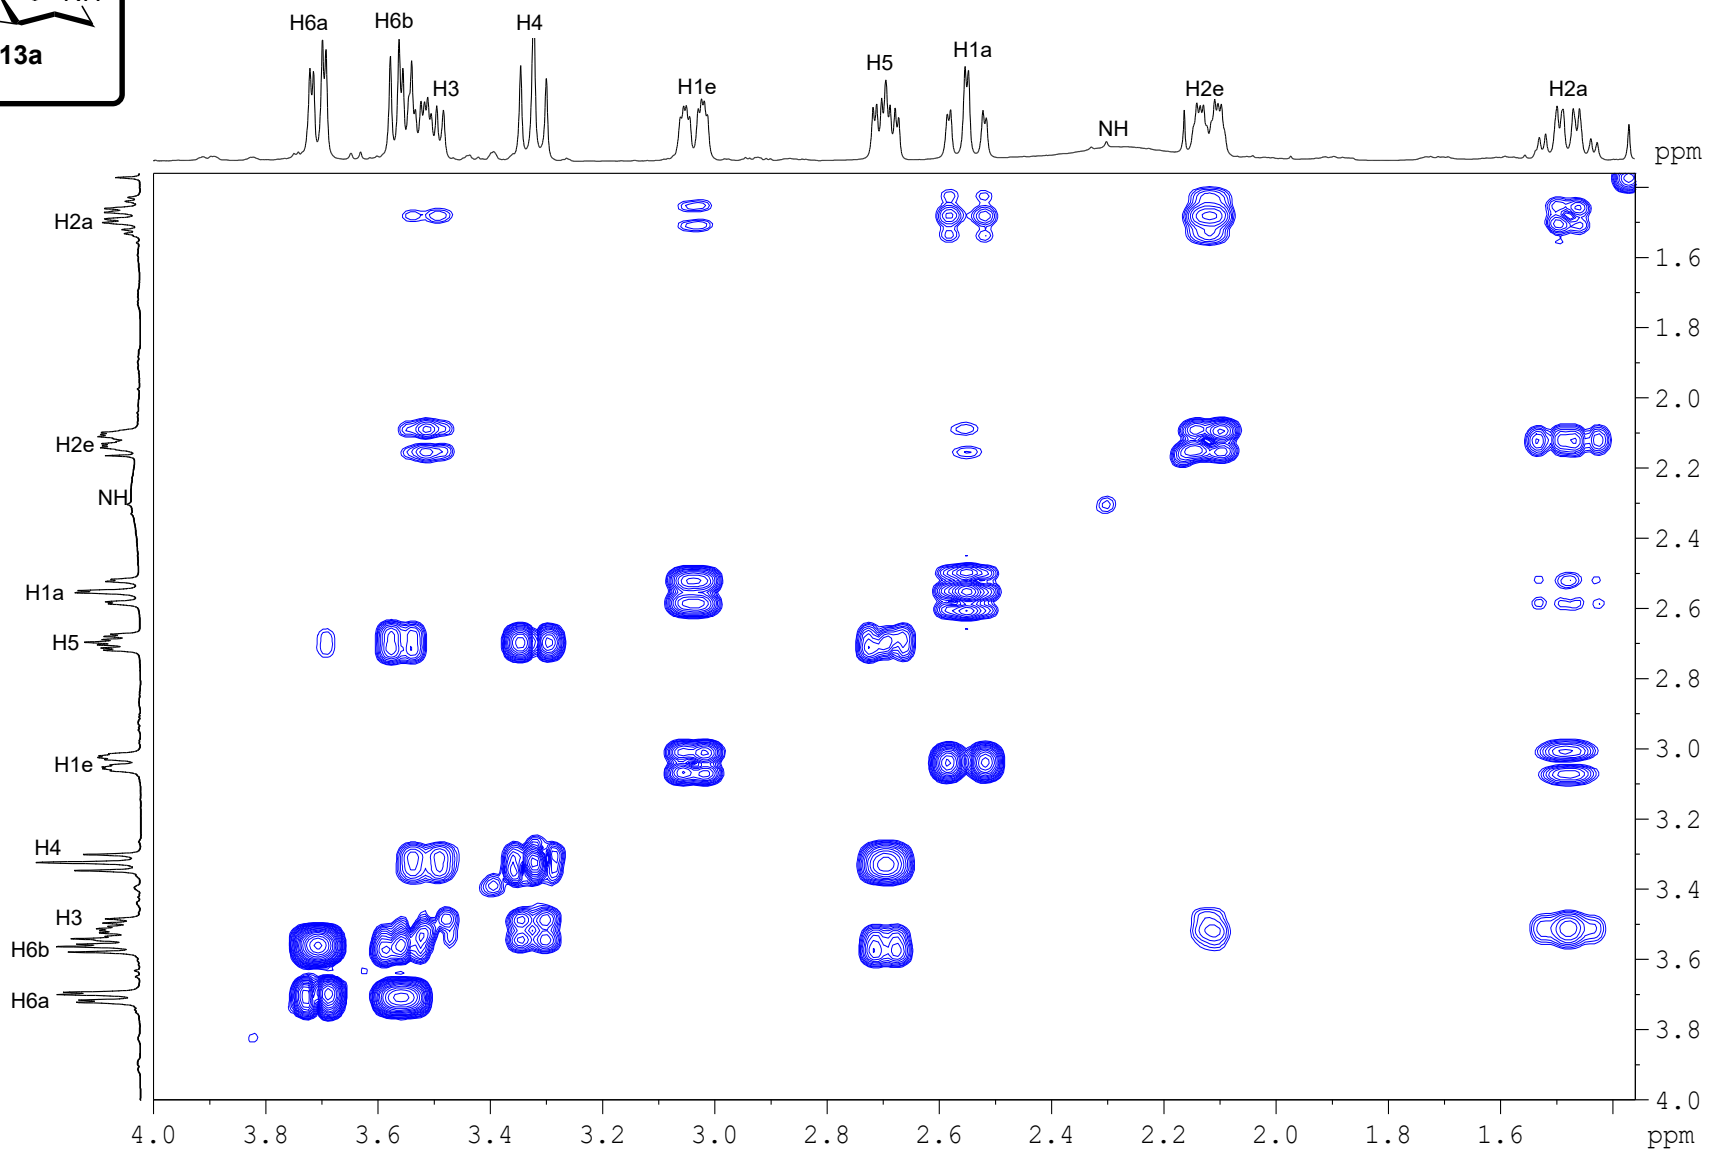

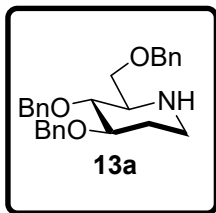

HSQC of **13a** (400MHz, CDCl<sub>3</sub>, 298 K)

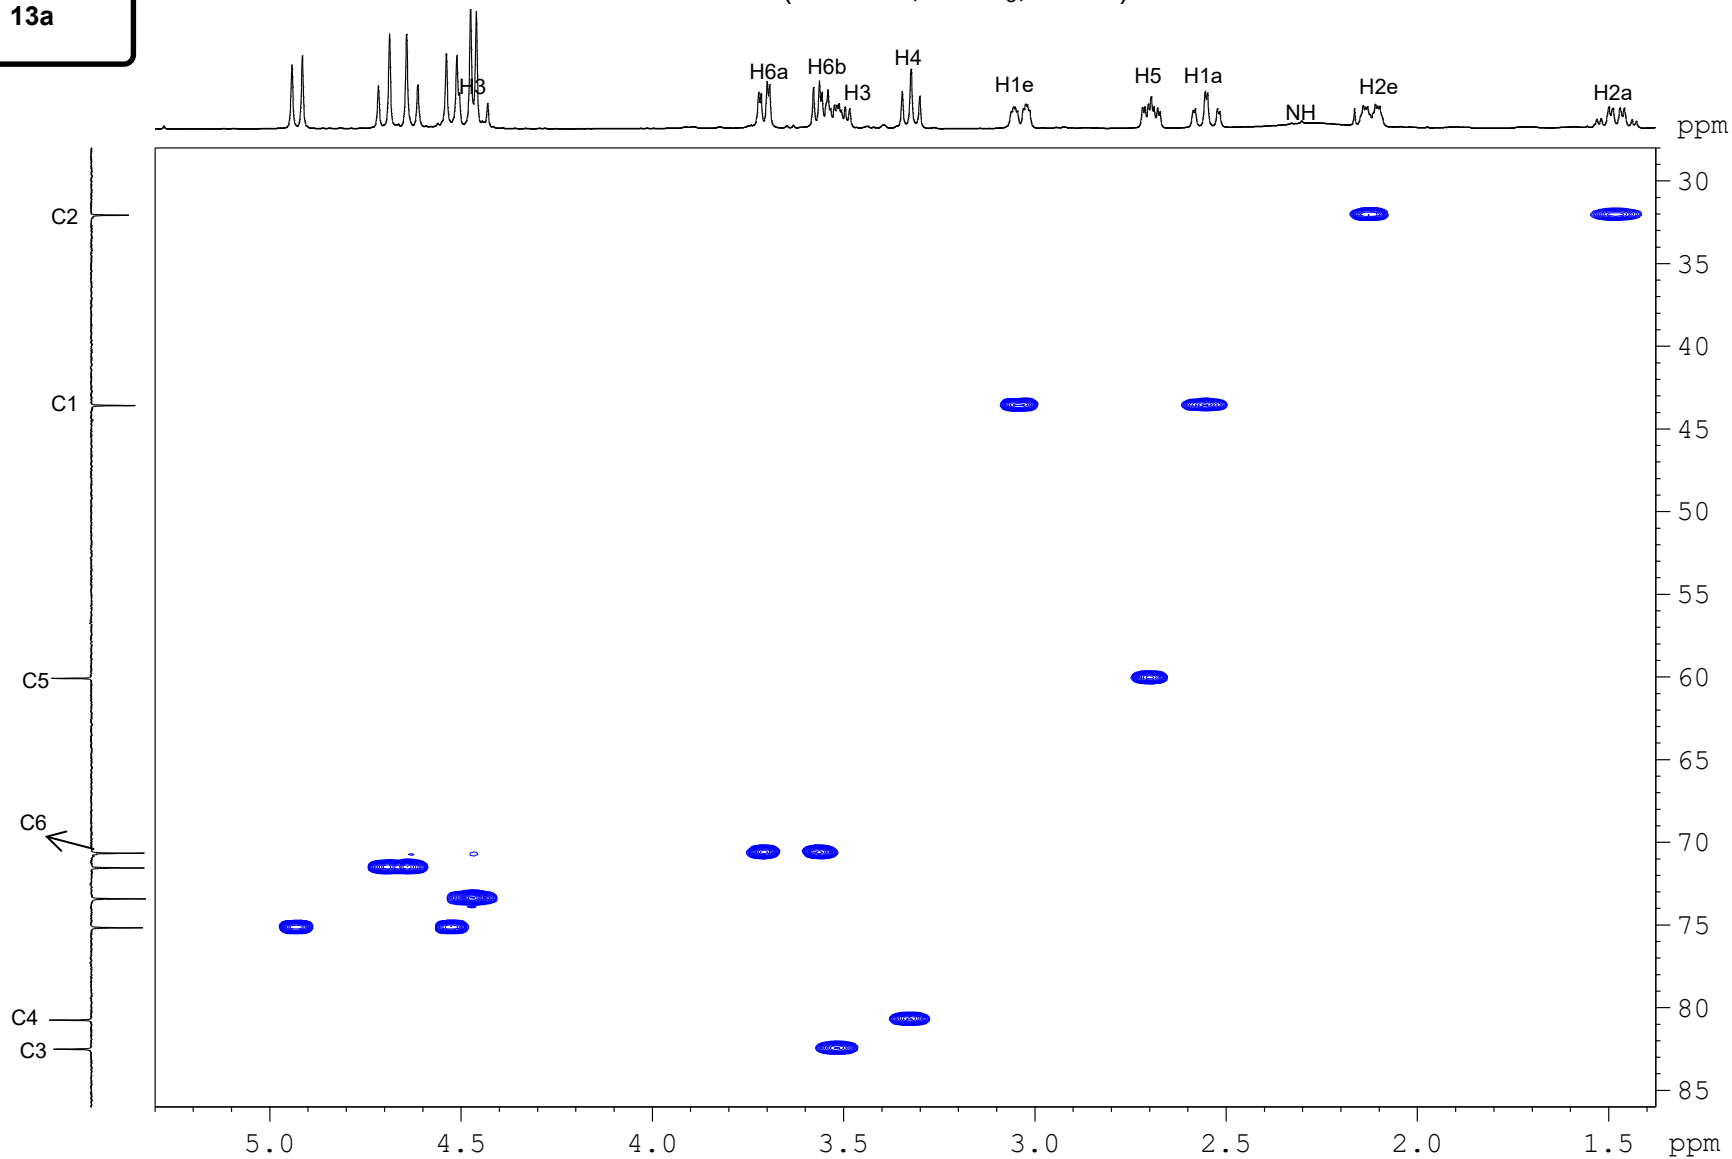

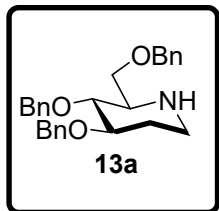

HMBC **13a** (400MHz, CDCl<sub>3</sub>, 298 K)

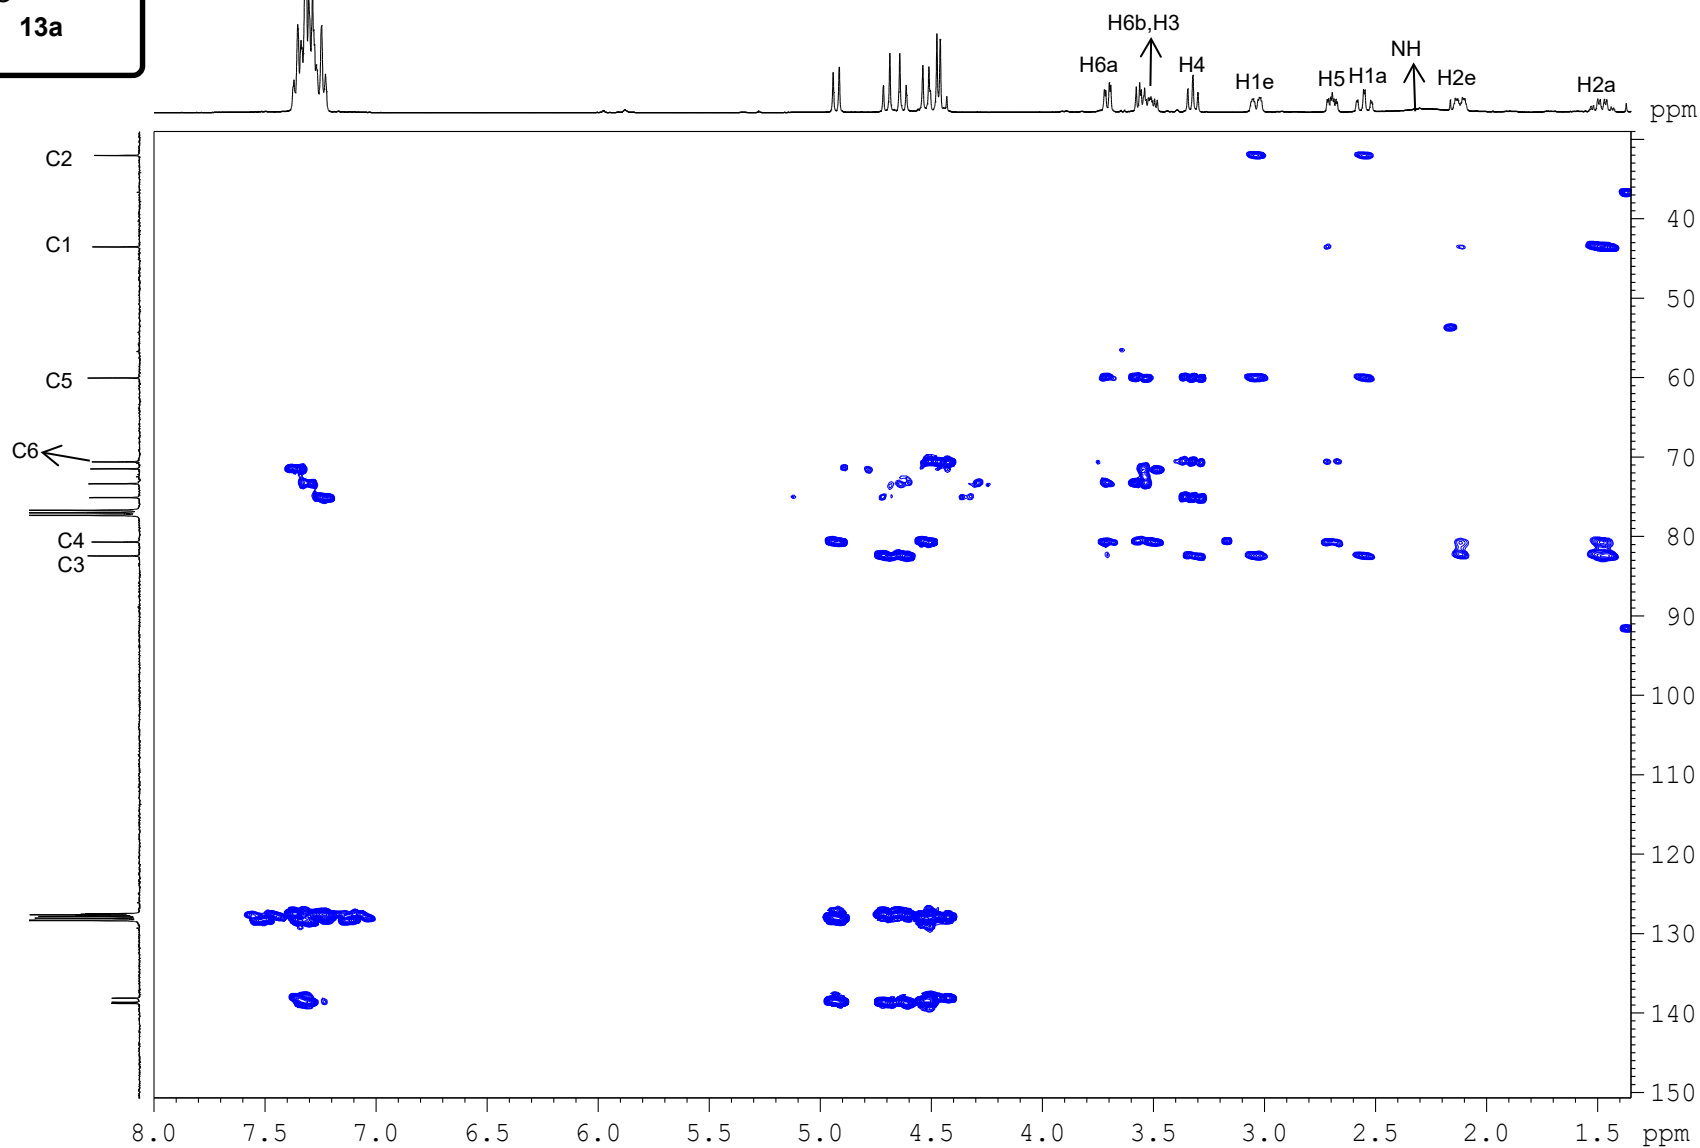

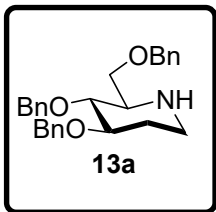

NOESY of **13a** (400MHz, CDCl<sub>3</sub>, 298 K)

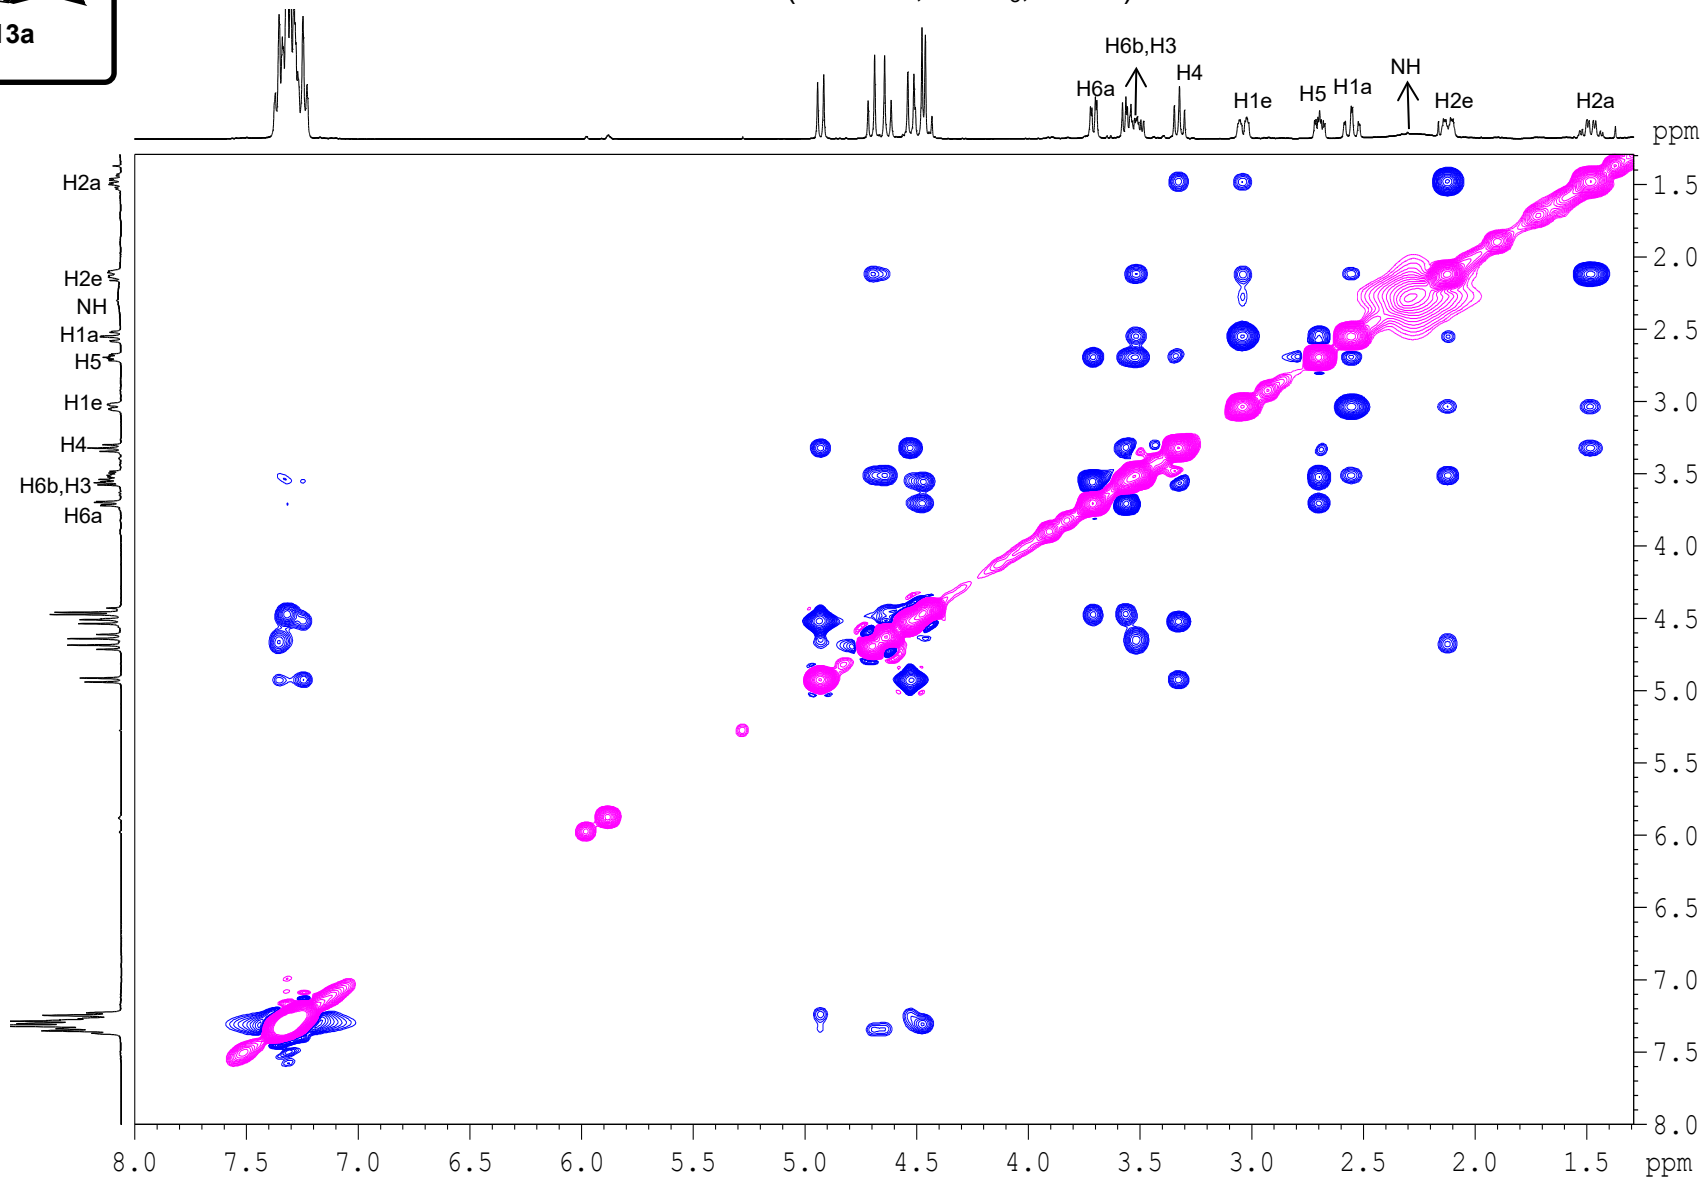

# ESI-MS of 13a

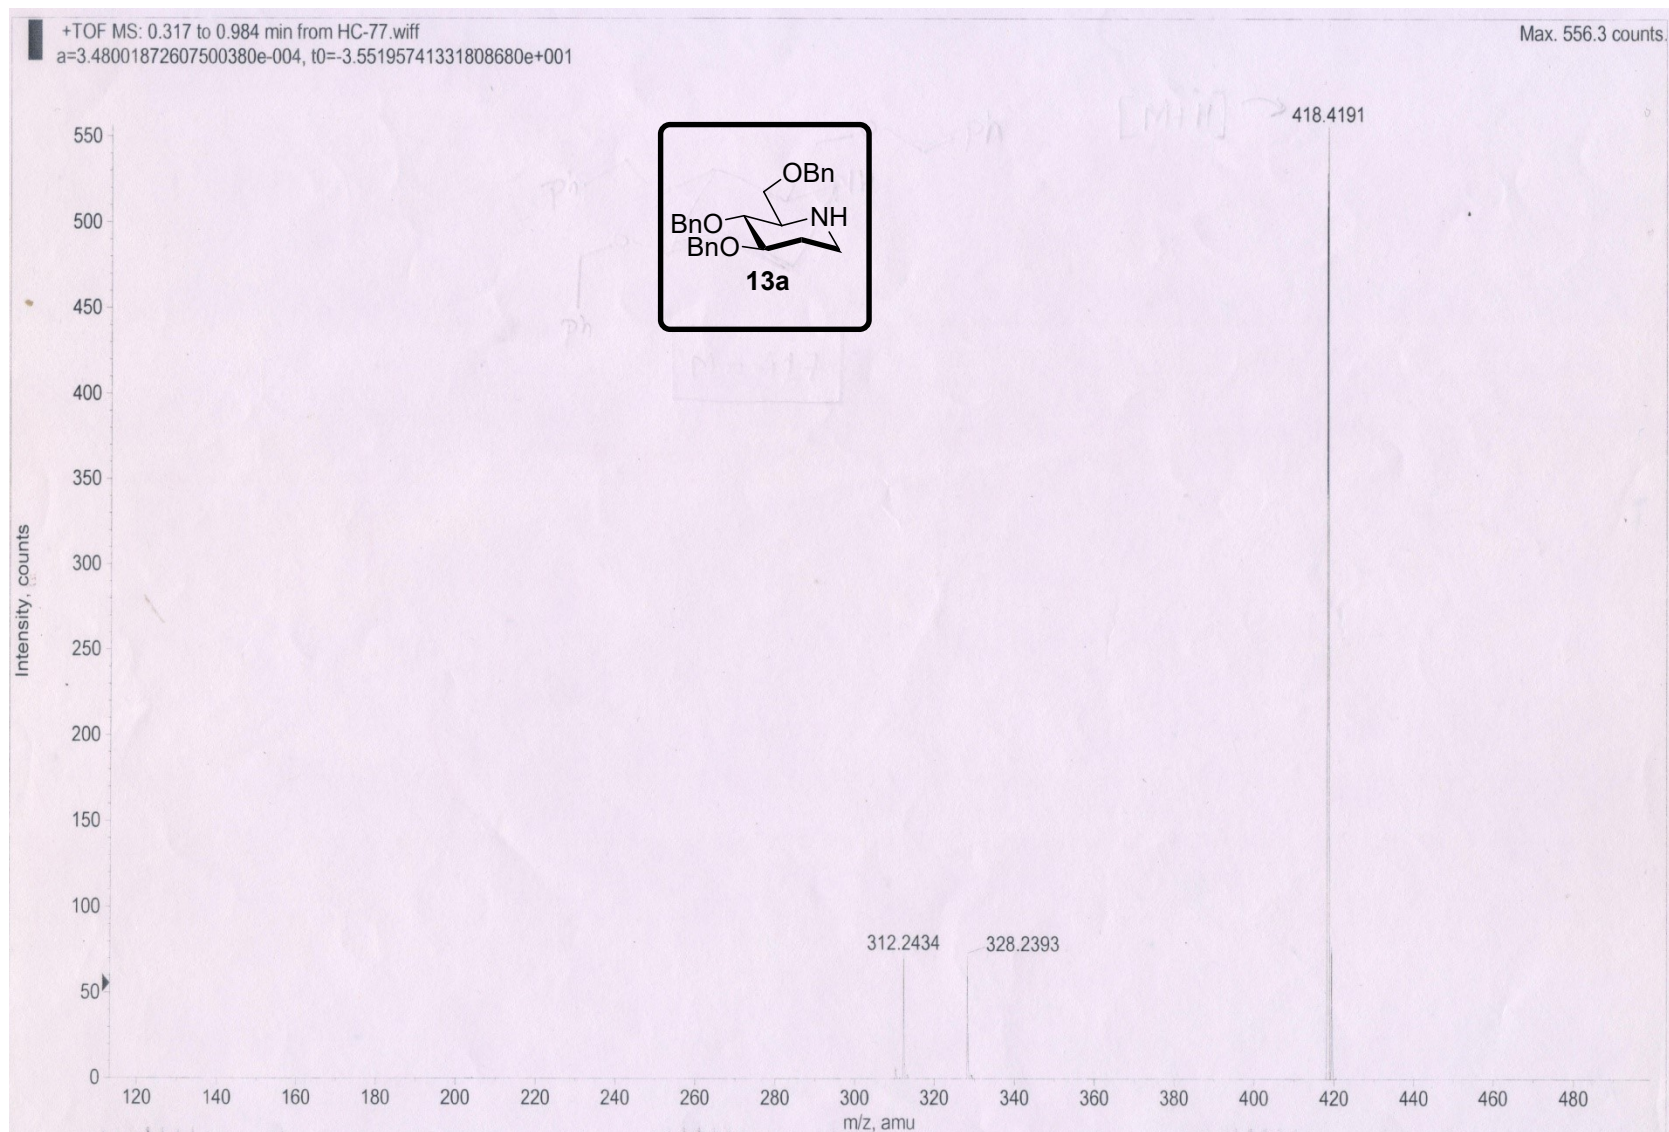

# HRMS (ESI) of 13a

HC77 #472 RT: 2.10 AV: 1 NL: 2.00E9  
T: FTMS + p ESI Full ms [100.00-700.00]

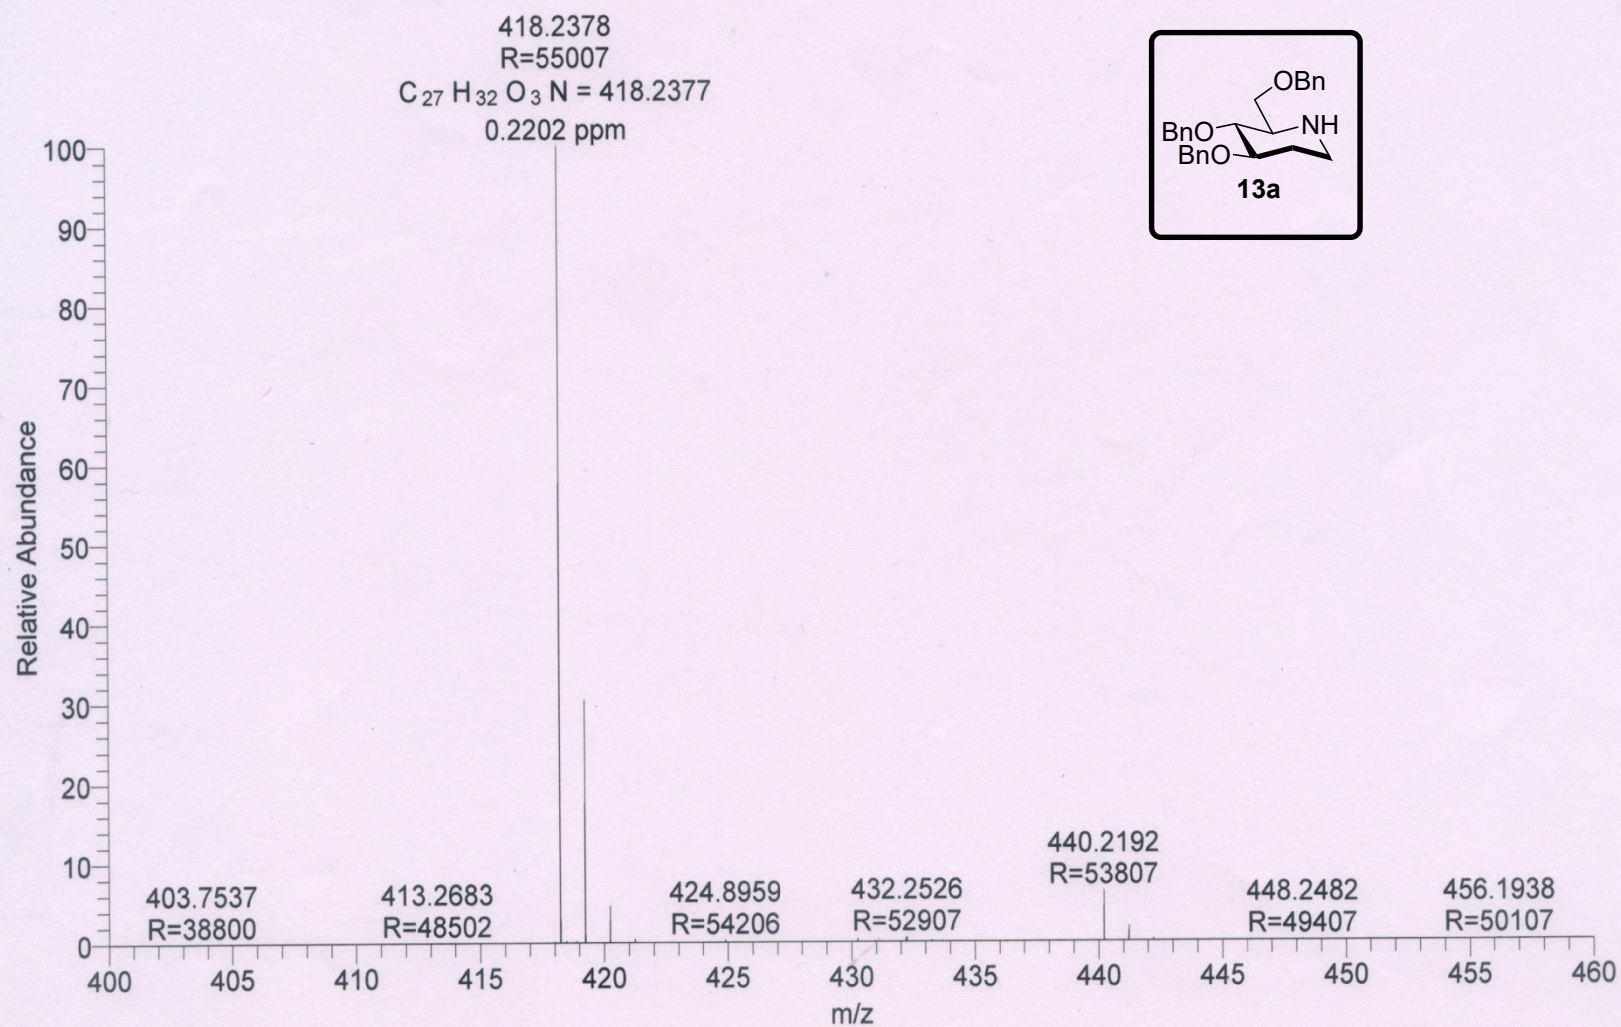



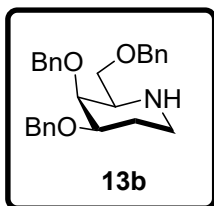

<sup>1</sup>H NMR of **13b** (400 MHz CDCl<sub>3</sub>)

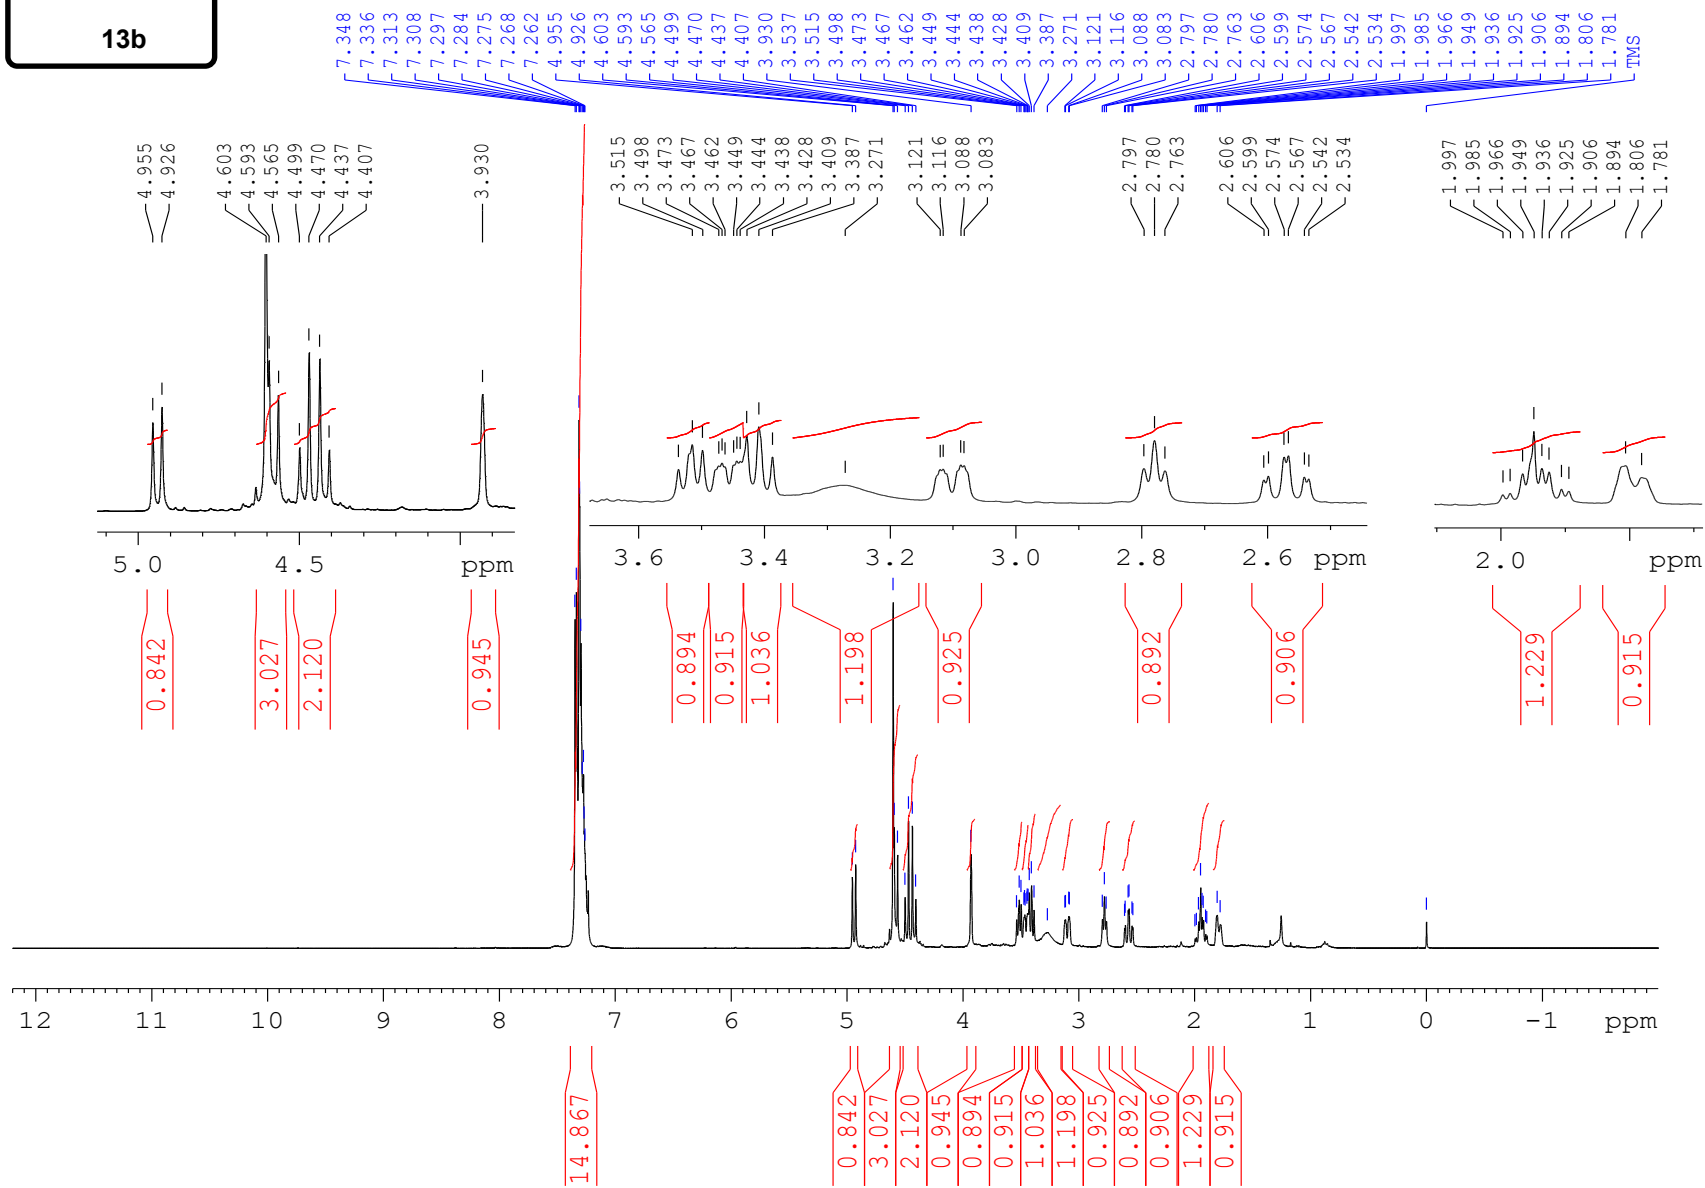

<sup>13</sup>C NMR of **13b** (100 MHz CDCl<sub>3</sub>)

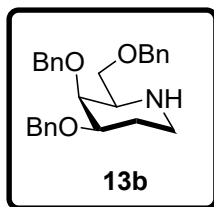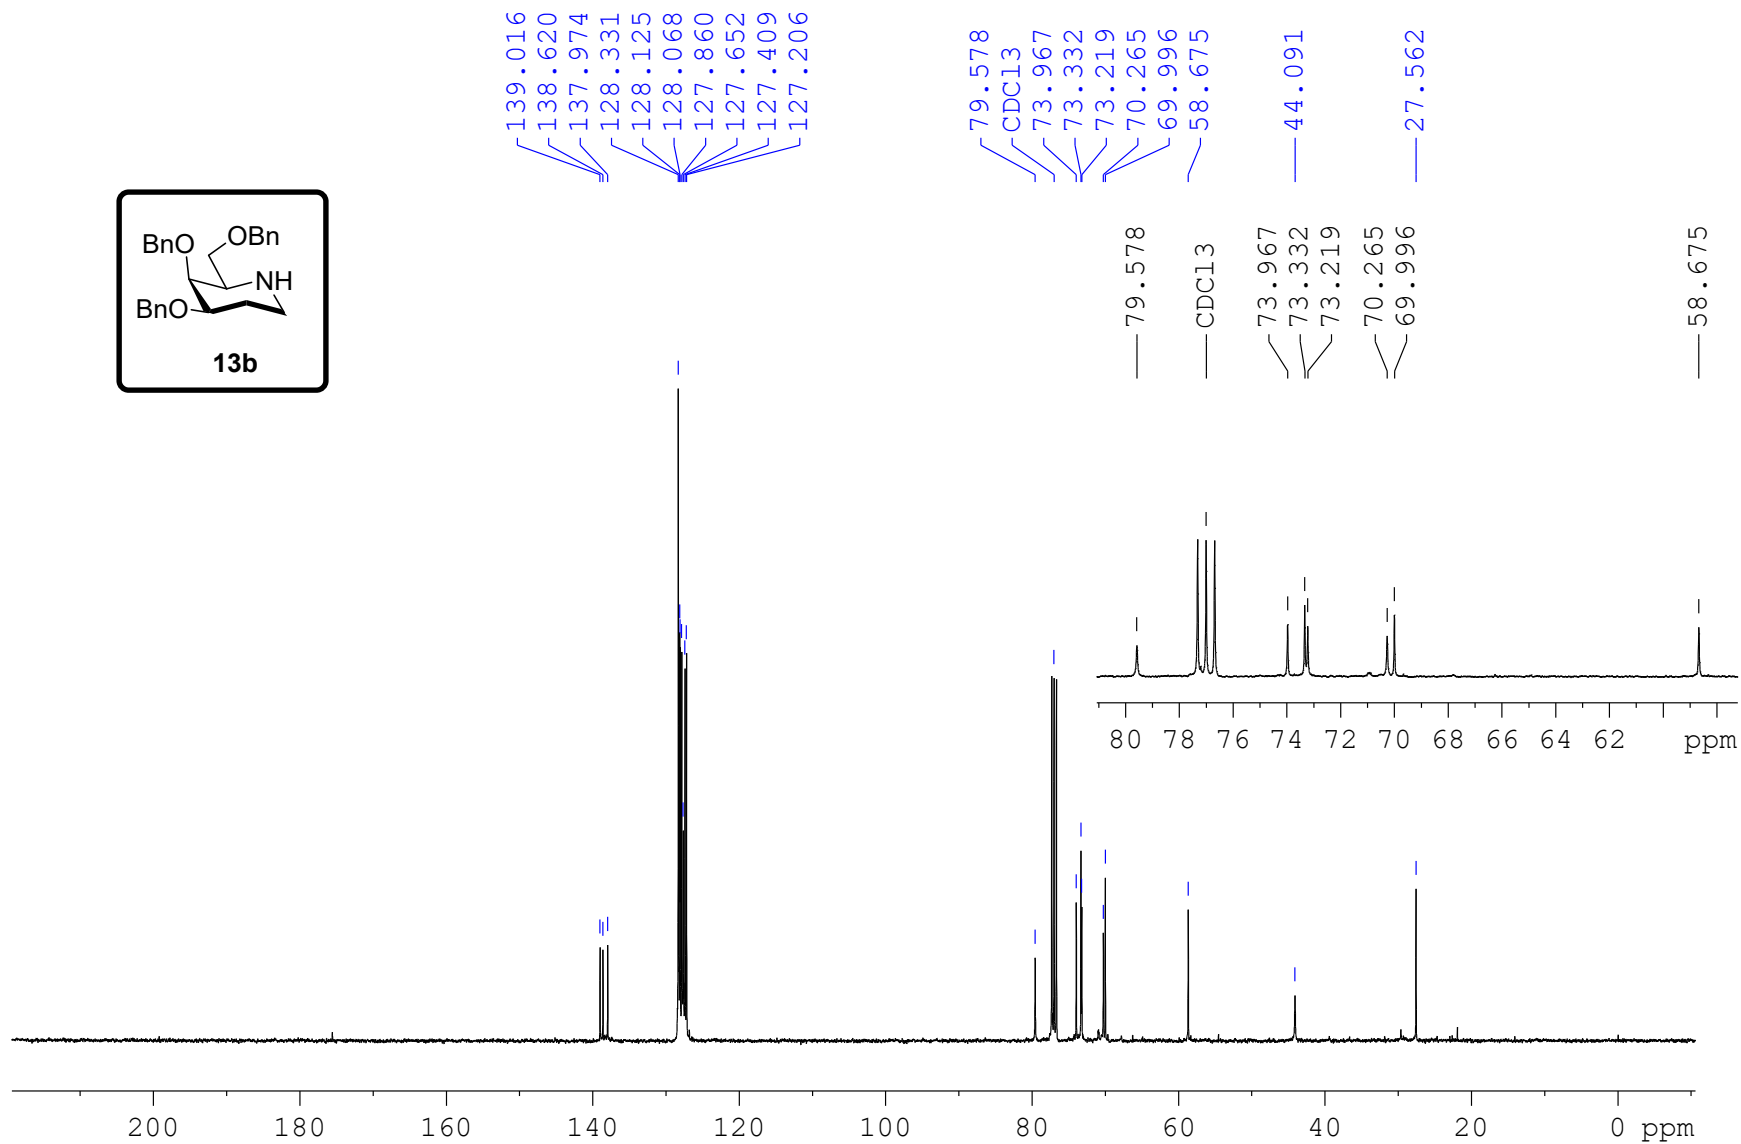

DEPT of **13b** (100 MHz CDCl<sub>3</sub>)

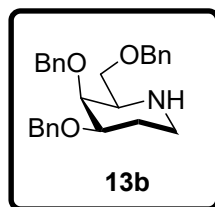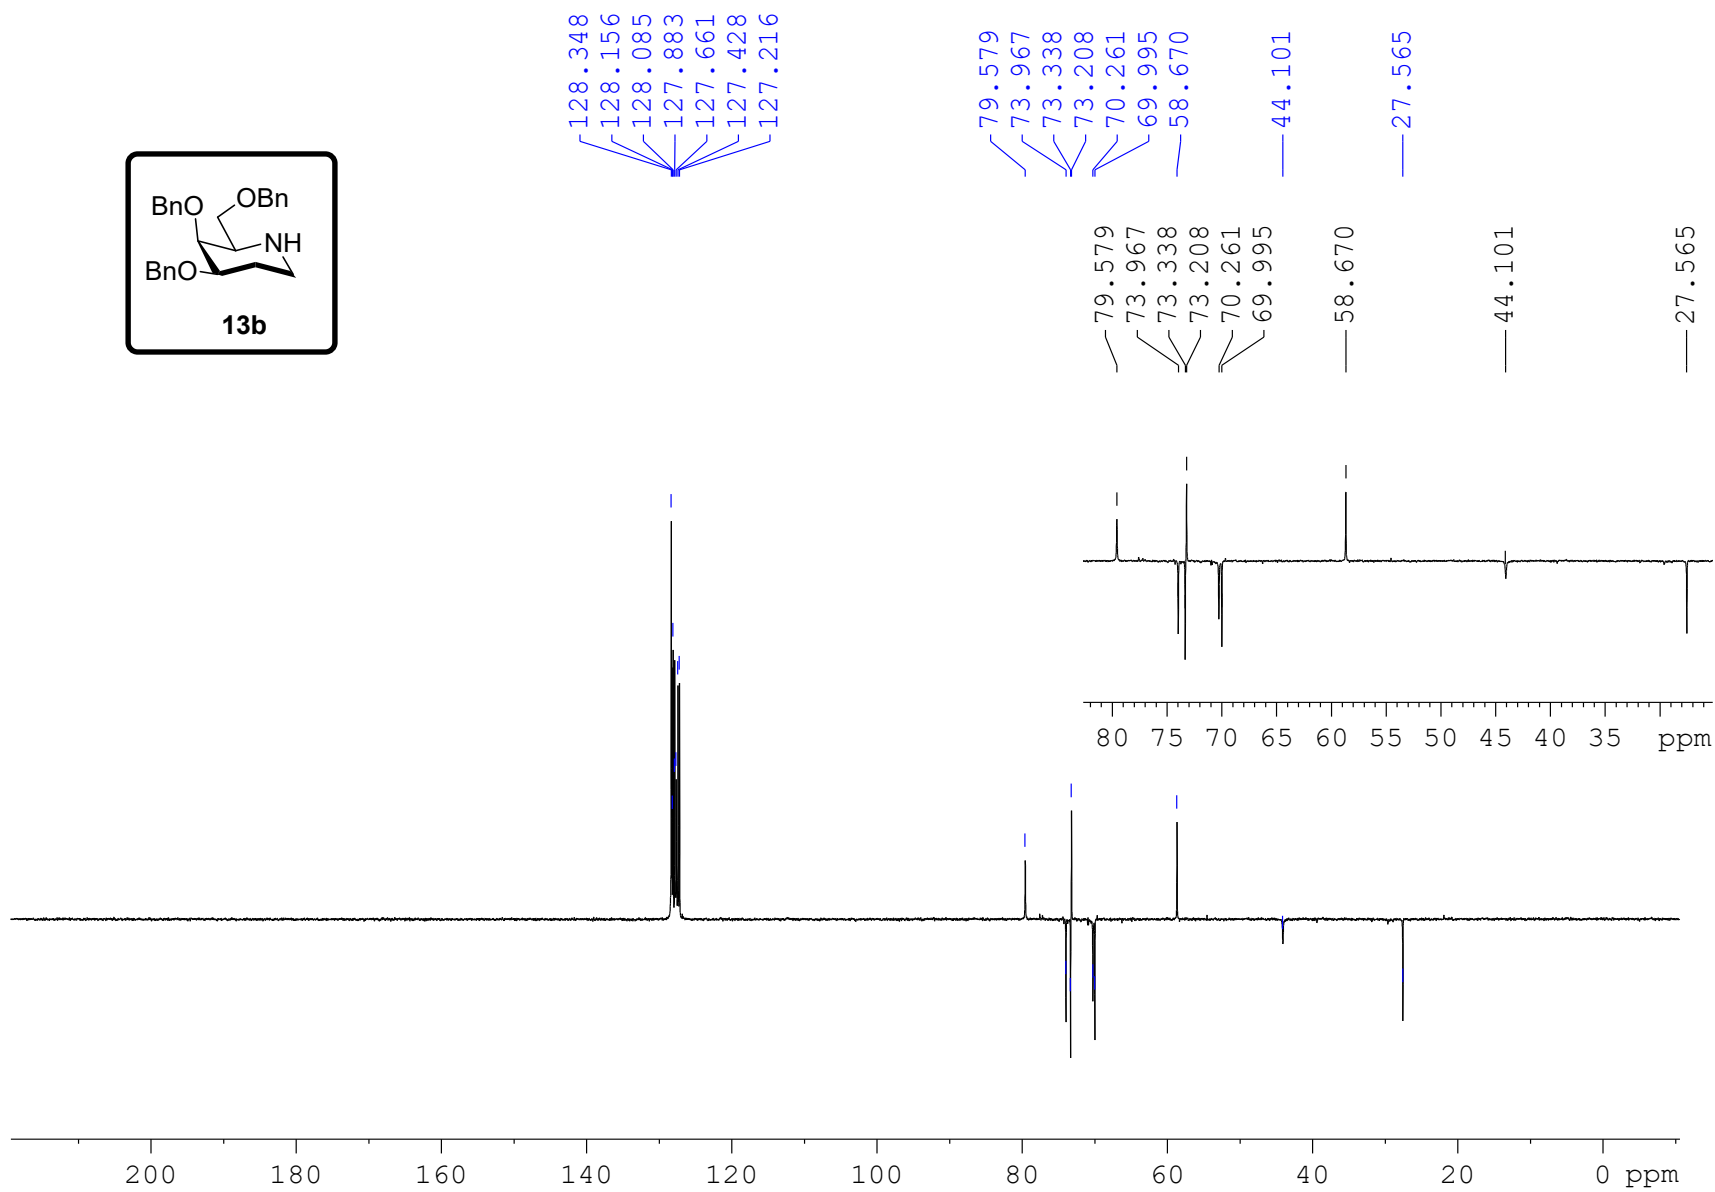

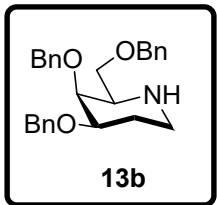

$^1\text{H}$ - $^1\text{H}$  COSY of **13b** (400MHz,  $\text{CDCl}_3$ , 298 K)

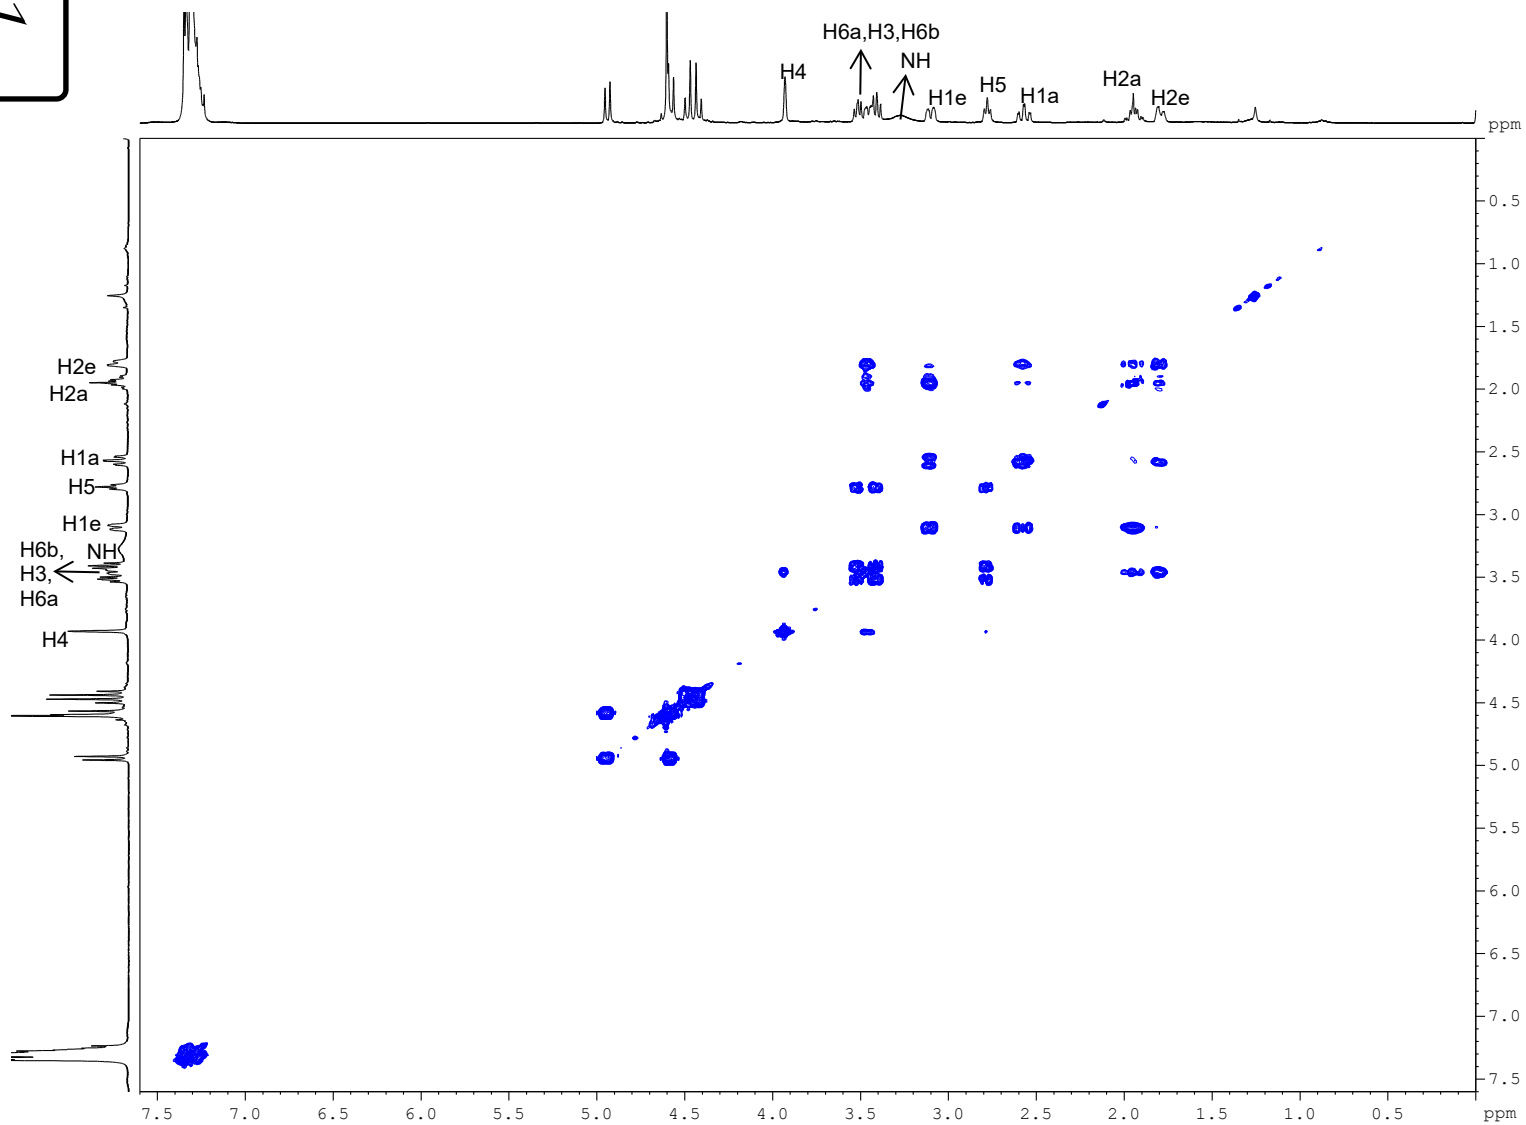

$^1\text{H}$ - $^1\text{H}$  COSY offset of **13b** (400MHz,  $\text{CDCl}_3$ , 298 K)

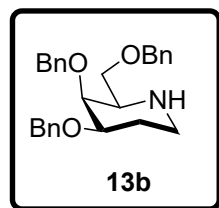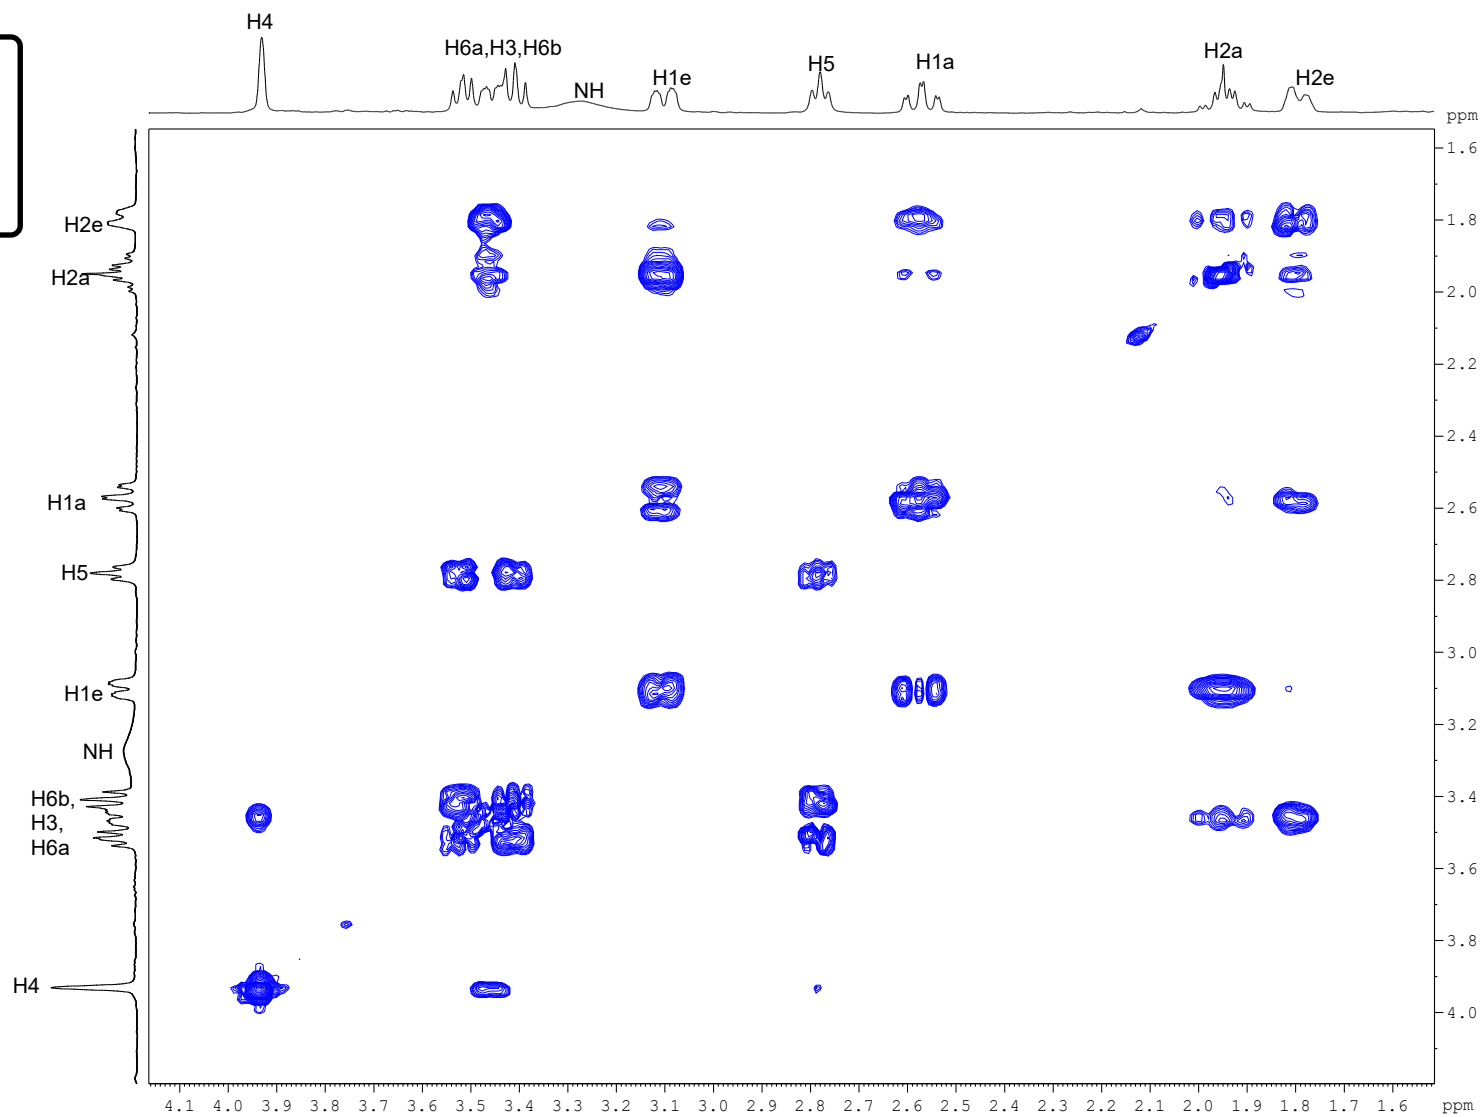

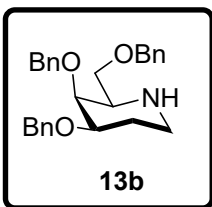

HSQC of **13b** (400MHz, CDCl<sub>3</sub>, 298 K)

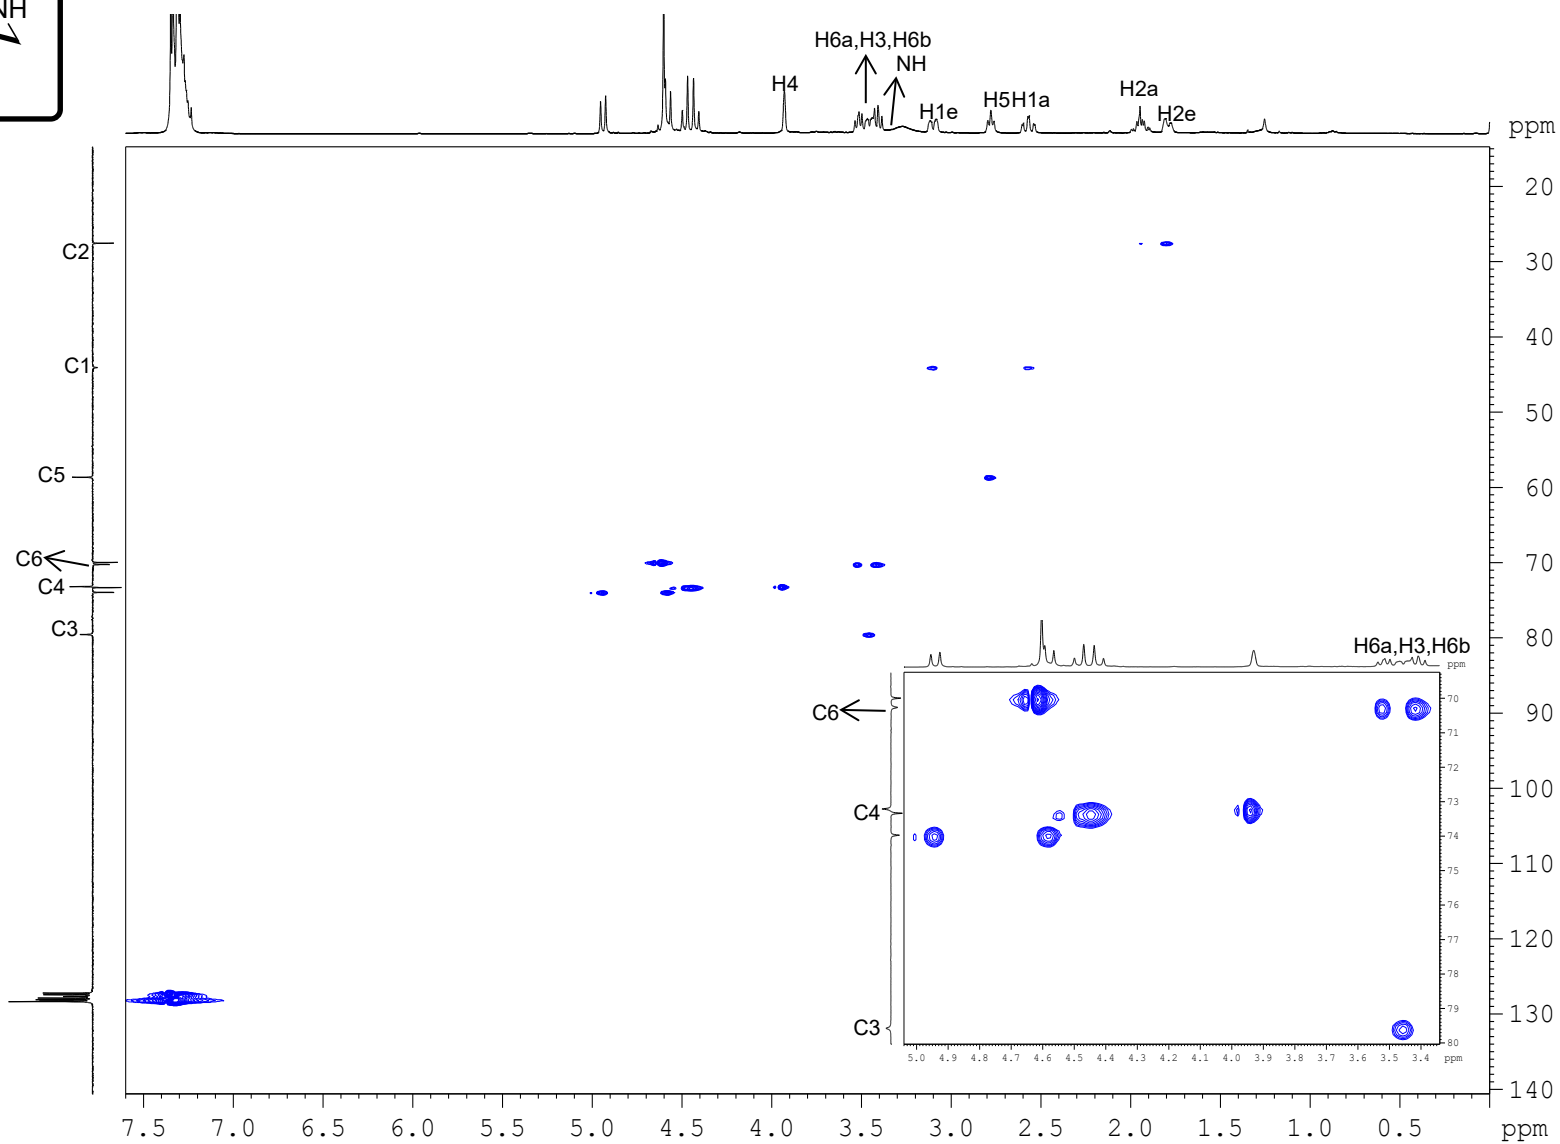

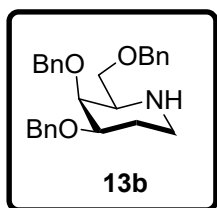

HMBC **13b** (400MHz, CDCl<sub>3</sub>, 298 K)

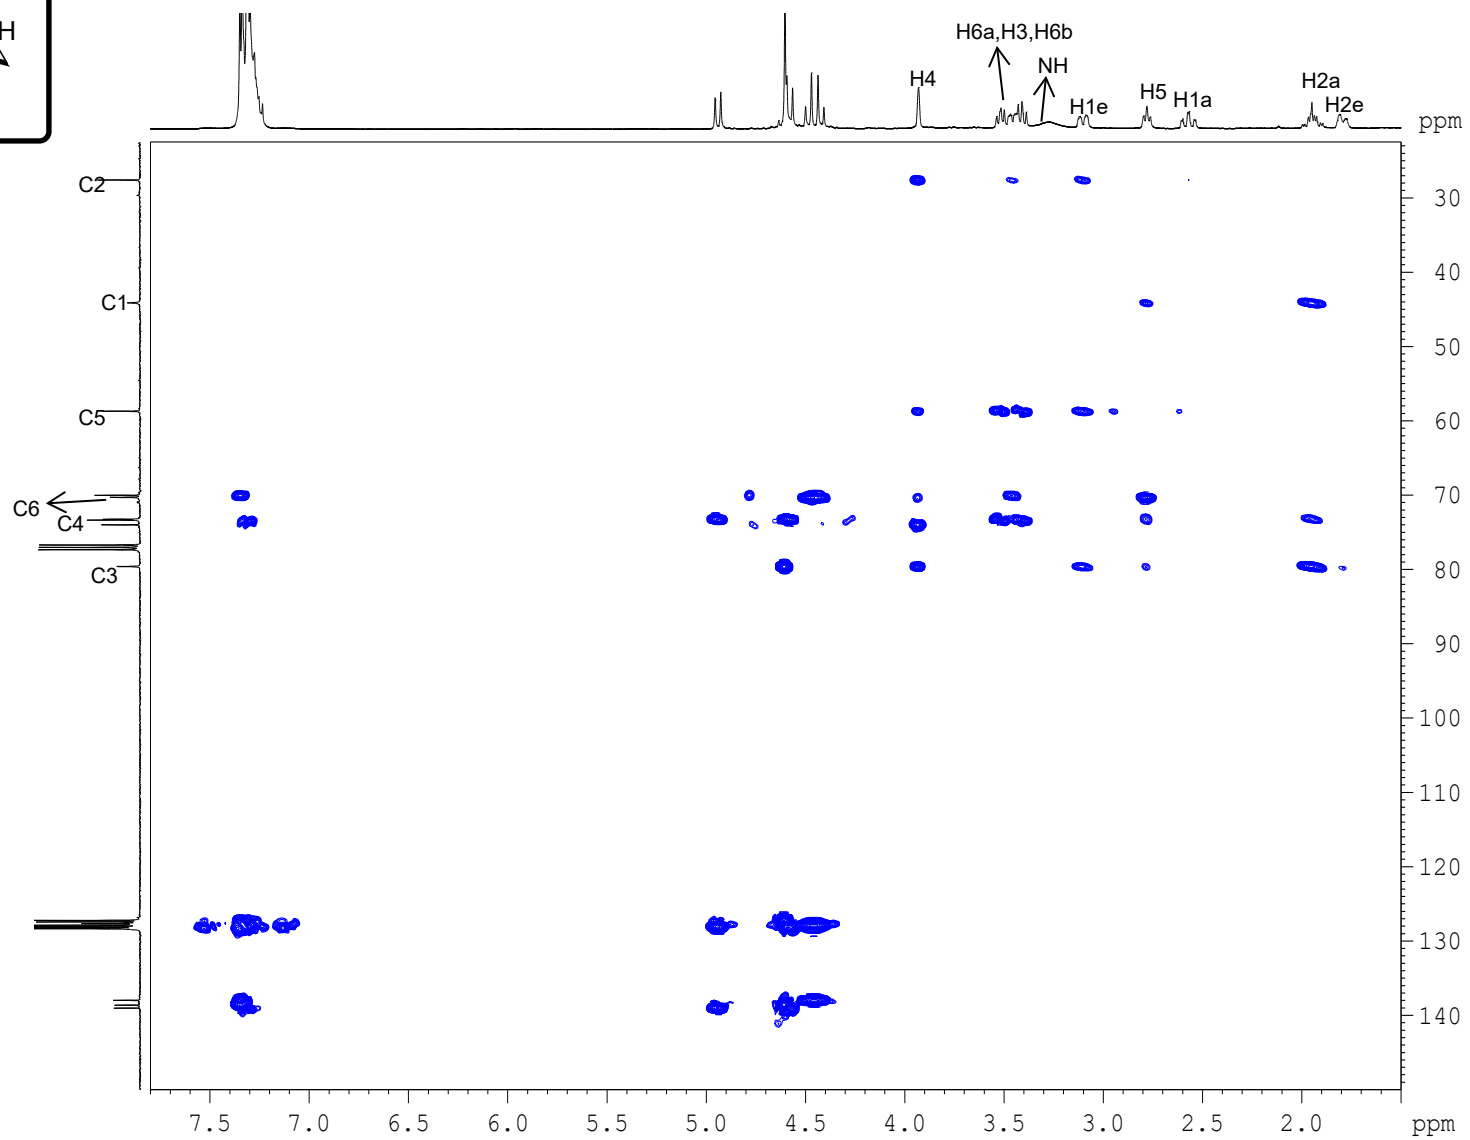

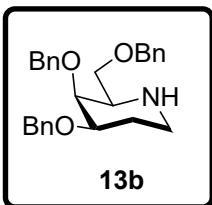

NOESY **13b** (400MHz, CDCl<sub>3</sub>, 298 K)

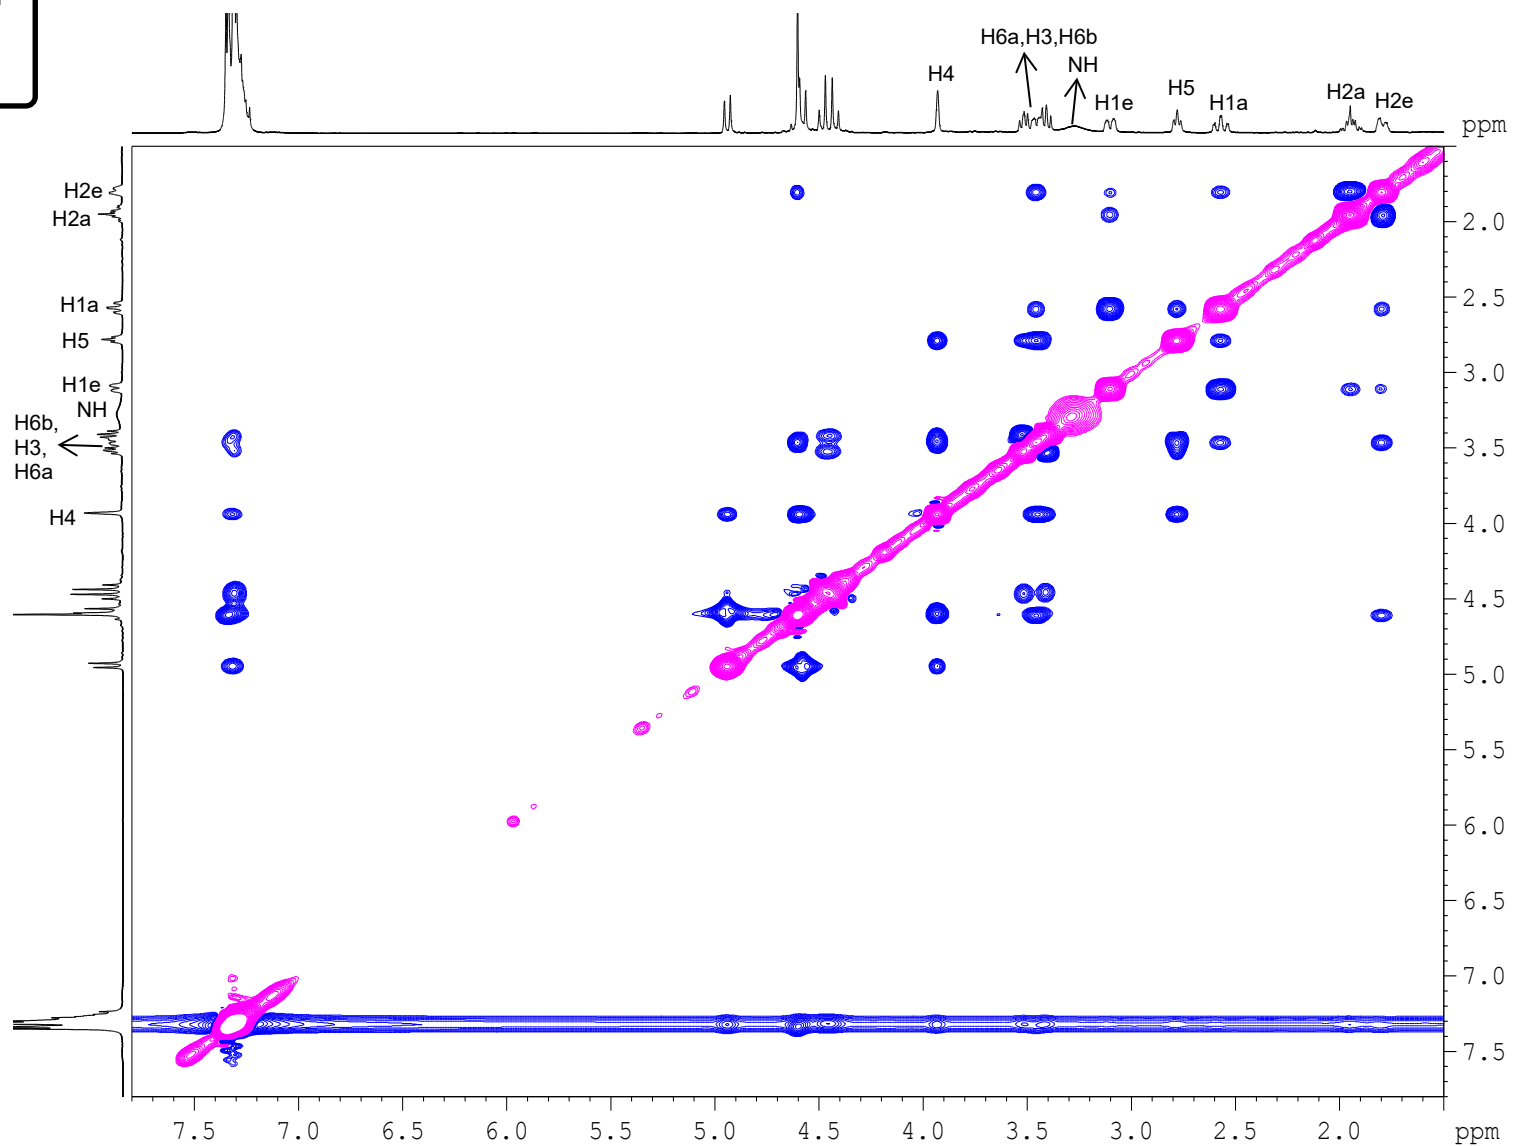



# ESI-MS of 13b

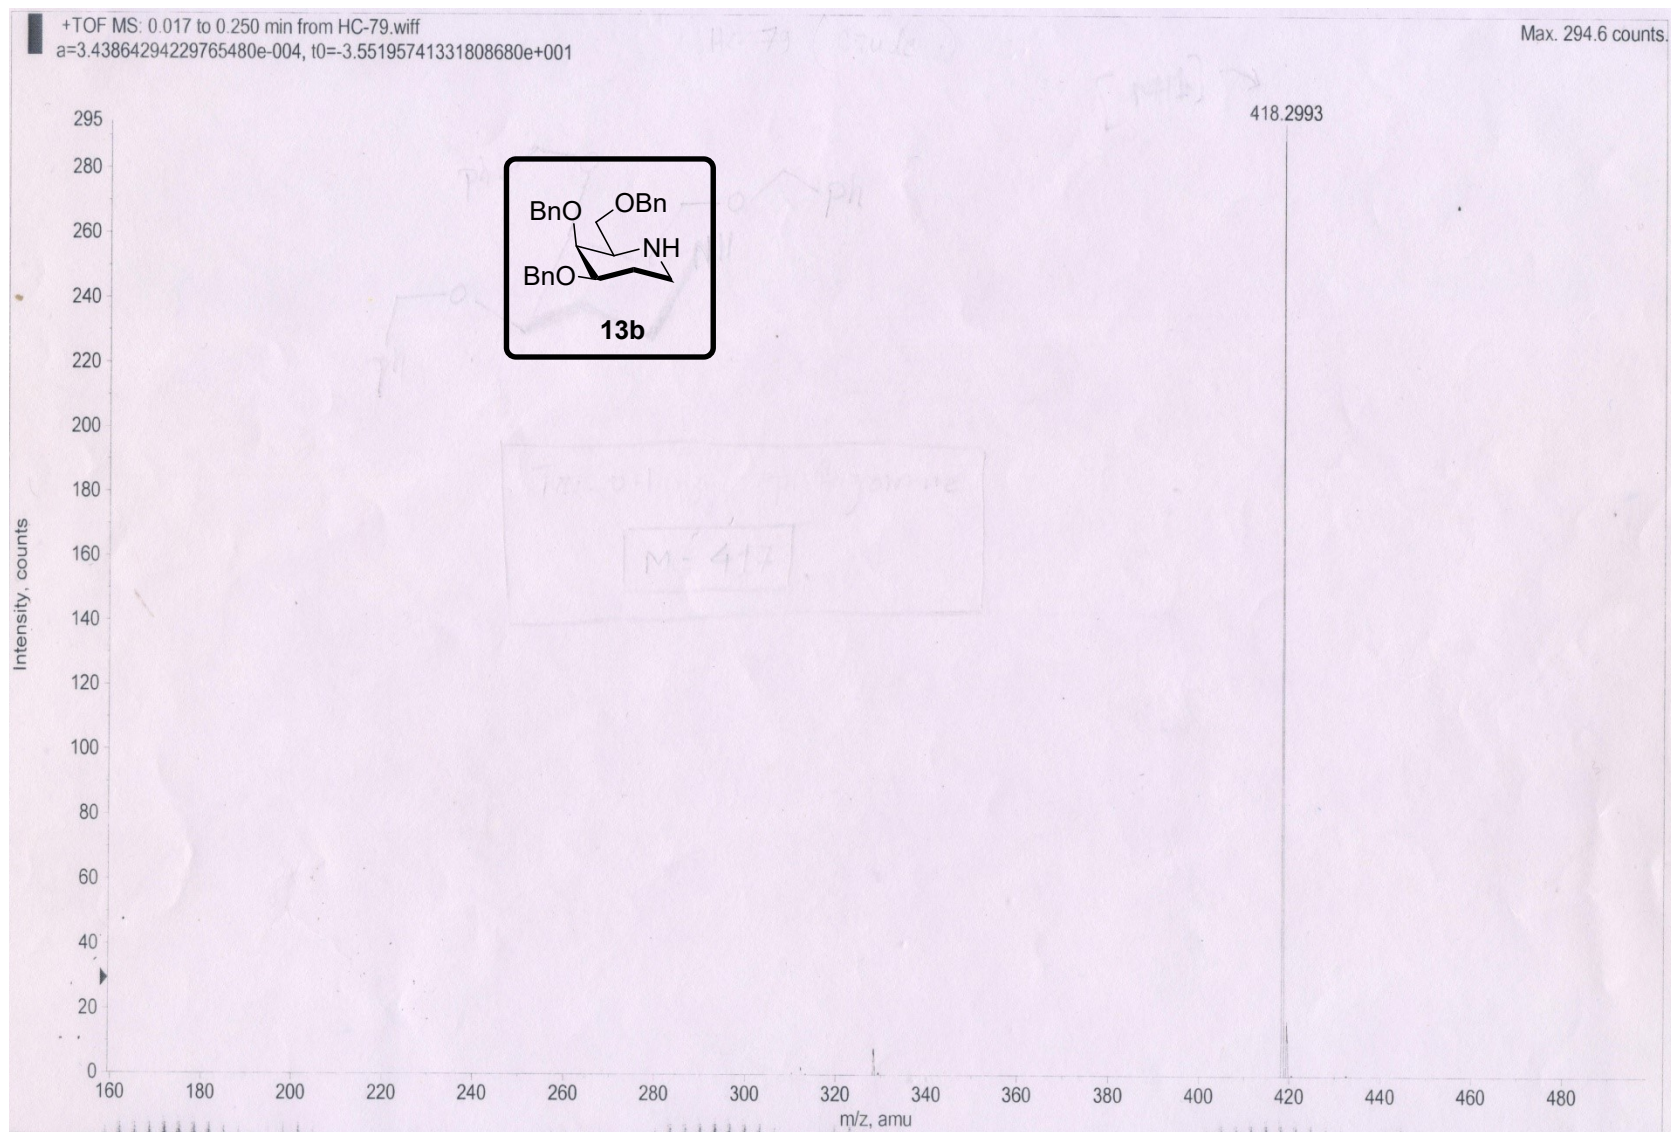

# HRMS of 13b

HC79 #464 RT: 2.06 AV: 1 NL: 1.52E9  
[ FTMS + p ESI Full ms [100.00-700.00]

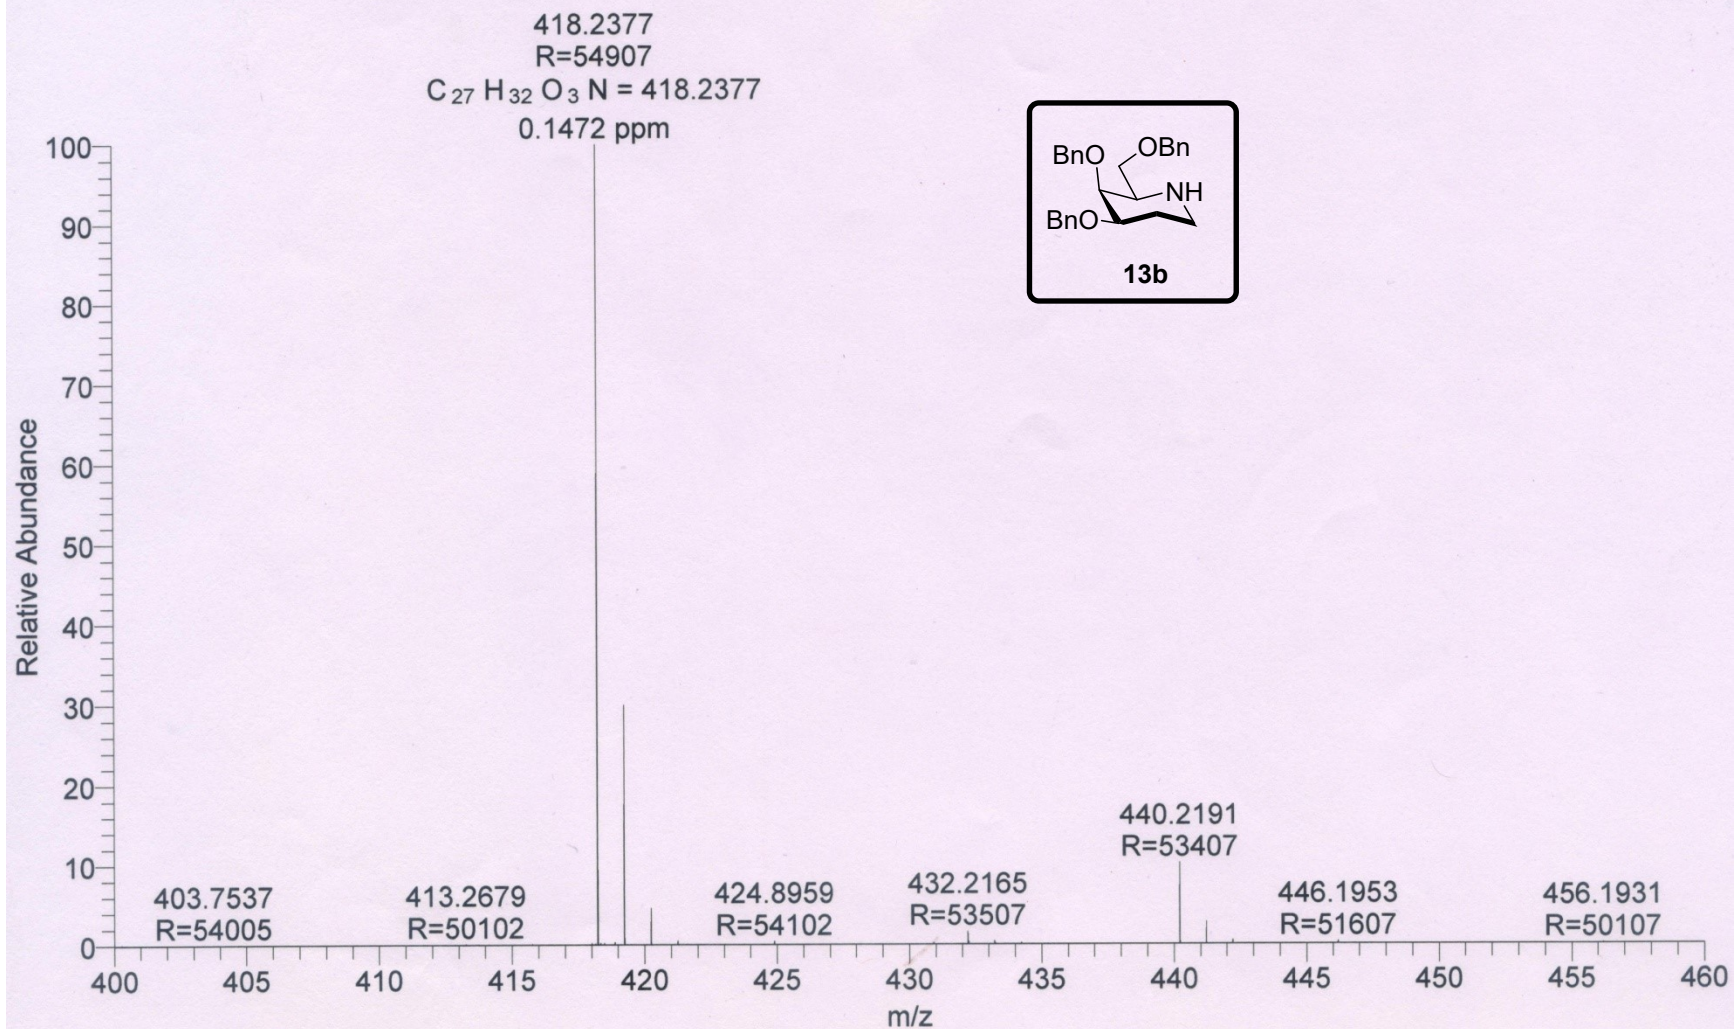

<sup>1</sup>H NMR of **20a** (500 MHz, CDCl<sub>3</sub>)

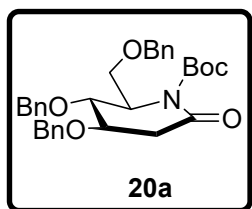

7.320  
7.312  
7.304  
7.293  
7.285  
7.274  
7.259  
7.249  
7.236  
7.202  
7.188  
4.652  
4.635  
4.552  
4.506  
4.447  
4.038  
4.034  
4.026  
4.022  
3.878  
3.867  
3.861  
3.856  
3.850  
3.839  
3.826  
3.682  
3.668  
3.663  
3.649  
3.635  
3.539  
3.531  
3.521  
3.512  
3.668  
3.663  
3.649  
3.635  
3.539  
3.531  
3.521  
3.512  
2.881  
2.871  
2.847  
2.837  
2.664  
2.646  
2.631  
2.613  
TMS

4.038  
4.034  
4.026  
4.022  
3.878  
3.867  
3.861  
3.856  
3.850  
3.839  
3.826  
3.682  
3.668  
3.663  
3.649  
3.635  
3.539  
3.531  
3.521  
3.512

2.881  
2.871  
2.847  
2.837  
2.664  
2.646  
2.631  
2.613

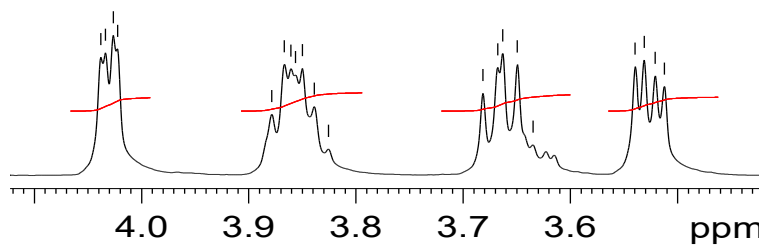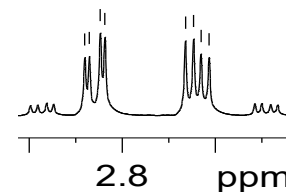

0.869  
1.188  
1.057  
0.901

0.886  
0.897

12 11 10 9 8 7 6 5 4 3 2 1 0 -1 ppm

15.250  
2.169  
2.739  
2.114  
0.869  
1.188  
1.057  
0.901  
0.886  
0.897  
9.355

<sup>13</sup>C NMR of **20a** (125 MHz, CDCl<sub>3</sub>)

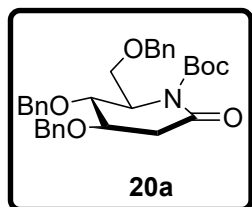

— 169.522

— 152.096

— 137.684

— 128.422

— 128.362

— 127.936

— 127.565

— 83.297

— CDCl<sub>3</sub>

— 76.345

— 75.421

— 73.168

— 72.187

— 71.562

— 70.276

— 58.937

— 37.514

— 27.914

— CDCl<sub>3</sub>

— 76.345

— 75.421

— 73.168

— 72.187

— 71.562

— 70.276

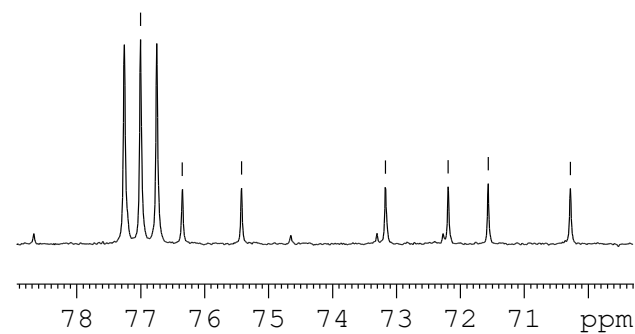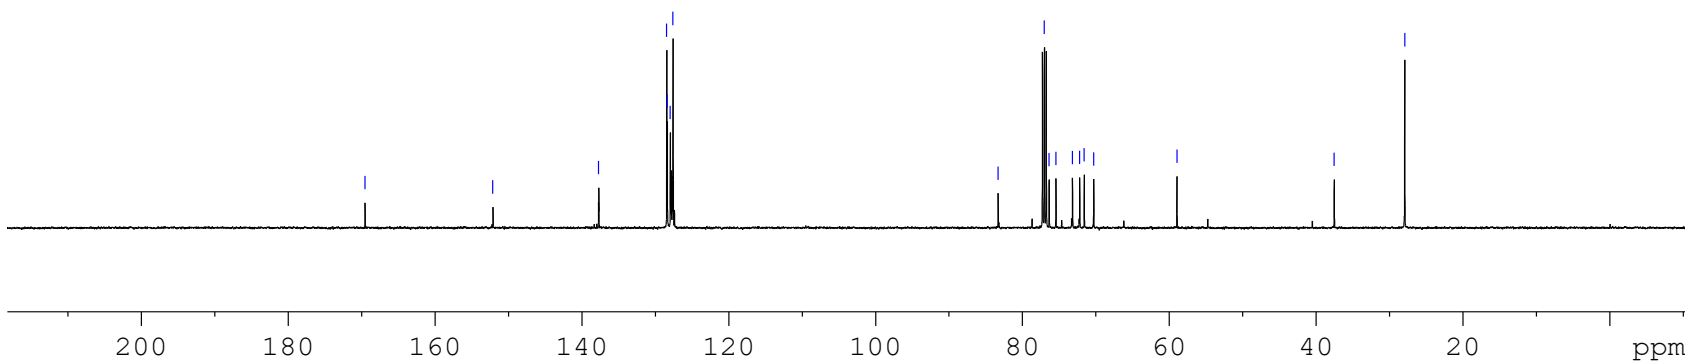

DEPT of **20a** (125 MHz, CDCl<sub>3</sub>)

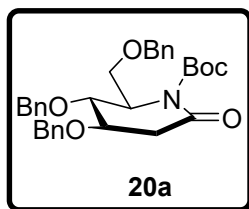

128.423  
128.362  
127.937  
127.864  
127.786  
127.682  
127.618  
127.565  
127.379

76.346  
75.415  
73.165  
72.193  
71.554  
70.281  
58.942

37.513  
27.914

76.346  
75.415  
73.165  
72.193  
71.554  
70.281

58.942

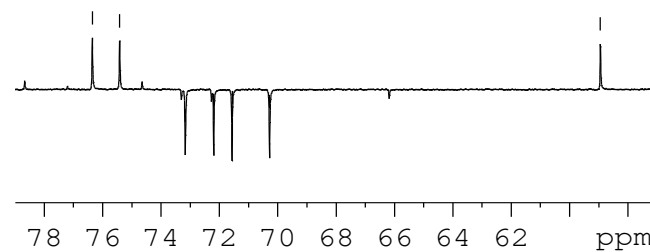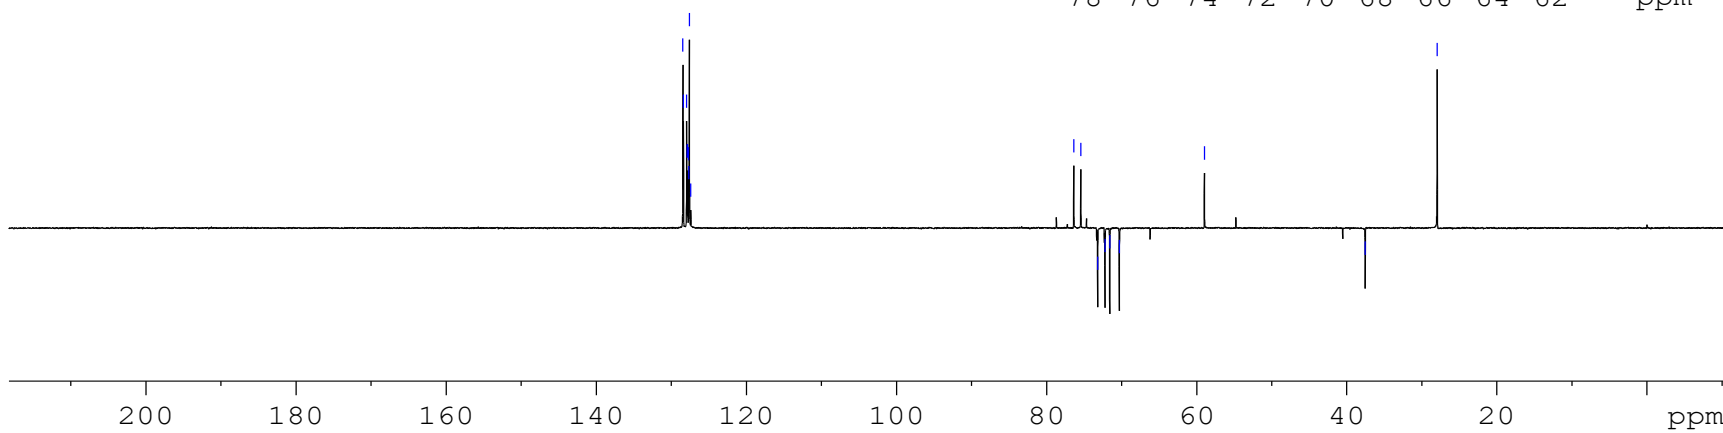

# ESI-MS of 20a

HC-165-r #13-74 RT: 0.11-0.64 AV: 62 SB: 16 0.00-0.09, 0.65-0.68 NL: 1.18E6  
T: {0,0} + c ESI corona sid=40.00 det=1200.00 Full ms [ 100.00-900.00]

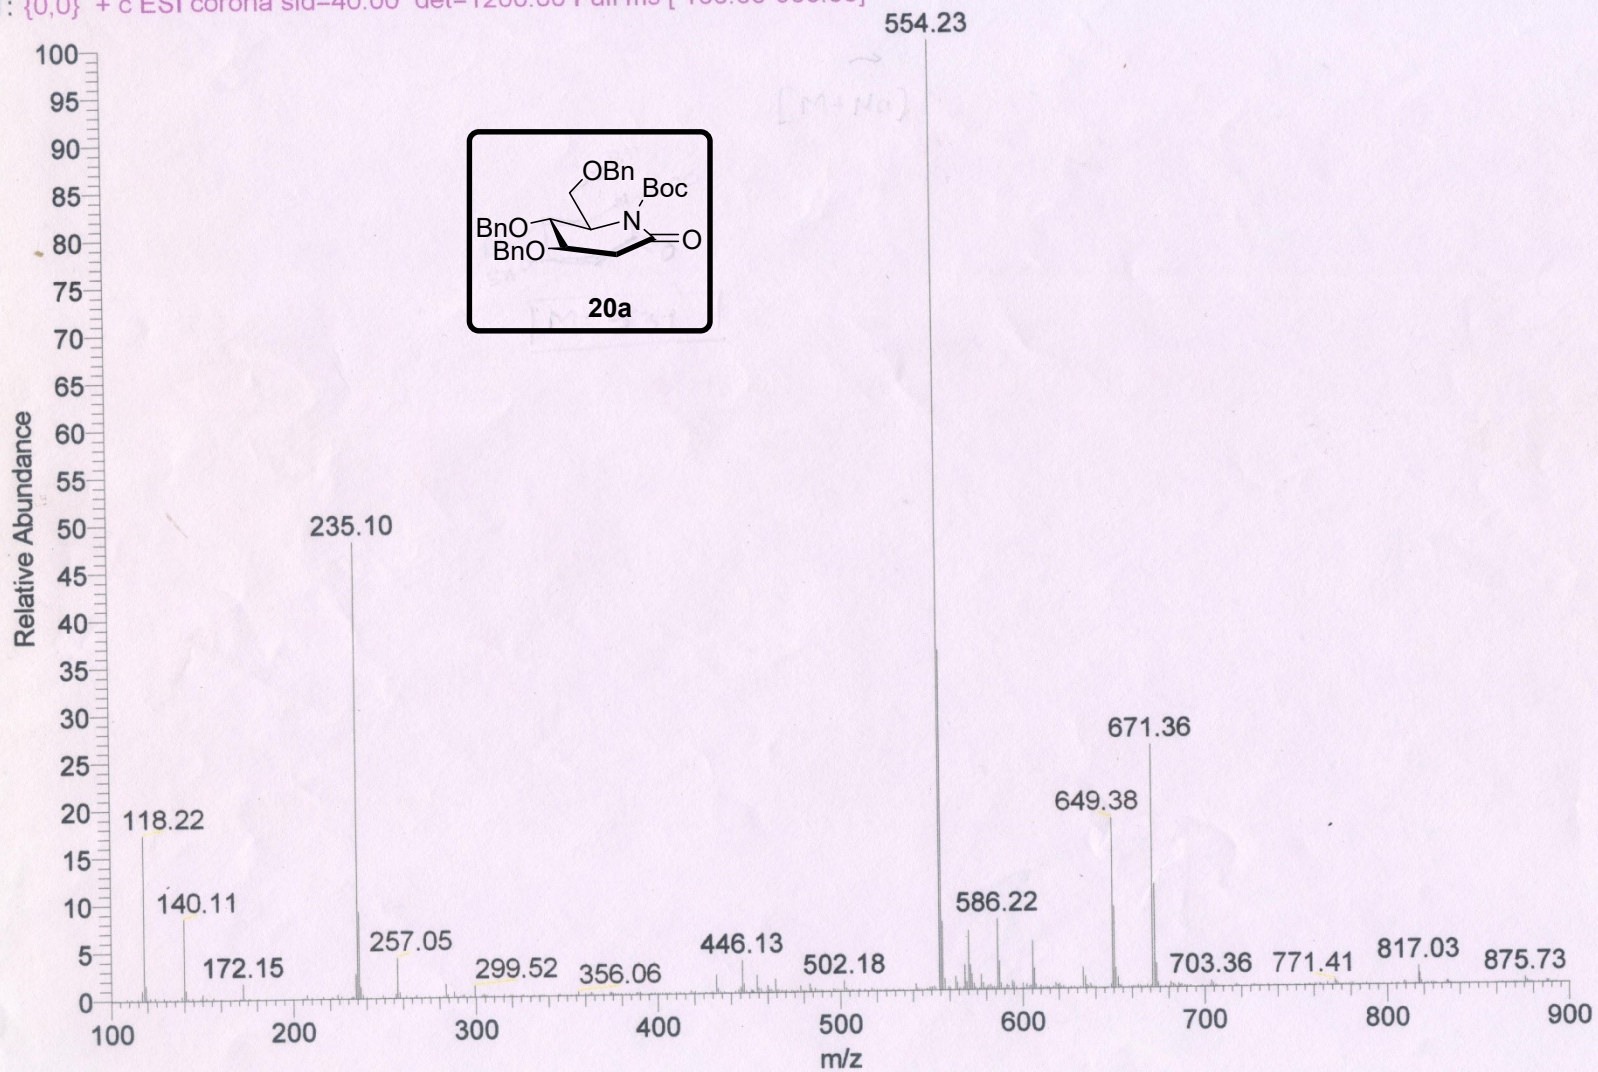

# HRMS (ESI) of 20a

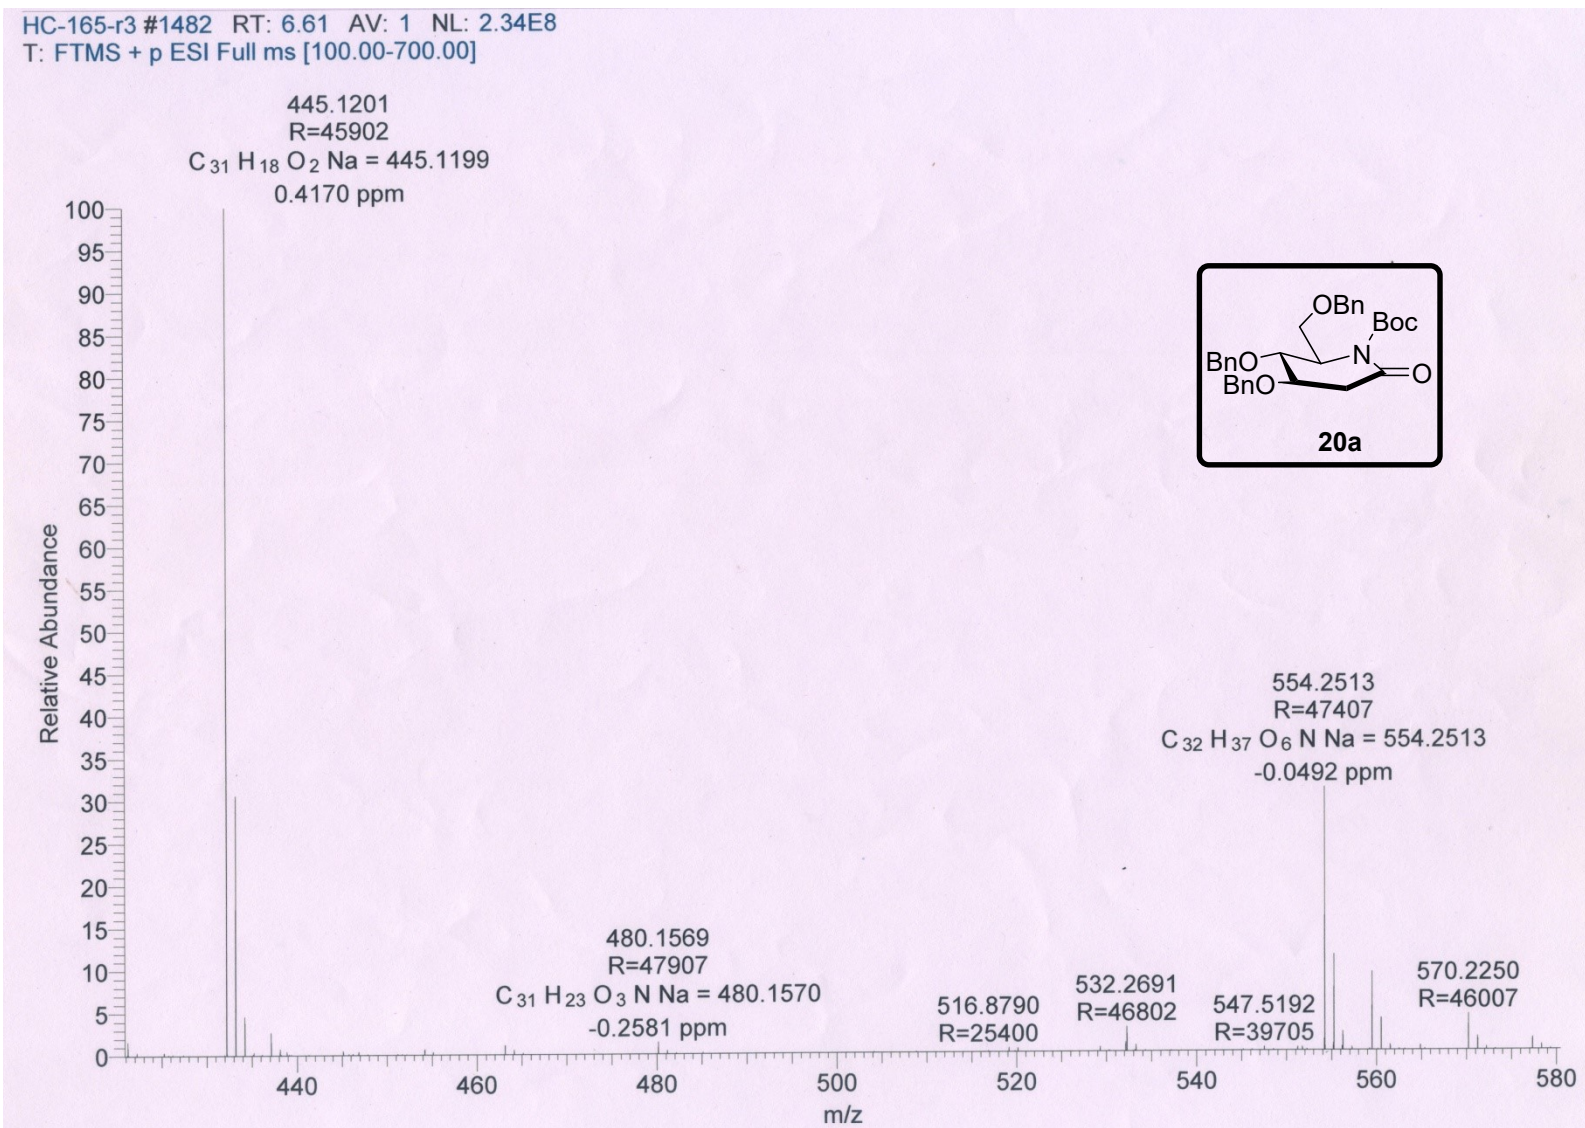

$^1\text{H}$  NMR of **20b** (200 MHz,  $\text{CDCl}_3$ )

178RP.esp

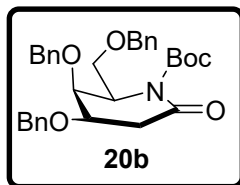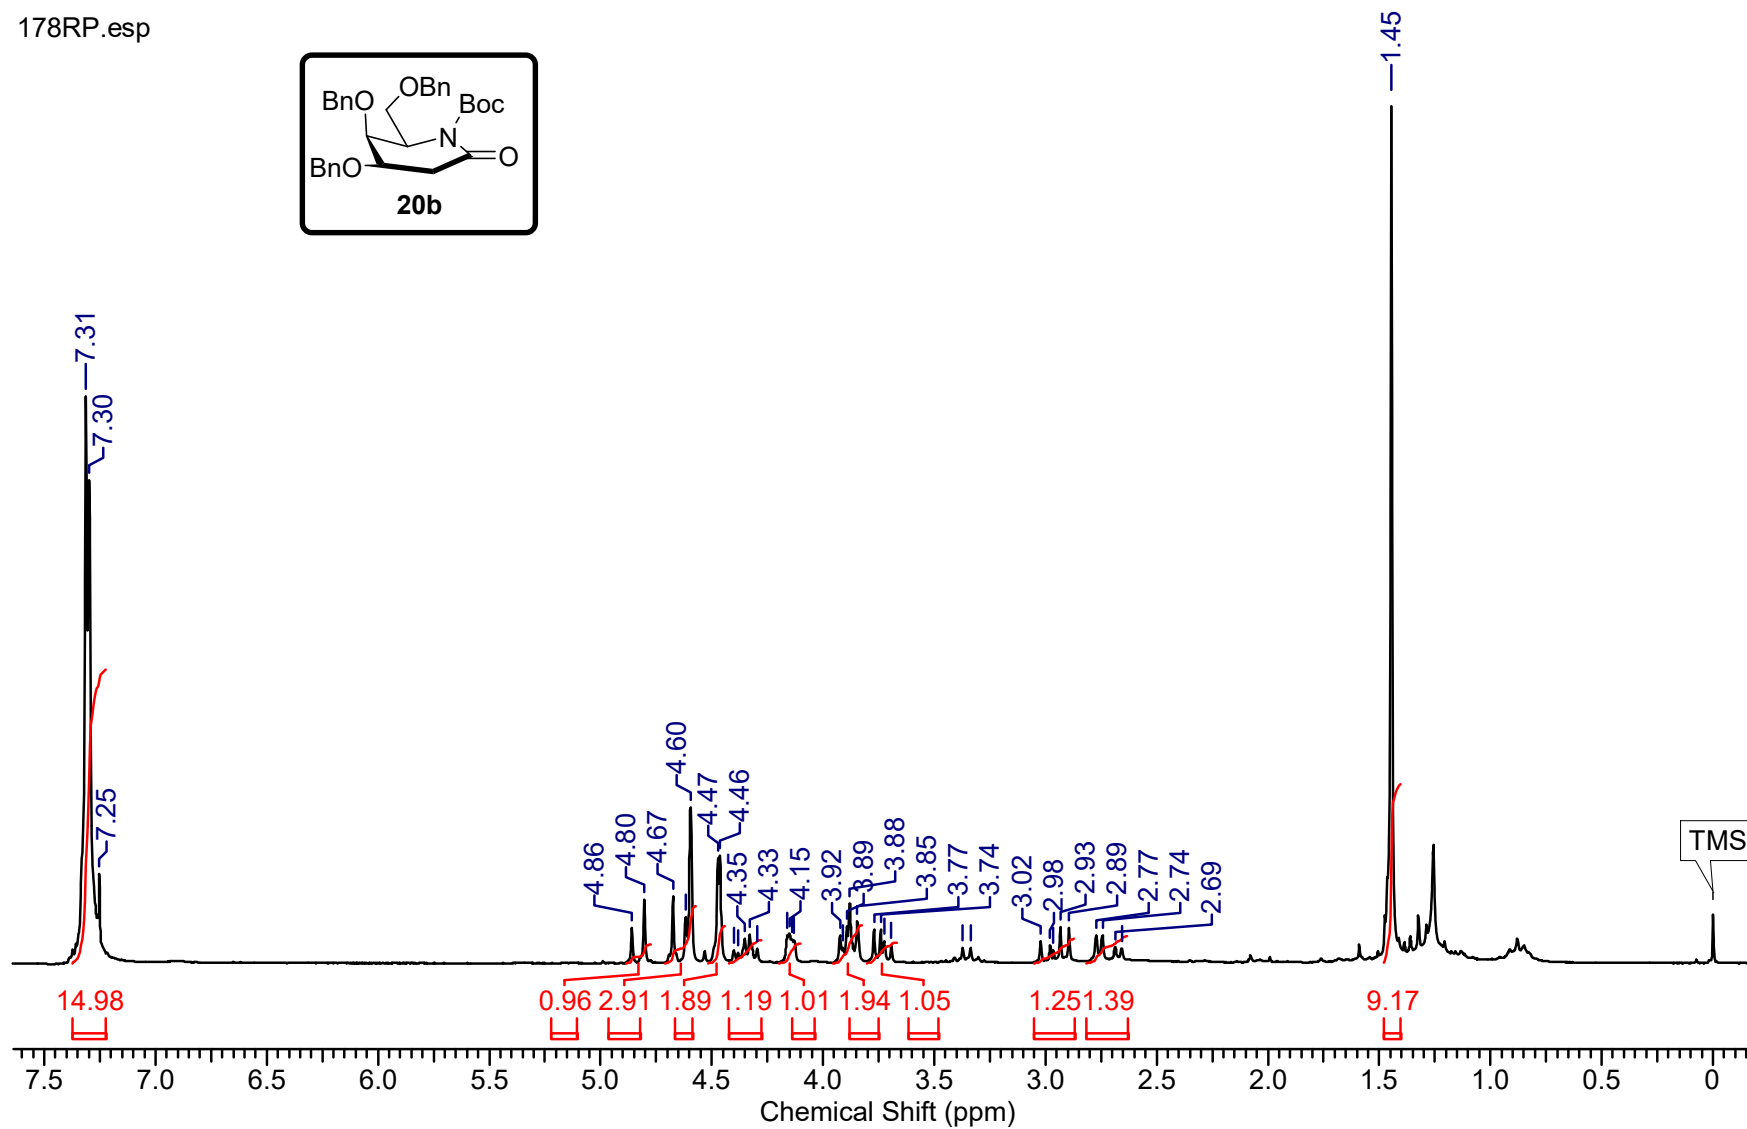



<sup>13</sup>C NMR of **20b** (50 MHz, CDCl<sub>3</sub>)

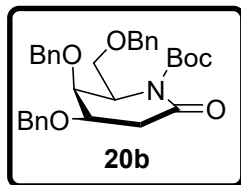

168.473  
152.417  
137.977  
137.865  
137.751  
128.438  
128.330  
127.774  
127.632  
127.403

83.659  
CDCl<sub>3</sub>  
73.593  
73.380  
73.178  
72.984  
71.302  
68.856  
57.029

36.903  
27.674  
73.593  
73.380  
73.178  
72.984  
71.302  
68.856

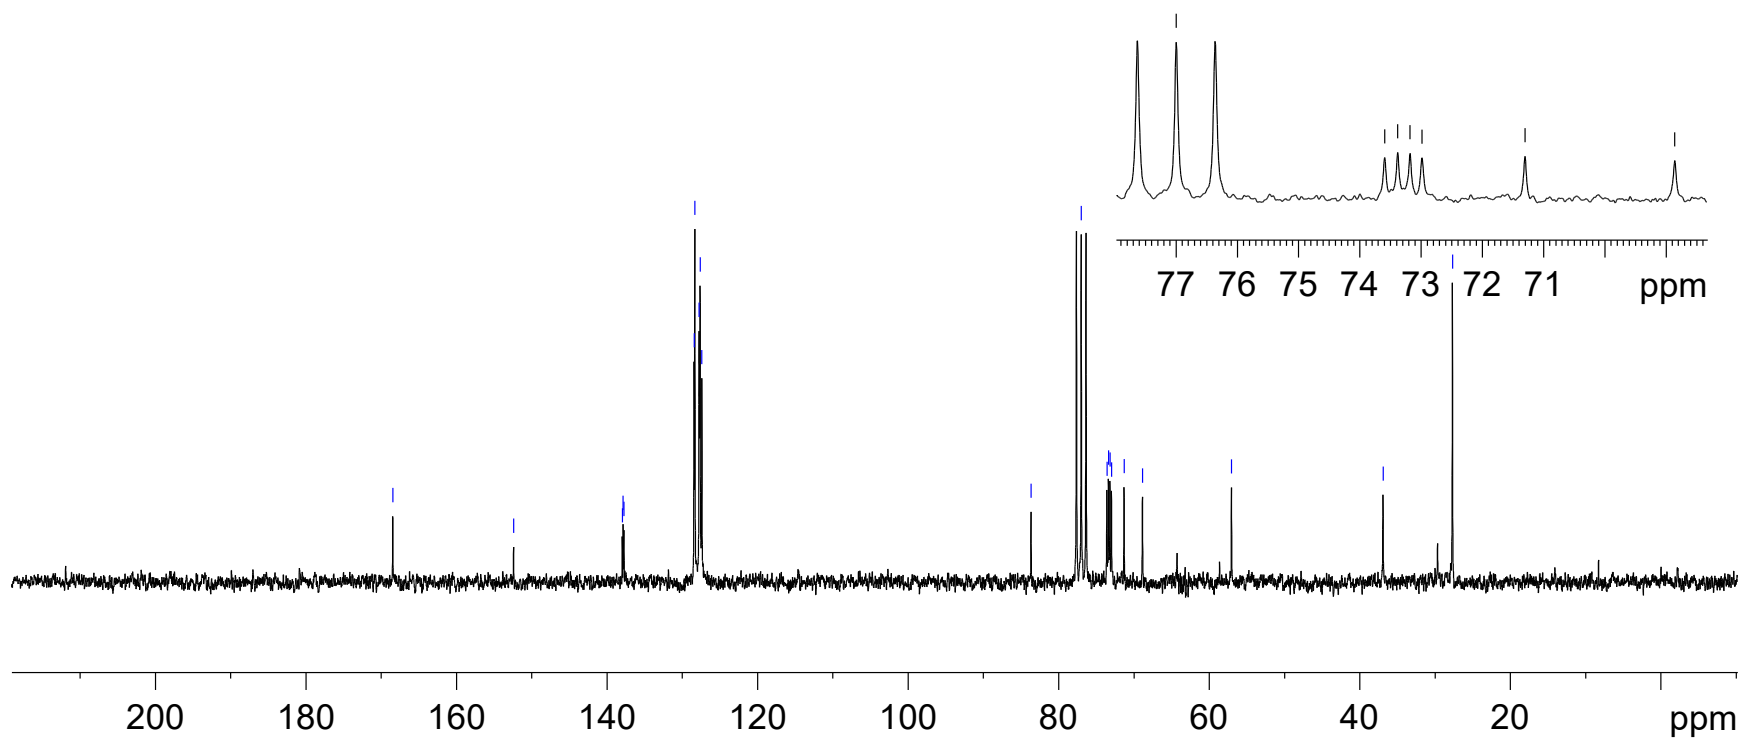

DEPT of **20b** (50 MHz, CDCl<sub>3</sub>)

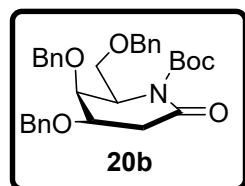

128.446  
128.339  
127.786  
127.636  
127.406

73.575  
73.386  
73.190  
72.962  
71.302  
68.855  
57.040

36.902  
27.682

73.575  
73.386  
73.190  
72.962  
71.302  
68.855

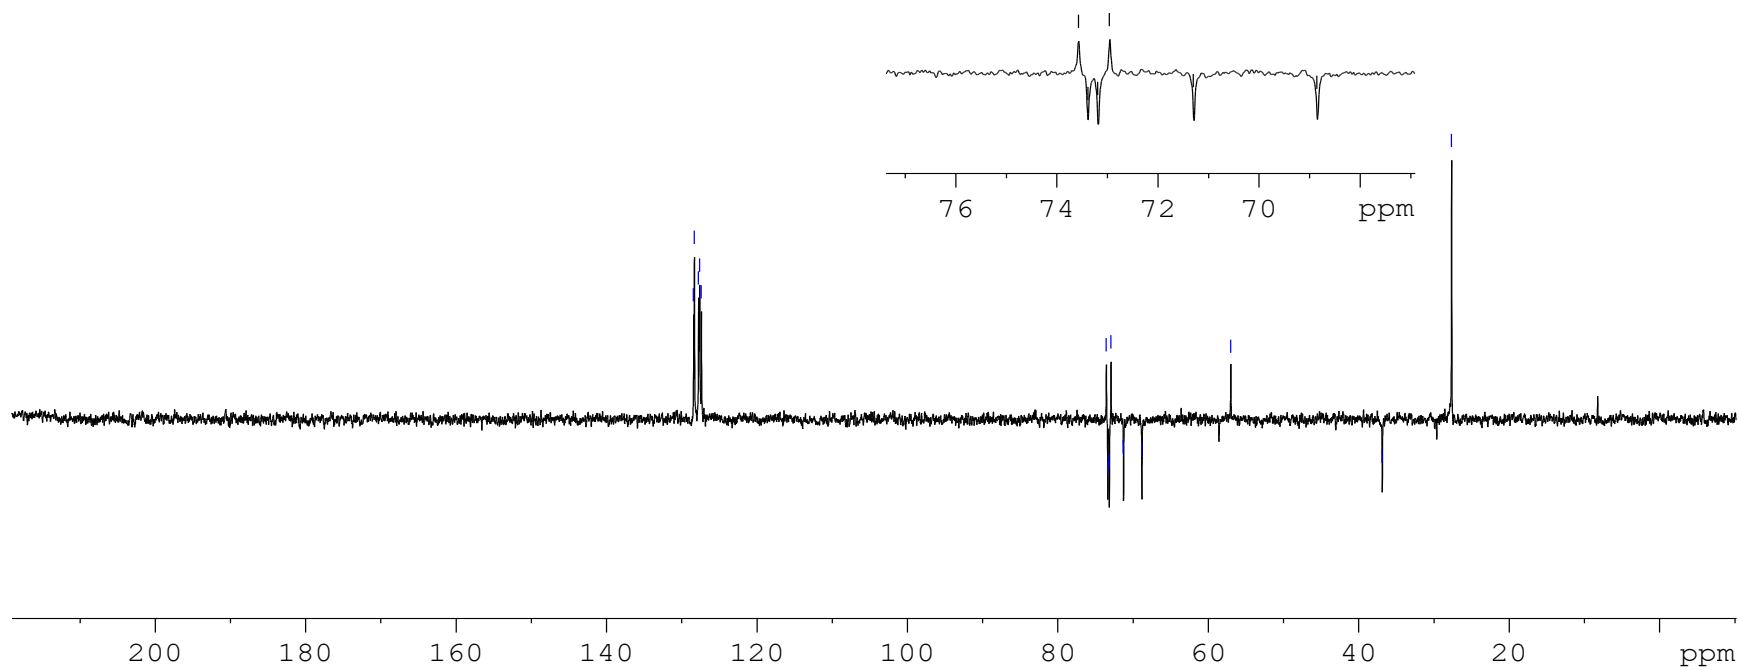

# ESI-MS of 20b

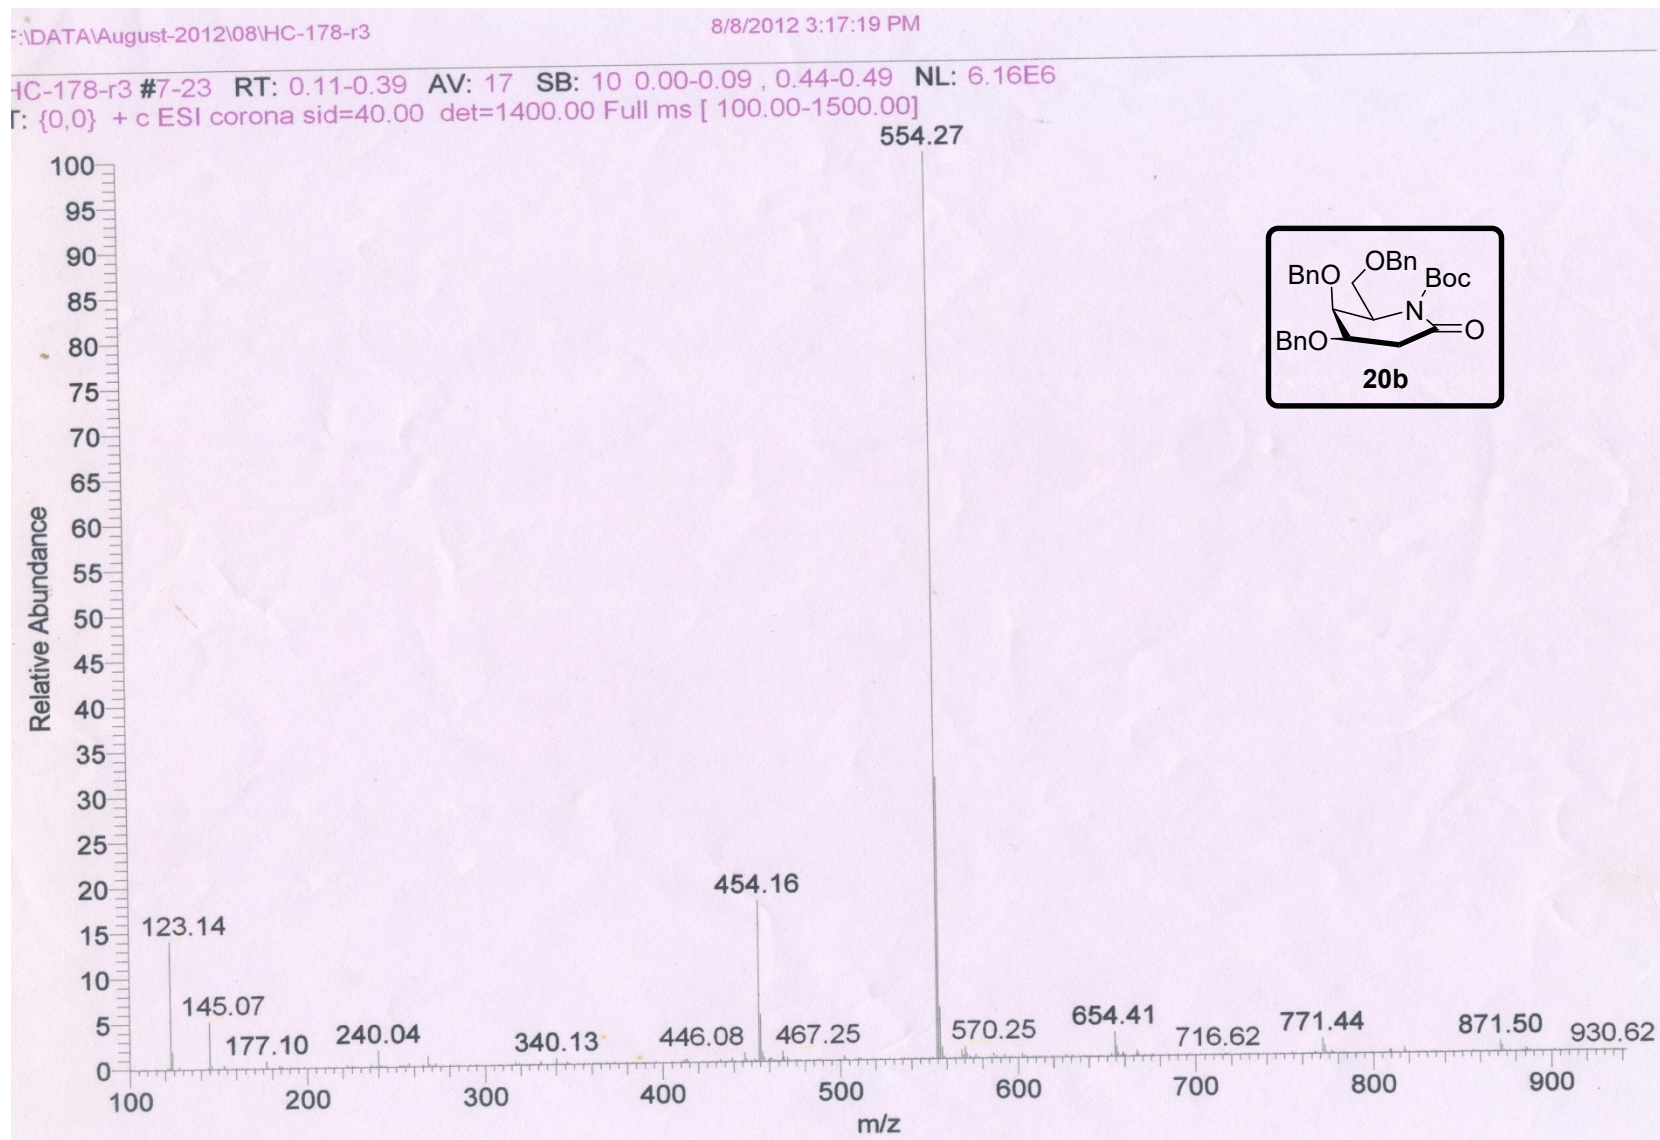

# HRMS of 20b

HC-178 #446 RT: 1.99 AV: 1 NL: 2.72E7  
T: FTMS + p ESI Full ms [100.00-700.00]

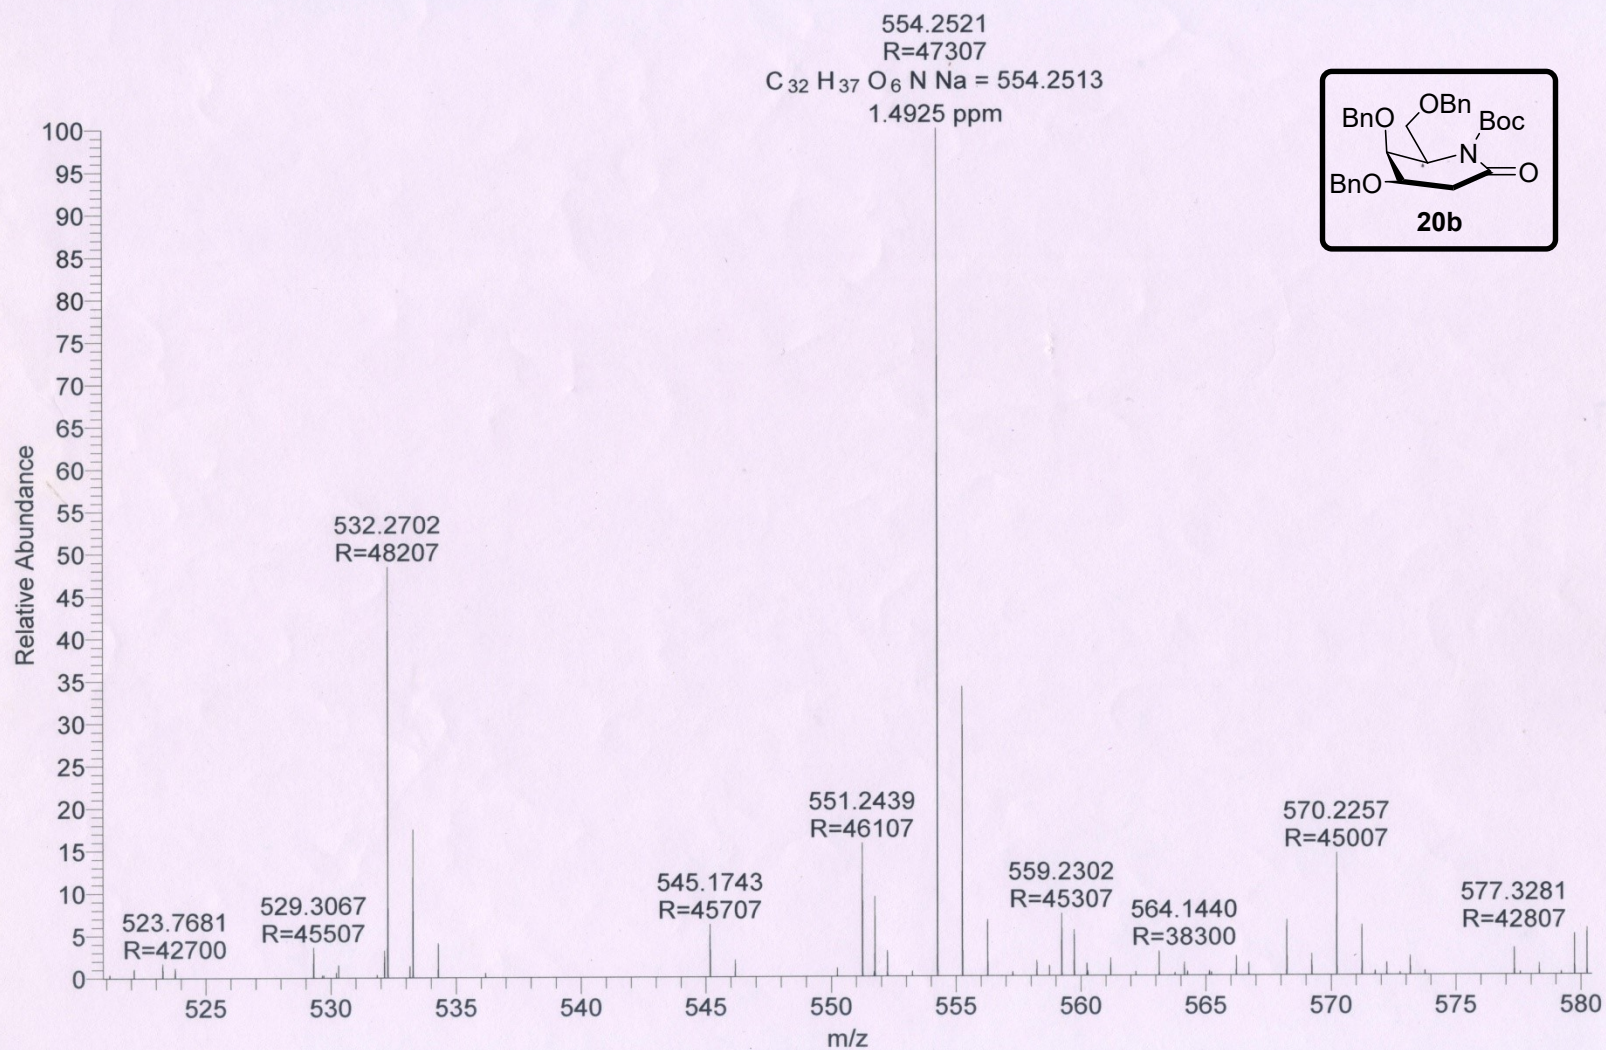

$^1\text{H}$  NMR of **21a** (200 MHz,  $\text{CDCl}_3$ )

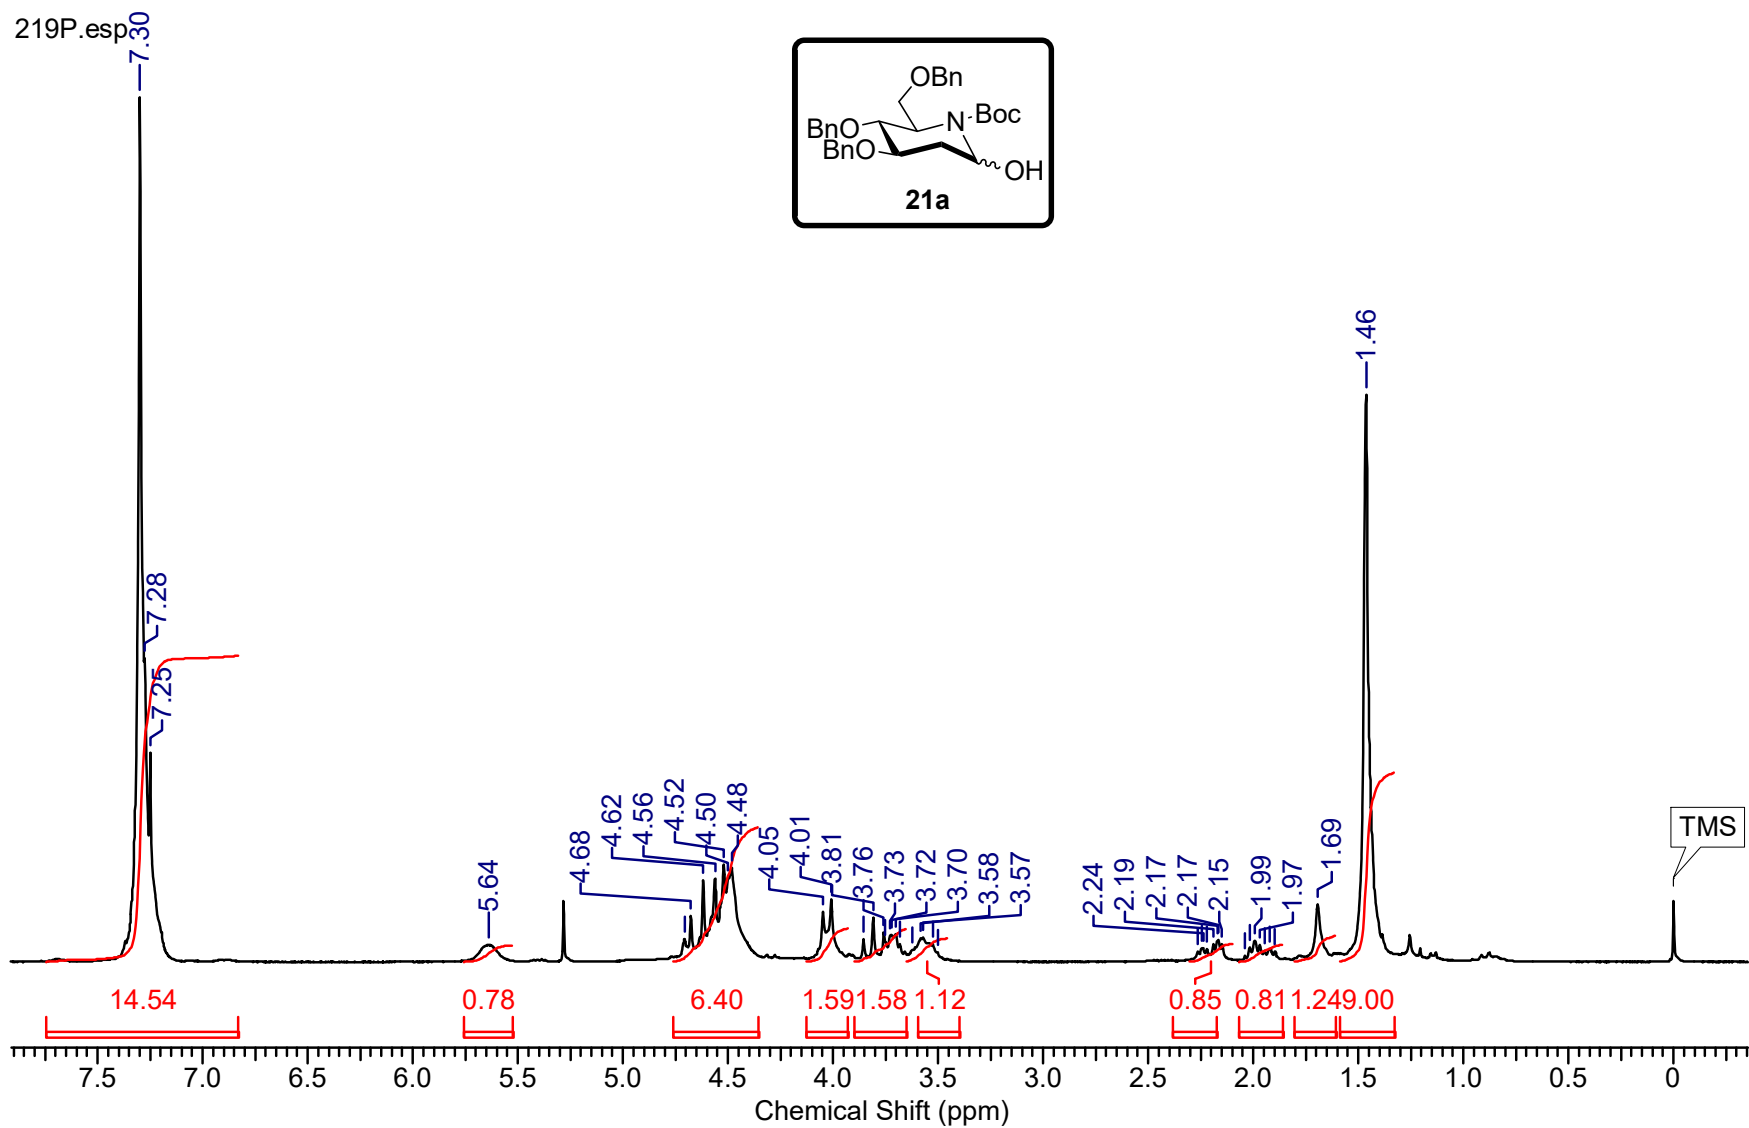

<sup>13</sup>C NMR of **21a** (50 MHz, CDCl<sub>3</sub>)

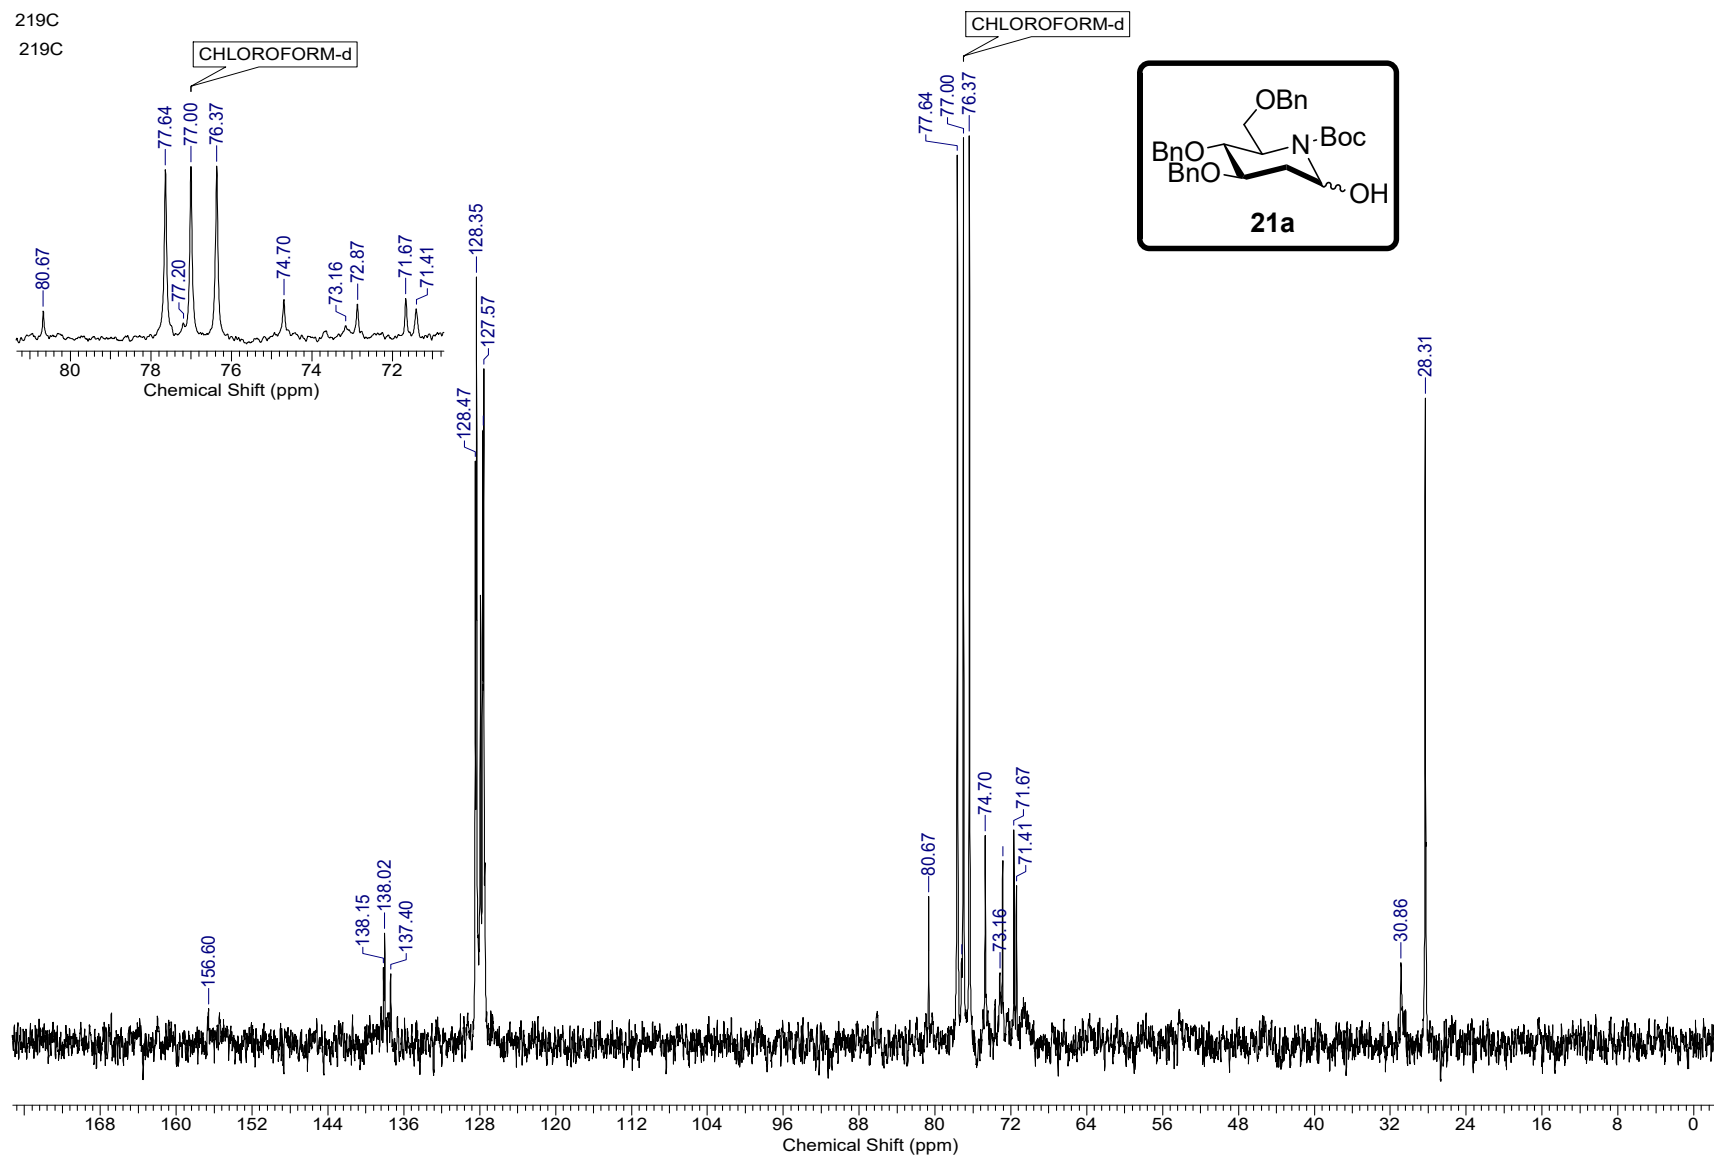

# ESI-MS of 21a

HC-219 #7-30 RT: 0.10-0.50 AV: 24 NL: 4.59E6

T: {0,0} + c ESI corona sid=40.00 det=1400.00 Full ms [ 100.00-1200.00]

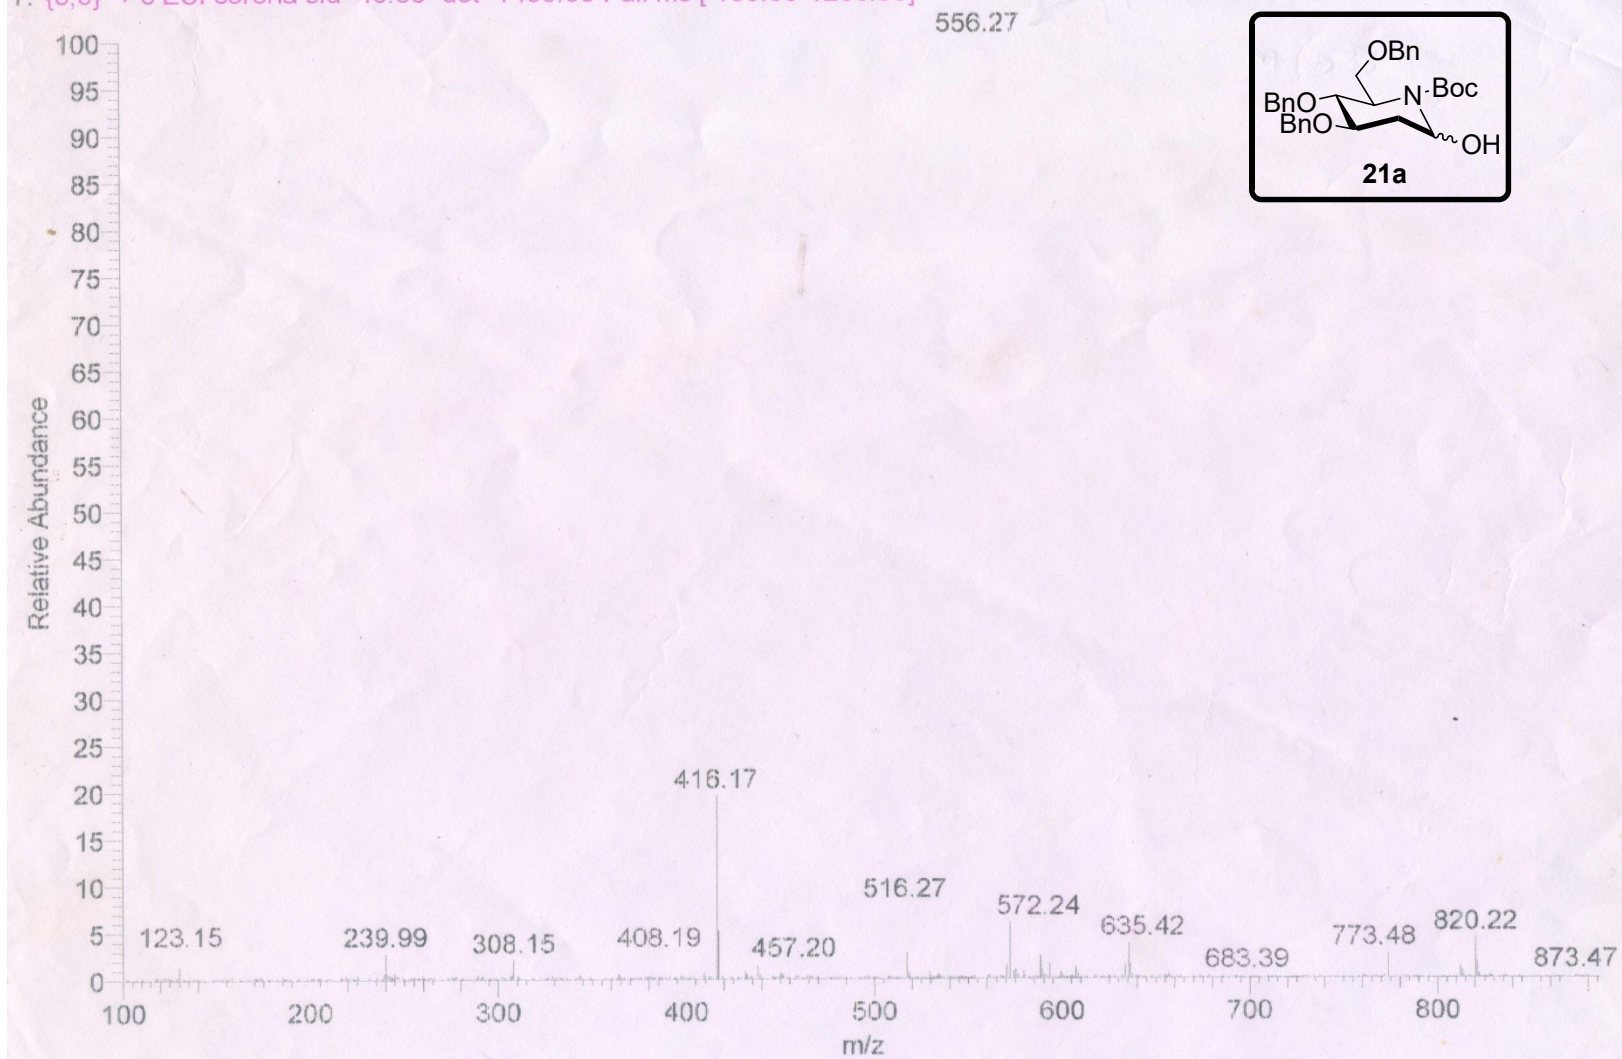

# HRMS (ESI) of 21a

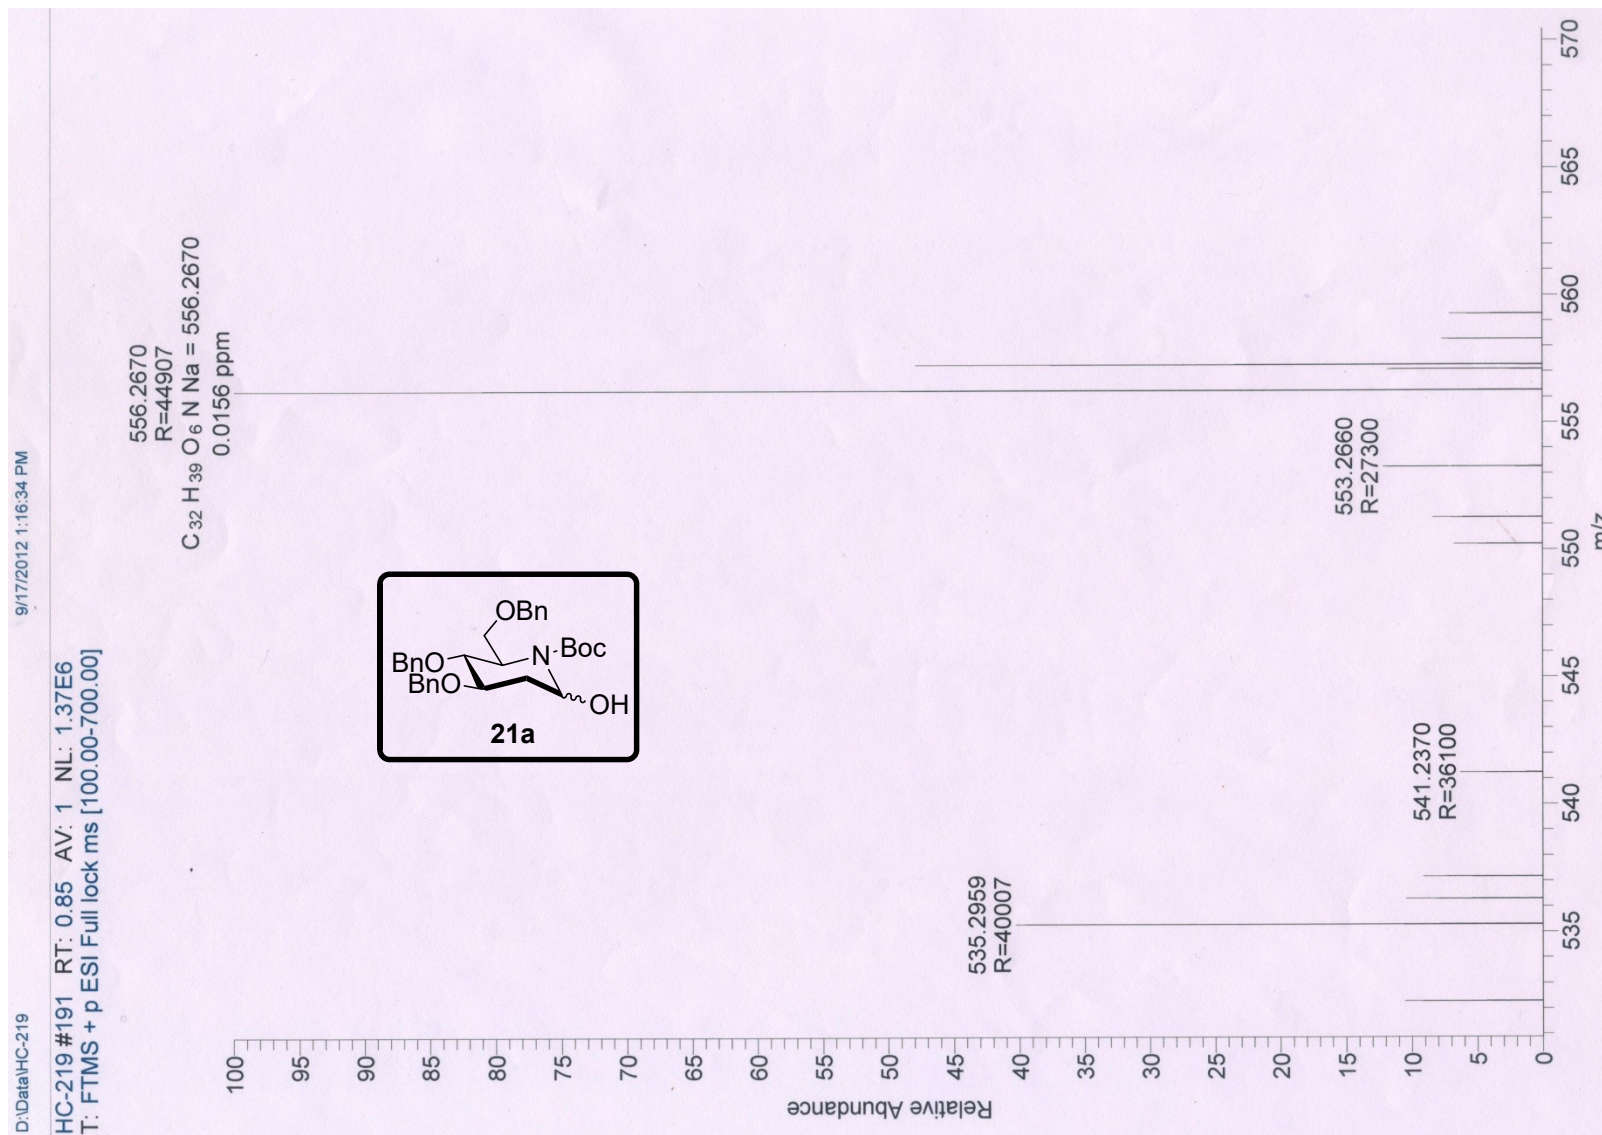



<sup>1</sup>H NMR of **17a** (500 MHz, CDCl<sub>3</sub>)

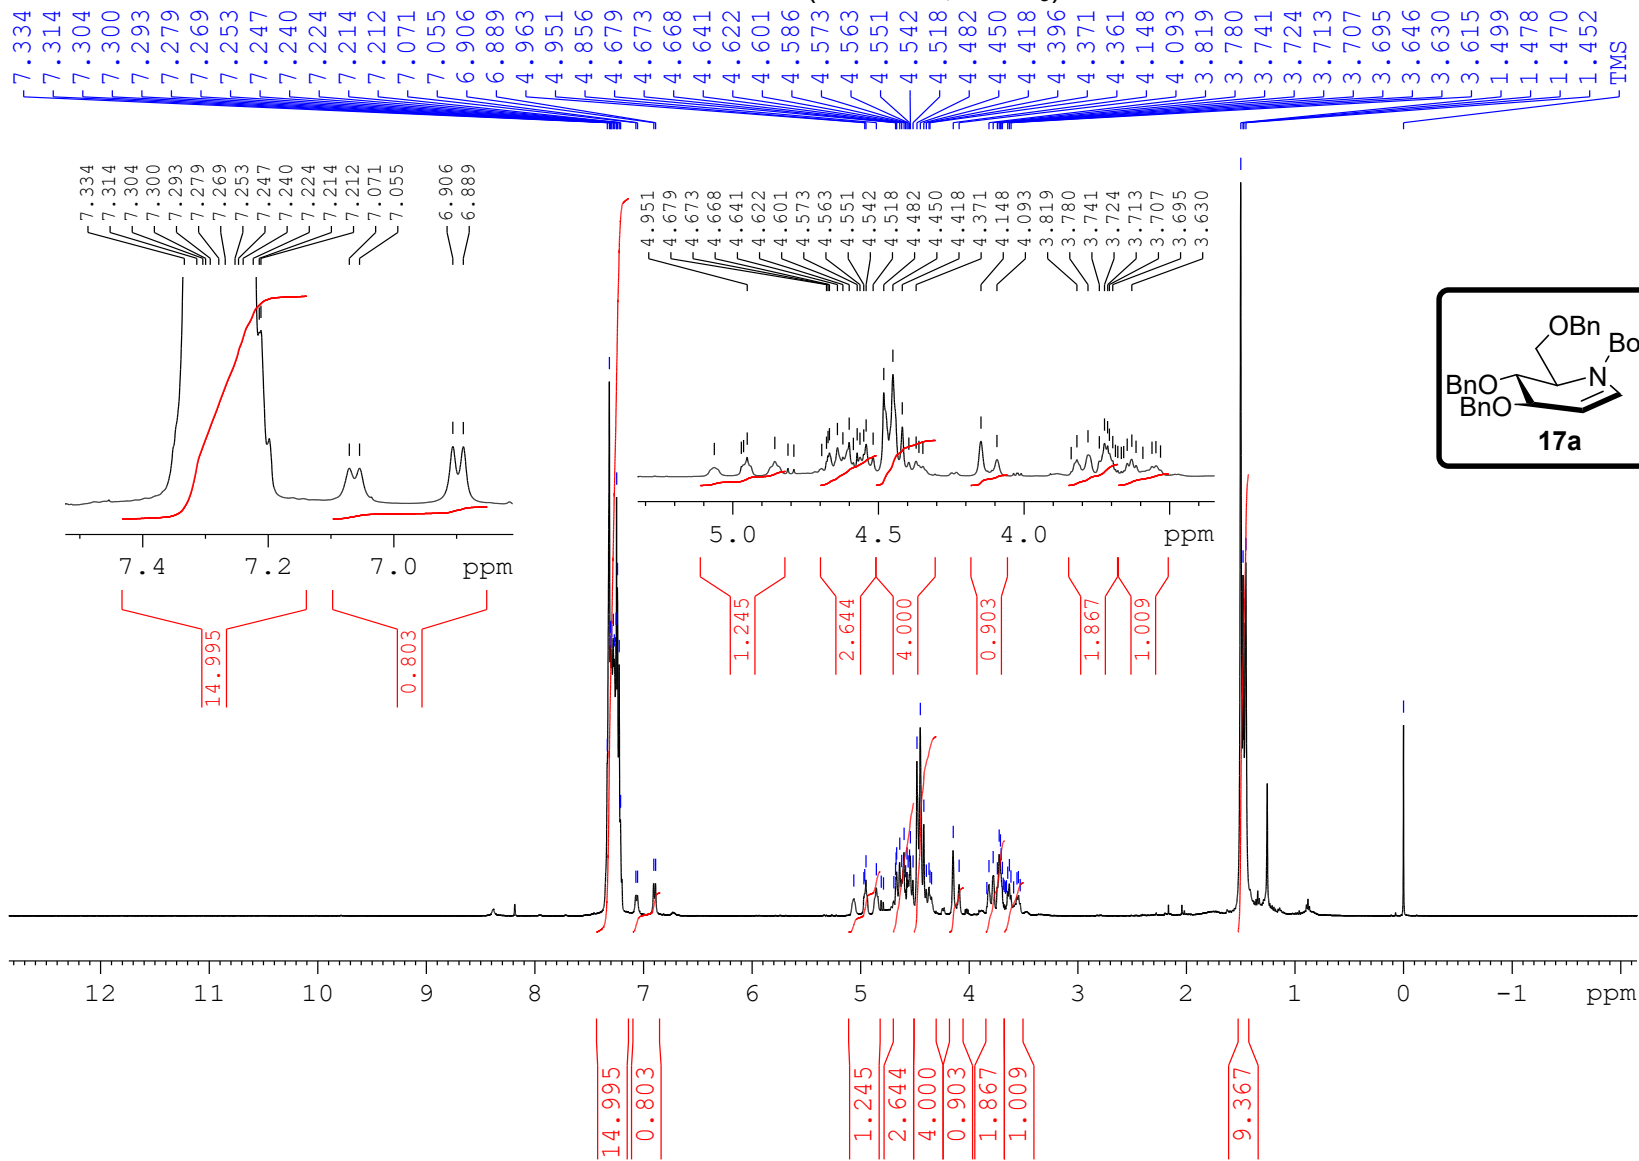

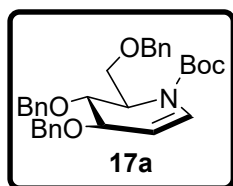

$^{13}\text{C}$  NMR of **17a** (125 MHz,  $\text{CDCl}_3$ )

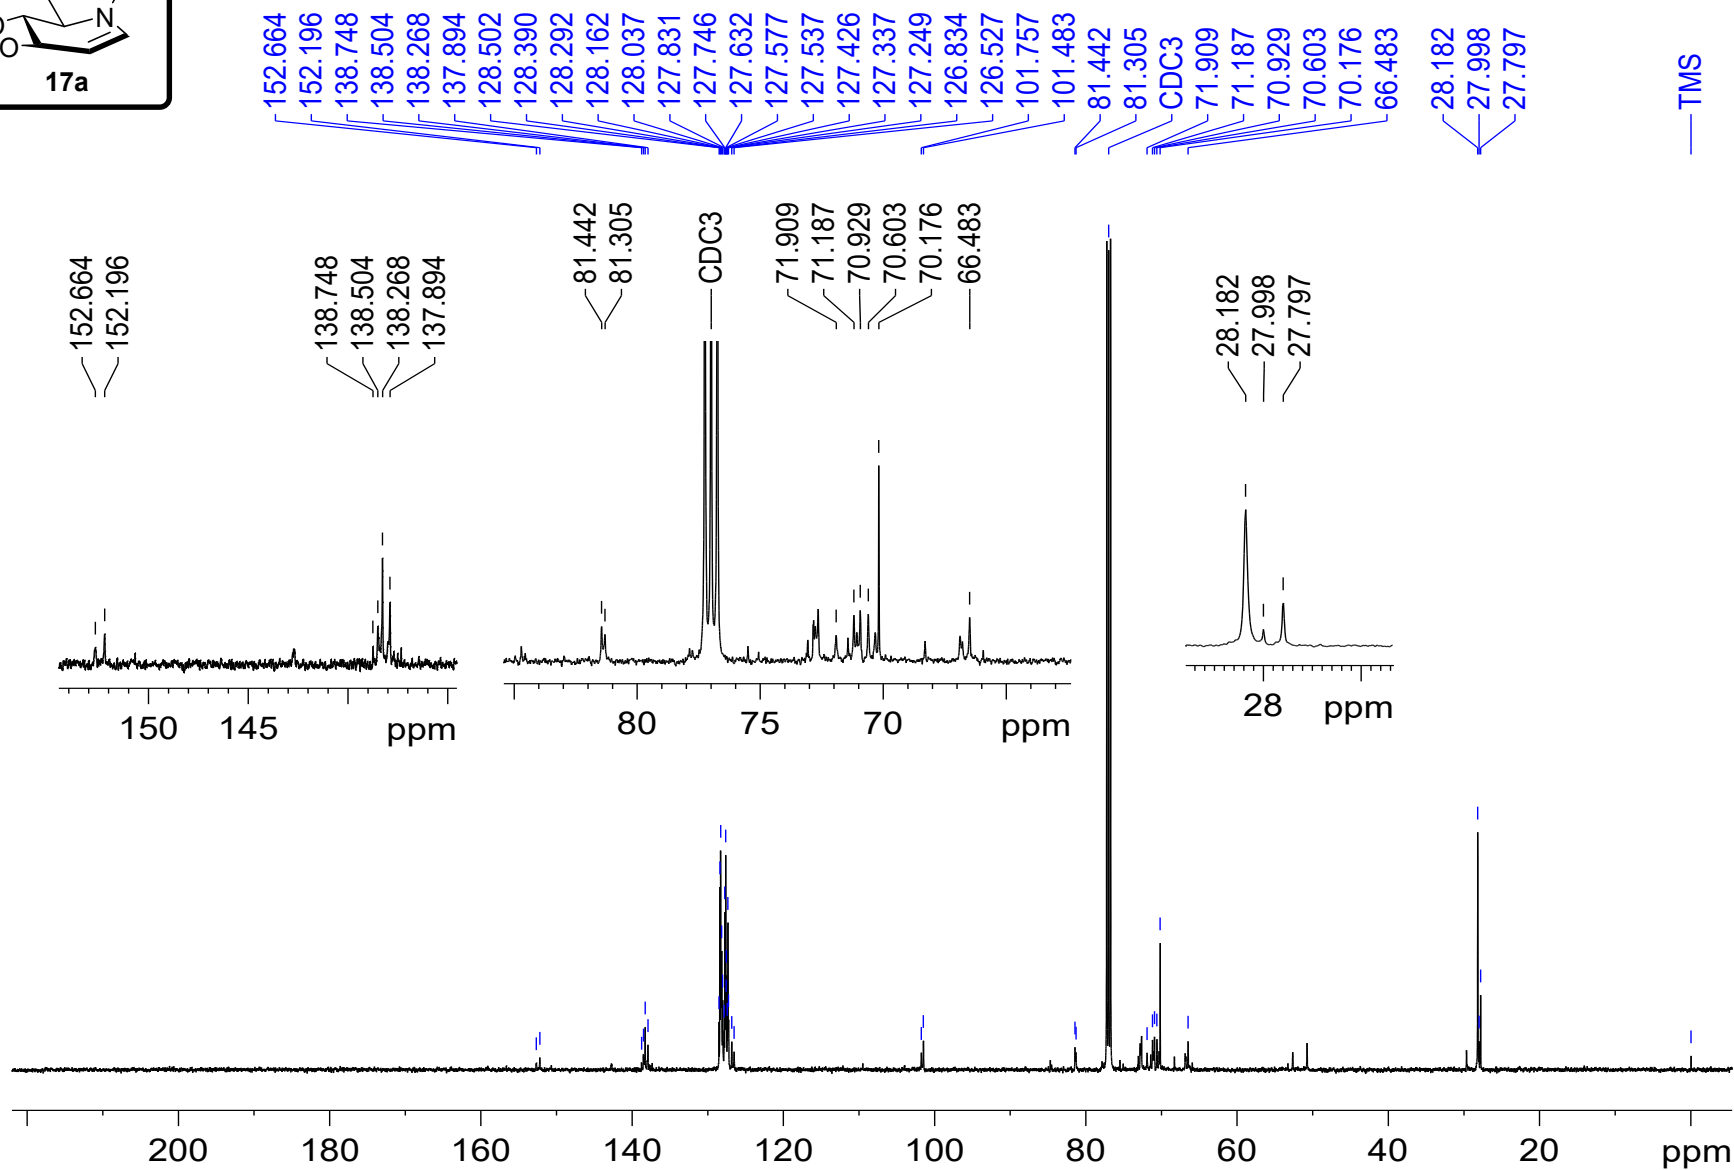

# ESI-MS of 17a

HC-177-a\_120223165956 #7-33 RT: 0.10-0.55 AV: 27 SB: 16 0.02, 0.79-1.03 NL: 2.38E7  
T: {0,0} + c ESI corona sid=40.00 det=1400.00 Full ms [ 100.00-800.00]

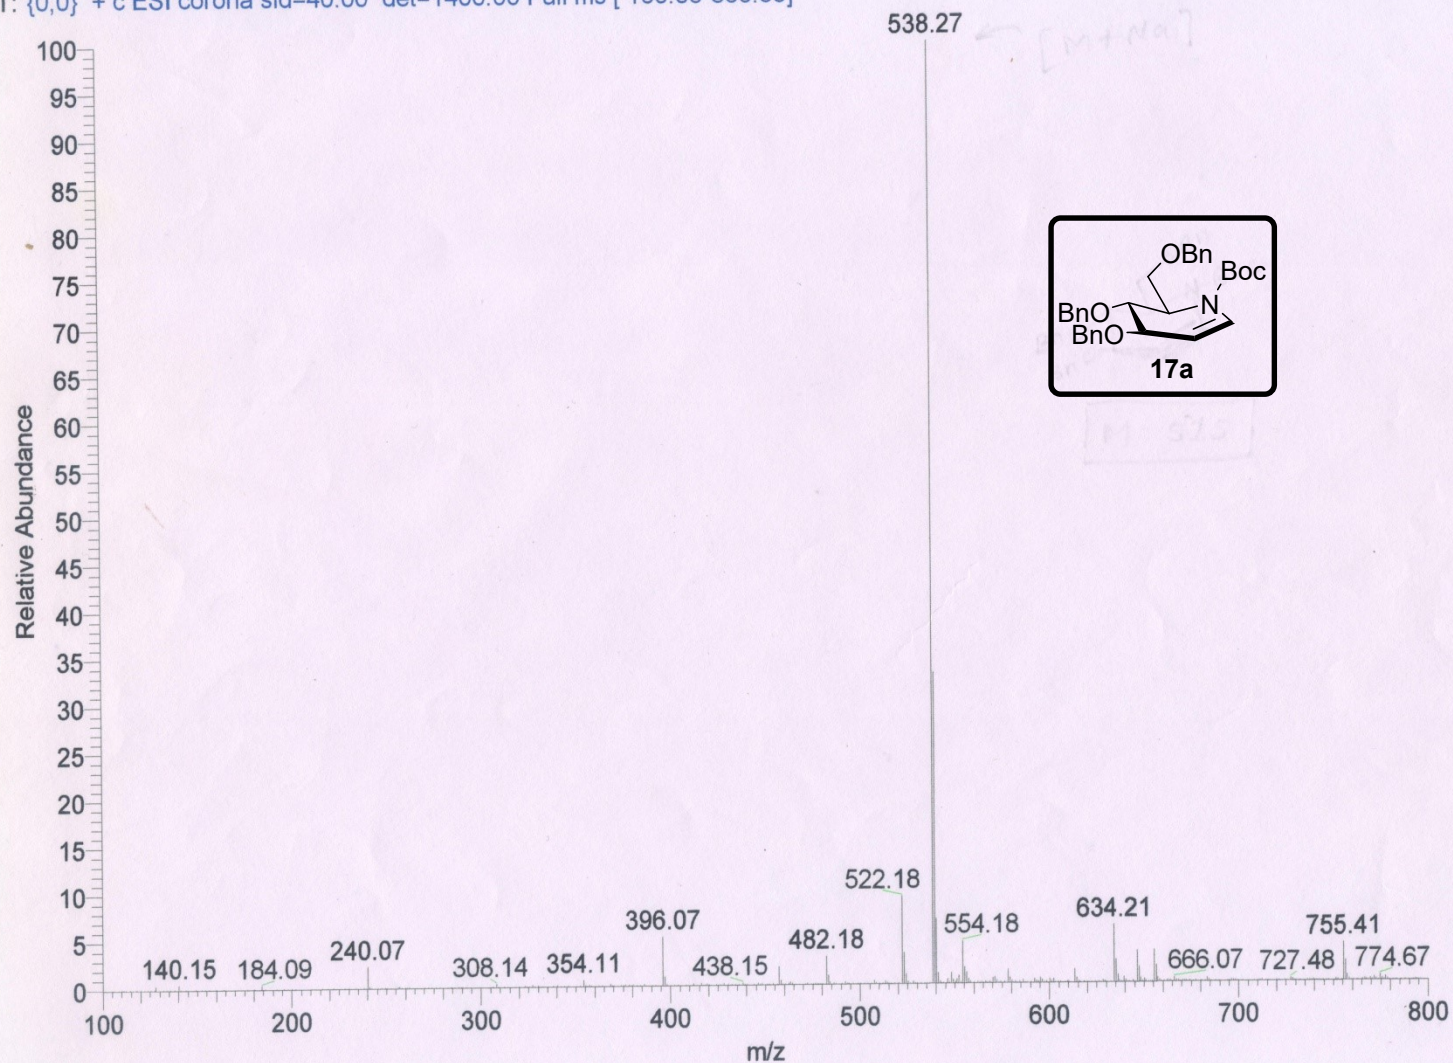

# HRMS (ESI) of 17a

HC177 #1717 RT: 7.65 AV: 1 NL: 3.51E6  
T: FTMS + p ESI Full ms [100.00-700.00]

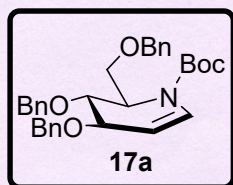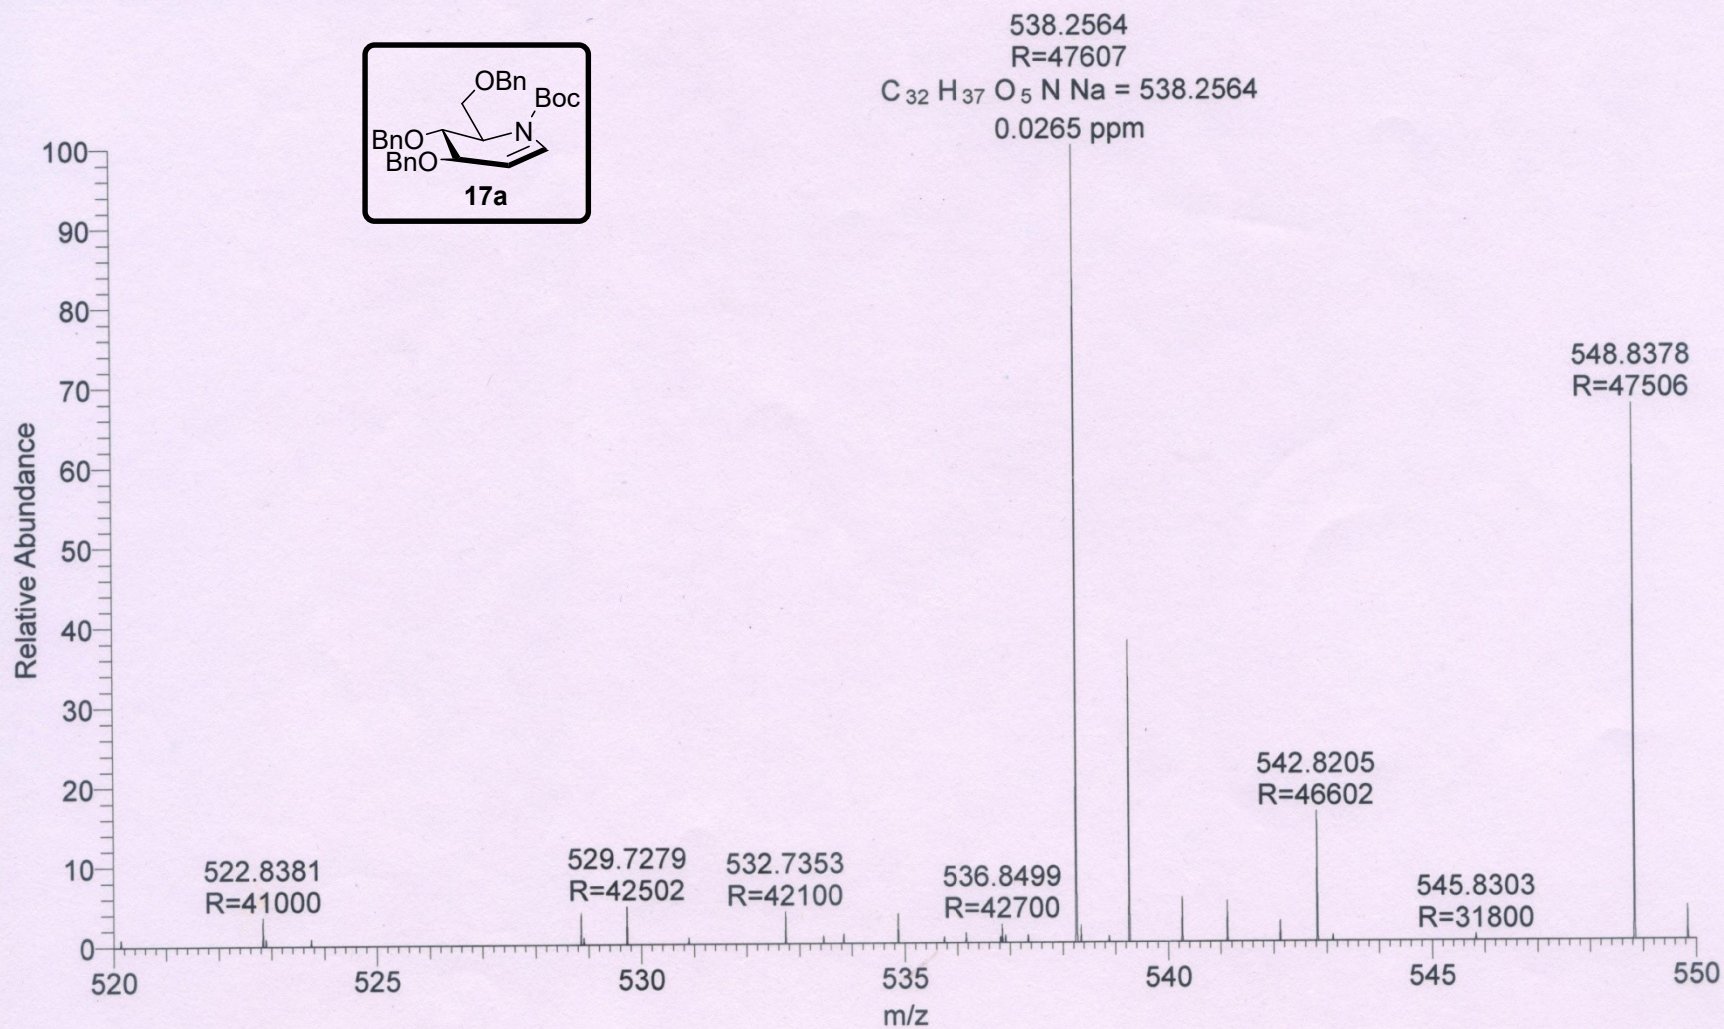

$^1\text{H}$  NMR of **17b** (200 MHz,  $\text{CDCl}_3$ )

215 PMR.esp

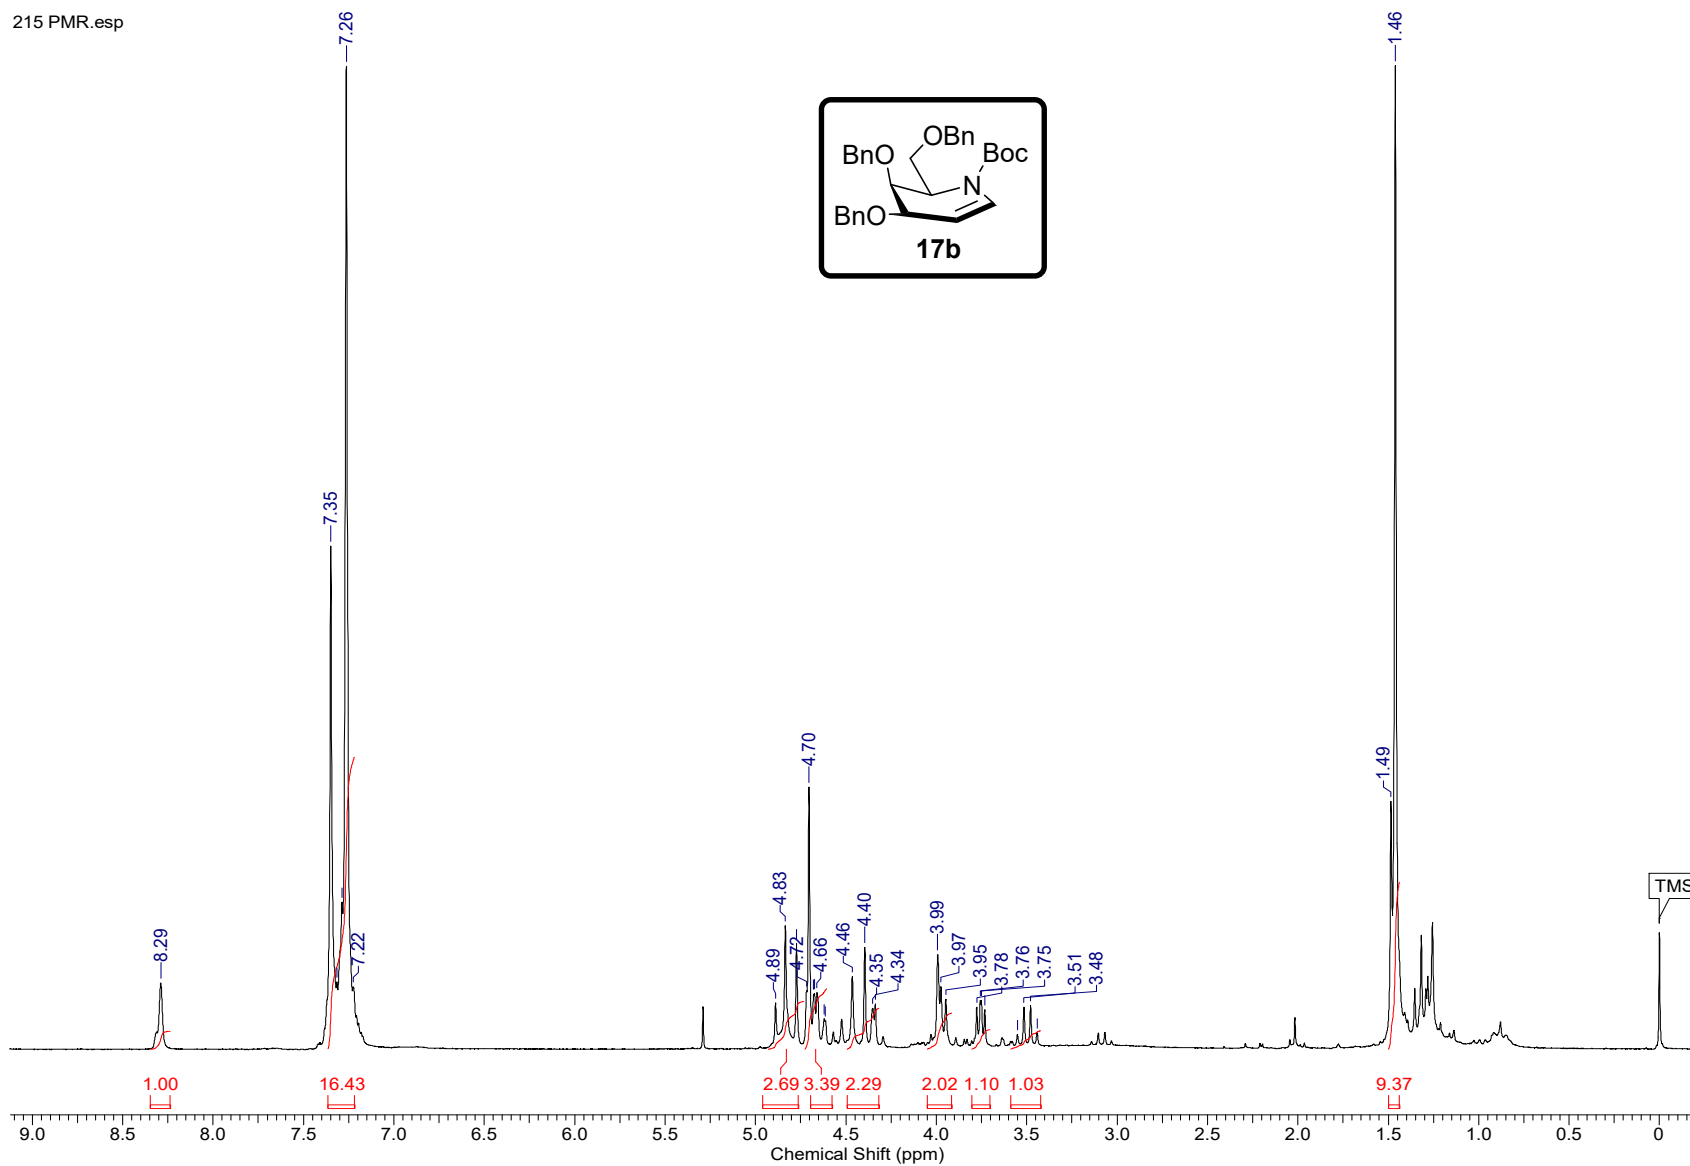

$^{13}\text{C}$  NMR of **17b** (50 MHz,  $\text{CDCl}_3$ )

215 CMR.esp

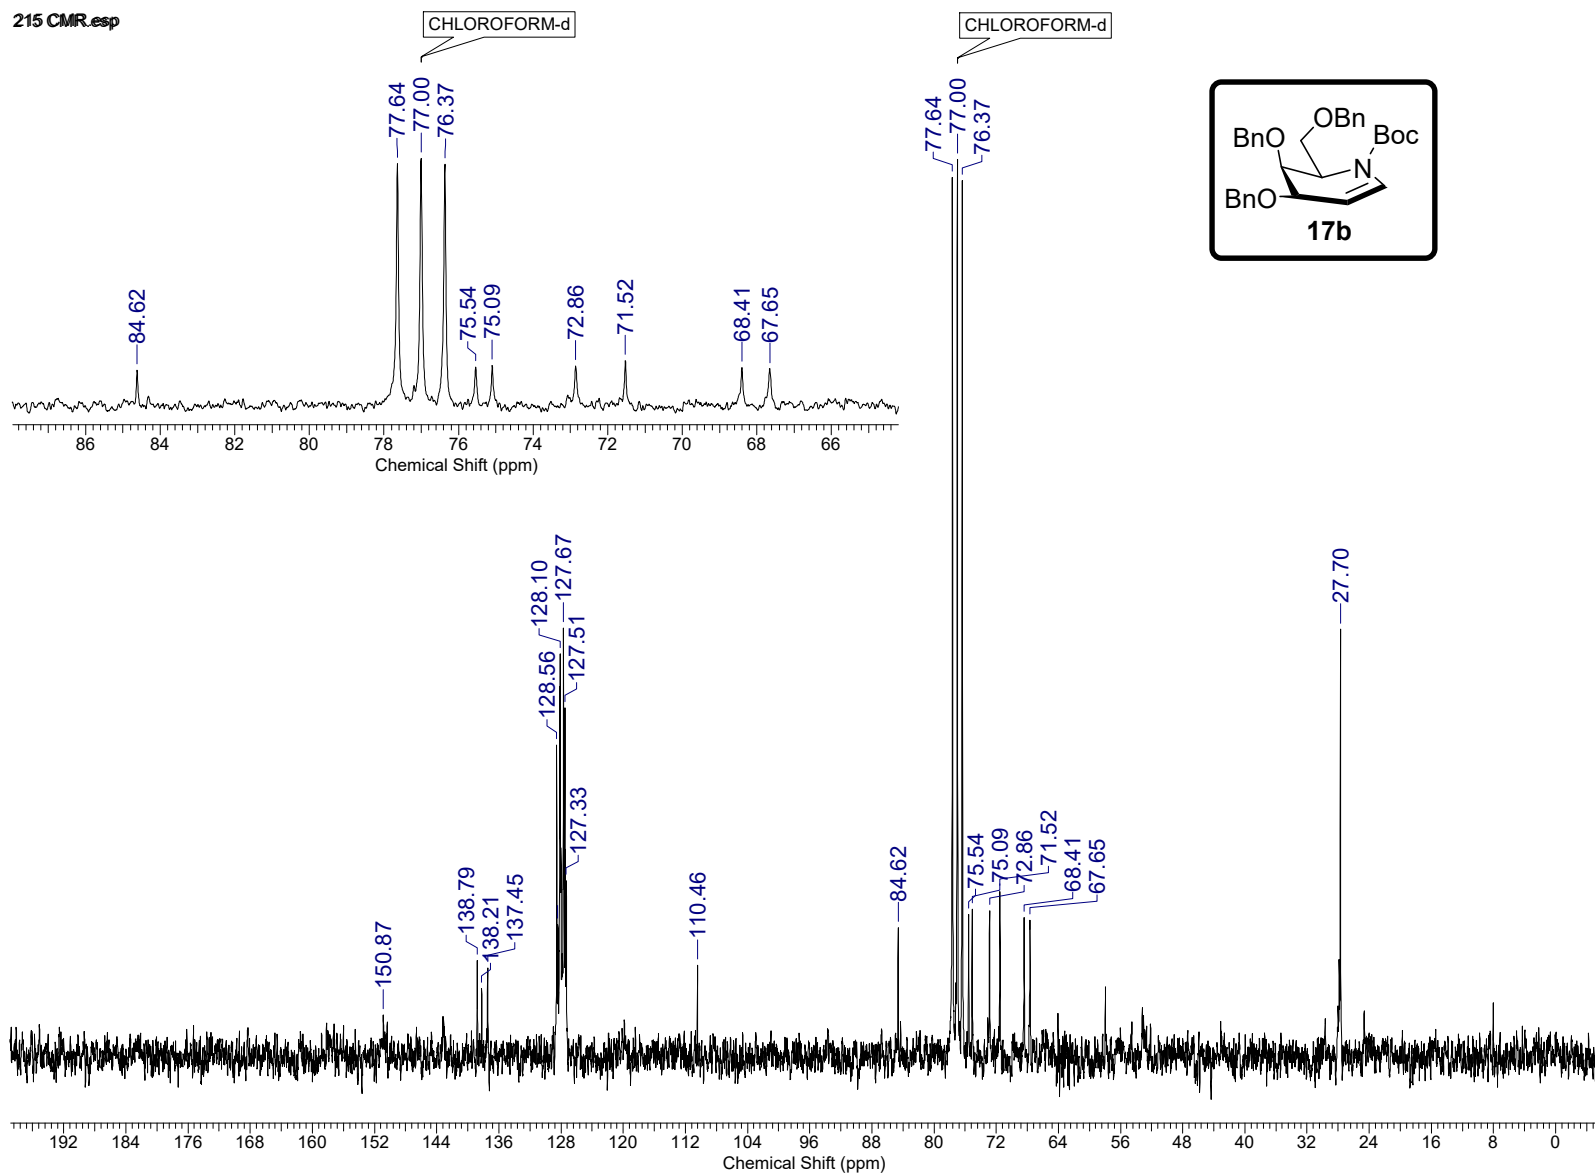

# ESI-MS of 17b

HC-265-r1-b #9-20 RT: 0.14-0.33 AV: 12 SB: 42 0.00-0.12, 0.35-0.92 NL: 1.97E6  
T: {0,0} + c ESI corona sid=80.00 det=1600.00 Full ms [ 100.00-2000.00]

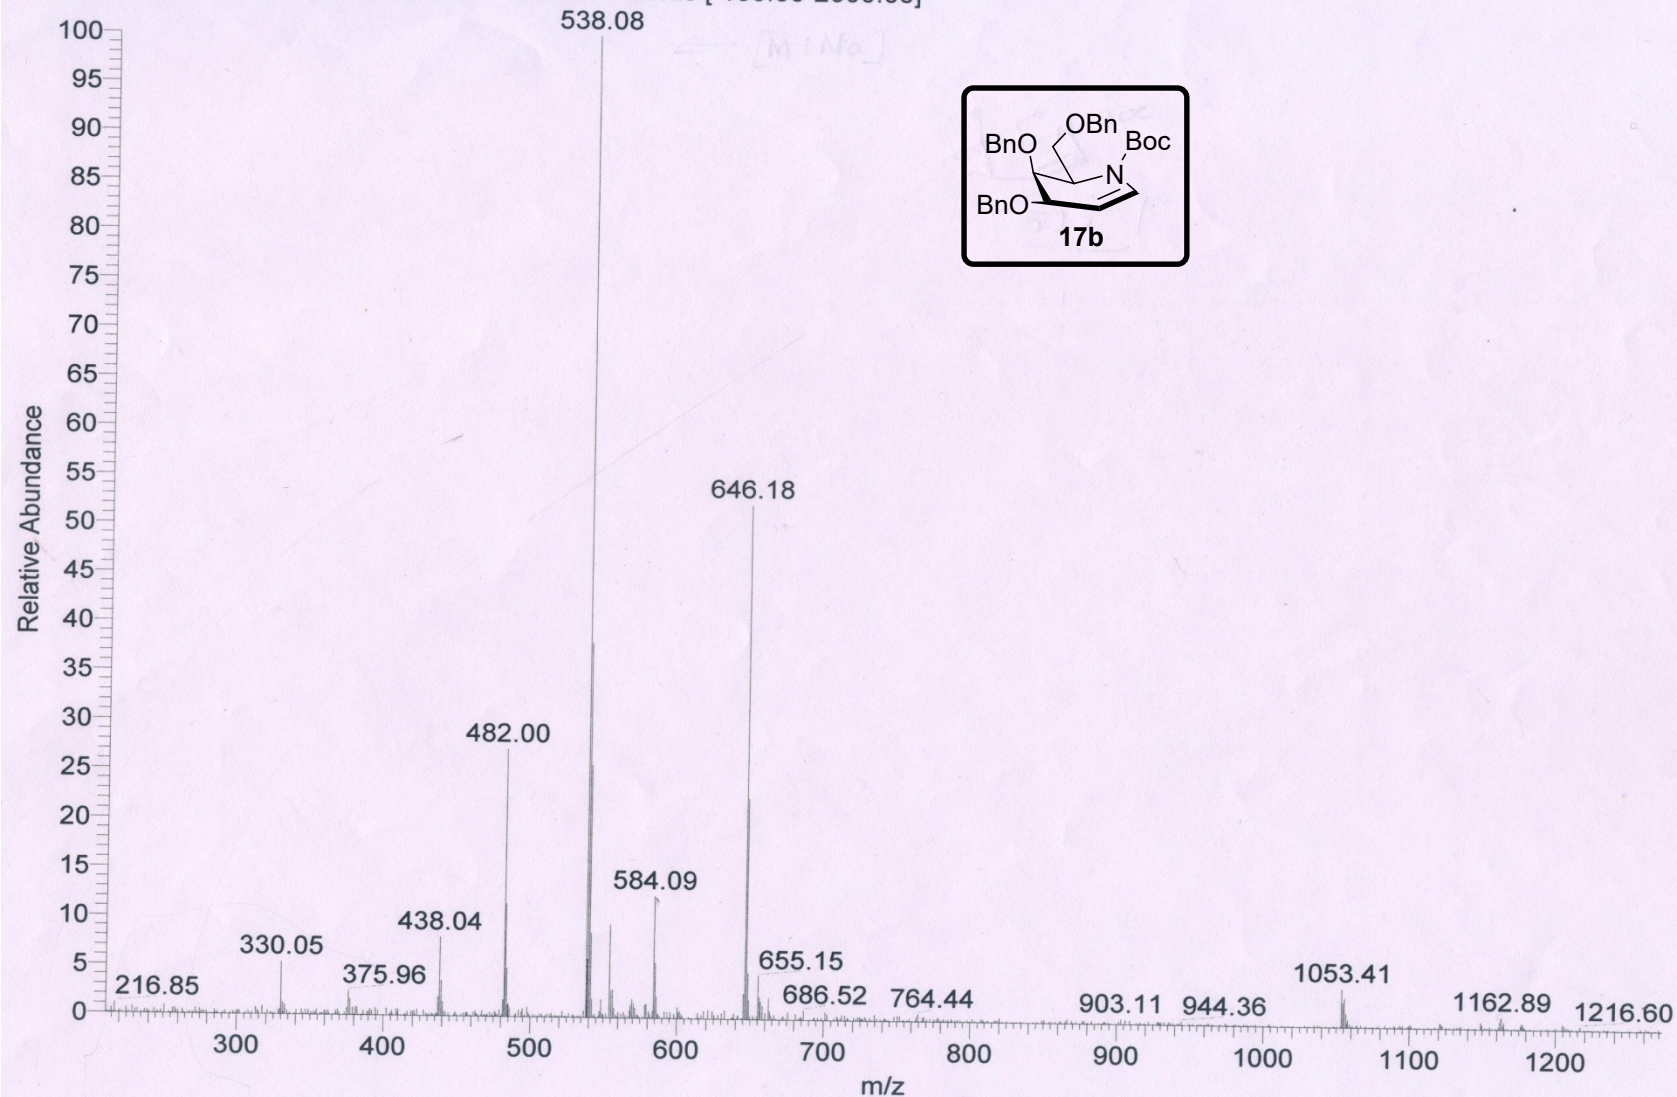

HRMS (ESI) of **17b**

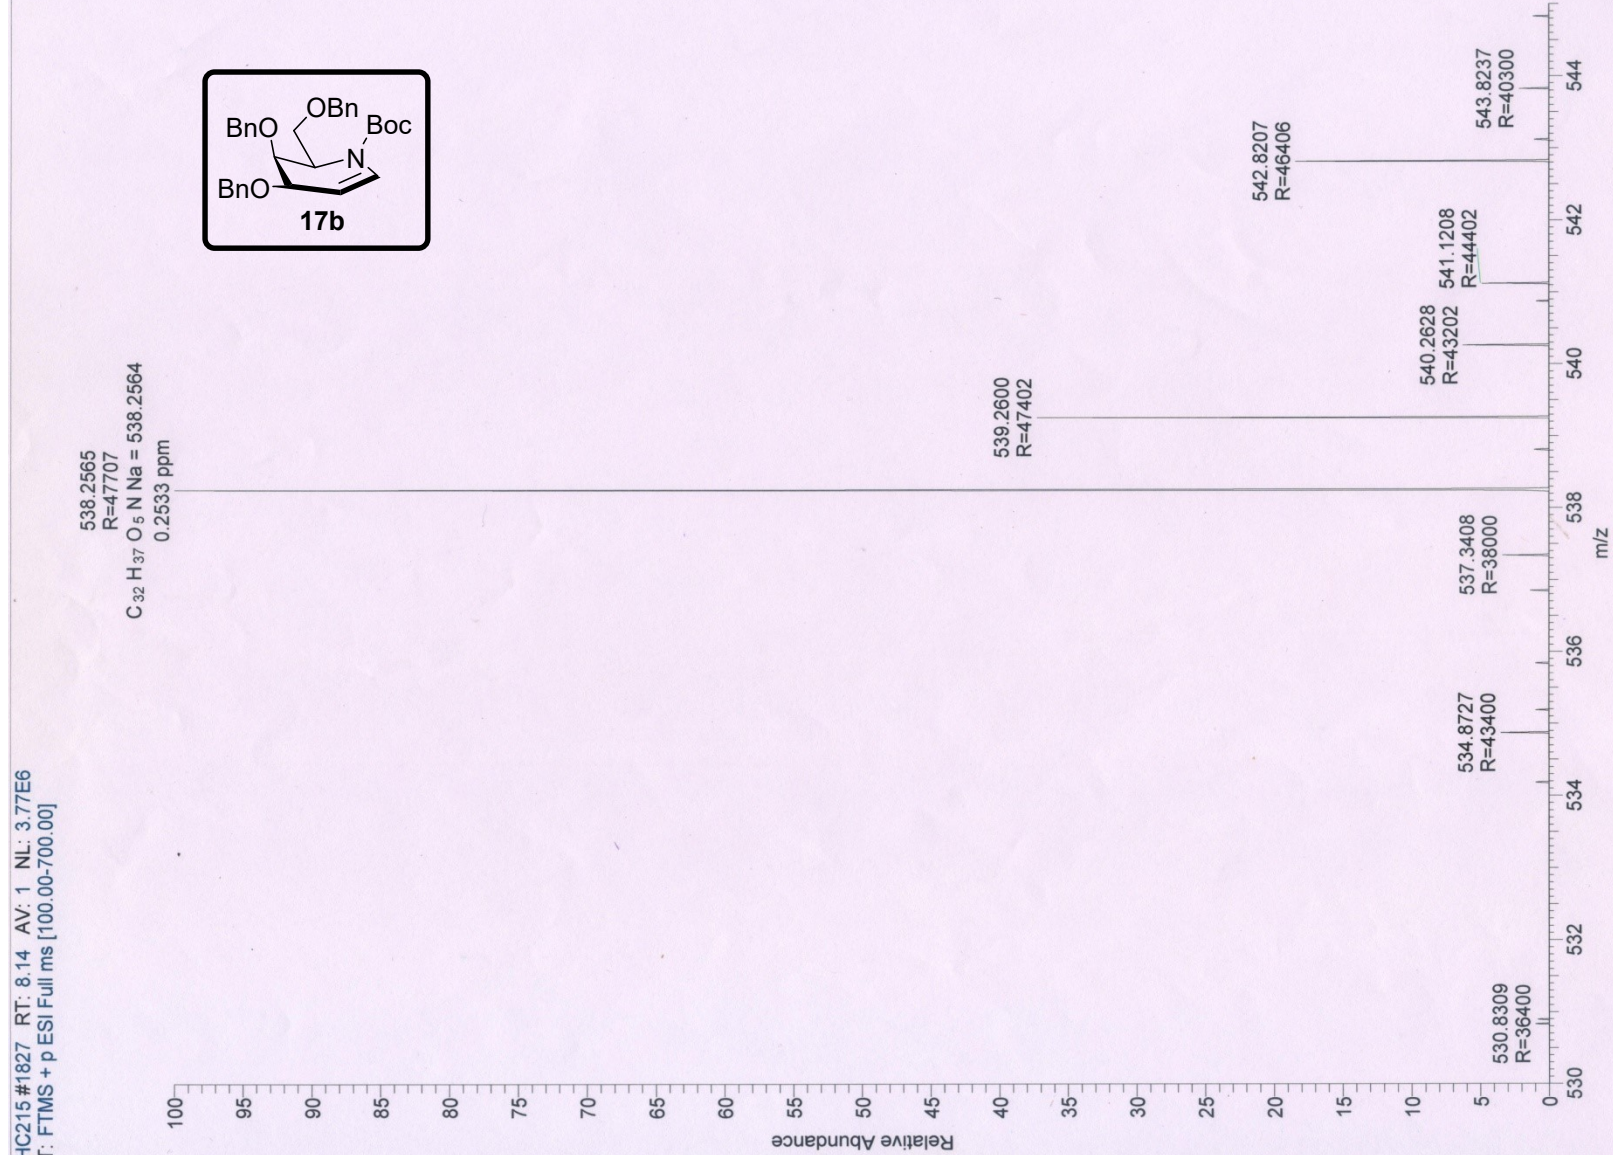



<sup>1</sup>H NMR of **22** (200MHz, CDCl<sub>3</sub>)

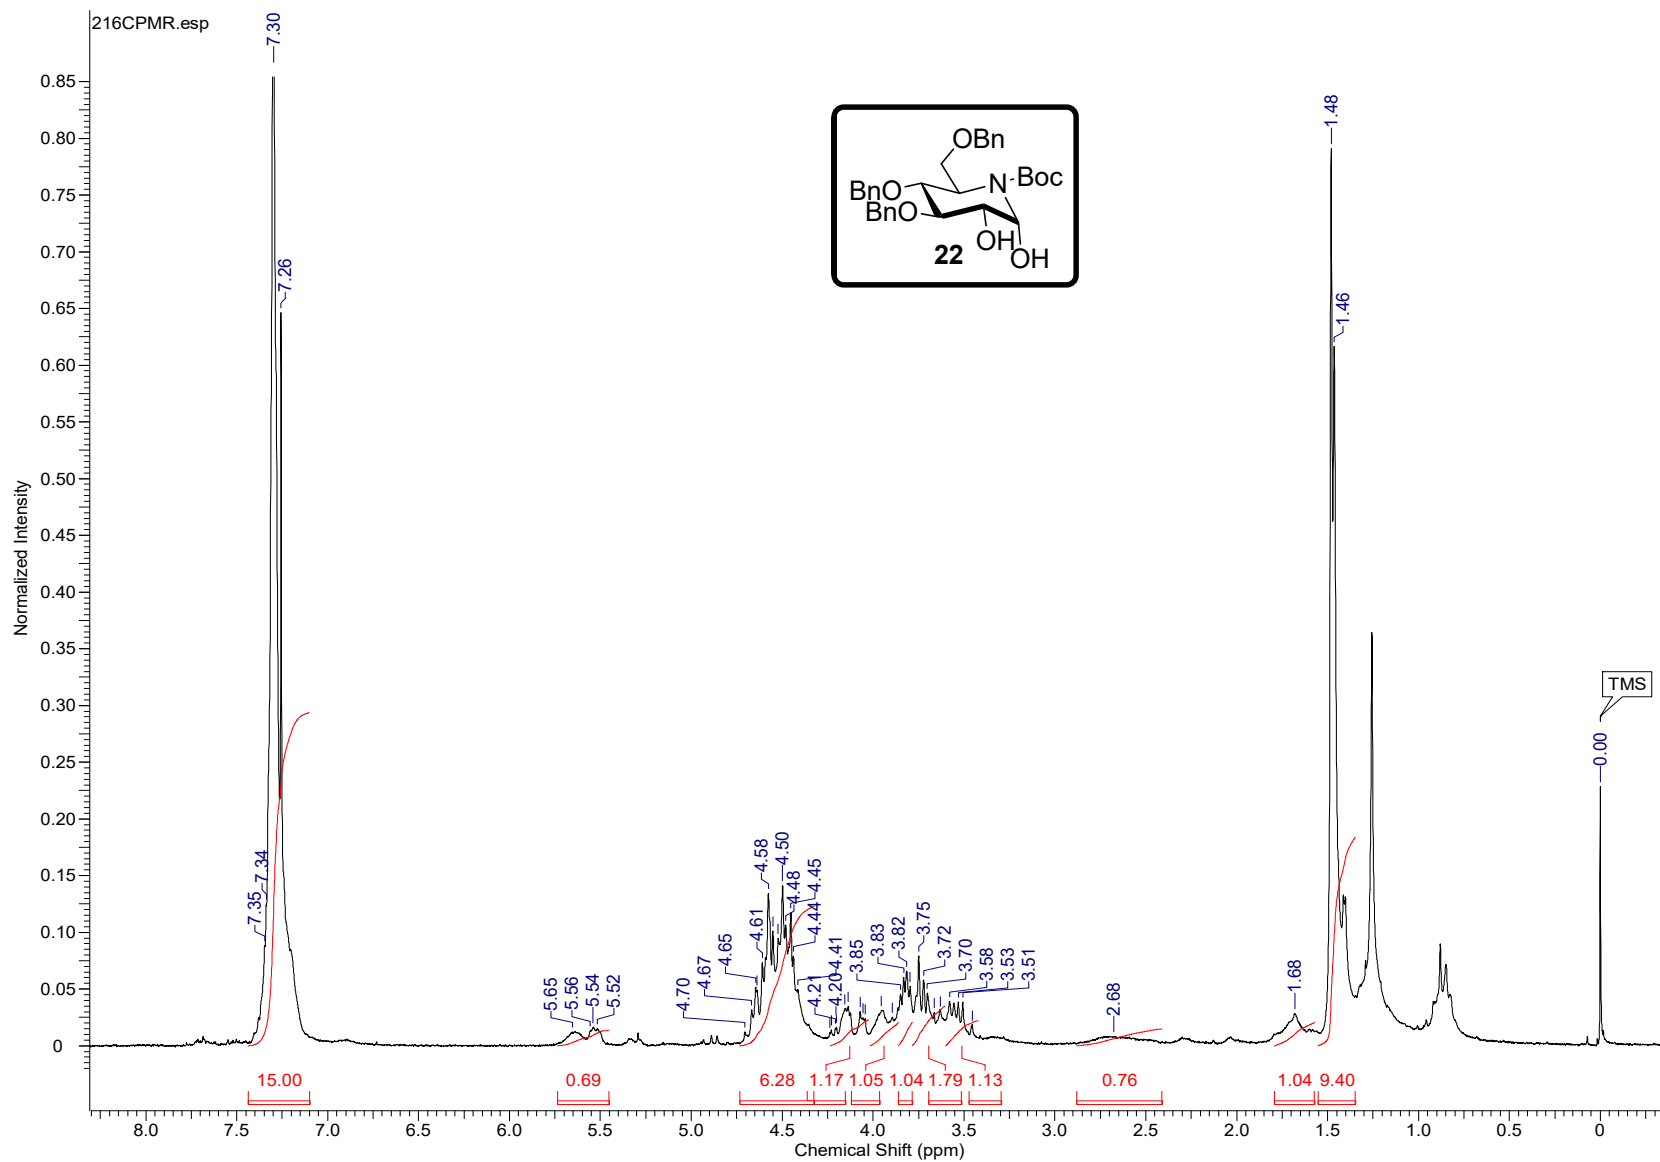

$^{13}\text{C}$  NMR of **22** (50MHz,  $\text{CDCl}_3$ )

216rbC.esp

216rbC.esp

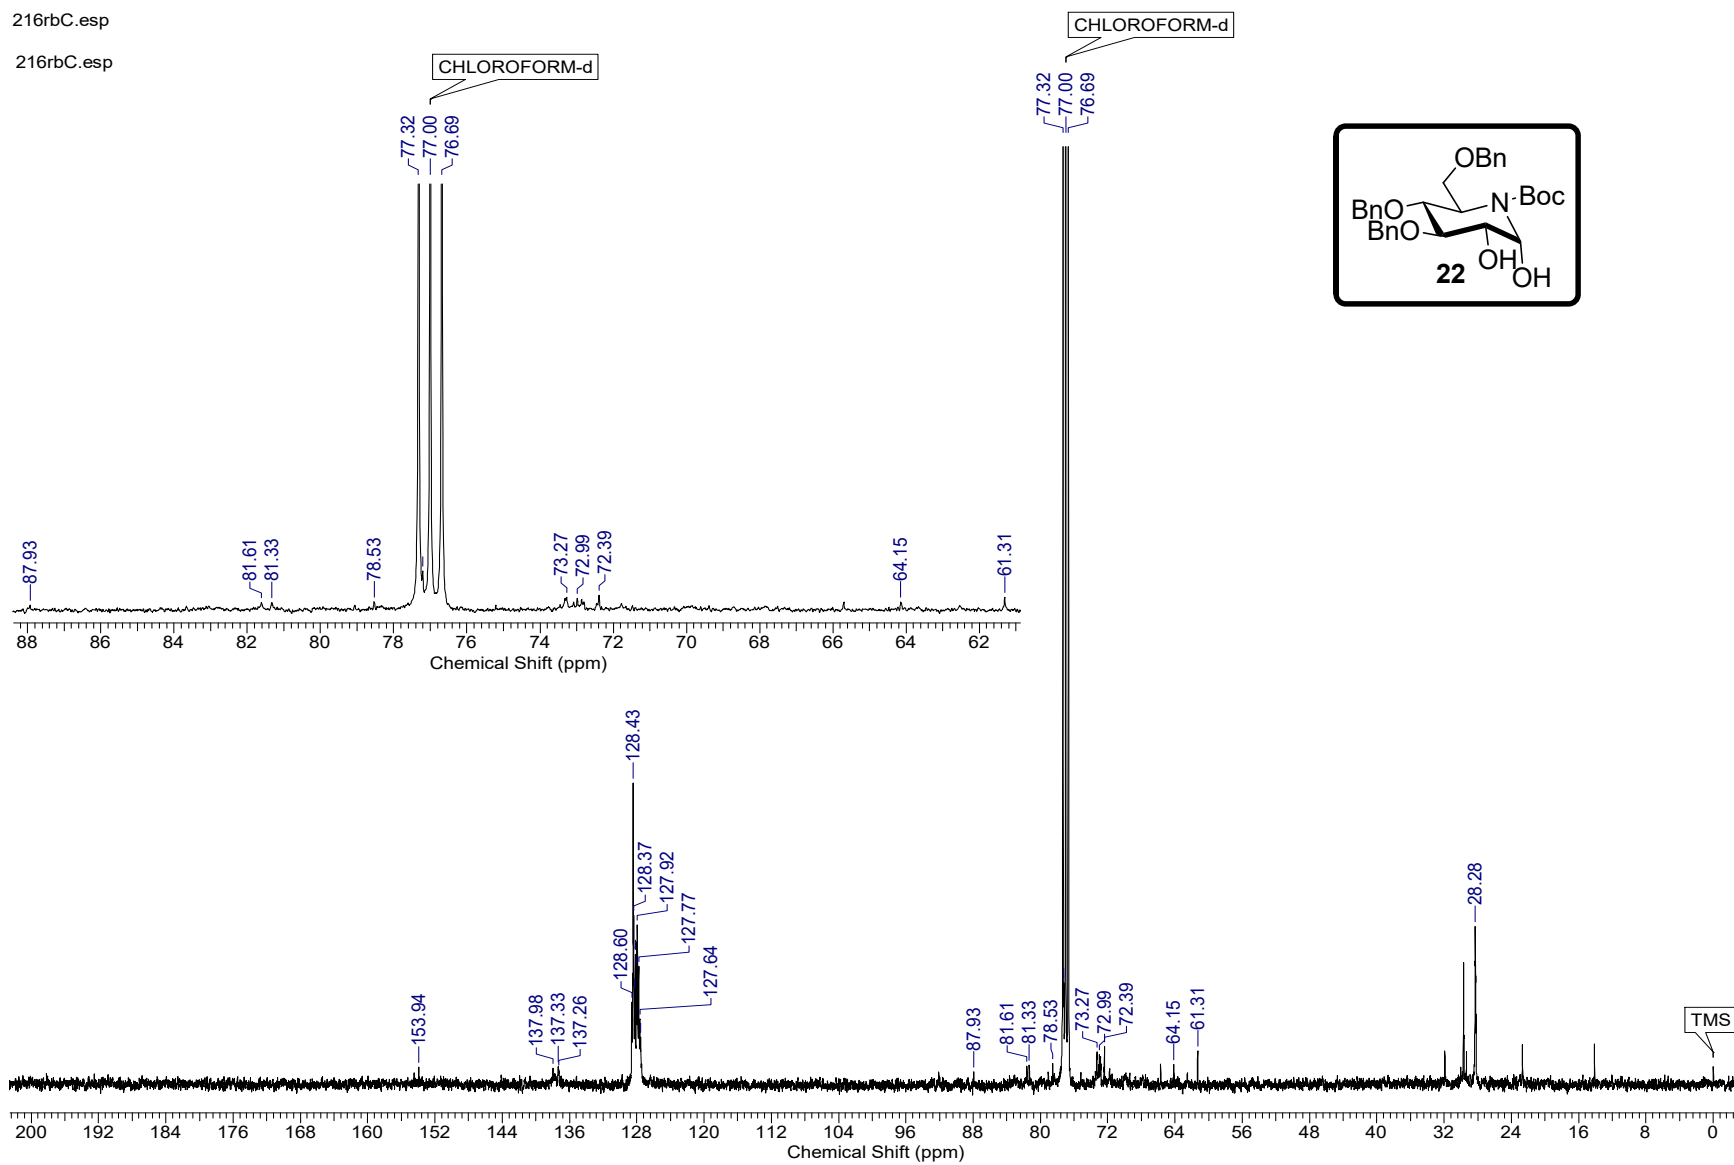

# DEPT of **22** (100MHz, CDCl<sub>3</sub>)

216rbDEPT135.esp

216rbDEPT135.esp

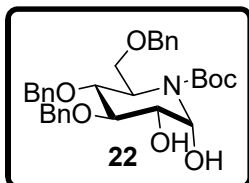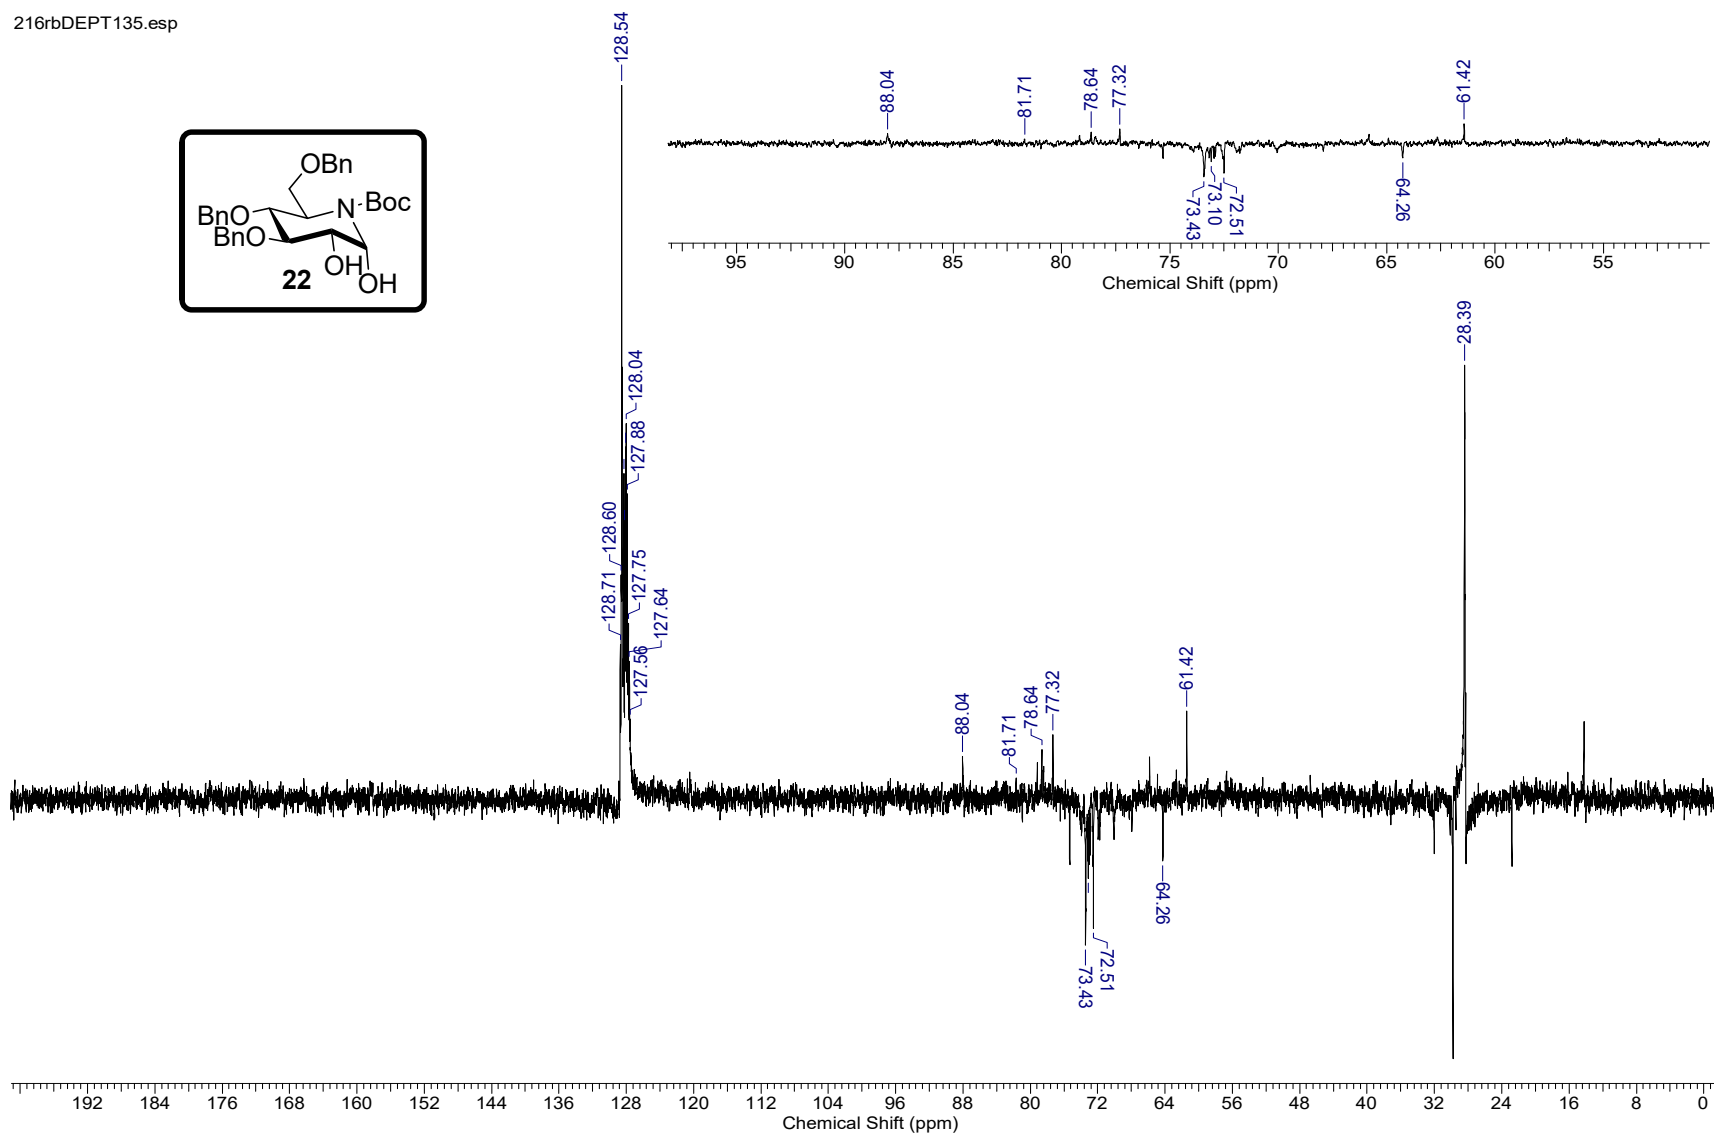

# ESI-MS of 22

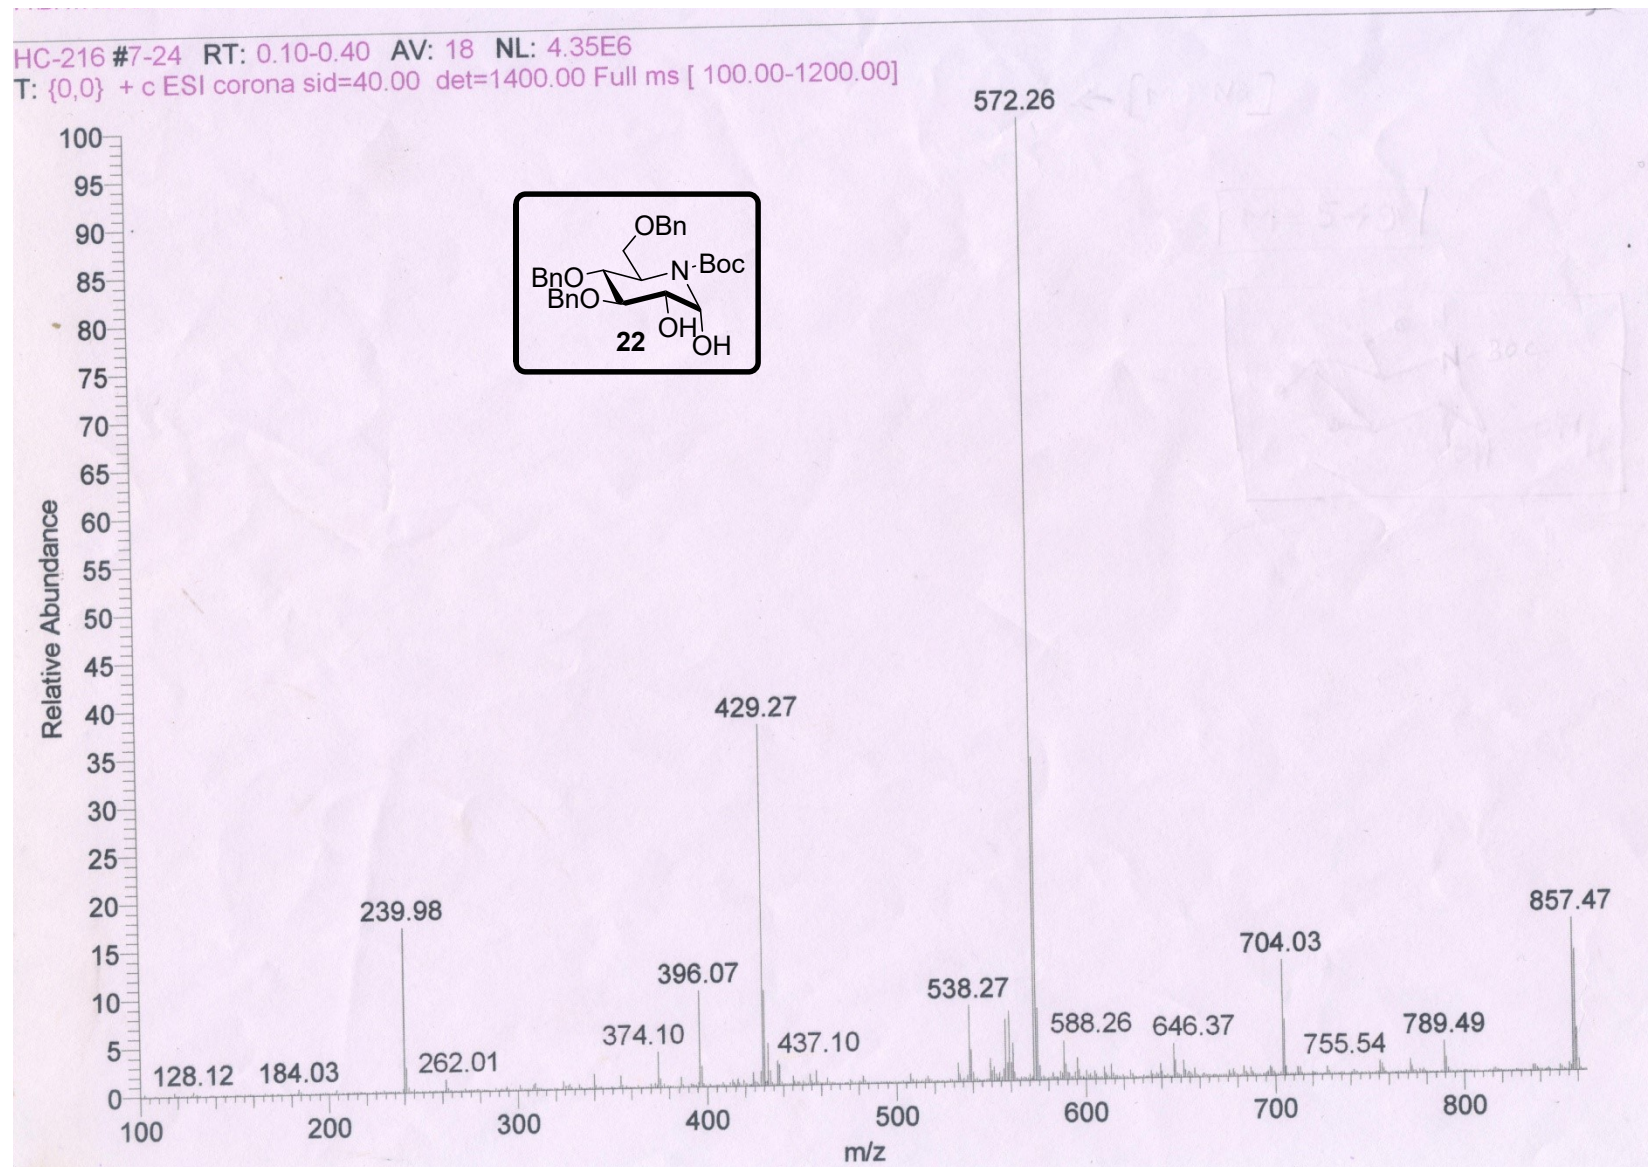

HRMS (ESI) of **22**

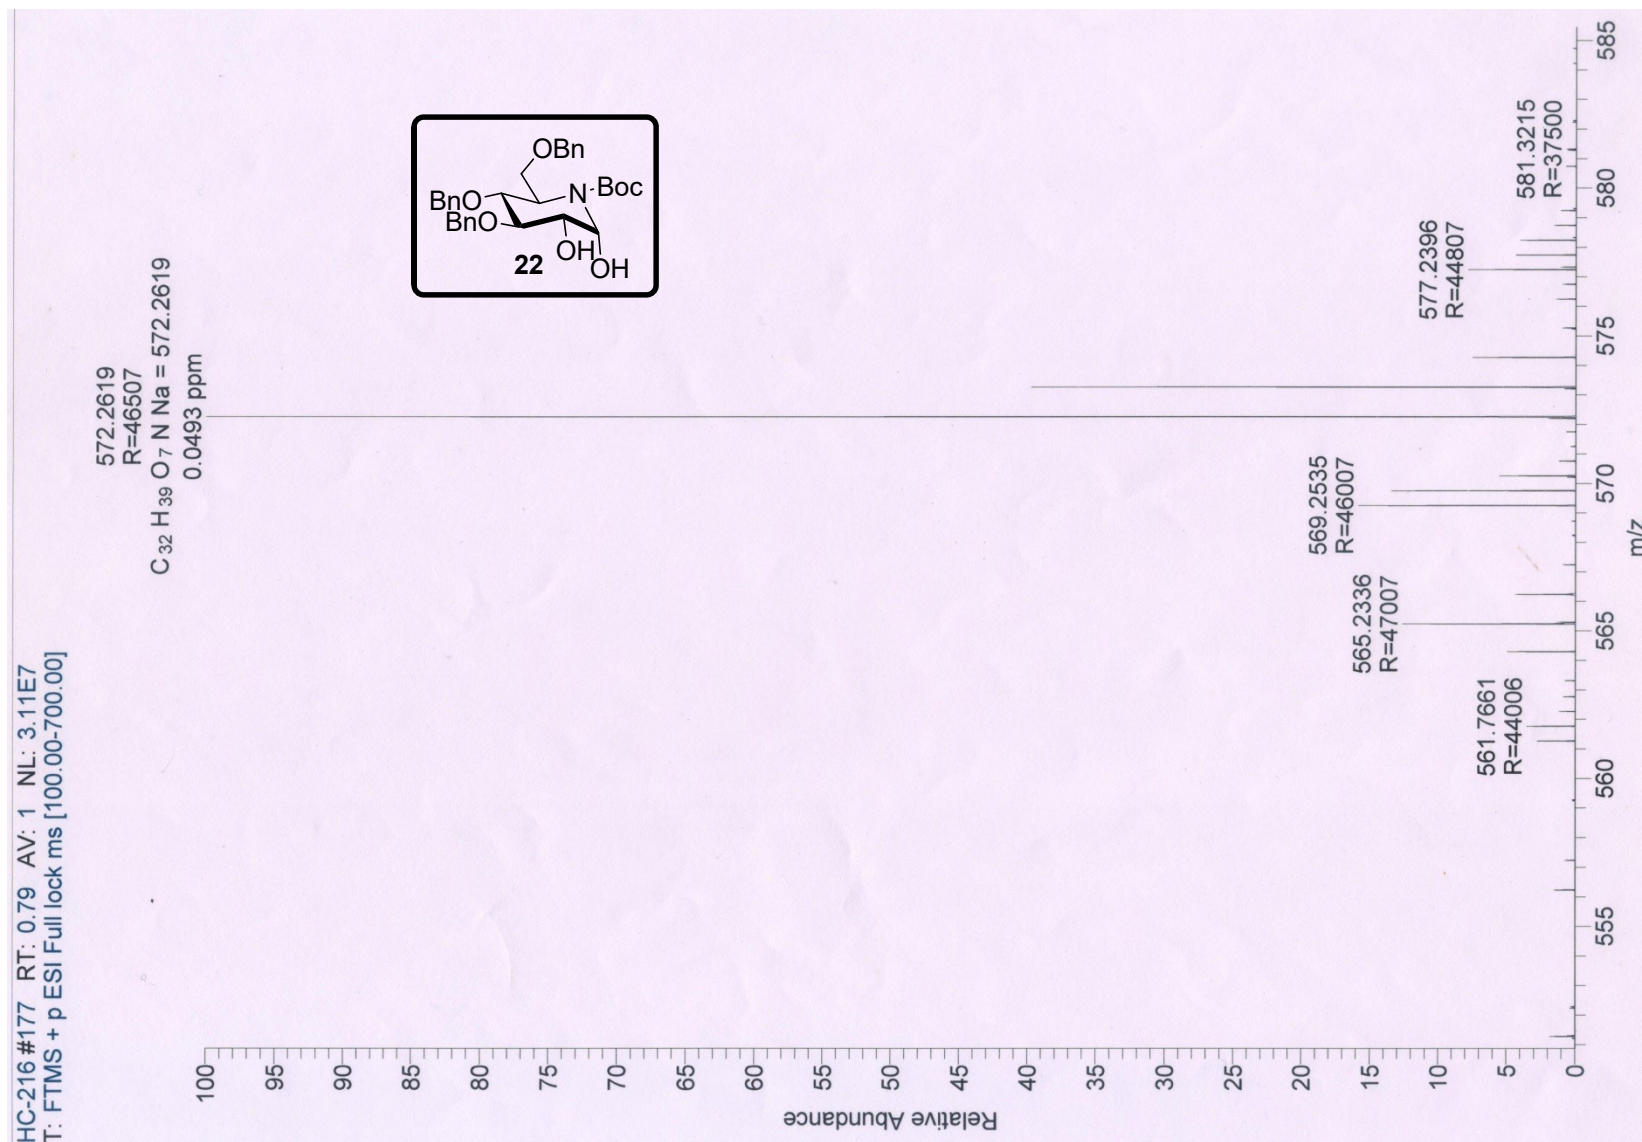

<sup>1</sup>H NMR of **23** (400MHz, CDCl<sub>3</sub>)

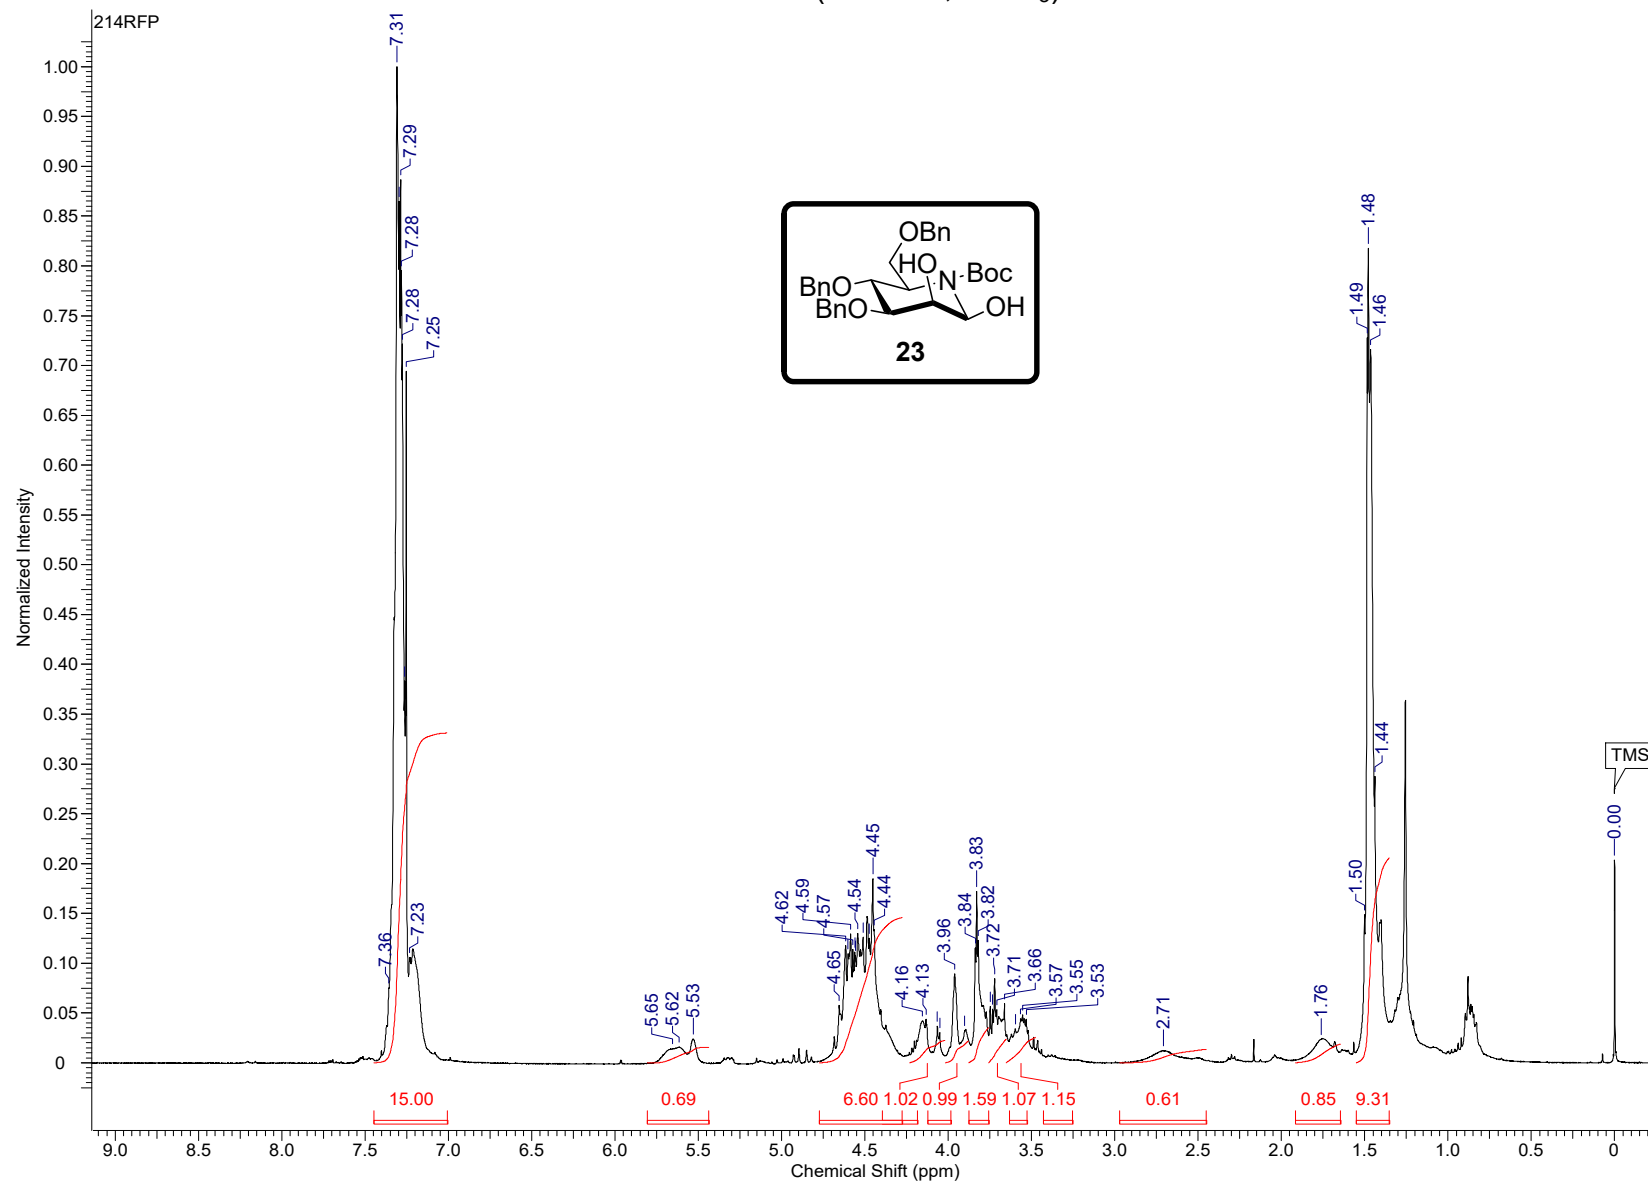

<sup>13</sup>C NMR of **23** (100MHz, CDCl<sub>3</sub>)

214RFC.esp  
214RFC.esp

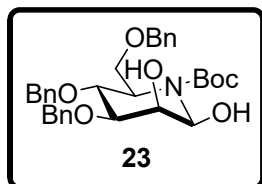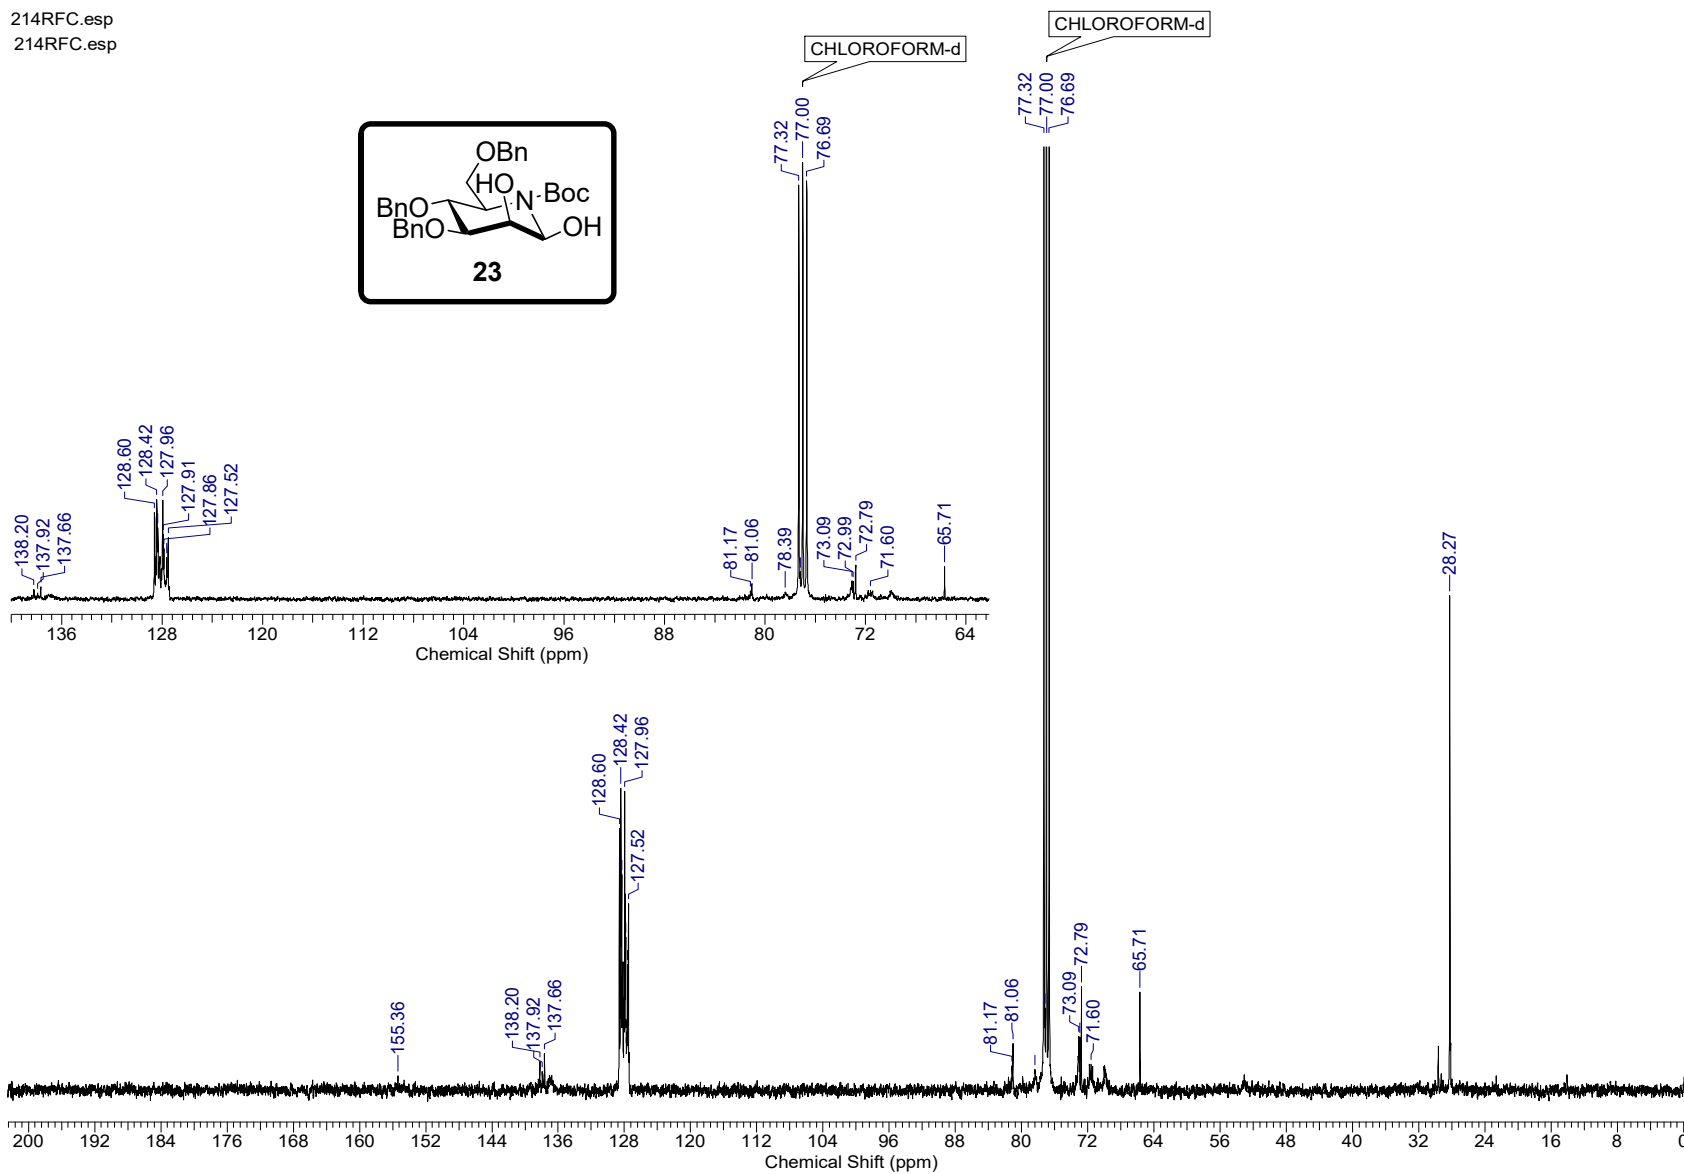



DEPT of **23** (100MHz, CDCl<sub>3</sub>)

214RFD.ESP

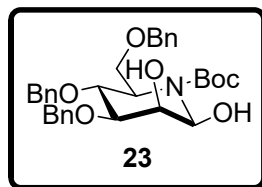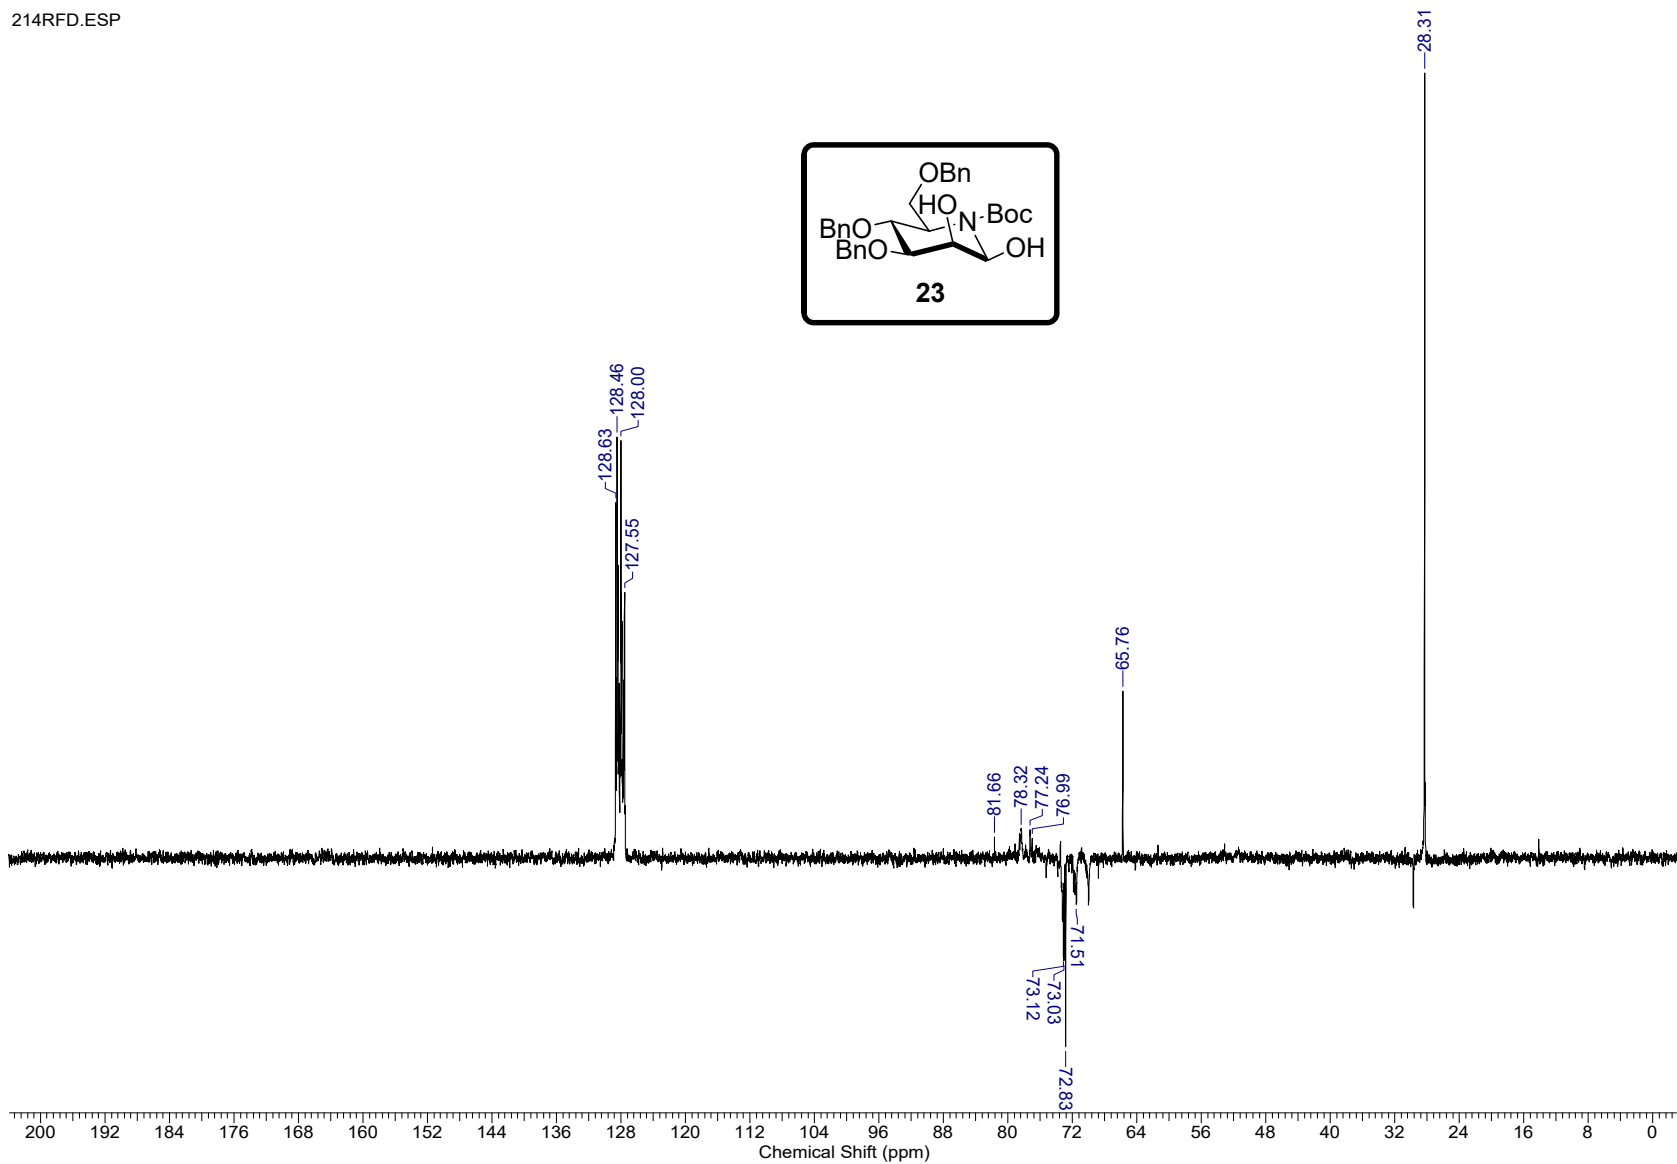

# ESI-MS of 23

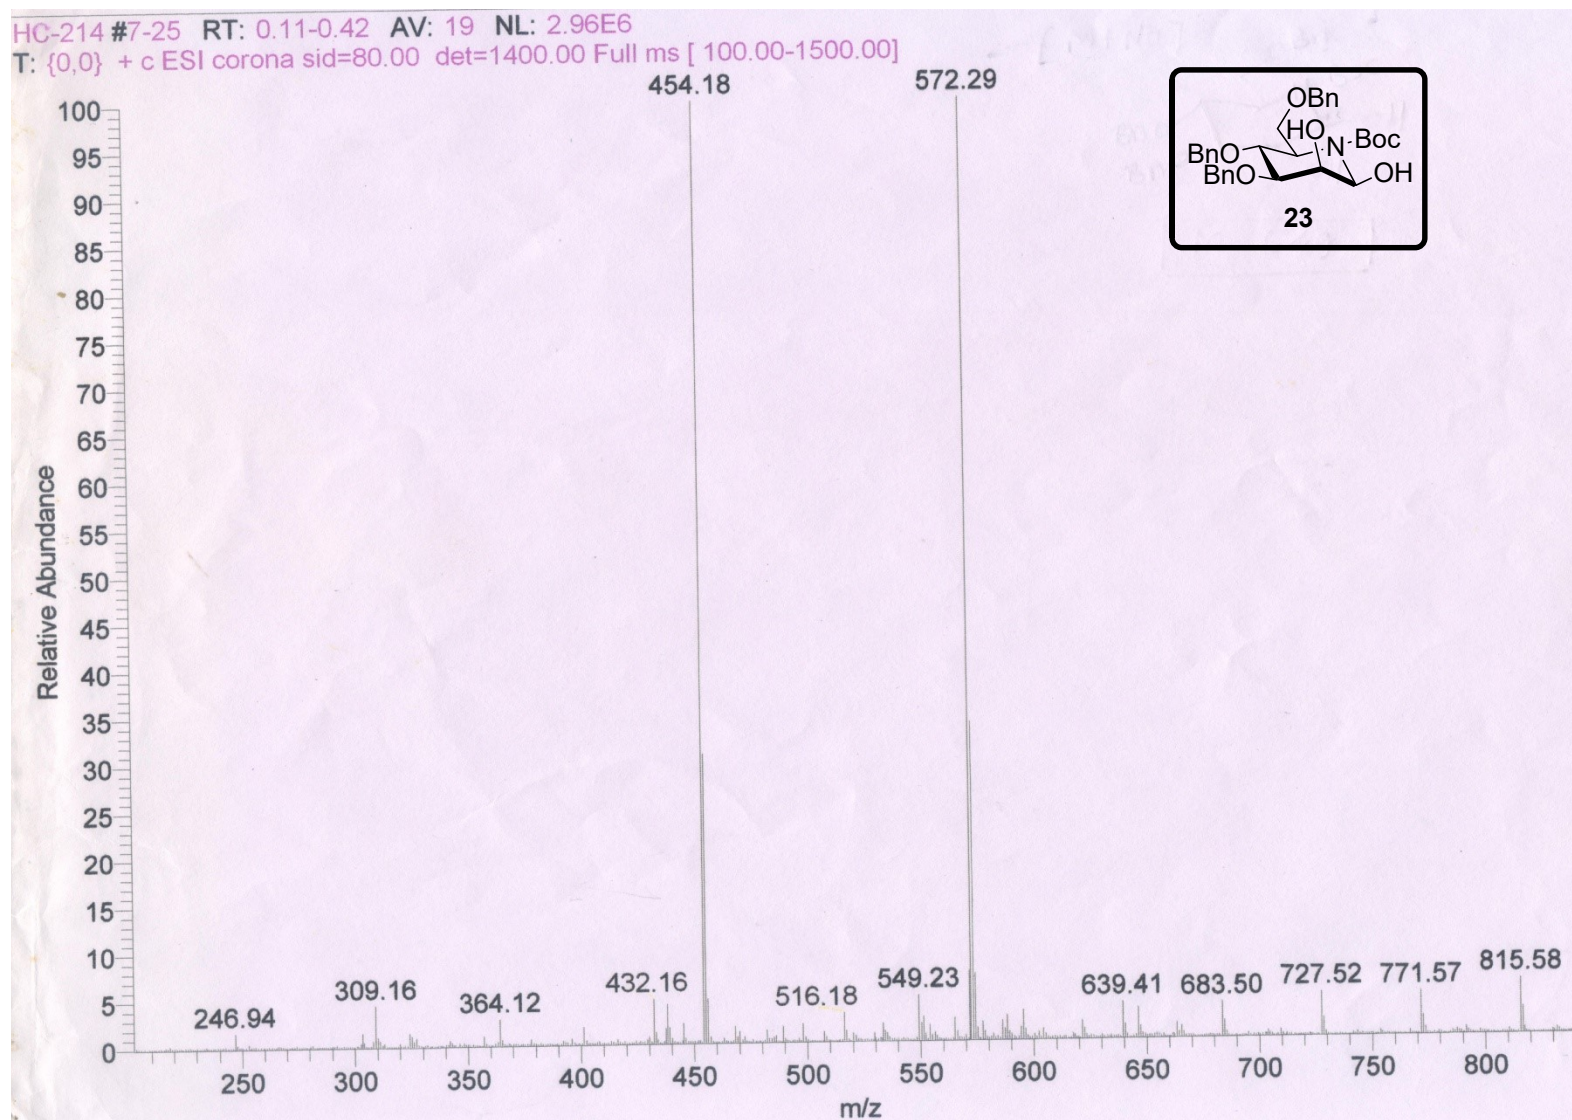

HRMS (ESI) of **23**

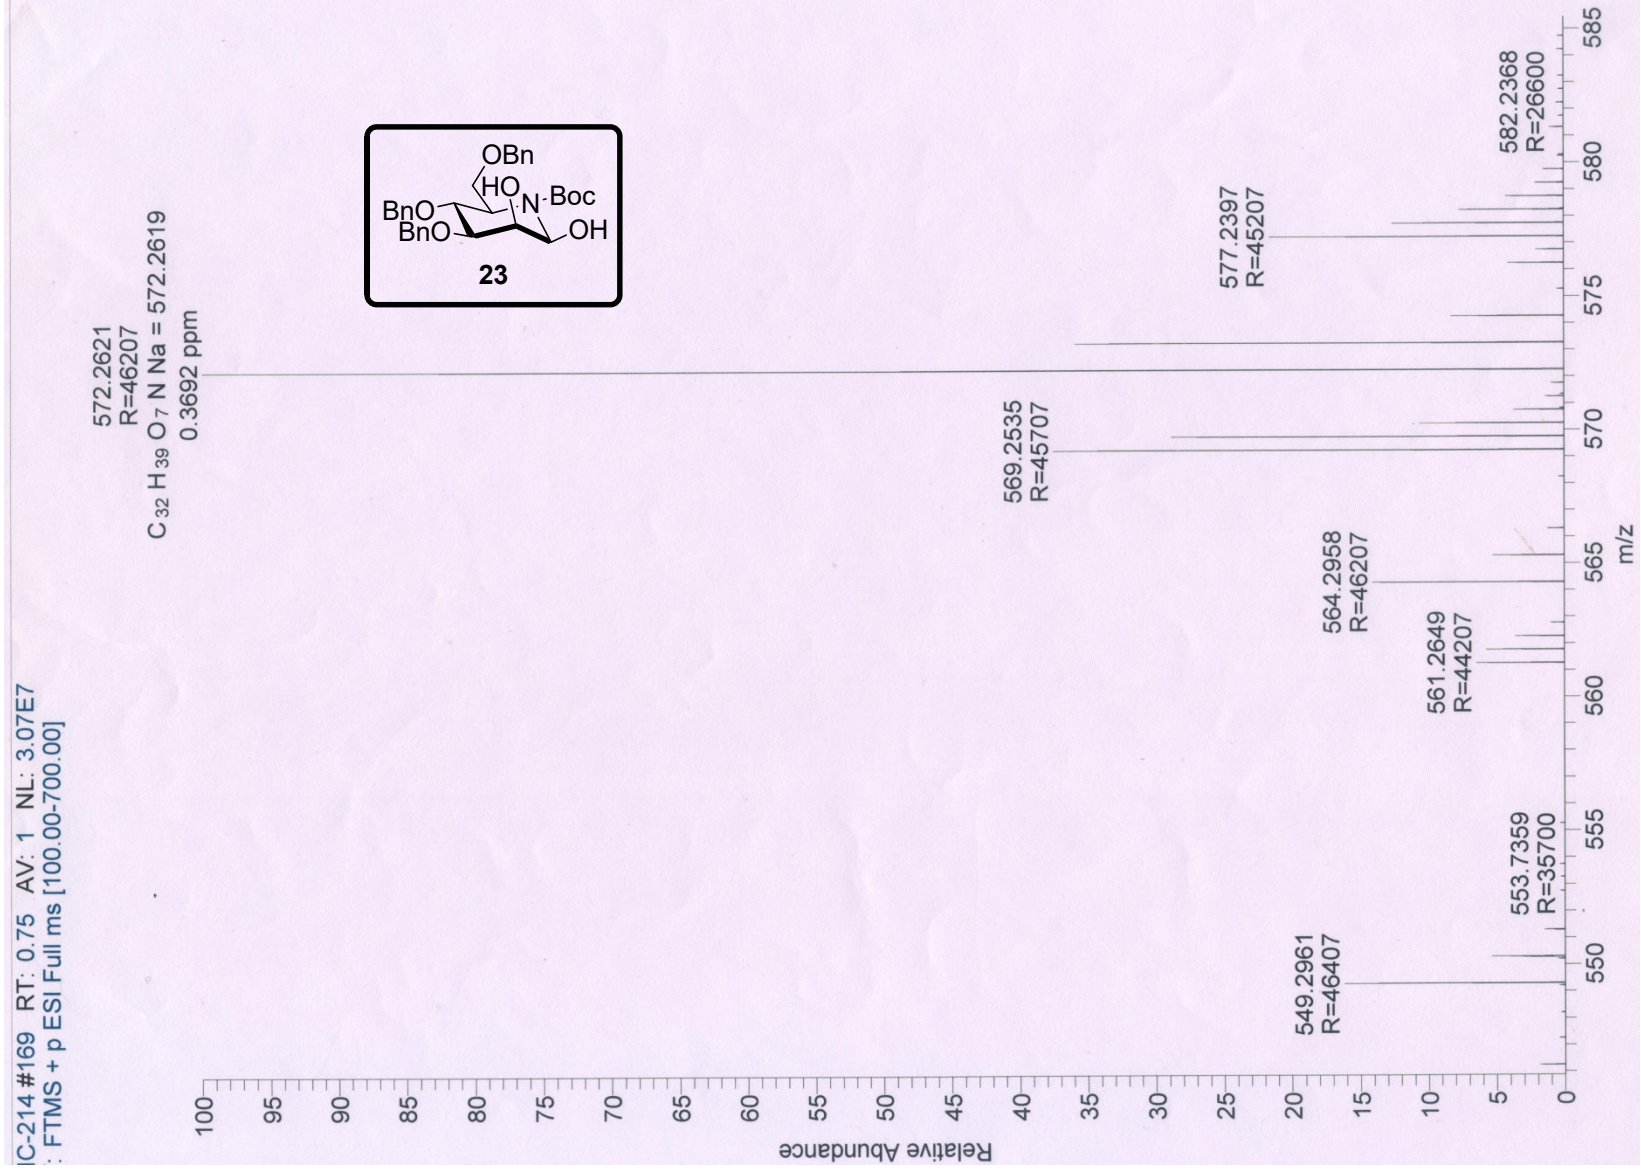

## Computational details

All the minima and transition states, reported in this study, were fully optimized at the M06-2X/6-31G\*\* level of theory<sup>1</sup> using the Gaussian 09 suite of quantum-chemical programs.<sup>2</sup> The stationary points on the potential-energy surface were characterized by evaluating the vibrational frequencies. The transition states were characterized by a single imaginary frequency. The zero-point vibrational energy corrections and thermal corrections were applied to the “bottom-of-the-well” values to obtain values for the Gibbs free energy at the room temperature. The effect of the solvent dielectric on the stability of chemical species was determined by full geometry optimizations in the dielectric continuum of toluene ( $\epsilon = 2.3741$ ) using the Conductor like Polarization Continuum Model (CPCM),<sup>3</sup> the CPCM (toluene)/M06-2X/6-31G\*\* level of theory. All the energies were calculated with respect to the infinitely separated reactants. However, to investigate the influence of noncovalent interactions on the energetics of this reaction step, the reactant complexes (corresponding to the reactants **20a** and **20b**, see manuscript for the structures) were optimized by keeping the reactive species (**20a/b** with the Super-Hydride) together in a single structure. The same strategy was employed for obtaining the optimized geometries of the final products for the above-specified reaction steps. A direct comparison of the energies of the reactant and the product complexes is expected to minimize the errors in the computation of the translational entropy in determining the relative free energy values. This approach has been applied in several previous studies.<sup>4</sup>

The complete structures of the substrates (**20a/b**) (along with protecting groups, -Bn and -Boc) had been considered, as the benzyl protecting groups are capable of making noncovalent interactions with the cation.<sup>5</sup> Also, considering the presence of the lone pairs (on carbonyl, alkoxy, and ester groups, which may have a differential binding with the cation) and phenyl groups at the substrate, which may interact with a cation and thus alter the energetics, the counter cation of Super-Hydride,  $\text{Li}^+$ , was included into the calculations. Thus, the cation- $\pi$  interactions involving  $\text{Li}^+$  cation and the benzyl protecting group of the reactants and lone pair – cation interactions involving  $\text{Li}^+$  and lone pairs on nearby oxygen atoms of the substrate had been considered to obtain the energetically favourable pathways.

Since the substrates (**20a/b**) are prochiral, the approach of Super-Hydride to both, *re* and *si*, faces of the substrates had been considered, revealing two different modes of the approach of the

Super-Hydride to the substrate. Each mode of approach is associated with two different conformations of reactant and product complexes and the transition state geometry depending upon the relative orientation of the carbamate ester group on the lactam (*N*-Boc protecting group), which coordinates with the Li<sup>+</sup> through one of its oxygen. The conformation in which the Li<sup>+</sup> cation is associated with the alkoxy oxygen of the *N*-Boc group is referred to as conformation C<sub>1</sub> (conformation 1) and the conformation in which the Li<sup>+</sup> cation is linked to the carbonyl moiety of the *N*-Boc group is referred to as conformation C<sub>2</sub> (conformation 2). Please refer to Figures S1 and S2 for the structural details of the conformations C<sub>1</sub> and C<sub>2</sub>. A weak cation – π interaction has been seen to be present in all the geometries (mostly the transition state geometries and the product complexes) belonging to conformation 2 of the *re* face approach. Therefore, two different pathways (each with two different conformations of reactant and product complexes and transition state geometries) have been investigated for both the substrates, **20a** and **20b**.

## References

1. (a) Zhao, Y.; Truhlar, D. G. Density Functional for Spectroscopy: No Long-Range Self-Interaction Error, Good Performance for Rydberg and Charge-Transfer States, and Better Performance on Average than B3LYP for Ground States. *J. Phys. Chem. A* **2006**, *110*, 13126-13130. (b) Zhao, Y.; Truhlar, D. G. A New Local Density Functional for Main-Group Thermochemistry, Transition Metal Bonding, Thermochemical Kinetics, and Noncovalent Interactions. *J. Chem. Phys.* **2006**, *125*, 194101. (c) Zhao, Y.; Truhlar, D. G. The M06 Suite of Density Functionals for Main Group Thermochemistry, Thermochemical Kinetics, Noncovalent Interactions, Excited States, and Transition Elements: Two New Functionals and Systematic Testing of Four M06-class Functionals and 12 Other Functionals. *Theor. Chem. Acc.* **2008**, *120*, 215-241.
2. Frisch, M. J.; Trucks, G. W.; Schlegel, H. B.; Scuseria, G. E.; Robb, M. A.; Cheeseman, J. R.; Scalmani, G.; Barone, V.; Mennucci, B.; Petersson, G. A.; Nakatsuji, H.; Caricato, M.; Li, X.; Hratchian, H. P.; Izmaylov, A. F.; Bloino, J.; Zheng, G.; Sonnenberg, J. L.; Hada, M.; Ehara, M.; Toyota, K.; Fukuda, R.; Hasegawa, J.; Ishida, M.; Nakajima, T.; Honda, Y.; Kitao, O.; Nakai, H.; Vreven, T.; Montgomery, J. A.; Peralta, J. E.; Ogliaro, F.; Bearpark, M.; Heyd, J. J.; Brothers, E.; Kudin, K. N.; Staroverov, V. N.; Kobayashi, R.; Normand, J.;

- Raghavachari, K.; Rendell, P. G.; Burant, J. C.; Iyengar, S. S.; Tomasi, J.; Cossi, M.; Rega, N.; Millam, J. M.; Klene, M.; Knox, J. E.; Cross, J. B.; Bakken, V.; Adamo, C.; Jaramillo, J.; Gomperts, R.; Stratmann, R. E.; Yazyev, O.; Austin, A. J.; Cammi, R.; Pomelli, C.; Ochterski, J. W.; Martin, R. L.; Morokuma, K.; Zakrzewski, V. G.; Voth, G. A.; Salvador, P.; Dannenberg, J. J.; Dapprich, S.; Daniels, A. D.; Farkas, O.; Foresman, J. B.; Ortiz, J. V.; Cioslowski, J.; Fox, D. J. *Gaussian09 Revision D.01*, Gaussian Inc., Wallingford, CT, **2009**.
3. (a) Barone, V.; Cossi, M. Quantum Calculation of Molecular Energies and Energy Gradients in Solution by a Conductor Solvent Model. *J. Phys. Chem. A* **1998**, *102*, 1995-2001. (b) Cossi, M.; Rega, N.; Scalmani, G.; Barone, V. Energies, Structures, and Electronic Properties of Molecules in Solution with the C-PCM Solvation Model. *J. Comput. Chem.* **2003**, *24*, 669-681.
4. (a) Kelly, E.; Seth, M.; Ziegler, T. Calculation of Free Energy Profiles for Elementary Bimolecular Reactions by Ab Initio Molecular Dynamics: Sampling Methods and Thermostat Considerations. *J. Phys. Chem. A* **2004**, *108*, 2167-2180. (b) Yin, H.; Wang, D.; Valiev, M. Hybrid Quantum Mechanical/Molecular Mechanics Study of the S<sub>N</sub>2 Reaction of CH<sub>3</sub>Cl + OH<sup>-</sup> in Water. *J. Phys. Chem. A* **2011**, *115*, 12047-12052. (c) Williams, V. M.; Kong, J. R.; Ko, B. J.; Mantri, Y.; Brodbelt, J. S.; Baik, M. -H.; Krische, M. J. ESI-MS, DFT, and Synthetic Studies on the H<sub>2</sub>-Mediated Coupling of Acetylene: Insertion of C-X Bonds into Rhodacyclopentadienes and Brønsted Acid Cocatalyzed Hydrogenolysis of Organorhodium Intermediates. *J. Am. Chem. Soc.* **2009**, *131*, 16054-16062. (d) van Rensburg, W. J.; Grové, C.; Steynberg, J. P.; Stark, K. B.; Huyser, J. J.; Steynberg, P. J. A DFT Study Toward the Mechanism of Chromium-Catalyzed Ethylene Trimerization. *Organometallics* **2004**, *23*, 1207-1222. (e) Qi, Y.; Dong, Q.; Zhong, L.; Liu, Z.; Qiu, P.; Cheng, R.; He, X.; Vanderbilt, J.; Liu, B. *Organometallics* **2010**, *29*, 1588-1602. (f) Bagno, A.; Kantlehner, W.; Kress, R.; Saielli, G.; Stoyanov, E. Fries Rearrangement of aryl formates: A Mechanistic Study by Means of 1H, 2H, and 11B NMR Spectroscopy and DFT Calculations. *J. Org. Chem.* **2006**, *71*, 9331-9340. (g) Li, J. -N.; Pu, M.; Ma, C. -C.; Tian, Y.; He, J.; Evans, D. G. Effect of Palladium Clusters (Pdn, n = 2-8) on Mechanisms of Acetylene Hydrogenation: A DFT Study. *J. Mol. Catal. A: Chem.* **2012**, *359*, 14-20.

5. Rodgers, M. T.; Armentrout, P. B. Cationic Noncovalent Interactions: Energetics and Periodic Trends. *Chem. Rev.* **2016**, *116*, 5642-5687.

**Table 3.** The gas-phase relative energy values in kcal/mol for the reduction of the 2-deoxygluconolactam-*N*-Boc **20a** to 2-deoxygluconolactamol-*N*-Boc **21a**.

| Molecular Description                                |         | $\Delta E$ | $\Delta(E+ZPE)$ | $\Delta H$ | $\Delta G$ |              |
|------------------------------------------------------|---------|------------|-----------------|------------|------------|--------------|
| 2-deoxygluconolactam-<br><i>N</i> -Boc<br><b>20a</b> | $R_S$   | 0.0        | 0.0             | 0.0        | 0.0        |              |
|                                                      | $C_1^r$ | $R_C$      | -39.8           | -37.4      | -37.8      | -21.2        |
|                                                      |         | $T_1$      | -26.8           | -24.8      | -26.0      | -6.1         |
|                                                      |         | $I_1$      | -35.9           | -32.6      | -33.0      | -15.7        |
|                                                      | $C_2^r$ | $R_C$      | -44.0           | -41.5      | -41.9      | <b>-25.5</b> |
|                                                      |         | $T_1$      | -29.3           | -27.4      | -28.4      | <b>-10.4</b> |
|                                                      |         | $I_1$      | -47.0           | -43.3      | -43.6      | <b>-26.7</b> |
|                                                      | $C_1^s$ | $R_C$      | -36.7           | -34.3      | -34.7      | -16.9        |
|                                                      |         | $T_1$      | -25.1           | -23.2      | -24.3      | -4.8         |
|                                                      |         | $I_1$      | -44.2           | -40.7      | -41.2      | -23.5        |
|                                                      | $C_2^s$ | $R_C$      | -43.4           | -40.7      | -41.3      | <b>-23.0</b> |
|                                                      |         | $T_1$      | -31.9           | -30.3      | -31.5      | <b>-10.5</b> |
|                                                      |         | $I_1$      | -52.4           | -48.0      | -48.8      | <b>-29.7</b> |

$R_S$ ,  $R_C$ ,  $T_1$ ,  $I_1$  represent infinitely separated reactants, the reactant complex, the transition state and product respectively for this particular step of the reaction.

*r* and *s* represent the *re* and *si* faces of the substrate on which the attack of the Super-Hydride occurs.  $C_1$  and  $C_2$  represent two different conformations of the reactant and product complexes and the transition state geometries. The conformation in which the  $Li^+$  cation is associated with the alkoxy oxygen of the *N*-Boc group is referred to as  $C_1$  and the conformation in which the  $Li^+$  cation is linked to the carbonyl moiety of the *N*-Boc group is referred to as  $C_2$ .

**Table 4.** The gas-phase relative energy values in kcal/mol for the reduction of 2-deoxygalactonolactam-*N*-Boc **20b** to 2-deoxygalactonolactamol-*N*-Boc **21b**.

| Molecular Description                                  |                             | $\Delta E$     | $\Delta(E+ZPE)$ | $\Delta H$ | $\Delta G$ |              |
|--------------------------------------------------------|-----------------------------|----------------|-----------------|------------|------------|--------------|
| 2-deoxygalactonolactam-<br><i>N</i> -Boc<br><b>20b</b> | R <sub>s</sub>              | 0.0            | 0.0             | 0.0        | 0.0        |              |
|                                                        | C <sub>1</sub> <sup>r</sup> | R <sub>c</sub> | -36.9           | -35.2      | -35.5      | -17.2        |
|                                                        |                             | T <sub>1</sub> | -18.6           | -17.1      | -17.9      | 1.1          |
|                                                        |                             | I <sub>1</sub> | -27.1           | -24.2      | -24.3      | -9.1         |
|                                                        | C <sub>2</sub> <sup>r</sup> | R <sub>c</sub> | -43.1           | -41.3      | -41.3      | <b>-25.6</b> |
|                                                        |                             | T <sub>1</sub> | -25.6           | -24.2      | -25.1      | <b>-6.0</b>  |
|                                                        |                             | I <sub>1</sub> | -37.9           | -34.7      | -34.8      | <b>-17.8</b> |
|                                                        | C <sub>1</sub> <sup>s</sup> | R <sub>c</sub> | -32.3           | -31.0      | -31.6      | -13.2        |
|                                                        |                             | T <sub>1</sub> | -19.8           | -18.7      | -19.7      | 0.7          |
|                                                        |                             | I <sub>1</sub> | -49.0           | -45.1      | -45.6      | -27.6        |
|                                                        | C <sub>2</sub> <sup>s</sup> | R <sub>c</sub> | -36.1           | -34.3      | -34.5      | <b>-17.8</b> |
|                                                        |                             | T <sub>1</sub> | -27.4           | -26.5      | -27.4      | <b>-9.3</b>  |
|                                                        |                             | I <sub>1</sub> | -49.0           | -45.1      | -45.6      | <b>-26.6</b> |

R<sub>s</sub>, R<sub>c</sub>, T<sub>1</sub>, I<sub>1</sub> represent infinitely separated reactants, the reactant complex, the transition state and product respectively for this particular step of the reaction.

r and s represent the *re* and *si* faces of the substrate on which the attack of the Super-Hydride occurs. C<sub>1</sub> and C<sub>2</sub> represent two different conformations of the reactant and product complexes and the transition state geometries. The conformation in which the Li<sup>+</sup> cation is associated with



the alkoxy oxygen of the *N*-Boc group is referred to as C<sub>1</sub> and the conformation in which the Li<sup>+</sup> cation is linked to the carbonyl moiety of the *N*-Boc group is referred to as C<sub>2</sub>.

**Table 5.** The solvent-phase relative energy values in kcal/mol for the reduction of 2-deoxyglycolactam-*N*-Boc **20a/b** to 2-deoxyglycolactamol-*N*-Boc **21a/b**.

| Molecular Description                                |                                                        | $\Delta E$                  | $\Delta(E+ZPE)$ | $\Delta H$ | $\Delta G$ |       |
|------------------------------------------------------|--------------------------------------------------------|-----------------------------|-----------------|------------|------------|-------|
| 2-deoxygluconolactam-<br><i>N</i> -Boc<br><b>20a</b> | R <sub>S</sub>                                         | 0.0                         | 0.0             | 0.0        | 0.0        |       |
|                                                      | C <sub>2</sub> <sup>f</sup>                            | R <sub>C</sub>              | -34.5           | -31.8      | -32.2      | -15.3 |
|                                                      |                                                        | T <sub>1</sub>              | -23.9           | -22.3      | -23.4      | -2.5  |
|                                                      |                                                        | I <sub>1</sub>              | -38.6           | -34.8      | -35.3      | -17.2 |
|                                                      | C <sub>2</sub> <sup>s</sup>                            | R <sub>C</sub>              | -33.8           | -31.9      | -32.3      | -15.0 |
|                                                      |                                                        | T <sub>1</sub>              | -21.4           | -19.7      | -21.0      | 0.3   |
|                                                      |                                                        | I <sub>1</sub>              | -41.7           | -38.0      | -38.5      | -20.9 |
|                                                      | 2-deoxygalactonolactam-<br><i>N</i> -Boc<br><b>20b</b> | R <sub>S</sub>              | 0.0             | 0.0        | 0.0        | 0.0   |
|                                                      |                                                        | C <sub>2</sub> <sup>f</sup> | R <sub>C</sub>  | -33.2      | -31.6      | -31.6 |
| T <sub>1</sub>                                       |                                                        |                             | -16.4           | -15.5      | -16.2      | 0.1   |
| I <sub>1</sub>                                       |                                                        |                             | -32.1           | -29.2      | -29.3      | -13.7 |
| C <sub>2</sub> <sup>s</sup>                          |                                                        | R <sub>C</sub>              | -27.7           | -26.6      | -26.6      | -12.7 |
|                                                      |                                                        | T <sub>1</sub>              | -16.0           | -15.2      | -16.0      | 1.6   |
|                                                      |                                                        | I <sub>1</sub>              | -37.8           | -33.9      | -34.5      | -16.3 |

$R_s$ ,  $R_c$ ,  $T_1$ ,  $I_1$  represent infinitely separated reactants, the reactant complex, the transition state and product respectively for this particular step of the reaction.

$r$  and  $s$  represent the *re* and *si* faces of the substrate on which the attack of the Super-Hydride occurs.  $C_2$  represents the most favourable gas-phase pathway in the given mode of attack of Super-Hydride to the prochiral substrate.

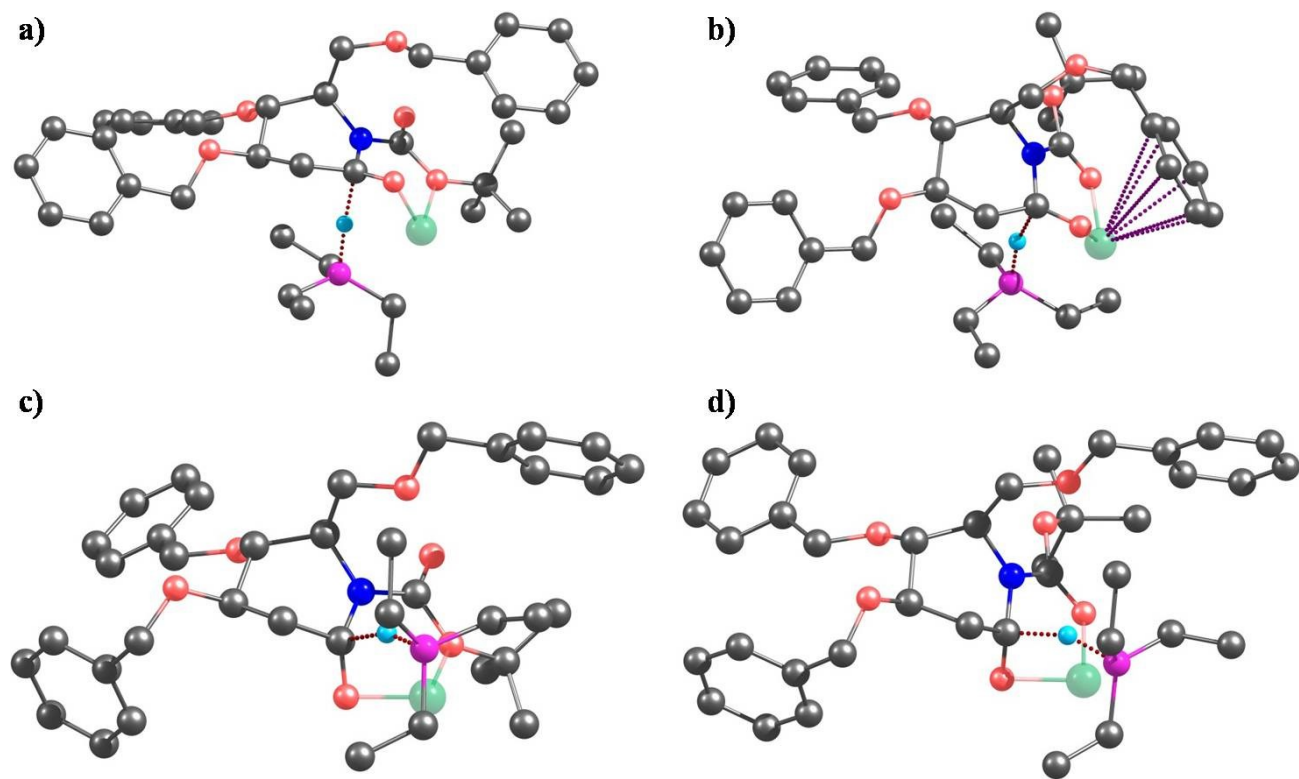

**Figure S1.** The optimized gas-phase transition state geometries at the M06-2X/6-31G\*\* level of theory depicting different modes of approaches of the Super-Hydride to the different faces of 2-deoxygluconolactam-*N*-Boc **20a**. a) and b) represent conformations 1 and 2, respectively, for the *re* face attack whereas c) and d) represent conformations 1 and 2, respectively, for the *si* face attack of the Super-Hydride to the 2-deoxygluconolactam-*N*-Boc **20a**. The two conformations for each face of the attack were obtained with respect to the relative orientation of the *N*-Boc group that is linked to the Li<sup>+</sup> through one of its oxygen through a covalent linkage. Hydrogen atoms that are not part of the reaction coordinate have been removed for clarity. Color codes: black - carbon, coral - oxygen, cyan - hydrogen, light green - lithium, fuchsia - boron, blue - nitrogen. The dotted pink lines represented cation- $\pi$  interaction and dotted maroon lines represented bond breaking/bond forming.

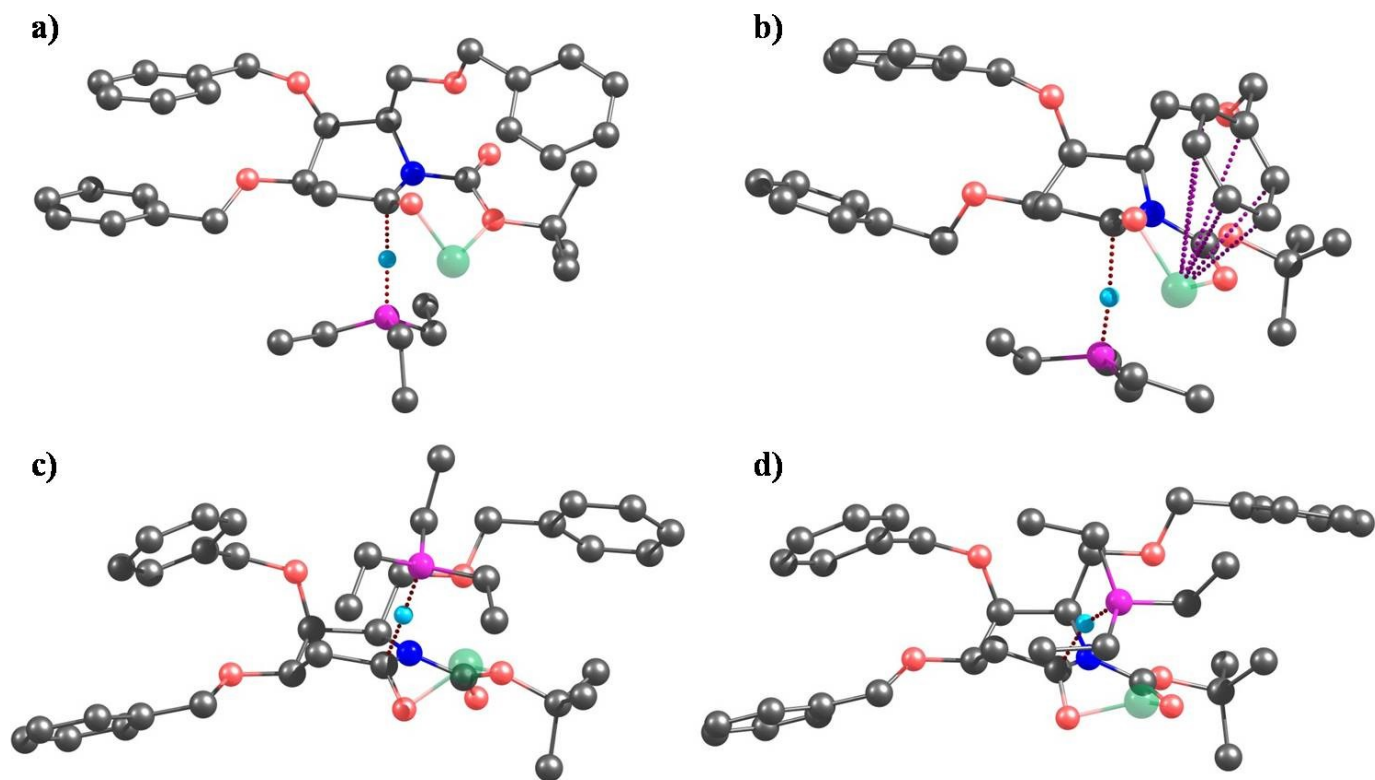

**Figure S2.** The optimized gas-phase transition state geometries at the M06-2X/6-31G\*\* level of theory depicting different modes of approaches of the Super-Hydride to the different faces of 2-deoxygalactonolactam-*N*-Boc **20b**. a) and b) represent conformations 1 and 2, respectively, for the *re* face attack whereas c) and d) represent conformations 1 and 2, respectively, for the *si* face attack of the Super-Hydride to 2-deoxygalactonolactam-*N*-Boc **20b**. The two conformations for each face of the attack were obtained with respect to the relative orientation of the *N*-Boc group that is linked to the Li<sup>+</sup> through one of its oxygen through a covalent linkage. Hydrogen atoms that are not part of the reaction coordinate have been removed for clarity. Color codes: black - carbon, coral - oxygen, cyan - hydrogen, light green - lithium, fuchsia - boron, blue - nitrogen. The dotted pink lines represented cation- $\pi$  interaction and dotted maroon lines represent bond breaking/bond forming.

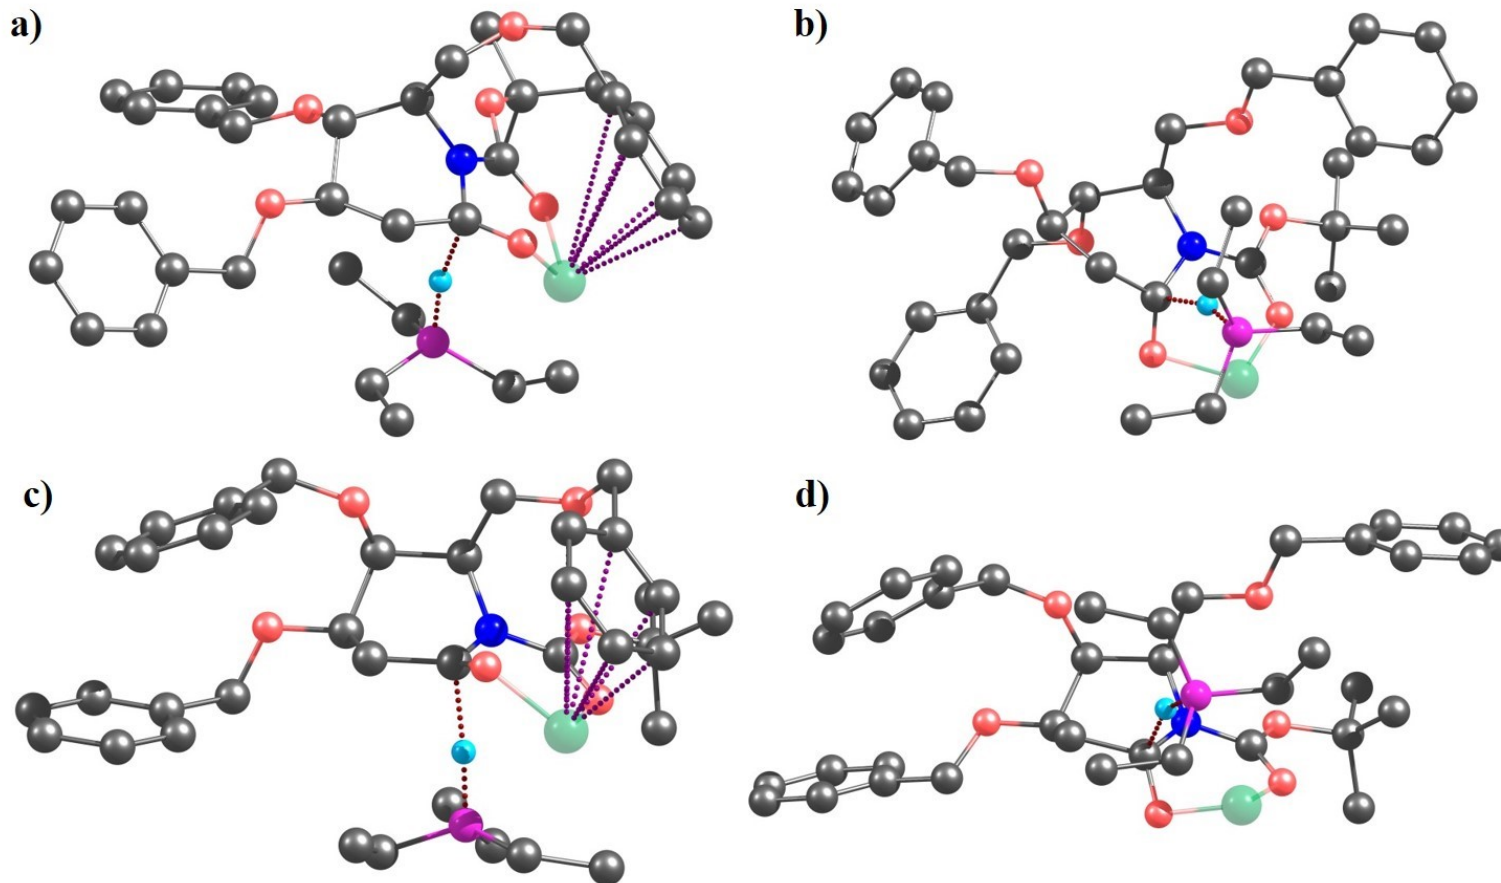

**Figure S3.** The solvent-phase optimized transition state geometries at the CPCM (toluene)/M06-2X/6-31G\*\* level of theory depicting different modes of approaches of Super-Hydride to the 2-deoxyglycolactam-*N*-Boc **20a/b** : a) *re* face attack to the **20a**, (b) *si* face attack to the **20a**, c) *re* face attack to the 2-deoxygalactonolactam-*N*-Boc **20b** and d) *si* face attack to the 2-deoxygalactonolactam-**20b**. Only the lowest energy conformations (conformation 2) from the gas phase optimized geometries for each mode of approach have been considered for the solvent-phase calculations. Hydrogen atoms that are not part of the reaction coordinate have been removed for clarity. Color codes: black - carbon, coral - oxygen, cyan - hydrogen, light green - lithium, fuchsia - boron, blue - nitrogen. The dotted pink lines represented cation- $\pi$  interaction and dotted maroon lines represent bond breaking/bond forming.

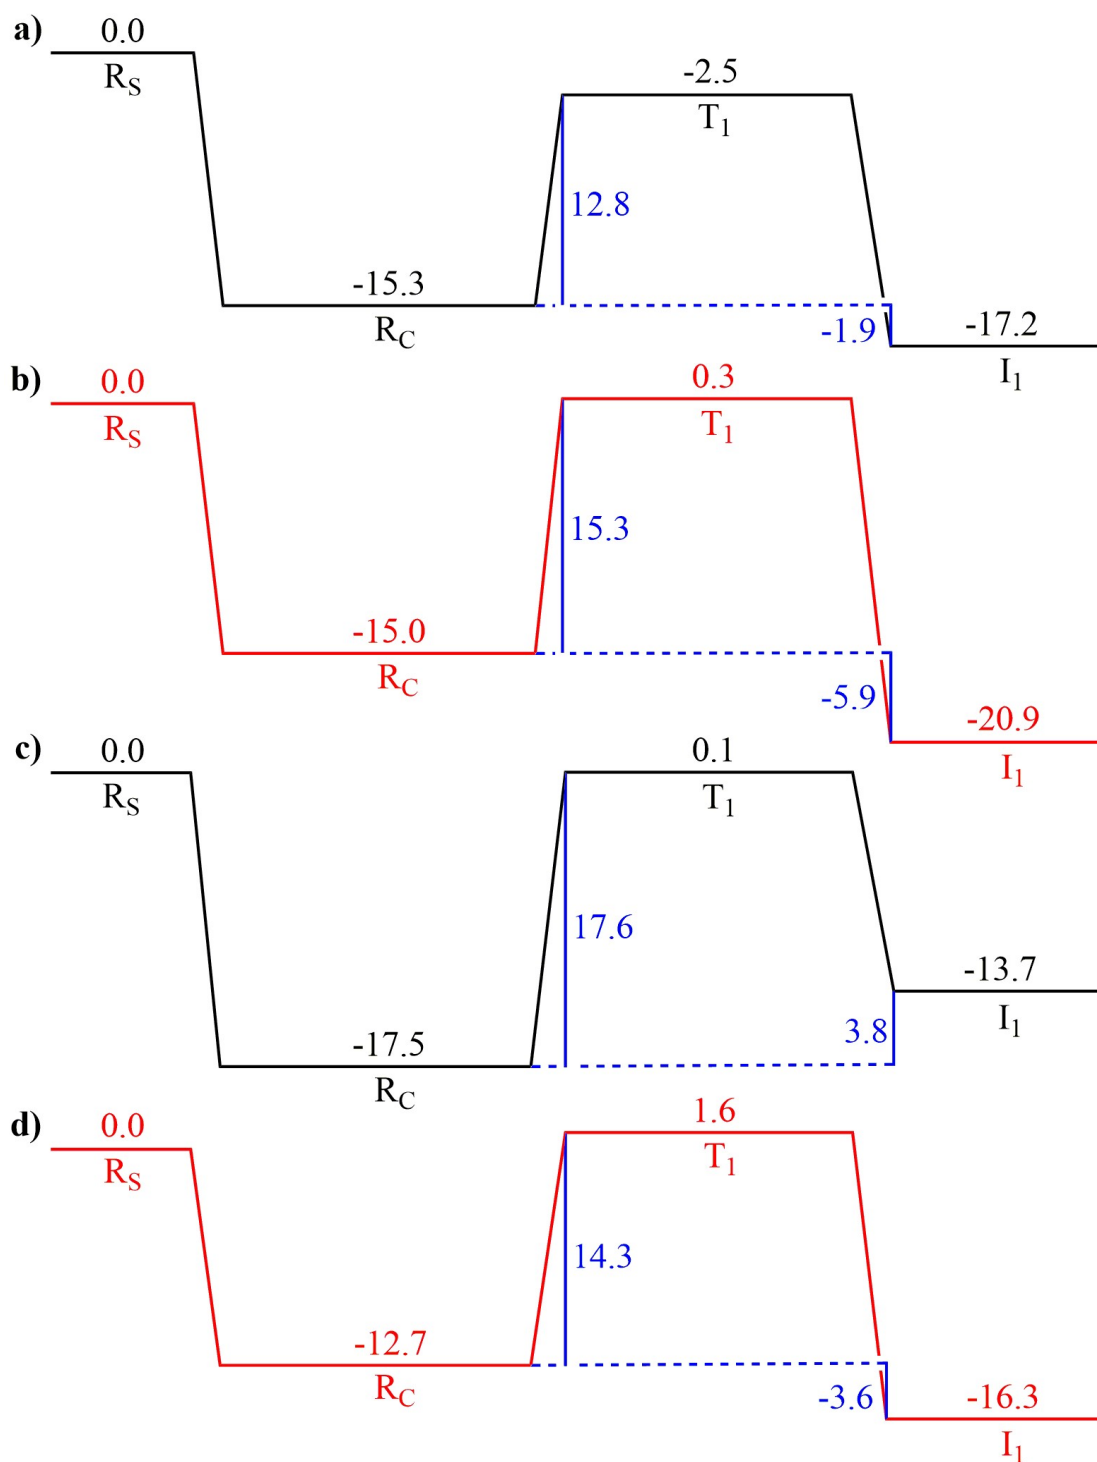

**Figure S4.** The solvent-phase free energy profile for reduction of the 2-deoxyglycolactam-*N*-Boc **20a/b** to 2-deoxyglycolactamol-*N*-Boc **21a/b** representing approach of the Super-Hydride to a) *re* face of **20a**, b) *si* face of **20a**, c) *re* face of **20b**, and d) *si* face of **20b**. R<sub>s</sub>, R<sub>c</sub>, T<sub>1</sub>, I<sub>1</sub> represent infinitely separated reactants, the reactant complex, the transition state geometry and the product complex, respectively. All the values are in kcal/mol.

**XYZ coordinates of the DFT optimized geometries**

**2-deoxygluconolactam-*N*-Boc (20a)**

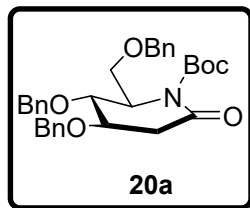

| glu_re_reactant_gas_conformation1 |           |           |           |    |           |           |           |
|-----------------------------------|-----------|-----------|-----------|----|-----------|-----------|-----------|
| C                                 | 4.915787  | 1.985394  | -2.236586 | O  | -2.994409 | 0.732843  | 0.566916  |
| C                                 | 3.534886  | 1.847602  | -2.083778 | C  | -4.099265 | 1.725384  | 0.596694  |
| C                                 | 2.698710  | 2.911511  | -2.414199 | C  | -3.496436 | 3.122009  | 0.616950  |
| C                                 | 3.243150  | 4.101881  | -2.892129 | C  | -5.050882 | 1.494349  | -0.570674 |
| C                                 | 4.619302  | 4.236643  | -3.043575 | C  | -4.794527 | 1.387995  | 1.910233  |
| C                                 | 5.457384  | 3.173278  | -2.713193 | Li | -1.899196 | 0.523105  | 2.254034  |
| C                                 | 2.995259  | 0.552291  | -1.533017 | C  | -1.135141 | 1.783815  | 3.773693  |
| O                                 | 1.591554  | 0.509336  | -1.693706 | C  | -0.665834 | 2.596519  | 4.984094  |
| C                                 | 1.009063  | -0.743190 | -1.435682 | B  | 0.012997  | 1.774051  | 2.559183  |
| C                                 | 1.292089  | -1.241461 | -0.017206 | C  | 0.236728  | 3.262840  | 1.925351  |
| C                                 | 0.139048  | -2.135753 | 0.455157  | C  | 0.799554  | 3.210003  | 0.501210  |
| C                                 | -1.082468 | -1.263535 | 0.594962  | C  | 1.416098  | 1.109052  | 3.074621  |
| N                                 | -1.293208 | -0.418567 | -0.475193 | C  | 1.286509  | -0.292511 | 3.676164  |
| C                                 | -0.493622 | -0.589378 | -1.709216 | H  | 1.423594  | -1.501472 | -2.126329 |
| O                                 | 2.512877  | -1.938861 | -0.032296 | H  | 1.348714  | -0.358303 | 0.641805  |
| C                                 | 3.201170  | -1.923477 | 1.203560  | H  | 0.333011  | -2.573188 | 1.434828  |
| C                                 | 4.620826  | -2.391074 | 1.006019  | H  | -0.614047 | 0.344276  | -2.253908 |
| C                                 | 5.410286  | -2.644787 | 2.129267  | H  | -0.750109 | -1.570830 | -3.603672 |
| C                                 | 6.736680  | -3.033545 | 1.985381  | H  | -0.719412 | -2.707711 | -2.254657 |
| C                                 | 7.287198  | -3.178400 | 0.713099  | H  | -3.106314 | -3.626120 | -2.284775 |
| C                                 | 6.502162  | -2.932814 | -0.408134 | H  | -2.483606 | -2.855371 | -0.819022 |
| C                                 | 5.173039  | -2.538781 | -0.264479 | H  | -4.130868 | -2.557192 | 0.778971  |
| C                                 | -1.085266 | -1.721379 | -2.571814 | H  | -6.462975 | -2.012744 | 1.419183  |
| O                                 | -2.491594 | -1.673678 | -2.536122 | H  | -8.110742 | -1.370584 | -0.322831 |
| C                                 | -3.079456 | -2.678046 | -1.725415 | H  | -7.415015 | -1.268789 | -2.702095 |
| C                                 | -4.470232 | -2.264226 | -1.325599 | H  | -5.085588 | -1.845323 | -3.339905 |
| C                                 | -5.396972 | -1.885934 | -2.300271 | H  | 3.263262  | 0.465816  | -0.467958 |
| C                                 | -6.700197 | -1.561067 | -1.939462 | H  | 3.459960  | -0.303338 | -2.047868 |
| C                                 | -7.090704 | -1.615364 | -0.601269 | H  | 5.568451  | 1.154427  | -1.976633 |
| C                                 | -6.167035 | -1.975342 | 0.375115  | H  | 6.532433  | 3.269448  | -2.828986 |
| C                                 | -4.856399 | -2.288905 | 0.014439  | H  | 5.038826  | 5.165459  | -3.416762 |
| C                                 | -2.258621 | 0.619290  | -0.546861 | H  | 2.585803  | 4.928006  | -3.144770 |
| O                                 | -2.364126 | 1.316154  | -1.518621 | H  | 1.626984  | 2.803299  | -2.289063 |
| O                                 | -1.751567 | -1.272312 | 1.624854  | H  | 3.200005  | -0.900393 | 1.613100  |
|                                   |           |           |           | H  | 2.692877  | -2.562107 | 1.942327  |
|                                   |           |           |           | H  | 4.981022  | -2.531732 | 3.122359  |

|   |           |           |           |   |           |           |           |
|---|-----------|-----------|-----------|---|-----------|-----------|-----------|
| H | 7.340949  | -3.227759 | 2.865844  | C | -0.952784 | 1.702955  | -2.205953 |
| H | 8.322003  | -3.484717 | 0.599052  | O | -2.357390 | 1.736099  | -2.174296 |
| H | 6.923798  | -3.049128 | -1.401743 | C | -2.966043 | 0.661859  | -2.875547 |
| H | 4.553128  | -2.354062 | -1.134872 | C | -4.405001 | 0.542946  | -2.455059 |
| H | -5.983242 | 2.027301  | -0.362620 | C | -5.226567 | 1.672235  | -2.414296 |
| H | -4.638737 | 1.856571  | -1.510585 | C | -6.565538 | 1.552812  | -2.056915 |
| H | -5.279031 | 0.429530  | -0.662605 | C | -7.098132 | 0.302745  | -1.742946 |
| H | -4.297269 | 3.853701  | 0.756599  | C | -6.282506 | -0.824762 | -1.778451 |
| H | -2.784337 | 3.225262  | 1.441494  | C | -4.936546 | -0.703427 | -2.123808 |
| H | -2.981762 | 3.338048  | -0.319977 | O | 1.693790  | 1.870017  | 0.182795  |
| H | -5.634923 | 2.069456  | 2.061197  | C | 3.099359  | 1.798149  | 0.274402  |
| H | -5.172532 | 0.362062  | 1.883438  | C | 3.584435  | 2.715811  | 1.367753  |
| H | -4.121696 | 1.507393  | 2.767180  | C | 2.711907  | 3.259808  | 2.308289  |
| H | -0.016283 | -2.949540 | -0.261327 | C | 3.203891  | 4.076110  | 3.324778  |
| H | -0.380536 | 1.063554  | 1.594690  | C | 4.564593  | 4.352189  | 3.410706  |
| H | 1.887799  | 1.766848  | 3.819910  | C | 5.439018  | 3.807879  | 2.471914  |
| H | 2.137522  | 1.082833  | 2.240430  | C | 4.949331  | 2.995486  | 1.456194  |
| H | 2.246334  | -0.749368 | 3.951889  | O | -1.899268 | -1.827375 | -0.987157 |
| H | 0.671224  | -0.275719 | 4.583950  | C | -2.144991 | 0.652735  | 0.677638  |
| H | 0.785520  | -0.980093 | 2.978325  | O | -2.940848 | -0.381150 | 1.062185  |
| H | -0.693898 | 3.854271  | 1.911599  | C | -4.150255 | -0.109701 | 1.869542  |
| H | 0.928416  | 3.841917  | 2.555951  | C | -4.990643 | 1.000839  | 1.248129  |
| H | 1.047663  | 4.194877  | 0.086984  | O | -2.278408 | 1.778175  | 1.087569  |
| H | 1.714939  | 2.605352  | 0.459587  | C | -4.912284 | -1.428744 | 1.775650  |
| H | 0.084706  | 2.732741  | -0.183827 | C | -3.728793 | 0.196290  | 3.298553  |
| H | -2.085268 | 2.245135  | 3.431796  | B | -0.182686 | -2.393895 | 1.865868  |
| H | -1.409521 | 0.777912  | 4.163323  | C | 1.101938  | -3.267380 | 1.405670  |
| H | -1.425884 | 2.683106  | 5.767720  | C | 0.796060  | -4.417909 | 0.436683  |
| H | 0.221675  | 2.137208  | 5.430226  | C | 0.041661  | -1.261203 | 2.999992  |
| H | -0.385074 | 3.606994  | 4.672468  | C | 1.200302  | -0.278745 | 2.805310  |

glu\_re\_TS\_gas\_conformation1

|   |           |           |           |   |           |           |           |
|---|-----------|-----------|-----------|---|-----------|-----------|-----------|
| C | 5.624898  | -2.703182 | -1.849632 | C | -1.481333 | -3.350657 | 2.225934  |
| C | 4.837582  | -1.552633 | -1.789444 | C | -1.143111 | -4.335985 | 3.354943  |
| C | 5.315655  | -0.368590 | -2.349203 | H | 1.513659  | 1.500574  | -1.836335 |
| C | 6.566741  | -0.337182 | -2.959141 | H | 1.649001  | -0.614547 | 0.254880  |
| C | 7.352004  | -1.485285 | -3.010617 | H | 0.671251  | -2.295772 | -1.322551 |
| C | 6.877502  | -2.670179 | -2.453013 | H | -0.546440 | 2.222393  | -0.163823 |
| C | 3.507951  | -1.593323 | -1.079678 | H | -0.572748 | 2.690709  | -2.494326 |
| O | 2.698705  | -0.529127 | -1.531358 | H | -0.594802 | 0.986371  | -2.958944 |
| C | 1.496449  | -0.359849 | -0.802834 | H | -2.901599 | 0.853583  | -3.958713 |
| C | 1.127448  | 1.123409  | -0.871661 | H | -2.453591 | -0.284228 | -2.665318 |
| C | -0.385128 | 1.364071  | -0.814698 | H | -4.286004 | -1.574599 | -2.133820 |
| N | -1.146568 | 0.261833  | -0.201205 | H | -6.692547 | -1.800584 | -1.534024 |
| C | -0.931668 | -1.088585 | -0.647280 | H | -8.144544 | 0.210303  | -1.469828 |
| C | 0.393900  | -1.241641 | -1.366106 | H | -7.196599 | 2.435348  | -2.024496 |
|   |           |           |           | H | -4.801955 | 2.643413  | -2.650355 |
|   |           |           |           | H | 3.422712  | 0.769291  | 0.497685  |



|                                  |           |           |           |    |           |           |           |
|----------------------------------|-----------|-----------|-----------|----|-----------|-----------|-----------|
| H                                | 3.555815  | 2.073218  | -0.690057 | C  | 1.995970  | 5.771150  | -1.685736 |
| H                                | 5.632152  | 2.572323  | 0.722448  | C  | 3.222491  | 5.177550  | -1.395646 |
| H                                | 6.502013  | 4.019991  | 2.529397  | C  | 2.410779  | 1.489016  | -1.776741 |
| H                                | 4.943648  | 4.989835  | 4.202934  | O  | 1.131802  | 0.904132  | -1.761726 |
| H                                | 2.517245  | 4.497540  | 4.052359  | C  | 1.131260  | -0.506839 | -1.655118 |
| H                                | 1.651791  | 3.043035  | 2.235723  | C  | 1.598134  | -0.936224 | -0.250441 |
| H                                | 3.665968  | -1.497733 | 0.008669  | C  | 0.554965  | -1.738538 | 0.513375  |
| H                                | 3.019051  | -2.566029 | -1.245507 | C  | -0.803502 | -1.030199 | 0.594537  |
| H                                | 5.252283  | -3.631427 | -1.422899 | N  | -1.185385 | -0.642270 | -0.851246 |
| H                                | 7.480521  | -3.571709 | -2.493782 | C  | -0.299778 | -0.932261 | -1.977167 |
| H                                | 8.326875  | -1.458707 | -3.486824 | O  | 2.829286  | -1.621801 | -0.406002 |
| H                                | 6.928726  | 0.587889  | -3.397102 | C  | 3.544452  | -1.788596 | 0.796789  |
| H                                | 4.691988  | 0.518266  | -2.317440 | C  | 4.983614  | -2.125723 | 0.494831  |
| H                                | -5.986185 | 0.966995  | 1.700809  | C  | 5.752143  | -2.798459 | 1.444966  |
| H                                | -4.555167 | 1.983307  | 1.415567  | C  | 7.096836  | -3.064378 | 1.207084  |
| H                                | -5.100602 | 0.834018  | 0.174013  | C  | 7.683987  | -2.667176 | 0.008439  |
| H                                | -4.622382 | 0.361881  | 3.907669  | C  | 6.918601  | -2.003509 | -0.946374 |
| H                                | -3.167617 | -0.640059 | 3.726425  | C  | 5.574959  | -1.730972 | -0.704498 |
| H                                | -3.111618 | 1.095513  | 3.327988  | C  | -0.392647 | -2.381177 | -2.487855 |
| H                                | -5.849328 | -1.352314 | 2.332119  | O  | -1.734063 | -2.798312 | -2.619653 |
| H                                | -5.154462 | -1.646981 | 0.729814  | C  | -2.253968 | -3.478085 | -1.498960 |
| H                                | -4.347087 | -2.258751 | 2.214279  | C  | -3.615941 | -2.955844 | -1.114804 |
| H                                | 0.218811  | -1.000930 | -2.422889 | C  | -4.263562 | -1.960172 | -1.844940 |
| H                                | -0.485085 | -1.677704 | 0.739654  | C  | -5.488876 | -1.452064 | -1.405259 |
| H                                | 1.578843  | -3.682181 | 2.307872  | C  | -6.065202 | -1.915324 | -0.225337 |
| H                                | 1.875304  | -2.623275 | 0.967170  | C  | -5.422610 | -2.919473 | 0.508249  |
| H                                | 1.700618  | -4.879536 | 0.024725  | C  | -4.212240 | -3.443029 | 0.057376  |
| H                                | 0.229540  | -5.215056 | 0.930509  | C  | -2.121411 | 0.313644  | -1.079455 |
| H                                | 0.178800  | -4.087670 | -0.408520 | O  | -2.274654 | 0.972681  | -2.088226 |
| H                                | -0.884315 | -0.682347 | 3.145359  | O  | -1.729682 | -1.768086 | 1.216277  |
| H                                | 0.194965  | -1.790006 | 3.954504  | O  | -2.978453 | 0.426609  | -0.001789 |
| H                                | 1.389129  | 0.327708  | 3.697634  | C  | -3.609155 | 1.710469  | 0.292074  |
| H                                | 2.136062  | -0.803922 | 2.572213  | C  | -2.500040 | 2.733860  | 0.499408  |
| H                                | 0.999319  | 0.420505  | 1.986656  | C  | -4.594518 | 2.126794  | -0.794488 |
| H                                | -2.335628 | -2.752085 | 2.595486  | C  | -4.357437 | 1.419572  | 1.588704  |
| H                                | -1.842505 | -3.964658 | 1.375068  | Li | -3.365893 | -1.316911 | 0.770518  |
| H                                | -1.996505 | -4.963916 | 3.629078  | C  | -1.367099 | 1.138611  | 3.979984  |
| H                                | -0.321866 | -4.996082 | 3.063897  | C  | -2.253103 | 2.356455  | 4.247676  |
| H                                | -0.824396 | -3.795452 | 4.250092  | B  | 0.079213  | 1.367978  | 3.394980  |
| Li                               | -2.427851 | -2.194966 | 0.700712  | C  | 0.519635  | 2.746748  | 2.751418  |
| glu_re_product_gas_conformation1 |           |           |           | C  | 1.358365  | 2.656956  | 1.467115  |
| C                                | 3.349769  | 3.792802  | -1.429864 | C  | 1.130132  | 0.186198  | 3.459230  |
| C                                | 2.257471  | 2.989865  | -1.759587 | C  | 0.649449  | -1.151275 | 4.028463  |
| C                                | 1.031960  | 3.585724  | -2.057423 | H  | 1.825271  | -0.944736 | -2.392108 |
| C                                | 0.904680  | 4.972016  | -2.015568 | H  | 1.776143  | -0.003509 | 0.311699  |
|                                  |           |           |           | H  | 0.874365  | -1.895366 | 1.546447  |

|   |           |           |           |
|---|-----------|-----------|-----------|
| H | -0.637459 | -0.290256 | -2.792402 |
| H | 0.051582  | -2.407422 | -3.488846 |
| H | 0.174517  | -3.085452 | -1.868213 |
| H | -2.324173 | -4.553086 | -1.723921 |
| H | -1.616725 | -3.348980 | -0.614525 |
| H | -3.697092 | -4.203047 | 0.639193  |
| H | -5.865213 | -3.294777 | 1.425703  |
| H | -7.010082 | -1.508743 | 0.120976  |
| H | -5.985709 | -0.681236 | -1.985680 |
| H | -3.786074 | -1.571057 | -2.738203 |
| H | 3.007874  | 1.172186  | -0.906105 |
| H | 2.959687  | 1.162163  | -2.676470 |
| H | 4.303008  | 3.329002  | -1.186072 |
| H | 4.077674  | 5.792287  | -1.132884 |
| H | 1.891817  | 6.850996  | -1.651812 |
| H | -0.054037 | 5.429658  | -2.240207 |
| H | 0.183096  | 2.954802  | -2.301735 |
| H | 3.501497  | -0.852397 | 1.382004  |
| H | 3.098484  | -2.576841 | 1.421435  |
| H | 5.292917  | -3.118159 | 2.377521  |
| H | 7.683671  | -3.589233 | 1.954347  |
| H | 8.731268  | -2.878753 | -0.182195 |
| H | 7.369306  | -1.696435 | -1.885191 |
| H | 4.968248  | -1.221222 | -1.445415 |
| H | -5.148697 | 3.004528  | -0.447395 |
| H | -4.085523 | 2.361376  | -1.726859 |
| H | -5.309916 | 1.319242  | -0.972312 |
| H | -2.918881 | 3.677020  | 0.862494  |
| H | -1.787282 | 2.358004  | 1.240793  |
| H | -1.968612 | 2.923811  | -0.436394 |
| H | -4.828322 | 2.329433  | 1.969766  |
| H | -5.148166 | 0.680295  | 1.407660  |
| H | -3.672815 | 1.040407  | 2.352597  |
| H | 0.425599  | -2.734739 | 0.081683  |
| H | -0.634235 | -0.038551 | 1.081586  |
| H | 2.002071  | 0.556576  | 4.023102  |
| H | 1.527007  | 0.040324  | 2.444500  |
| H | 1.423635  | -1.923893 | 3.963640  |
| H | 0.373769  | -1.058730 | 5.083773  |
| H | -0.231463 | -1.513408 | 3.485404  |
| H | -0.330221 | 3.420449  | 2.592756  |
| H | 1.122349  | 3.239350  | 3.534366  |
| H | 1.637078  | 3.644693  | 1.086936  |
| H | 2.285327  | 2.095635  | 1.635033  |
| H | 0.811356  | 2.150623  | 0.660441  |
| H | -1.823910 | 0.465476  | 3.225207  |

|   |           |          |          |
|---|-----------|----------|----------|
| H | -1.315984 | 0.504204 | 4.874004 |
| H | -3.240848 | 2.072677 | 4.625582 |
| H | -1.794767 | 3.014412 | 4.992839 |
| H | -2.408370 | 2.956681 | 3.345903 |

glu\_re\_reactant\_gas\_conformation2

|    |           |           |           |
|----|-----------|-----------|-----------|
| C  | 2.027544  | 3.594561  | -1.629938 |
| C  | 2.910008  | 2.620456  | -1.169599 |
| C  | 4.207449  | 2.989619  | -0.808671 |
| C  | 4.619006  | 4.312849  | -0.911702 |
| C  | 3.733419  | 5.285222  | -1.372540 |
| C  | 2.439008  | 4.921860  | -1.728516 |
| C  | 2.508640  | 1.171238  | -1.051491 |
| O  | 1.126695  | 1.040406  | -1.316895 |
| C  | 0.659477  | -0.278849 | -1.466193 |
| C  | 1.030356  | -1.177802 | -0.283947 |
| C  | -0.065751 | -2.231945 | -0.077349 |
| C  | -1.284836 | -1.477614 | 0.388216  |
| N  | -1.599222 | -0.366959 | -0.397015 |
| C  | -0.859832 | -0.152499 | -1.662647 |
| O  | 2.278287  | -1.762412 | -0.563035 |
| C  | 3.033651  | -2.090506 | 0.586825  |
| C  | 4.438926  | -2.461057 | 0.183881  |
| C  | 4.895268  | -2.284933 | -1.120155 |
| C  | 6.208954  | -2.611467 | -1.452377 |
| C  | 7.074094  | -3.111842 | -0.485434 |
| C  | 6.620521  | -3.288527 | 0.820609  |
| C  | 5.309596  | -2.966892 | 1.151703  |
| C  | -1.430845 | -1.022194 | -2.781181 |
| O  | -2.793427 | -0.705789 | -2.945308 |
| C  | -3.638219 | -1.840186 | -3.079501 |
| C  | -3.823479 | -2.562263 | -1.766572 |
| C  | -3.231494 | -3.802093 | -1.525721 |
| C  | -3.386631 | -4.434809 | -0.291870 |
| C  | -4.137166 | -3.828292 | 0.708889  |
| C  | -4.722511 | -2.582656 | 0.481107  |
| C  | -4.562493 | -1.954240 | -0.747196 |
| C  | -2.564031 | 0.560762  | 0.020009  |
| O  | -3.149069 | 0.497528  | 1.089597  |
| Li | -2.051503 | -0.167596 | 2.536745  |
| O  | -1.834683 | -1.752574 | 1.442387  |
| O  | -2.743278 | 1.506119  | -0.875965 |
| C  | -3.526440 | 2.711704  | -0.564089 |
| C  | -3.328008 | 3.548893  | -1.820755 |
| C  | -4.991296 | 2.333544  | -0.385485 |
| C  | -2.934079 | 3.409960  | 0.654522  |

|   |           |           |           |                             |           |           |           |
|---|-----------|-----------|-----------|-----------------------------|-----------|-----------|-----------|
| C | 0.059837  | 2.589932  | 2.901424  | H                           | -1.422916 | -0.473692 | 4.403651  |
| C | 0.923256  | 2.965121  | 1.692380  | H                           | -0.595323 | 0.772674  | 5.247787  |
| B | -0.110642 | 0.977925  | 3.080245  | H                           | -3.097295 | 1.144479  | 5.263674  |
| C | 1.319917  | 0.217000  | 3.313526  | H                           | -2.210923 | 2.495503  | 4.541024  |
| C | 1.226038  | -1.298690 | 3.511321  | H                           | -3.090094 | 1.392938  | 3.517874  |
| C | -1.165731 | 0.605689  | 4.325323  | H                           | -3.900112 | 4.476388  | -1.740581 |
| C | -2.459901 | 1.437997  | 4.422520  | H                           | -2.271427 | 3.799965  | -1.946803 |
| H | 1.106402  | -0.740835 | -2.365192 | H                           | -3.666747 | 2.997504  | -2.701590 |
| H | 1.082289  | -0.547660 | 0.619848  | H                           | -3.378674 | 4.405460  | 0.740590  |
| H | 0.190292  | -2.937375 | 0.713607  | H                           | -3.129101 | 2.860586  | 1.576330  |
| H | -1.034597 | 0.881968  | -1.945420 | H                           | -1.851477 | 3.523598  | 0.538752  |
| H | -0.878779 | -0.804652 | -3.706356 | H                           | -5.582832 | 3.246529  | -0.273713 |
| H | -1.302980 | -2.089063 | -2.560528 | H                           | -5.350938 | 1.798538  | -1.269518 |
| H | -4.593086 | -1.446949 | -3.438370 | H                           | -5.133845 | 1.713343  | 0.499944  |
| H | -3.245265 | -2.526085 | -3.843489 |                             |           |           |           |
| H | -2.659190 | -4.284860 | -2.315469 | glu_re_TS_gas_conformation2 |           |           |           |
| H | -2.924042 | -5.400941 | -0.117276 | C                           | 1.407613  | 3.945066  | -0.724205 |
| H | -4.257370 | -4.316051 | 1.670565  | C                           | 2.561870  | 3.183949  | -0.902933 |
| H | -5.293742 | -2.097250 | 1.265901  | C                           | 3.808045  | 3.808224  | -0.841907 |
| H | -5.010060 | -0.978354 | -0.924202 | C                           | 3.901524  | 5.174194  | -0.599448 |
| H | 2.741510  | 0.812684  | -0.036776 | C                           | 2.746377  | 5.931579  | -0.417245 |
| H | 3.087424  | 0.552418  | -1.755474 | C                           | 1.501510  | 5.313348  | -0.481006 |
| H | 4.897172  | 2.233552  | -0.439968 | C                           | 2.487922  | 1.692515  | -1.123167 |
| H | 5.629640  | 4.587378  | -0.626434 | O                           | 1.147861  | 1.342290  | -1.377620 |
| H | 4.051609  | 6.320014  | -1.448471 | C                           | 0.868818  | -0.038191 | -1.491316 |
| H | 1.742151  | 5.674851  | -2.083697 | C                           | 1.307604  | -0.810073 | -0.242043 |
| H | 1.017055  | 3.307209  | -1.897807 | C                           | 0.311276  | -1.900226 | 0.127170  |
| H | 3.054182  | -1.228753 | 1.272993  | C                           | -1.080646 | -1.347772 | 0.379253  |
| H | 2.566829  | -2.922428 | 1.136095  | N                           | -1.342836 | -0.163231 | -0.423018 |
| H | 4.955351  | -3.105218 | 2.170872  | C                           | -0.645358 | -0.091323 | -1.713516 |
| H | 7.289280  | -3.679582 | 1.580780  | O                           | 2.592184  | -1.336201 | -0.509033 |
| H | 8.096978  | -3.364736 | -0.745427 | C                           | 3.384060  | -1.554915 | 0.639718  |
| H | 6.555758  | -2.473397 | -2.471774 | C                           | 4.781888  | -1.931215 | 0.218673  |
| H | 4.214208  | -1.899226 | -1.870189 | C                           | 5.291419  | -1.517367 | -1.011636 |
| H | -0.237078 | -2.790650 | -1.001425 | C                           | 6.598693  | -1.833142 | -1.371031 |
| H | -0.551490 | 0.575952  | 1.968041  | C                           | 7.409244  | -2.559151 | -0.502775 |
| H | 1.824722  | 0.653098  | 4.190020  | C                           | 6.904311  | -2.973637 | 0.726946  |
| H | 1.998756  | 0.427470  | 2.469356  | C                           | 5.595367  | -2.664062 | 1.083017  |
| H | 2.201461  | -1.795786 | 3.602077  | C                           | -1.177278 | -1.183840 | -2.641530 |
| H | 0.660159  | -1.543533 | 4.417075  | O                           | -2.464225 | -0.780283 | -3.063117 |
| H | 0.690852  | -1.776987 | 2.677319  | C                           | -3.419747 | -1.824521 | -3.126440 |
| H | -0.921064 | 3.077040  | 2.783998  | C                           | -4.021311 | -2.140634 | -1.774490 |
| H | 0.495645  | 3.037338  | 3.809468  | C                           | -4.061434 | -3.441419 | -1.275734 |
| H | 0.956024  | 4.042719  | 1.487397  | C                           | -4.643960 | -3.707993 | -0.039318 |
| H | 1.962468  | 2.638966  | 1.822969  | C                           | -5.195240 | -2.671389 | 0.709012  |
| H | 0.554962  | 2.467271  | 0.783372  | C                           | -5.154716 | -1.365934 | 0.218687  |





|    |           |           |           |   |           |           |           |
|----|-----------|-----------|-----------|---|-----------|-----------|-----------|
| C  | 0.434437  | 0.317296  | -0.134458 | H | -6.875180 | 2.990303  | -0.541624 |
| N  | -0.384005 | -0.646306 | 0.636570  | H | -6.378475 | 4.419620  | 1.426194  |
| C  | -0.310556 | -2.016238 | 0.484749  | H | -4.020611 | 4.898393  | 2.040145  |
| C  | 0.852461  | -2.528016 | -0.321138 | H | -2.171216 | 3.923478  | 0.702247  |
| C  | -0.441488 | 0.979382  | -1.192130 | H | 3.887415  | -0.104308 | -2.156463 |
| O  | -1.532745 | 1.590690  | -0.560313 | H | 2.964484  | 1.351830  | -2.582855 |
| C  | -2.336338 | 2.339172  | -1.458396 | H | 5.936140  | 1.015052  | -3.020400 |
| C  | -3.479669 | 2.931657  | -0.680688 | H | 7.883886  | 2.421353  | -2.430804 |
| C  | -3.205908 | 3.740252  | 0.424720  | H | 7.780324  | 3.922859  | -0.455188 |
| C  | -4.243472 | 4.275219  | 1.179526  | H | 5.716394  | 4.003691  | 0.919817  |
| C  | -5.567583 | 4.005183  | 0.835427  | H | 3.769649  | 2.583311  | 0.325384  |
| C  | -5.846700 | 3.205385  | -0.268930 | H | 3.484690  | -3.720551 | 0.316380  |
| C  | -4.805010 | 2.670866  | -1.025228 | H | 4.652897  | -3.455282 | -0.989414 |
| O  | 2.710229  | 0.684099  | -0.646989 | H | 4.333402  | -3.176648 | 2.482485  |
| C  | 3.541389  | 0.865300  | -1.778586 | H | 5.688484  | -1.729340 | 3.969959  |
| C  | 4.719400  | 1.725022  | -1.393374 | H | 6.972218  | 0.168432  | 3.023712  |
| C  | 4.666382  | 2.567431  | -0.283589 | H | 6.906347  | 0.609187  | 0.569916  |
| C  | 5.764813  | 3.355594  | 0.050366  | H | 5.596511  | -0.871738 | -0.903354 |
| C  | 6.924424  | 3.310124  | -0.719308 | H | -4.675706 | 1.338983  | 3.249412  |
| C  | 6.982403  | 2.468080  | -1.828153 | H | -3.107864 | 1.852083  | 2.589119  |
| C  | 5.884743  | 1.679609  | -2.160633 | H | -4.346434 | 1.172334  | 1.512325  |
| O  | -1.124072 | -2.791260 | 0.979349  | H | -3.444418 | -0.307777 | 4.917892  |
| C  | -1.231595 | -0.025060 | 1.608880  | H | -2.229163 | -1.405653 | 4.239209  |
| O  | -2.403025 | -0.652205 | 1.715054  | H | -1.925752 | 0.350438  | 4.279544  |
| C  | -3.365878 | -0.288326 | 2.779838  | H | -5.210094 | -1.208481 | 3.394943  |
| C  | -3.901560 | 1.108955  | 2.510978  | H | -4.943867 | -1.270740 | 1.648469  |
| O  | -0.881693 | 0.939488  | 2.229493  | H | -4.025799 | -2.352010 | 2.738022  |
| C  | -4.450126 | -1.348638 | 2.622540  | H | 0.518973  | -2.606693 | -1.365419 |
| C  | -2.686184 | -0.416783 | 4.137887  | H | -2.173596 | -1.861249 | -1.440396 |
| Li | -2.787739 | -2.020536 | 0.286003  | H | -4.045076 | -0.461972 | -0.133966 |
| B  | -3.388459 | -2.083601 | -1.718837 | H | -3.902424 | 0.091230  | -1.747896 |
| C  | -4.245214 | -0.777753 | -1.174793 | H | -4.476883 | -2.585861 | -3.634920 |
| C  | -5.762710 | -0.911741 | -1.329795 | H | -2.788012 | -3.026431 | -3.674183 |
| C  | -3.475282 | -2.238410 | -3.336472 | H | -4.871365 | -3.710860 | -1.340118 |
| C  | -3.152782 | -0.957412 | -4.111875 | H | -4.026556 | -3.462799 | 0.133975  |
| C  | -3.859563 | -3.496131 | -0.969514 | H | -3.099131 | -1.111962 | -5.195517 |
| C  | -2.949488 | -4.694680 | -1.257152 | H | -3.907291 | -0.180742 | -3.935440 |
| H  | 1.483689  | -0.423781 | -1.883949 | H | -2.186910 | -0.542272 | -3.792292 |
| H  | 2.381455  | -1.469821 | 0.811272  | H | -6.305183 | -0.003112 | -1.037656 |
| H  | 1.057682  | -3.541109 | 0.030224  | H | -6.027411 | -1.138263 | -2.368678 |
| H  | 0.778319  | 1.065405  | 0.582027  | H | -6.153612 | -1.735154 | -0.719411 |
| H  | 0.175253  | 1.718363  | -1.731687 | H | -3.309715 | -5.627416 | -0.809445 |
| H  | -0.790504 | 0.216859  | -1.908527 | H | -2.865760 | -4.857093 | -2.335570 |
| H  | -1.720699 | 3.135150  | -1.907903 | H | -1.937653 | -4.512731 | -0.875302 |
| H  | -2.702822 | 1.696725  | -2.271690 |   |           |           |           |
| H  | -5.024628 | 2.034476  | -1.878449 |   |           |           |           |

glu\_si\_TS\_gas\_conformation1

|   |           |           |           |   |           |           |           |
|---|-----------|-----------|-----------|---|-----------|-----------|-----------|
| C | 4.385949  | -2.335927 | -0.804189 | H | -1.772481 | -0.438640 | -2.248317 |
| C | 4.276062  | -1.637139 | -2.008964 | H | -2.293360 | 1.167403  | 0.175866  |
| C | 5.418076  | -1.097564 | -2.596453 | H | -0.527116 | 2.876517  | -0.440334 |
| C | 6.665057  | -1.263429 | -1.996418 | H | -0.368282 | -1.949848 | -0.506807 |
| C | 6.772692  | -1.964628 | -0.799866 | H | 0.361259  | -1.781452 | -2.708494 |
| C | 5.629874  | -2.497439 | -0.203696 | H | 0.610534  | -0.028807 | -2.664740 |
| C | 2.920175  | -1.469332 | -2.642509 | H | 2.600618  | -2.404547 | -3.131440 |
| O | 2.003901  | -1.138851 | -1.620694 | H | 2.949012  | -0.682791 | -3.411609 |
| C | 0.690090  | -0.949445 | -2.065027 | H | 5.330853  | -0.536335 | -3.523574 |
| C | -0.220479 | -0.919447 | -0.829956 | H | 7.548496  | -0.834479 | -2.458455 |
| C | -1.613201 | -0.362399 | -1.157873 | H | 7.742378  | -2.091299 | -0.328806 |
| C | -1.783165 | 1.124097  | -0.798234 | H | 5.709378  | -3.040267 | 0.733877  |
| C | -0.423291 | 1.815228  | -0.672855 | H | 3.483256  | -2.720700 | -0.335157 |
| C | 0.292614  | 1.176729  | 0.501710  | H | -4.231217 | -0.022210 | -0.183323 |
| N | 0.405282  | -0.252656 | 0.320285  | H | -4.018676 | -0.654595 | -1.819210 |
| O | -2.535362 | -1.188653 | -0.484576 | H | -3.169405 | -3.522394 | -0.714033 |
| C | -3.895094 | -0.901015 | -0.751665 | H | -4.598368 | -5.488890 | -0.207933 |
| C | -4.737549 | -2.099185 | -0.390867 | H | -6.978634 | -5.166023 | 0.413677  |
| C | -6.073265 | -1.922494 | -0.029100 | H | -7.917458 | -2.871014 | 0.534120  |
| C | -6.879706 | -3.021006 | 0.252497  | H | -6.476256 | -0.914610 | 0.039432  |
| C | -6.353225 | -4.308475 | 0.186547  | H | -2.536696 | 3.585736  | -0.885384 |
| C | -5.017534 | -4.488419 | -0.162342 | H | -3.515717 | 3.410339  | -2.352803 |
| C | -4.213509 | -3.389963 | -0.452307 | H | -3.470618 | 3.054599  | 1.300400  |
| O | -2.575198 | 1.718611  | -1.810002 | H | -5.428761 | 2.411470  | 2.677637  |
| C | -3.228461 | 2.920038  | -1.418696 | H | -7.519589 | 1.649669  | 1.581656  |
| C | -4.445051 | 2.639754  | -0.571635 | H | -7.647560 | 1.534525  | -0.894038 |
| C | -5.627135 | 2.211211  | -1.180781 | H | -5.671813 | 2.143049  | -2.264853 |
| C | -6.731544 | 1.862060  | -0.411723 | H | 4.202425  | -2.263399 | 3.576515  |
| C | -6.660136 | 1.928378  | 0.980193  | H | 3.272336  | -2.750594 | 2.138229  |
| C | -5.487956 | 2.356783  | 1.595549  | H | 4.285524  | -1.289802 | 2.088832  |
| C | -4.386929 | 2.717346  | 0.820318  | H | 1.869572  | -2.248523 | 4.904323  |
| O | 0.105172  | 1.633225  | 1.666243  | H | 0.557796  | -1.264127 | 4.227079  |
| C | 1.129040  | -1.074589 | 1.159189  | H | 1.087967  | -2.740753 | 3.387389  |
| O | 1.159421  | -2.280645 | 1.082025  | H | 3.405825  | -0.288772 | 4.997592  |
| O | 1.825941  | -0.370749 | 2.088135  | H | 3.691069  | 0.699867  | 3.564911  |
| C | 2.458561  | -1.063959 | 3.217898  | H | 2.094847  | 0.726982  | 4.386240  |
| C | 2.940450  | 0.095767  | 4.087265  | H | 0.139931  | 1.721465  | -1.604373 |
| C | 1.421406  | -1.886479 | 3.974688  | H | 1.700926  | 1.614750  | 0.126667  |
| C | 3.629766  | -1.898801 | 2.718220  | H | 4.039889  | 0.926074  | 1.427059  |
| B | 2.859275  | 2.376100  | 0.102606  | H | 3.839842  | 0.369265  | -0.214232 |
| C | 2.819873  | 2.997796  | -1.385399 | H | 3.618026  | 3.753368  | -1.462030 |
| C | 2.991786  | 1.967561  | -2.502151 | H | 1.887383  | 3.554889  | -1.554144 |
| C | 2.728140  | 3.527612  | 1.270795  | H | 3.685447  | 4.060996  | 1.170193  |
| C | 1.582114  | 4.538171  | 1.148931  | H | 2.786023  | 3.193742  | 2.331601  |
| C | 4.023410  | 1.275047  | 0.379618  | H | 2.925603  | 2.406710  | -3.503592 |
| C | 5.427828  | 1.809359  | 0.061007  | H | 3.954906  | 1.449770  | -2.423185 |

|    |          |          |           |
|----|----------|----------|-----------|
| H  | 2.224655 | 1.191791 | -2.417139 |
| H  | 6.200601 | 1.052689 | 0.232413  |
| H  | 5.502013 | 2.120121 | -0.986347 |
| H  | 5.672371 | 2.684744 | 0.673721  |
| H  | 1.662553 | 5.347757 | 1.881524  |
| H  | 1.581888 | 4.994690 | 0.154941  |
| H  | 0.615103 | 4.048117 | 1.297196  |
| Li | 1.914322 | 1.559173 | 1.988960  |

glu\_si\_product\_gas\_conformation1

|   |           |           |           |
|---|-----------|-----------|-----------|
| C | 4.381206  | -2.278953 | -0.483776 |
| C | 4.366855  | -1.762911 | -1.782092 |
| C | 5.572495  | -1.475697 | -2.420158 |
| C | 6.785716  | -1.727054 | -1.782582 |
| C | 6.798776  | -2.253330 | -0.494374 |
| C | 5.593739  | -2.518401 | 0.156182  |
| C | 3.051781  | -1.568313 | -2.493144 |
| O | 2.071866  | -1.229037 | -1.542018 |
| C | 0.774331  | -1.134317 | -2.071275 |
| C | -0.212859 | -1.014406 | -0.898149 |
| C | -1.597360 | -0.534635 | -1.355029 |
| C | -1.793855 | 0.968608  | -1.128922 |
| C | -0.457365 | 1.697323  | -1.152971 |
| C | 0.318346  | 1.316504  | 0.113884  |
| N | 0.316141  | -0.201411 | 0.198310  |
| O | -2.529684 | -1.323147 | -0.645169 |
| C | -3.886868 | -1.036088 | -0.917456 |
| C | -4.744482 | -2.154100 | -0.380967 |
| C | -6.040848 | -1.883644 | 0.056930  |
| C | -6.861973 | -2.911646 | 0.511087  |
| C | -6.388448 | -4.220687 | 0.541421  |
| C | -5.090799 | -4.493756 | 0.116142  |
| C | -4.272955 | -3.466425 | -0.344635 |
| O | -2.686389 | 1.436350  | -2.130961 |
| C | -3.303082 | 2.679518  | -1.831617 |
| C | -4.379763 | 2.550596  | -0.780407 |
| C | -5.674576 | 2.179727  | -1.150054 |
| C | -6.657136 | 1.980800  | -0.185134 |
| C | -6.347491 | 2.141056  | 1.164885  |
| C | -5.059787 | 2.511650  | 1.542180  |
| C | -4.080752 | 2.721846  | 0.573229  |
| O | -0.212341 | 1.915650  | 1.196486  |
| C | 0.983343  | -0.894991 | 1.147998  |
| O | 1.106183  | -2.102701 | 1.207966  |
| O | 1.537049  | -0.079041 | 2.127561  |
| C | 2.164852  | -0.706460 | 3.295665  |

|   |           |           |           |
|---|-----------|-----------|-----------|
| C | 2.613670  | 0.499037  | 4.123068  |
| C | 1.131123  | -1.515892 | 4.073188  |
| C | 3.376676  | -1.543082 | 2.894669  |
| B | 3.294216  | 2.610613  | 0.063579  |
| C | 3.055918  | 3.036718  | -1.441679 |
| C | 3.098133  | 1.901974  | -2.468842 |
| C | 2.886702  | 3.588759  | 1.243997  |
| C | 1.809210  | 4.640765  | 0.974150  |
| C | 4.076534  | 1.279321  | 0.398076  |
| C | 5.559579  | 1.345478  | -0.013944 |
| H | -1.707834 | -0.716091 | -2.440177 |
| H | -2.222935 | 1.089799  | -0.125138 |
| H | -0.599917 | 2.778532  | -1.085467 |
| H | -0.350024 | -2.014620 | -0.487812 |
| H | 0.517856  | -2.038623 | -2.645875 |
| H | 0.710667  | -0.282901 | -2.766633 |
| H | 2.762319  | -2.500909 | -3.006097 |
| H | 3.139943  | -0.784939 | -3.262854 |
| H | 5.562676  | -1.057191 | -3.424003 |
| H | 7.719012  | -1.503837 | -2.289818 |
| H | 7.742895  | -2.447582 | 0.004790  |
| H | 5.598175  | -2.920507 | 1.165490  |
| H | 3.433594  | -2.476297 | 0.012206  |
| H | -4.190097 | -0.084969 | -0.459405 |
| H | -4.033486 | -0.925861 | -2.004437 |
| H | -3.255731 | -3.666748 | -0.664094 |
| H | -4.712850 | -5.511179 | 0.146344  |
| H | -7.025242 | -5.022919 | 0.900992  |
| H | -7.868719 | -2.689129 | 0.851495  |
| H | -6.399761 | -0.856775 | 0.050131  |
| H | -2.555884 | 3.418111  | -1.512078 |
| H | -3.735107 | 3.023684  | -2.775582 |
| H | -3.069371 | 2.996991  | 0.867511  |
| H | -4.815636 | 2.636407  | 2.592266  |
| H | -7.110451 | 1.980338  | 1.920028  |
| H | -7.662241 | 1.698134  | -0.483418 |
| H | -5.906616 | 2.038892  | -2.202924 |
| H | 3.962710  | -1.770223 | 3.790634  |
| H | 3.064647  | -2.475898 | 2.426963  |
| H | 4.008922  | -0.990188 | 2.194166  |
| H | 1.571572  | -1.846760 | 5.018355  |
| H | 0.254576  | -0.899732 | 4.300074  |
| H | 0.812159  | -2.386840 | 3.503176  |
| H | 3.119014  | 0.162519  | 5.030861  |
| H | 3.308739  | 1.129744  | 3.559885  |
| H | 1.755155  | 1.099722  | 4.460908  |



|    |          |          |           |    |           |           |           |
|----|----------|----------|-----------|----|-----------|-----------|-----------|
| H  | 0.082836 | 1.493224 | -2.082596 | C  | 6.108493  | 1.756997  | 0.045217  |
| H  | 1.392643 | 1.568868 | -0.048186 | C  | 6.854729  | 2.917131  | 0.236030  |
| H  | 4.022980 | 1.044526 | 1.468196  | C  | 6.331299  | 4.151861  | -0.135012 |
| H  | 3.600277 | 0.437051 | -0.127492 | C  | 5.058417  | 4.221249  | -0.697549 |
| H  | 3.824604 | 3.791876 | -1.679365 | C  | 4.316993  | 3.061426  | -0.894146 |
| H  | 2.104901 | 3.579346 | -1.528008 | O  | -0.874732 | -2.316784 | 1.288322  |
| H  | 3.836525 | 4.079474 | 1.523889  | C  | -1.138245 | 0.458753  | 1.242727  |
| H  | 2.648393 | 3.008093 | 2.153452  | O  | -2.110272 | -0.022939 | 1.792488  |
| H  | 2.866551 | 2.250133 | -3.480203 | O  | -0.716966 | 1.694411  | 1.367434  |
| H  | 4.078766 | 1.414727 | -2.497752 | Li | -2.752566 | -1.809921 | 1.398659  |
| H  | 2.376163 | 1.123121 | -2.199771 | C  | -3.441008 | -3.919415 | 0.611820  |
| H  | 6.056137 | 0.386418 | 0.160717  | C  | -2.483287 | -4.503655 | -0.431204 |
| H  | 5.678538 | 1.584204 | -1.075064 | B  | -4.252492 | -2.568437 | 0.095100  |
| H  | 6.095177 | 2.113518 | 0.554781  | C  | -5.109032 | -1.895821 | 1.355123  |
| H  | 1.657554 | 5.304118 | 1.831586  | C  | -6.250243 | -2.803681 | 1.831512  |
| H  | 2.083904 | 5.266884 | 0.120320  | C  | -5.201103 | -2.952006 | -1.172671 |
| H  | 0.854973 | 4.151185 | 0.752082  | C  | -6.095626 | -1.839921 | -1.727450 |
| Li | 0.882427 | 1.654645 | 2.492898  | H  | 1.898668  | -0.150318 | -2.162592 |

glu\_si\_reactant\_gas\_conformation2

|   |           |           |           |   |           |           |           |
|---|-----------|-----------|-----------|---|-----------|-----------|-----------|
| C | 4.827832  | -2.873855 | 1.167223  | H | 2.501404  | -1.499495 | 0.414633  |
| C | 4.828504  | -2.888867 | -0.227244 | H | 0.838504  | -3.349719 | -0.151226 |
| C | 5.957167  | -2.431438 | -0.913031 | H | 0.539243  | 1.444466  | -0.403712 |
| C | 7.064277  | -1.962391 | -0.216430 | H | -0.135419 | 0.941972  | -2.756971 |
| C | 7.051453  | -1.941669 | 1.179092  | H | -0.864424 | -0.588175 | -2.199724 |
| C | 5.933377  | -2.397390 | 1.870271  | H | -2.632431 | 1.267991  | -3.287500 |
| C | 3.607531  | -3.306916 | -1.007408 | H | -3.144916 | -0.116370 | -2.274444 |
| O | 2.898226  | -2.178765 | -1.510717 | H | -3.484637 | 3.542422  | -2.807255 |
| C | 2.033167  | -1.558529 | -0.581050 | H | -5.227348 | 4.939307  | -1.724814 |
| C | 1.786373  | -0.123992 | -1.064313 | H | -6.703515 | 3.954348  | 0.007030  |
| C | 0.387447  | 0.415037  | -0.723549 | H | -6.434566 | 1.569672  | 0.654870  |
| N | -0.267914 | -0.281306 | 0.406205  | H | -4.668460 | 0.190011  | -0.417167 |
| C | -0.235633 | -1.661688 | 0.479010  | H | 4.440932  | -0.255617 | -0.149852 |
| C | 0.713139  | -2.320227 | -0.489520 | H | 4.171654  | 0.232744  | -1.827879 |
| C | -0.593344 | 0.435354  | -1.892604 | H | 3.320260  | 3.109240  | -1.321127 |
| O | -1.723355 | 1.127510  | -1.433183 | H | 4.642959  | 5.182672  | -0.983190 |
| C | -2.869112 | 0.947964  | -2.261582 | H | 6.908889  | 5.057801  | 0.018907  |
| C | -3.978818 | 1.777193  | -1.683064 | H | 7.841495  | 2.856378  | 0.684439  |
| C | -4.806231 | 1.229117  | -0.703691 | H | 6.507462  | 0.791996  | 0.348895  |
| C | -5.789121 | 2.008330  | -0.100419 | H | 2.953498  | -3.936314 | -0.389771 |
| C | -5.938177 | 3.344848  | -0.463543 | H | 3.894143  | -3.884976 | -1.889672 |
| C | -5.109581 | 3.899040  | -1.438003 | H | 3.957061  | -3.239059 | 1.707227  |
| C | -4.134481 | 3.114974  | -2.047544 | H | 5.921565  | -2.386332 | 2.955167  |
| O | 2.687355  | 0.804564  | -0.508384 | H | 7.915465  | -1.575386 | 1.724673  |
| C | 4.057766  | 0.557131  | -0.781031 | H | 7.937638  | -1.611778 | -0.757436 |
| C | 4.839079  | 1.820487  | -0.527089 | H | 5.955820  | -2.435929 | -2.000079 |
|   |           |           |           | H | 0.250676  | -2.356477 | -1.483470 |
|   |           |           |           | H | -3.386999 | -1.724788 | -0.305779 |

|   |           |           |           |    |           |           |           |
|---|-----------|-----------|-----------|----|-----------|-----------|-----------|
| H | -4.513360 | -1.654268 | 2.263870  | C  | 3.403220  | 2.799014  | -0.379338 |
| H | -5.541795 | -0.925430 | 1.071626  | C  | 2.429422  | 3.783163  | -0.202413 |
| H | -5.840018 | -3.802700 | -0.887157 | C  | 2.749389  | 5.130343  | -0.360934 |
| H | -4.581796 | -3.332011 | -1.997884 | C  | 4.050417  | 5.502413  | -0.686423 |
| H | -4.199699 | -4.677590 | 0.852390  | C  | 5.032890  | 4.525321  | -0.853055 |
| H | -2.884028 | -3.817125 | 1.565117  | C  | 4.707128  | 3.182143  | -0.703456 |
| H | -6.770142 | -2.194025 | -2.515920 | C  | 0.686486  | -1.125452 | -4.671453 |
| H | -6.720973 | -1.391021 | -0.944793 | O  | -0.555975 | -1.588961 | -5.117323 |
| H | -5.500406 | -1.025932 | -2.158066 | C  | -0.562828 | -2.956546 | -5.463596 |
| H | -6.815414 | -2.375298 | 2.666756  | C  | -1.990270 | -3.395769 | -5.667868 |
| H | -6.956422 | -2.987875 | 1.015529  | C  | -2.974455 | -2.454920 | -5.964444 |
| H | -5.871404 | -3.778737 | 2.154708  | C  | -4.296773 | -2.851496 | -6.141148 |
| H | -1.871164 | -5.328410 | -0.048181 | C  | -4.643538 | -4.195231 | -6.031365 |
| H | -3.038879 | -4.879520 | -1.295721 | C  | -3.661610 | -5.139628 | -5.740183 |
| H | -1.801546 | -3.729710 | -0.807830 | C  | -2.341350 | -4.740842 | -5.555683 |
| C | -1.471545 | 2.695185  | 2.143989  | C  | -1.789587 | 1.106947  | -4.548286 |
| C | -0.666446 | 3.962943  | 1.892991  | O  | -1.557389 | 1.187234  | -5.854544 |
| C | -2.884550 | 2.830199  | 1.596309  | C  | -2.514548 | 1.840628  | -6.751917 |
| C | -1.439981 | 2.304701  | 3.616067  | C  | -2.797402 | 3.256494  | -6.259463 |
| H | -1.108093 | 4.792835  | 2.449936  | O  | -1.346027 | 1.874964  | -1.860394 |
| H | 0.369269  | 3.832331  | 2.216662  | O  | -2.895841 | 1.294782  | -4.042446 |
| H | -0.676227 | 4.211454  | 0.828638  | C  | -1.750138 | 1.873077  | -8.069610 |
| H | -1.897141 | 3.105928  | 4.203267  | C  | -3.786493 | 1.010393  | -6.891408 |
| H | -1.996911 | 1.383983  | 3.793281  | Li | -3.011694 | 1.098230  | -2.165114 |
| H | -0.408099 | 2.176563  | 3.954758  | C  | -3.217171 | -0.095543 | -0.176298 |
| H | -3.350982 | 3.711804  | 2.045674  | B  | -2.680850 | -1.024419 | -1.414941 |
| H | -2.860802 | 2.963754  | 0.510977  | C  | -1.789156 | -2.287168 | -0.952062 |
| H | -3.493949 | 1.957083  | 1.828194  | C  | -1.282903 | -3.125001 | -2.127668 |

glu\_si\_TS\_gas\_conformation2

|   |           |          |           |   |           |           |           |
|---|-----------|----------|-----------|---|-----------|-----------|-----------|
| C | 3.609772  | 3.485158 | -6.371578 | C | -2.203994 | 0.328778  | 0.891215  |
| C | 3.775725  | 3.772106 | -5.016403 | C | -3.798896 | -1.340759 | -2.554386 |
| C | 4.415211  | 4.953941 | -4.643532 | C | -4.769239 | -2.446653 | -2.113580 |
| C | 4.895365  | 5.831952 | -5.611480 | H | 2.649483  | 0.236355  | -3.882171 |
| C | 4.730216  | 5.539681 | -6.962355 | H | 1.409480  | 2.204286  | -2.068699 |
| C | 4.082778  | 4.365376 | -7.339448 | H | 0.344295  | 0.423980  | -0.633319 |
| C | 3.306471  | 2.801363 | -3.962481 | H | 0.561510  | 0.853444  | -5.450843 |
| O | 2.127485  | 2.160377 | -4.417133 | H | 1.476196  | -1.309448 | -5.418295 |
| C | 1.819183  | 0.953628 | -3.755142 | H | 0.982732  | -1.651119 | -3.749652 |
| C | 1.639947  | 1.142184 | -2.238388 | H | 0.030671  | -3.109368 | -6.380354 |
| C | 0.470048  | 0.308426 | -1.710962 | H | -0.099324 | -3.557120 | -4.665692 |
| C | -0.775613 | 0.869321 | -2.363263 | H | -1.580968 | -5.477569 | -5.307000 |
| N | -0.678910 | 0.787362 | -3.815851 | H | -3.926725 | -6.187639 | -5.642967 |
| C | 0.578050  | 0.389857 | -4.465389 | H | -5.675035 | -4.506011 | -6.162664 |
| O | 2.863363  | 0.786520 | -1.621662 | H | -5.057728 | -2.105370 | -6.351734 |
| C | 3.048680  | 1.333625 | -0.321351 | H | -2.693778 | -1.408628 | -6.019638 |
|   |           |          |           | H | 3.127852  | 3.332546  | -3.017117 |
|   |           |          |           | H | 4.082481  | 2.044861  | -3.761068 |

|                                  |           |           |           |    |           |           |           |
|----------------------------------|-----------|-----------|-----------|----|-----------|-----------|-----------|
| H                                | 3.093300  | 2.574170  | -6.655746 | C  | -3.221120 | 1.235759  | -2.858027 |
| H                                | 3.944561  | 4.135936  | -8.391589 | O  | -2.088655 | 1.265136  | -2.029106 |
| H                                | 5.099024  | 6.226572  | -7.717498 | C  | -0.904232 | 0.796866  | -2.625420 |
| H                                | 5.389933  | 6.750269  | -5.310228 | C  | 0.084039  | 0.636028  | -1.470017 |
| H                                | 4.527395  | 5.186590  | -3.587086 | C  | 1.558869  | 0.399435  | -1.825257 |
| H                                | 2.154714  | 1.181352  | 0.298176  | C  | 1.930795  | -1.081676 | -1.745745 |
| H                                | 3.866477  | 0.757484  | 0.119608  | C  | 0.724716  | -1.929589 | -2.114930 |
| H                                | 1.411958  | 3.491868  | 0.050565  | C  | -0.278799 | -1.885682 | -0.946561 |
| H                                | 1.982813  | 5.886931  | -0.229715 | N  | -0.391195 | -0.388219 | -0.538588 |
| H                                | 4.301283  | 6.551618  | -0.807377 | O  | 2.264081  | 1.194168  | -0.887104 |
| H                                | 6.049638  | 4.812994  | -1.102331 | C  | 3.674388  | 1.102093  | -0.935788 |
| H                                | 5.465108  | 2.416411  | -0.848178 | C  | 4.252305  | 2.155566  | -0.024969 |
| H                                | 0.613888  | -0.752378 | -1.929143 | C  | 3.603730  | 3.377031  | 0.162315  |
| H                                | -1.719214 | -0.304742 | -2.105045 | C  | 4.161274  | 4.350010  | 0.986614  |
| H                                | -4.408881 | -0.464229 | -2.839680 | C  | 5.376094  | 4.114704  | 1.626055  |
| H                                | -3.306212 | -1.652601 | -3.484157 | C  | 6.026824  | 2.897577  | 1.442503  |
| H                                | -2.384018 | -2.919389 | -0.274604 | C  | 5.463584  | 1.921130  | 0.626048  |
| H                                | -0.930896 | -1.956669 | -0.350263 | O  | 3.045352  | -1.292940 | -2.599171 |
| H                                | -3.972349 | -0.749887 | 0.286675  | C  | 3.749352  | -2.501267 | -2.347420 |
| H                                | -3.828890 | 0.793915  | -0.438876 | C  | 4.560836  | -2.443992 | -1.074440 |
| H                                | -0.573349 | -3.905047 | -1.828277 | C  | 4.006756  | -2.844600 | 0.144274  |
| H                                | -2.107225 | -3.609578 | -2.663165 | C  | 4.731433  | -2.702464 | 1.325883  |
| H                                | -0.793576 | -2.473114 | -2.860993 | C  | 6.018051  | -2.171773 | 1.298229  |
| H                                | -5.503087 | -2.680513 | -2.892205 | C  | 6.583362  | -1.784776 | 0.084138  |
| H                                | -4.231781 | -3.372238 | -1.883636 | C  | 5.853725  | -1.916450 | -1.093548 |
| H                                | -5.321153 | -2.160576 | -1.211182 | O  | 0.131834  | -2.665460 | 0.059175  |
| H                                | -2.685144 | 0.772243  | 1.768994  | Li | -0.803852 | -2.552971 | 1.514379  |
| H                                | -1.624632 | -0.533577 | 1.234984  | C  | -0.991579 | -0.039708 | 0.600927  |
| H                                | -1.508687 | 1.068983  | 0.484450  | O  | -1.439279 | -0.842298 | 1.449400  |
| H                                | -2.377432 | 2.309339  | -8.851109 | O  | -1.102239 | 1.285443  | 0.801000  |
| H                                | -0.841469 | 2.472786  | -7.971583 | C  | -0.714085 | 1.844554  | 2.093737  |
| H                                | -1.472956 | 0.858645  | -8.367368 | C  | -1.803941 | 1.597774  | 3.129332  |
| H                                | -3.344419 | 3.799476  | -7.035000 | C  | 0.635143  | 1.260661  | 2.501434  |
| H                                | -3.393345 | 3.252100  | -5.346921 | C  | -0.582135 | 3.331065  | 1.786769  |
| H                                | -1.856467 | 3.781509  | -6.071501 | C  | -2.938394 | -3.034114 | 2.841282  |
| H                                | -4.481546 | 1.541558  | -7.548527 | C  | -2.411321 | -4.427136 | 2.457487  |
| H                                | -3.565294 | 0.042274  | -7.348673 | B  | -3.563963 | -2.101905 | 1.703737  |
| H                                | -4.264702 | 0.854977  | -5.923781 | C  | -4.359238 | -0.811223 | 2.144878  |
| glu_si_product_gas_conformation2 |           |           |           | C  | -5.878120 | -1.061496 | 2.095461  |
| C                                | -5.715643 | 1.301490  | -2.581949 | C  | -3.644020 | -2.625709 | 0.214747  |
| C                                | -4.451951 | 1.489576  | -2.020413 | C  | -3.935297 | -1.578964 | -0.862804 |
| C                                | -4.345172 | 1.855920  | -0.679204 | H  | 1.772899  | 0.746537  | -2.851301 |
| C                                | -5.495338 | 2.015209  | 0.091560  | H  | 2.187555  | -1.295830 | -0.699132 |
| C                                | -6.754158 | 1.815796  | -0.467650 | H  | 0.991307  | -2.983350 | -2.211327 |
| C                                | -6.862013 | 1.463697  | -1.811701 | H  | 0.066159  | 1.590255  | -0.945972 |
|                                  |           |           |           | H  | -0.512161 | 1.520160  | -3.357723 |

|   |           |           |           |                         |           |           |           |
|---|-----------|-----------|-----------|-------------------------|-----------|-----------|-----------|
| H | -1.098135 | -0.150262 | -3.148451 | H                       | -2.768544 | 1.941464  | 2.742930  |
| H | -3.133376 | 1.987182  | -3.660289 | H                       | -1.884752 | 0.536778  | 3.366057  |
| H | -3.311424 | 0.249195  | -3.342900 |                         |           |           |           |
| H | -5.801712 | 1.006751  | -3.625599 | glu_re_reactant_solvent |           |           |           |
| H | -7.839145 | 1.305287  | -2.257198 | C                       | 2.050832  | 3.584806  | -1.725159 |
| H | -7.646748 | 1.930772  | 0.139280  | C                       | 2.912301  | 2.618582  | -1.209064 |
| H | -5.404547 | 2.283921  | 1.140593  | C                       | 4.185326  | 2.998584  | -0.778006 |
| H | -3.359612 | 1.975926  | -0.238140 | C                       | 4.593895  | 4.324804  | -0.866031 |
| H | 4.018156  | 0.109385  | -0.619030 | C                       | 3.728595  | 5.289241  | -1.380486 |
| H | 4.021519  | 1.245821  | -1.971892 | C                       | 2.457847  | 4.915155  | -1.807300 |
| H | 2.656155  | 3.550042  | -0.337492 | C                       | 2.514753  | 1.166602  | -1.113715 |
| H | 3.647289  | 5.295689  | 1.129682  | O                       | 1.122392  | 1.043779  | -1.321063 |
| H | 5.810407  | 4.873886  | 2.268891  | C                       | 0.652187  | -0.275585 | -1.482273 |
| H | 6.969251  | 2.703698  | 1.945391  | C                       | 1.032566  | -1.180702 | -0.307885 |
| H | 5.957389  | 0.960353  | 0.498344  | C                       | -0.062481 | -2.234203 | -0.094464 |
| H | 3.056697  | -3.352268 | -2.309715 | C                       | -1.274998 | -1.478516 | 0.385790  |
| H | 4.407345  | -2.637899 | -3.210141 | N                       | -1.594405 | -0.364091 | -0.388019 |
| H | 2.993725  | -3.244047 | 0.166317  | C                       | -0.869224 | -0.148725 | -1.663518 |
| H | 4.289824  | -3.007917 | 2.269305  | O                       | 2.281492  | -1.763394 | -0.590424 |
| H | 6.582011  | -2.064640 | 2.219519  | C                       | 3.015035  | -2.128689 | 0.563909  |
| H | 7.590512  | -1.379622 | 0.056466  | C                       | 4.424040  | -2.498763 | 0.175293  |
| H | 6.284918  | -1.600237 | -2.040398 | C                       | 4.958174  | -2.129381 | -1.058011 |
| H | 0.315595  | -1.602911 | -3.077224 | C                       | 6.278931  | -2.444542 | -1.373012 |
| H | -1.292447 | -2.128702 | -1.323560 | C                       | 7.075866  | -3.125654 | -0.457875 |
| H | -4.080101 | -0.487255 | 3.155415  | C                       | 6.544691  | -3.497061 | 0.776157  |
| H | -4.114378 | 0.014326  | 1.464182  | C                       | 5.224895  | -3.188036 | 1.088370  |
| H | -4.457891 | -3.373979 | 0.232711  | C                       | -1.447733 | -1.019689 | -2.777318 |
| H | -2.753905 | -3.213617 | -0.054344 | O                       | -2.814141 | -0.708340 | -2.926914 |
| H | -3.734125 | -3.164117 | 3.589600  | C                       | -3.653949 | -1.848879 | -3.056948 |
| H | -2.184952 | -2.451049 | 3.397771  | C                       | -3.830126 | -2.570240 | -1.741985 |
| H | -4.006670 | -2.027319 | -1.860188 | C                       | -3.231652 | -3.807879 | -1.503170 |
| H | -4.873658 | -1.048416 | -0.670550 | C                       | -3.389184 | -4.446420 | -0.272220 |
| H | -3.148427 | -0.815684 | -0.896190 | C                       | -4.149035 | -3.848516 | 0.727460  |
| H | -6.441409 | -0.169592 | 2.386156  | C                       | -4.738852 | -2.603967 | 0.502309  |
| H | -6.205251 | -1.337070 | 1.087953  | C                       | -4.575214 | -1.968789 | -0.722582 |
| H | -6.175002 | -1.871486 | 2.771428  | C                       | -2.565614 | 0.555923  | 0.036544  |
| H | -2.024763 | -4.973953 | 3.322072  | O                       | -3.126393 | 0.499166  | 1.119031  |
| H | -3.213896 | -5.025680 | 2.017279  | Li                      | -2.071614 | -0.211118 | 2.592627  |
| H | -1.618075 | -4.429292 | 1.694937  | O                       | -1.816715 | -1.760024 | 1.443505  |
| H | -0.317607 | 3.879157  | 2.694703  | O                       | -2.772799 | 1.486603  | -0.868059 |
| H | 0.199411  | 3.493262  | 1.039373  | C                       | -3.571667 | 2.686182  | -0.565490 |
| H | -1.527092 | 3.723121  | 1.400815  | C                       | -3.424009 | 3.494706  | -1.847446 |
| H | 1.011593  | 1.784548  | 3.384125  | C                       | -5.024304 | 2.290254  | -0.336016 |
| H | 0.544665  | 0.198821  | 2.747035  | C                       | -2.956183 | 3.423708  | 0.617799  |
| H | 1.358044  | 1.378677  | 1.686716  | C                       | 0.170828  | 2.627265  | 2.879675  |
| H | -1.573977 | 2.156820  | 4.041481  | C                       | 1.086461  | 2.941291  | 1.692467  |

|   |           |           |           |                   |           |           |           |
|---|-----------|-----------|-----------|-------------------|-----------|-----------|-----------|
| B | -0.083714 | 1.027088  | 3.095395  | H                 | -3.037138 | 1.415743  | 5.274674  |
| C | 1.315369  | 0.204235  | 3.320690  | H                 | -2.108584 | 2.693980  | 4.477544  |
| C | 1.161854  | -1.307780 | 3.511589  | H                 | -3.013428 | 1.554504  | 3.515574  |
| C | -1.125071 | 0.760460  | 4.369907  | H                 | -3.999457 | 4.419890  | -1.767015 |
| C | -2.389057 | 1.638905  | 4.419816  | H                 | -2.374557 | 3.748382  | -2.019146 |
| H | 1.091123  | -0.725815 | -2.389742 | H                 | -3.792842 | 2.921502  | -2.701974 |
| H | 1.092164  | -0.552579 | 0.597253  | H                 | -3.432685 | 4.403652  | 0.708128  |
| H | 0.200029  | -2.943790 | 0.690572  | H                 | -3.094563 | 2.881451  | 1.554104  |
| H | -1.048223 | 0.885780  | -1.943922 | H                 | -1.884729 | 3.574736  | 0.452902  |
| H | -0.905324 | -0.798790 | -3.706702 | H                 | -5.626123 | 3.197991  | -0.238911 |
| H | -1.314033 | -2.086067 | -2.561136 | H                 | -5.397964 | 1.722286  | -1.193090 |
| H | -4.613001 | -1.462134 | -3.411295 | H                 | -5.135701 | 1.696819  | 0.571571  |
| H | -3.258999 | -2.532577 | -3.820766 |                   |           |           |           |
| H | -2.653358 | -4.284760 | -2.291795 | glu_re_TS_solvent |           |           |           |
| H | -2.923109 | -5.411367 | -0.100237 | C                 | 1.702668  | 3.969200  | -0.156928 |
| H | -4.276761 | -4.344007 | 1.684445  | C                 | 2.809173  | 3.190945  | -0.497869 |
| H | -5.321796 | -2.127992 | 1.284597  | C                 | 4.081341  | 3.764837  | -0.470962 |
| H | -5.030718 | -0.996547 | -0.899169 | C                 | 4.247318  | 5.096638  | -0.104217 |
| H | 2.796788  | 0.776993  | -0.123326 | C                 | 3.139448  | 5.871055  | 0.236237  |
| H | 3.057158  | 0.569800  | -1.864179 | C                 | 1.868763  | 5.303440  | 0.208130  |
| H | 4.857930  | 2.249668  | -0.365983 | C                 | 2.653821  | 1.734143  | -0.861966 |
| H | 5.584795  | 4.608304  | -0.525733 | C                 | 1.297076  | 1.488185  | -1.156194 |
| H | 4.043385  | 6.325968  | -1.443242 | C                 | 0.968120  | 0.157124  | -1.499077 |
| H | 1.776555  | 5.661252  | -2.204525 | C                 | 1.374164  | -0.833864 | -0.404036 |
| H | 1.058289  | 3.290309  | -2.047655 | C                 | 0.354355  | -1.953310 | -0.251883 |
| H | 3.031957  | -1.282334 | 1.269589  | C                 | -1.031727 | -1.433463 | 0.076578  |
| H | 2.533893  | -2.969357 | 1.085440  | N                 | -1.278501 | -0.133048 | -0.501414 |
| H | 4.810919  | -3.482586 | 2.050017  | C                 | -0.545737 | 0.185252  | -1.736388 |
| H | 7.157585  | -4.032763 | 1.494099  | O                 | 2.651688  | -1.335952 | -0.748566 |
| H | 8.104421  | -3.369247 | -0.703931 | C                 | 3.403089  | -1.805802 | 0.353595  |
| H | 6.684627  | -2.154822 | -2.337383 | C                 | 4.759174  | -2.257688 | -0.123935 |
| H | 4.331592  | -1.604804 | -1.770994 | C                 | 5.376453  | -1.634087 | -1.209313 |
| H | -0.243850 | -2.790316 | -1.017791 | C                 | 6.645020  | -2.034136 | -1.619972 |
| H | -0.574593 | 0.619296  | 2.008597  | C                 | 7.311120  | -3.055828 | -0.946082 |
| H | 1.843355  | 0.615681  | 4.196974  | C                 | 6.699918  | -3.679106 | 0.139081  |
| H | 1.998205  | 0.386065  | 2.473539  | C                 | 5.427766  | -3.283954 | 0.544132  |
| H | 2.116427  | -1.842932 | 3.606576  | C                 | -1.064682 | -0.692117 | -2.875555 |
| H | 0.577487  | -1.535900 | 4.410647  | O                 | -2.363045 | -0.237074 | -3.200977 |
| H | 0.618679  | -1.758663 | 2.668350  | C                 | -3.286706 | -1.269376 | -3.506416 |
| H | -0.783095 | 3.155385  | 2.723306  | C                 | -3.904336 | -1.869381 | -2.262435 |
| H | 0.599278  | 3.073134  | 3.793608  | C                 | -3.909875 | -3.244190 | -2.031490 |
| H | 1.195257  | 4.014124  | 1.485769  | C                 | -4.522663 | -3.768714 | -0.895423 |
| H | 2.097879  | 2.544686  | 1.846519  | C                 | -5.138941 | -2.918875 | 0.020055  |
| H | 0.707940  | 2.469103  | 0.775724  | C                 | -5.130123 | -1.540463 | -0.200276 |
| H | -1.416339 | -0.300386 | 4.518390  | C                 | -4.510257 | -1.022655 | -1.332815 |
| H | -0.539750 | 0.966173  | 5.276998  | C                 | -2.222285 | 0.698779  | 0.033618  |





|    |           |           |           |                   |           |           |           |
|----|-----------|-----------|-----------|-------------------|-----------|-----------|-----------|
| C  | -0.230383 | -1.623509 | 0.285948  | H                 | 3.372030  | 3.188156  | -0.819346 |
| C  | 0.721548  | -2.246623 | -0.701531 | H                 | 4.735076  | 5.188257  | -0.269485 |
| C  | -0.468429 | 0.605827  | -1.990714 | H                 | 7.074701  | 4.918840  | 0.513864  |
| O  | -1.638116 | 1.236235  | -1.533698 | H                 | 8.038518  | 2.643676  | 0.752391  |
| C  | -2.716846 | 1.154484  | -2.458835 | H                 | 6.663518  | 0.651847  | 0.215393  |
| C  | -3.896008 | 1.857301  | -1.848348 | H                 | 2.917497  | -3.926409 | -0.684280 |
| C  | -4.683776 | 1.188436  | -0.910284 | H                 | 3.908447  | -3.785687 | -2.146382 |
| C  | -5.734475 | 1.849063  | -0.279862 | H                 | 3.843696  | -3.350106 | 1.490983  |
| C  | -5.993805 | 3.186911  | -0.573231 | H                 | 5.778388  | -2.623433 | 2.859074  |
| C  | -5.207875 | 3.860051  | -1.506281 | H                 | 7.847194  | -1.818481 | 1.752215  |
| C  | -4.162753 | 3.194680  | -2.143403 | H                 | 7.974904  | -1.739631 | -0.725198 |
| O  | 2.764252  | 0.817666  | -0.450256 | H                 | 6.021986  | -2.431675 | -2.088275 |
| C  | 4.133499  | 0.576355  | -0.731321 | H                 | 0.276855  | -2.216759 | -1.703330 |
| C  | 4.935784  | 1.796078  | -0.352822 | H                 | -3.500577 | -1.888208 | -0.255711 |
| C  | 6.248498  | 1.650035  | 0.097086  | H                 | -4.479237 | -1.432101 | 2.343636  |
| C  | 7.019131  | 2.769244  | 0.401142  | H                 | -5.437900 | -0.718480 | 1.085009  |
| C  | 6.478099  | 4.045848  | 0.269376  | H                 | -6.172853 | -3.756757 | -0.437799 |
| C  | 5.164244  | 4.196136  | -0.169615 | H                 | -4.925470 | -3.621138 | -1.649365 |
| C  | 4.397450  | 3.077104  | -0.482338 | H                 | -4.456837 | -4.589468 | 1.332075  |
| O  | -0.895405 | -2.313278 | 1.045639  | H                 | -3.024706 | -3.767112 | 1.832439  |
| C  | -1.111654 | 0.473644  | 1.142102  | H                 | -6.968225 | -2.276240 | -2.262313 |
| O  | -2.082127 | -0.024199 | 1.682270  | H                 | -6.738225 | -1.280858 | -0.821428 |
| O  | -0.704178 | 1.709952  | 1.294651  | H                 | -5.537279 | -1.257032 | -2.106911 |
| Li | -2.733708 | -1.819547 | 1.413891  | H                 | -6.830918 | -1.808418 | 2.879010  |
| C  | -3.658915 | -3.942449 | 0.938666  | H                 | -7.118150 | -2.551793 | 1.302720  |
| C  | -2.823386 | -4.747573 | -0.062272 | H                 | -6.104655 | -3.370408 | 2.486960  |
| B  | -4.393361 | -2.600796 | 0.293410  | H                 | -2.319800 | -5.609970 | 0.390121  |
| C  | -5.126727 | -1.696304 | 1.481220  | H                 | -3.449981 | -5.126123 | -0.875805 |
| C  | -6.360606 | -2.387503 | 2.075990  | H                 | -2.051023 | -4.114604 | -0.515954 |
| C  | -5.446275 | -3.048792 | -0.868325 | C                 | -1.477420 | 2.691991  | 2.080674  |
| C  | -6.216167 | -1.914322 | -1.550582 | C                 | -0.683168 | 3.971369  | 1.856455  |
| H  | 2.015201  | 0.017759  | -2.201097 | C                 | -2.886022 | 2.820988  | 1.518999  |
| H  | 2.510529  | -1.532077 | 0.280657  | C                 | -1.457213 | 2.281074  | 3.546966  |
| H  | 0.825748  | -3.294352 | -0.417507 | H                 | -1.142519 | 4.788789  | 2.417124  |
| H  | 0.619056  | 1.511997  | -0.404367 | H                 | 0.348550  | 3.848113  | 2.195502  |
| H  | 0.019526  | 1.192098  | -2.783946 | H                 | -0.679363 | 4.233121  | 0.795105  |
| H  | -0.701106 | -0.390101 | -2.400138 | H                 | -1.924000 | 3.072448  | 4.139628  |
| H  | -2.427038 | 1.624375  | -3.409735 | H                 | -2.010424 | 1.355068  | 3.707180  |
| H  | -2.950742 | 0.096835  | -2.650622 | H                 | -0.427688 | 2.154291  | 3.892792  |
| H  | -3.547200 | 3.716661  | -2.871648 | H                 | -3.365457 | 3.689068  | 1.980391  |
| H  | -5.410641 | 4.900560  | -1.739476 | H                 | -2.851679 | 2.974312  | 0.436519  |
| H  | -6.811306 | 3.702804  | -0.079463 | H                 | -3.489160 | 1.937455  | 1.728066  |
| H  | -6.347656 | 1.319265  | 0.443500  |                   |           |           |           |
| H  | -4.466464 | 0.149420  | -0.671166 |                   |           |           |           |
| H  | 4.499056  | -0.298887 | -0.177707 |                   |           |           |           |
| H  | 4.254942  | 0.351484  | -1.802867 |                   |           |           |           |
|    |           |           |           | glu_si_TS_solvent |           |           |           |
|    |           |           |           | C                 | -3.787966 | 1.916979  | 0.785003  |
|    |           |           |           | C                 | -4.347749 | 0.736672  | 1.269689  |



|    |           |           |           |   |           |           |           |
|----|-----------|-----------|-----------|---|-----------|-----------|-----------|
| C  | -5.728901 | 0.668268  | 1.476162  | H | -2.854555 | 0.135022  | -0.941593 |
| C  | -6.543946 | 1.754293  | 1.179181  | H | -1.254401 | 1.573013  | -1.945022 |
| C  | -5.983583 | 2.929153  | 0.675827  | H | 0.083183  | -1.487457 | 1.592356  |
| C  | -4.608194 | 3.006502  | 0.485469  | H | 0.274578  | -2.985115 | -0.305034 |
| C  | -3.511991 | -0.485179 | 1.587550  | H | 0.536303  | -1.645953 | -1.434710 |
| O  | -2.120129 | -0.287892 | 1.398033  | H | 2.701004  | -3.774342 | -0.767945 |
| C  | -1.550353 | -1.001604 | 0.319156  | H | 2.542763  | -2.494288 | -1.986713 |
| C  | -1.860771 | -0.320569 | -1.025989 | H | 5.049864  | -4.157668 | -1.591362 |
| C  | -0.810237 | 0.750729  | -1.383041 | H | 7.423370  | -3.489831 | -1.394040 |
| C  | -0.118043 | 1.338877  | -0.166622 | H | 8.020775  | -1.274131 | -0.448103 |
| N  | 0.490907  | 0.306621  | 0.652390  | H | 6.219112  | 0.268869  | 0.306097  |
| C  | -0.049911 | -1.065763 | 0.595933  | H | 3.840627  | -0.415544 | 0.098978  |
| O  | -1.854434 | -1.290842 | -2.064723 | H | -3.868475 | -1.332038 | 0.981531  |
| C  | -3.111620 | -1.465969 | -2.701927 | H | -3.659891 | -0.757420 | 2.639982  |
| C  | -4.154771 | -2.050096 | -1.776863 | H | -2.712387 | 1.990892  | 0.652297  |
| C  | -5.320645 | -1.350908 | -1.471579 | H | -4.162739 | 3.920523  | 0.104164  |
| C  | -6.261603 | -1.892822 | -0.594997 | H | -6.617171 | 3.778310  | 0.440247  |
| C  | -6.029583 | -3.129720 | -0.002486 | H | -7.615548 | 1.686710  | 1.340352  |
| C  | -4.858321 | -3.832263 | -0.295410 | H | -6.165212 | -0.249047 | 1.865785  |
| C  | -3.930314 | -3.296285 | -1.180498 | H | -3.466687 | -0.509404 | -3.109811 |
| C  | 0.685053  | -1.966371 | -0.394406 | H | -2.917571 | -2.142686 | -3.538944 |
| O  | 2.050135  | -1.937920 | -0.063723 | H | -5.491546 | -0.371233 | -1.911788 |
| C  | 2.845928  | -2.697597 | -0.946357 | H | -7.164955 | -1.336878 | -0.365352 |
| C  | 4.294104  | -2.319155 | -0.766162 | H | -6.756526 | -3.548790 | 0.685910  |
| C  | 4.634920  | -1.078546 | -0.228921 | H | -4.675230 | -4.798021 | 0.164872  |
| C  | 5.970898  | -0.702283 | -0.113452 | H | -3.014864 | -3.836392 | -1.410279 |
| C  | 6.979088  | -1.565667 | -0.535774 | H | -0.062109 | 0.274561  | -2.019894 |
| C  | 6.643193  | -2.808898 | -1.068544 | H | 1.192076  | 1.794621  | -0.909987 |
| C  | 5.307185  | -3.184514 | -1.179906 | H | 3.391653  | 3.265329  | 0.057261  |
| C  | 1.369331  | 0.694286  | 1.627437  | H | 3.711637  | 1.637455  | -0.474867 |
| O  | 1.689074  | -0.286668 | 2.457030  | H | 2.654519  | 2.251476  | -3.780723 |
| C  | 2.606206  | -0.072647 | 3.580717  | H | 1.070586  | 1.594595  | -3.466941 |
| C  | 2.038844  | 0.980608  | 4.525988  | H | 2.012369  | 4.596557  | -2.440397 |
| O  | -0.521166 | 2.396141  | 0.376058  | H | 1.278755  | 4.652583  | -0.891122 |
| O  | 1.824541  | 1.835566  | 1.703229  | H | 2.584340  | -0.339107 | -3.697344 |
| C  | 2.621170  | -1.443557 | 4.245297  | H | 3.753480  | 0.378555  | -2.582541 |
| C  | 3.994815  | 0.285463  | 3.064944  | H | 2.219883  | -0.194423 | -1.964556 |
| Li | 1.202872  | 3.177105  | 0.505254  | H | 5.518462  | 3.229972  | -1.191646 |
| C  | 1.301604  | 4.036401  | -1.812623 | H | 4.724722  | 2.509604  | -2.595128 |
| B  | 2.009193  | 2.566382  | -1.658237 | H | 4.339268  | 4.161380  | -2.119411 |
| C  | 2.070956  | 1.702830  | -3.024647 | H | -0.372885 | 5.132908  | -2.718952 |
| C  | 2.685855  | 0.313252  | -2.821692 | H | -0.115008 | 3.517442  | -3.381925 |
| C  | -0.084959 | 4.108055  | -2.460496 | H | -0.848457 | 3.712885  | -1.783637 |
| C  | 3.428395  | 2.631216  | -0.846301 | H | 3.309320  | -1.436394 | 5.093959  |
| C  | 4.566846  | 3.162576  | -1.730509 | H | 1.622593  | -1.705971 | 4.604692  |
| H  | -1.945245 | -2.026293 | 0.279915  | H | 2.949678  | -2.202112 | 3.530057  |

|                        |           |           |           |   |           |           |           |
|------------------------|-----------|-----------|-----------|---|-----------|-----------|-----------|
| H                      | 2.630005  | 0.984742  | 5.445844  | C | 0.362741  | 1.255129  | 2.682434  |
| H                      | 2.071796  | 1.975022  | 4.081631  | C | -0.974697 | 3.205460  | 1.849893  |
| H                      | 1.004664  | 0.734868  | 4.783291  | C | -3.285706 | -3.108873 | 2.823796  |
| H                      | 4.672413  | 0.384397  | 3.917804  | C | -2.661405 | -4.477879 | 2.537904  |
| H                      | 4.372209  | -0.509382 | 2.416565  | B | -3.721252 | -2.206637 | 1.591877  |
| H                      | 3.984758  | 1.226501  | 2.512739  | C | -4.526984 | -0.879305 | 1.887260  |
| glu_si_product_solvent |           |           |           | C | -6.032227 | -1.105580 | 1.648673  |
| C                      | -5.657576 | 1.517784  | -2.714395 | C | -3.615341 | -2.760975 | 0.115213  |
| C                      | -4.423469 | 1.501018  | -2.061069 | C | -3.743576 | -1.739434 | -1.018051 |
| C                      | -4.364832 | 1.804933  | -0.701444 | H | 1.765487  | 0.767043  | -2.726538 |
| C                      | -5.532555 | 2.113292  | -0.004285 | H | 2.363915  | -1.291746 | -0.649356 |
| C                      | -6.762022 | 2.124299  | -0.656219 | H | 1.186600  | -3.035155 | -2.083274 |
| C                      | -6.821261 | 1.827121  | -2.017518 | H | 0.035149  | 1.494389  | -0.820569 |
| C                      | -3.178920 | 1.120788  | -2.827075 | H | -0.483221 | 1.358315  | -3.270733 |
| O                      | -2.075544 | 1.154780  | -1.957791 | H | -1.068393 | -0.304157 | -3.003981 |
| C                      | -0.881117 | 0.662641  | -2.515762 | H | -3.024936 | 1.807636  | -3.675296 |
| C                      | 0.098053  | 0.542360  | -1.346681 | H | -3.301380 | 0.108105  | -3.245798 |
| C                      | 1.580187  | 0.380050  | -1.710031 | H | -5.707963 | 1.278906  | -3.774389 |
| C                      | 2.034289  | -1.080471 | -1.675433 | H | -7.775249 | 1.832071  | -2.535449 |
| C                      | 0.862011  | -1.997667 | -1.982680 | H | -7.669309 | 2.360720  | -0.109435 |
| C                      | -0.087086 | -1.992163 | -0.769489 | H | -5.478602 | 2.335605  | 1.058162  |
| N                      | -0.330636 | -0.505329 | -0.417055 | H | -3.405297 | 1.774959  | -0.192650 |
| O                      | 2.264570  | 1.180303  | -0.759386 | H | 4.109314  | 0.223246  | -0.651791 |
| C                      | 3.672583  | 1.201125  | -0.892605 | H | 3.941556  | 1.422821  | -1.938184 |
| C                      | 4.229714  | 2.251943  | 0.034013  | H | 2.543549  | 3.563097  | -0.154419 |
| C                      | 3.522100  | 3.426827  | 0.294988  | H | 3.501592  | 5.310388  | 1.330443  |
| C                      | 4.061298  | 4.402009  | 1.129589  | H | 5.735509  | 4.975579  | 2.358063  |
| C                      | 5.316017  | 4.215310  | 1.706856  | H | 6.999303  | 2.888353  | 1.904013  |
| C                      | 6.025456  | 3.044586  | 1.450393  | H | 6.024724  | 1.142258  | 0.435824  |
| C                      | 5.481298  | 2.065941  | 0.622527  | H | 3.265710  | -3.277087 | -2.361534 |
| O                      | 3.112387  | -1.215415 | -2.591418 | H | 4.531915  | -2.454292 | -3.290022 |
| C                      | 3.901438  | -2.383140 | -2.399691 | H | 3.297151  | -3.242002 | 0.117145  |
| C                      | 4.758836  | -2.308512 | -1.157903 | H | 4.664580  | -3.002705 | 2.172907  |
| C                      | 4.282617  | -2.781515 | 0.068097  | H | 6.893061  | -1.918414 | 2.064950  |
| C                      | 5.046264  | -2.637280 | 1.224724  | H | 7.763934  | -1.097415 | -0.110928 |
| C                      | 6.297047  | -2.027754 | 1.164388  | H | 6.390589  | -1.331781 | -2.160902 |
| C                      | 6.785307  | -1.564866 | -0.057249 | H | 0.387812  | -1.708332 | -2.926432 |
| C                      | 6.016508  | -1.702282 | -1.209604 | H | -1.085126 | -2.352868 | -1.084329 |
| O                      | 0.443542  | -2.680348 | 0.252678  | H | -4.378437 | -0.532146 | 2.917338  |
| Li                     | -0.402227 | -2.570979 | 1.785235  | H | -4.180037 | -0.077877 | 1.222641  |
| C                      | -1.016546 | -0.203008 | 0.690825  | H | -4.424625 | -3.508531 | 0.031837  |
| O                      | -1.429966 | -1.043036 | 1.517686  | H | -2.694925 | -3.349602 | -0.002745 |
| O                      | -1.250134 | 1.109704  | 0.867311  | H | -4.186658 | -3.246044 | 3.442258  |
| C                      | -0.999480 | 1.716663  | 2.173311  | H | -2.627469 | -2.498213 | 3.461062  |
| C                      | -2.129202 | 1.392281  | 3.140873  | H | -3.639273 | -2.206821 | -2.004148 |
|                        |           |           |           | H | -4.711695 | -1.227926 | -0.993343 |

|   |           |           |           |
|---|-----------|-----------|-----------|
| H | -2.979941 | -0.956279 | -0.939012 |
| H | -6.610163 | -0.194767 | 1.833852  |
| H | -6.233461 | -1.413720 | 0.617620  |
| H | -6.427917 | -1.886995 | 2.307279  |
| H | -2.384609 | -5.011168 | 3.452188  |
| H | -3.356239 | -5.114052 | 1.980825  |
| H | -1.761445 | -4.415353 | 1.911771  |
| H | -0.821105 | 3.783865  | 2.764524  |
| H | -0.163410 | 3.429569  | 1.151547  |
| H | -1.922930 | 3.509166  | 1.397392  |
| H | 0.635583  | 1.828223  | 3.572359  |
| H | 0.343680  | 0.195564  | 2.952139  |
| H | 1.125764  | 1.415285  | 1.913127  |
| H | -1.986257 | 1.955671  | 4.067998  |
| H | -3.089445 | 1.679460  | 2.701401  |
| H | -2.156981 | 0.325543  | 3.364788  |

## 2-deoxygalactonolactam-*N*-Boc (20b)

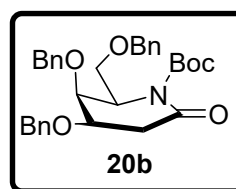

### gal\_re\_reactant\_gas\_conformation1

|   |           |           |           |
|---|-----------|-----------|-----------|
| C | -3.959991 | -5.515810 | -0.796710 |
| C | -2.806106 | -6.196408 | -0.401012 |
| C | -2.828714 | -6.953171 | 0.766728  |
| C | -3.990783 | -7.037351 | 1.531210  |
| C | -5.135242 | -6.352807 | 1.135996  |
| C | -5.117527 | -5.589298 | -0.031318 |
| C | -1.553526 | -6.082325 | -1.228223 |
| O | -1.295764 | -4.702372 | -1.419971 |
| C | -0.266082 | -4.390654 | -2.314197 |
| C | -0.282569 | -2.868107 | -2.459085 |
| C | 0.957954  | -2.390645 | -3.258036 |
| N | 1.749919  | -3.517131 | -3.806513 |
| C | 2.132981  | -4.530559 | -2.929868 |
| C | 1.129100  | -4.798761 | -1.832615 |
| O | -0.230951 | -2.234241 | -1.196026 |
| C | -1.449370 | -2.110929 | -0.474151 |
| C | -1.462865 | -2.930378 | 0.795434  |
| C | -0.279363 | -3.339549 | 1.404825  |
| C | -0.314601 | -4.086122 | 2.580077  |
| C | -1.534449 | -4.419495 | 3.161942  |
| C | -2.720197 | -3.999511 | 2.563883  |
| C | -2.682059 | -3.261144 | 1.385739  |
| C | 1.909920  | -1.520279 | -2.421418 |
| O | 3.066092  | -1.332527 | -3.198295 |
| C | 4.187132  | -0.817334 | -2.503264 |
| C | 5.424791  | -1.495077 | -3.033811 |
| C | 5.564314  | -2.874737 | -2.857620 |
| C | 6.677224  | -3.540179 | -3.358361 |
| C | 7.661066  | -2.830488 | -4.048784 |
| C | 7.525315  | -1.457859 | -4.231455 |
| C | 6.408531  | -0.793082 | -3.725056 |
| C | 2.300899  | -3.279410 | -5.084942 |
| O | 3.142132  | -4.247635 | -5.478442 |
| C | 4.012069  | -4.016365 | -6.660419 |
| C | 3.173223  | -4.066543 | -7.929150 |
| O | 3.141844  | -5.209173 | -3.063978 |
| O | 1.978750  | -2.335188 | -5.755529 |

|    |           |           |           |                             |           |            |           |
|----|-----------|-----------|-----------|-----------------------------|-----------|------------|-----------|
| C  | 4.763343  | -2.699594 | -6.502875 | H                           | 2.359737  | -6.732151  | -6.748832 |
| C  | 4.987234  | -5.184923 | -6.574530 | H                           | 1.205067  | -7.979638  | -7.049075 |
| Li | 2.813267  | -6.111766 | -4.783725 | H                           | 0.347042  | -5.777606  | -7.925256 |
| C  | 2.611178  | -8.325794 | -4.352051 | H                           | -0.684077 | -6.349859  | -6.610024 |
| B  | 1.243871  | -7.516345 | -4.848175 | H                           | 0.491871  | -5.076035  | -6.309048 |
| C  | -0.108028 | -8.361687 | -4.525494 | H                           | 3.591116  | -7.811992  | -4.496978 |
| C  | -0.155194 | -8.925276 | -3.101421 | H                           | 2.575334  | -8.494946  | -3.266768 |
| C  | 2.756487  | -9.673917 | -5.069987 | H                           | 3.624231  | -10.249840 | -4.730766 |
| C  | 1.350791  | -7.077724 | -6.438234 | H                           | 1.865854  | -10.289691 | -4.907983 |
| C  | 0.329366  | -6.016573 | -6.855302 | H                           | 2.854529  | -9.533796  | -6.152231 |
| H  | -1.201159 | -2.568390 | -2.980013 | H                           | -1.558499 | -1.046637  | -0.226287 |
| H  | -0.447452 | -4.862063 | -3.295044 | H                           | -2.300068 | -2.402871  | -1.099952 |
| H  | 1.214318  | -5.866342 | -1.619162 | H                           | -3.611483 | -2.961705  | 0.907512  |
| H  | 0.646069  | -1.816278 | -4.127632 | H                           | -3.677547 | -4.268942  | 2.998646  |
| H  | 1.418436  | -0.574467 | -2.162601 | H                           | -1.561458 | -5.006621  | 4.074418  |
| H  | 2.159263  | -2.032048 | -1.479520 | H                           | 0.613851  | -4.406464  | 3.043207  |
| H  | 4.248526  | 0.271760  | -2.629870 | H                           | 0.669016  | -3.068654  | 0.950822  |
| H  | 4.084601  | -1.024610 | -1.427725 |                             |           |            |           |
| H  | 4.791245  | -3.431836 | -2.335263 | gal_re_TS_gas_conformation1 |           |            |           |
| H  | 6.777431  | -4.611018 | -3.207641 | C                           | -0.431212 | -3.745002  | 1.228621  |
| H  | 8.530695  | -3.347794 | -4.441687 | C                           | -1.545169 | -3.087429  | 0.713942  |
| H  | 8.286250  | -0.903219 | -4.771089 | C                           | -2.769637 | -3.208843  | 1.373176  |
| H  | 6.296950  | 0.277360  | -3.876219 | C                           | -2.882956 | -3.984085  | 2.521227  |
| H  | -1.670937 | -6.574219 | -2.207092 | C                           | -1.767832 | -4.650189  | 3.025017  |
| H  | -0.718052 | -6.570103 | -0.708304 | C                           | -0.543132 | -4.528155  | 2.375864  |
| H  | -1.928235 | -7.469512 | 1.088145  | C                           | -1.456368 | -2.228283  | -0.527525 |
| H  | -3.996198 | -7.628753 | 2.441437  | C                           | -0.327062 | -2.957505  | -2.543278 |
| H  | -6.040076 | -6.412230 | 1.732856  | C                           | 0.952017  | -2.524653  | -3.301286 |
| H  | -6.009289 | -5.054761 | -0.344193 | N                           | 1.578151  | -3.660386  | -4.003932 |
| H  | -3.935635 | -4.915706 | -1.702190 | C                           | 1.970722  | -4.790983  | -3.163784 |
| H  | 5.534763  | -2.653461 | -7.277066 | C                           | 0.932657  | -5.036557  | -2.073230 |
| H  | 4.103425  | -1.840268 | -6.613705 | C                           | -0.425996 | -4.488003  | -2.494672 |
| H  | 5.254849  | -2.655785 | -5.527929 | C                           | 1.998400  | -1.868294  | -2.384923 |
| H  | 3.839238  | -3.971071 | -8.791833 | O                           | 3.167806  | -1.707309  | -3.151203 |
| H  | 2.641089  | -5.017718 | -8.007197 | C                           | 4.279559  | -1.252773  | -2.405390 |
| H  | 2.452883  | -3.248265 | -7.948157 | C                           | 5.535586  | -1.753104  | -3.069466 |
| H  | 5.706133  | -5.120182 | -7.394820 | C                           | 5.810041  | -3.124261  | -3.038605 |
| H  | 5.535069  | -5.147983 | -5.627685 | C                           | 6.944114  | -3.623833  | -3.669974 |
| H  | 4.473295  | -6.148514 | -6.666643 | C                           | 7.805872  | -2.761643  | -4.349976 |
| H  | 1.377178  | -4.241249 | -0.922126 | C                           | 7.532314  | -1.398232  | -4.387502 |
| H  | 1.134236  | -6.452336 | -4.184300 | C                           | 6.400104  | -0.896495  | -3.745439 |
| H  | -0.229107 | -9.192219 | -5.237733 | O                           | -1.490898 | -4.754082  | -1.615243 |
| H  | -0.989700 | -7.721841 | -4.682720 | C                           | -1.625513 | -6.072990  | -1.131746 |
| H  | -1.139506 | -9.319005 | -2.820887 | C                           | -2.909555 | -6.160793  | -0.347724 |
| H  | 0.568565  | -9.737530 | -2.971514 | C                           | -2.977667 | -6.946863  | 0.799683  |
| H  | 0.115009  | -8.153797 | -2.367847 | C                           | -4.165688 | -7.046669  | 1.519581  |



|    |           |           |           |                                   |           |           |           |
|----|-----------|-----------|-----------|-----------------------------------|-----------|-----------|-----------|
| C  | 5.751538  | 1.688465  | -0.827146 | H                                 | 1.046360  | -0.519095 | 0.630388  |
| C  | 7.126357  | 1.652709  | -1.033507 | H                                 | -0.768468 | 1.860802  | 1.007708  |
| C  | 7.976548  | 1.219529  | -0.017601 | H                                 | -0.618061 | -1.430019 | 4.234539  |
| C  | 7.443223  | 0.821030  | 1.204205  | H                                 | 0.516169  | -0.701260 | 3.125918  |
| C  | 6.065505  | 0.846850  | 1.404780  | H                                 | 0.637798  | -3.148889 | 2.797128  |
| C  | -0.776521 | -1.239004 | -1.696682 | H                                 | -1.112737 | -3.255394 | 2.615129  |
| O  | -2.192516 | -1.224554 | -1.510379 | H                                 | -0.150003 | -2.457295 | 1.373042  |
| C  | -2.814754 | -2.489615 | -1.701719 | H                                 | -2.408218 | 1.782119  | 2.678668  |
| C  | -4.231858 | -2.355241 | -1.200176 | H                                 | -2.505010 | 0.915341  | 4.193244  |
| C  | -4.798621 | -3.321734 | -0.367843 | H                                 | -0.817393 | 2.734325  | 4.369968  |
| C  | -6.103607 | -3.172184 | 0.094400  | H                                 | -0.038485 | 1.159561  | 4.543226  |
| C  | -6.846136 | -2.049188 | -0.262618 | H                                 | 0.108234  | 2.052520  | 3.037480  |
| C  | -6.279346 | -1.070872 | -1.076432 | H                                 | -2.994651 | -2.027493 | 1.777685  |
| C  | -4.976013 | -1.219439 | -1.545145 | H                                 | -3.253712 | -1.661602 | 3.444455  |
| C  | -2.089333 | 1.739175  | -1.277152 | H                                 | -5.203634 | -0.914924 | 1.902256  |
| O  | -2.725889 | 2.235442  | -0.196140 | H                                 | -4.552539 | 0.336645  | 2.975882  |
| O  | -1.359666 | -0.101012 | 1.030056  | H                                 | -4.151242 | 0.379840  | 1.298628  |
| O  | -2.495020 | 1.831495  | -2.420991 | H                                 | 3.061798  | -1.907475 | -3.095496 |
| Li | -2.859581 | -0.657794 | 0.243294  | H                                 | 3.485084  | -0.224380 | -2.722186 |
| C  | -3.069244 | -1.169950 | 2.481205  | H                                 | 5.782425  | -1.225571 | -2.342047 |
| B  | -1.639438 | -0.335029 | 2.554939  | H                                 | 7.331373  | -2.000575 | -0.583345 |
| C  | -1.846178 | 1.090025  | 3.328007  | H                                 | 6.441077  | -2.828415 | 1.583644  |
| C  | -0.589244 | 1.799016  | 3.845711  | H                                 | 3.985798  | -2.888007 | 1.960155  |
| C  | -4.311065 | -0.323481 | 2.137496  | H                                 | 2.438289  | -2.128295 | 0.178814  |
| C  | -0.436876 | -1.251708 | 3.163389  | C                                 | -3.829085 | 3.175965  | -0.362661 |
| C  | -0.248309 | -2.598855 | 2.458943  | C                                 | -4.150439 | 3.579069  | 1.071420  |
| H  | 1.584048  | 0.874104  | -2.758194 | C                                 | -3.368091 | 4.386046  | -1.169595 |
| H  | 1.396606  | 2.186025  | -0.745796 | C                                 | -5.024695 | 2.477892  | -1.003890 |
| H  | 1.313763  | 0.965659  | 1.534317  | H                                 | -4.962990 | 4.310537  | 1.076470  |
| H  | -0.700685 | 0.549833  | -2.866179 | H                                 | -4.455994 | 2.708150  | 1.657795  |
| H  | -0.525405 | -1.828172 | -2.584605 | H                                 | -3.272333 | 4.022337  | 1.548222  |
| H  | -0.305677 | -1.700376 | -0.822972 | H                                 | -4.159618 | 5.140732  | -1.167778 |
| H  | -2.784376 | -2.750991 | -2.768216 | H                                 | -2.477867 | 4.824255  | -0.708930 |
| H  | -2.277816 | -3.266620 | -1.138856 | H                                 | -3.142840 | 4.111929  | -2.200203 |
| H  | -4.213986 | -4.190420 | -0.077055 | H                                 | -5.888318 | 3.149278  | -0.982883 |
| H  | -6.535151 | -3.927008 | 0.743363  | H                                 | -4.809975 | 2.203534  | -2.037159 |
| H  | -7.860984 | -1.931416 | 0.102878  | H                                 | -5.280205 | 1.579127  | -0.432339 |
| H  | -6.851535 | -0.190068 | -1.350505 |                                   |           |           |           |
| H  | -4.524746 | -0.456374 | -2.176966 |                                   |           |           |           |
| H  | 3.404602  | 2.309211  | 0.978056  |                                   |           |           |           |
| H  | 3.466010  | 0.581196  | 1.404109  |                                   |           |           |           |
| H  | 5.648006  | 0.502156  | 2.347467  |                                   |           |           |           |
| H  | 8.097915  | 0.473794  | 1.997575  |                                   |           |           |           |
| H  | 9.049613  | 1.192146  | -0.179431 |                                   |           |           |           |
| H  | 7.537153  | 1.965171  | -1.988890 |                                   |           |           |           |
| H  | 5.080951  | 2.011410  | -1.617265 |                                   |           |           |           |
|    |           |           |           | gal_re_reactant_gas_conformation2 |           |           |           |
|    |           |           |           | C                                 | 4.305803  | 1.680273  | 0.424495  |
|    |           |           |           | C                                 | 4.243918  | 1.516540  | -0.959910 |
|    |           |           |           | C                                 | 5.423173  | 1.290404  | -1.671564 |
|    |           |           |           | C                                 | 6.647841  | 1.227340  | -1.013037 |
|    |           |           |           | C                                 | 6.701534  | 1.399772  | 0.369019  |
|    |           |           |           | C                                 | 5.528928  | 1.623762  | 1.086544  |
|    |           |           |           | C                                 | 2.922009  | 1.564130  | -1.680735 |

|    |           |           |           |   |           |           |           |
|----|-----------|-----------|-----------|---|-----------|-----------|-----------|
| O  | 2.382044  | 0.247189  | -1.833121 | H | 3.049827  | 1.995747  | -2.681284 |
| C  | 1.042668  | 0.126905  | -1.422418 | H | 2.217487  | 2.199378  | -1.129388 |
| C  | 0.403586  | -1.101107 | -2.059167 | H | 3.393816  | 1.872986  | 0.984722  |
| C  | -1.114543 | -1.058515 | -1.771645 | H | 5.565504  | 1.762882  | 2.162365  |
| N  | -1.455941 | -0.279052 | -0.553680 | H | 7.656422  | 1.363360  | 0.884442  |
| C  | -0.536164 | -0.135148 | 0.501283  | H | 7.559829  | 1.056204  | -1.576428 |
| C  | 0.907681  | -0.024257 | 0.087361  | H | 5.377935  | 1.169246  | -2.751444 |
| C  | -1.681084 | -2.471976 | -1.614645 | H | 1.475348  | -0.890325 | 0.440289  |
| O  | -3.062999 | -2.414304 | -1.334194 | H | -0.909712 | 2.409125  | 0.480540  |
| C  | -3.473610 | -3.403062 | -0.394338 | H | 1.226432  | 4.504390  | 1.764338  |
| C  | -3.033532 | -3.065125 | 1.010293  | H | 1.539639  | 3.164228  | 0.700691  |
| C  | -3.693158 | -2.050854 | 1.708031  | H | 2.340087  | 2.558863  | 2.973894  |
| C  | -3.279321 | -1.682035 | 2.982227  | H | 0.790895  | 2.999221  | 3.676337  |
| C  | -2.192361 | -2.321313 | 3.574169  | H | 0.905392  | 1.571537  | 2.658128  |
| C  | -1.526408 | -3.332606 | 2.888444  | H | -2.027330 | 4.601567  | -0.336710 |
| C  | -1.948964 | -3.704281 | 1.613839  | H | -0.873074 | 5.647300  | 0.469518  |
| O  | -0.881326 | 0.006178  | 1.661211  | H | -0.316762 | 5.323633  | -1.992278 |
| C  | -2.717167 | 0.316354  | -0.463025 | H | 0.977875  | 4.734388  | -0.946480 |
| O  | -3.169020 | 0.822232  | 0.553204  | H | -0.139015 | 3.589633  | -1.692184 |
| O  | -3.316493 | 0.335064  | -1.635585 | H | -1.517981 | 2.879960  | 3.230962  |
| C  | -4.664639 | 0.886635  | -1.797830 | H | -1.242159 | 4.548793  | 2.959199  |
| C  | -5.638468 | 0.155506  | -0.880681 | H | -3.707382 | 4.057285  | 3.128870  |
| C  | -4.629693 | 2.390959  | -1.558904 | H | -3.289394 | 4.757807  | 1.558062  |
| C  | -4.962996 | 0.562860  | -3.256294 | H | -3.628912 | 3.047163  | 1.685247  |
| Li | -1.896386 | 1.651807  | 1.751668  | H | -5.960547 | 0.921540  | -3.520861 |
| C  | -1.641195 | 3.662488  | 2.448709  | H | -4.233138 | 1.046102  | -3.910949 |
| B  | -0.667744 | 3.485933  | 1.101200  | H | -4.917902 | -0.518038 | -3.413692 |
| C  | -0.982490 | 4.652785  | 0.006882  | H | -5.610977 | 2.813008  | -1.793964 |
| C  | -0.071926 | 4.582013  | -1.222498 | H | -4.384183 | 2.625244  | -0.522445 |
| C  | -3.143697 | 3.888378  | 2.204694  | H | -3.887003 | 2.859307  | -2.210661 |
| C  | 0.909326  | 3.470369  | 1.552126  | H | -6.661017 | 0.416695  | -1.166413 |
| C  | 1.262015  | 2.604877  | 2.769042  | H | -5.507993 | -0.924663 | -1.000881 |
| H  | 0.555466  | -1.074065 | -3.147604 | H | -5.486121 | 0.427880  | 0.163797  |
| O  | 0.904317  | -2.314404 | -1.540745 | C | 2.240523  | -2.668835 | -1.897856 |
| H  | 0.466673  | 1.008701  | -1.749814 | H | 2.189968  | -3.690587 | -2.294006 |
| H  | 1.273476  | 0.864246  | 0.613851  | H | 2.619458  | -2.007404 | -2.682668 |
| H  | -1.599181 | -0.552395 | -2.604533 | C | 3.146831  | -2.625896 | -0.692323 |
| H  | -1.494408 | -3.043418 | -2.534759 | C | 4.357920  | -1.940943 | -0.725850 |
| H  | -1.137205 | -2.957709 | -0.800219 | C | 5.179412  | -1.903842 | 0.398605  |
| H  | -4.565546 | -3.425187 | -0.457101 | C | 4.786100  | -2.544933 | 1.568847  |
| H  | -3.095561 | -4.391133 | -0.692781 | C | 3.571943  | -3.229315 | 1.611529  |
| H  | -1.437107 | -4.505446 | 1.084900  | C | 2.759252  | -3.273558 | 0.484210  |
| H  | -0.679166 | -3.833611 | 3.345801  | H | 4.648017  | -1.409206 | -1.626897 |
| H  | -1.863768 | -2.029165 | 4.566216  | H | 6.112128  | -1.350649 | 0.360661  |
| H  | -3.803330 | -0.892821 | 3.513042  | H | 5.419132  | -2.507962 | 2.449756  |
| H  | -4.537125 | -1.547329 | 1.243745  | H | 3.259879  | -3.727660 | 2.524167  |

|                             |           |           |           |   |           |           |           |
|-----------------------------|-----------|-----------|-----------|---|-----------|-----------|-----------|
| H                           | 1.805329  | -3.794504 | 0.515702  | H | 6.223437  | -2.188928 | -1.742658 |
|                             |           |           |           | H | 6.767642  | -2.191988 | 0.728633  |
| gal_re_TS_gas_conformation2 |           |           |           | H | 5.106958  | -2.754087 | 1.028601  |
| C                           | 1.525469  | 3.393088  | -0.538915 | H | 6.856539  | -5.820336 | 0.733829  |
| C                           | 2.585085  | 3.212912  | -1.429817 | H | 6.529865  | -4.564522 | 1.942470  |
| C                           | 3.388515  | 4.300838  | -1.763872 | H | 4.369986  | -4.537998 | 3.006030  |
| C                           | 3.133104  | 5.559937  | -1.223446 | H | 2.036300  | -5.349543 | 3.155071  |
| C                           | 2.068818  | 5.734240  | -0.344406 | H | 1.108780  | -6.801980 | 1.372086  |
| C                           | 1.264562  | 4.647294  | -0.001813 | H | 2.534840  | -7.446577 | -0.562756 |
| C                           | 2.877443  | 1.837114  | -1.962731 | H | 4.857555  | -6.601975 | -0.716128 |
| O                           | 3.373959  | 1.063752  | -0.883790 | H | 3.617687  | 1.887007  | -2.776127 |
| C                           | 3.665546  | -0.278523 | -1.200823 | H | 1.965172  | 1.373269  | -2.366524 |
| C                           | 5.127355  | -0.554116 | -0.839426 | H | 0.917124  | 2.536881  | -0.259646 |
| C                           | 5.443822  | -2.064965 | -0.993812 | H | 0.441779  | 4.777613  | 0.694065  |
| N                           | 4.279423  | -2.827473 | -1.486075 | H | 1.865765  | 6.714792  | 0.075329  |
| C                           | 3.027681  | -2.660321 | -0.757396 | H | 3.761363  | 6.403321  | -1.492323 |
| C                           | 2.789485  | -1.212631 | -0.387269 | H | 4.218605  | 4.161836  | -2.452179 |
| C                           | 5.924856  | -2.740889 | 0.293572  | H | 3.029643  | -1.095086 | 0.676345  |
| O                           | 6.313154  | -4.054988 | -0.060042 | H | 2.108369  | -2.702085 | -2.153975 |
| C                           | 6.182557  | -4.997890 | 0.993816  | H | -0.430387 | -1.256826 | -3.532723 |
| C                           | 4.767007  | -5.511132 | 1.131767  | H | 0.878383  | -0.587199 | -2.600809 |
| C                           | 4.236627  | -6.328483 | 0.131783  | H | -1.106931 | -0.546223 | -1.153421 |
| C                           | 2.926221  | -6.790391 | 0.211556  | H | -1.503038 | -2.215359 | -1.549843 |
| C                           | 2.128791  | -6.436555 | 1.301493  | H | -0.119573 | -1.877135 | -0.531652 |
| C                           | 2.651433  | -5.627699 | 2.305697  | H | 2.253464  | -3.818517 | -4.627363 |
| C                           | 3.964167  | -5.169965 | 2.219273  | H | 0.956852  | -2.791212 | -5.204146 |
| O                           | 2.529572  | -3.586753 | -0.101952 | H | 3.133125  | -1.721481 | -5.752946 |
| C                           | 4.457489  | -3.901193 | -2.314146 | H | 2.348960  | -0.749963 | -4.504377 |
| O                           | 3.622764  | -4.790323 | -2.468689 | H | 3.656758  | -1.857511 | -4.072440 |
| O                           | 5.595155  | -3.831702 | -2.992157 | H | 0.033302  | -4.319264 | -1.527218 |
| C                           | 5.992425  | -4.881974 | -3.925734 | H | -0.820415 | -3.916740 | -2.952654 |
| C                           | 6.126684  | -6.209797 | -3.188168 | H | -0.139681 | -6.311896 | -3.018050 |
| C                           | 5.007280  | -4.951765 | -5.087064 | H | 0.500789  | -5.386721 | -4.382259 |
| C                           | 7.356533  | -4.391954 | -4.397509 | H | 1.570141  | -5.872482 | -3.106633 |
| Li                          | 2.006789  | -4.658730 | -1.511060 | H | 7.773048  | -5.093927 | -5.123828 |
| C                           | 0.193024  | -4.169329 | -2.615672 | H | 7.263423  | -3.411210 | -4.870822 |
| B                           | 1.080762  | -2.810623 | -2.973980 | H | 8.042740  | -4.311189 | -3.550316 |
| C                           | 1.757958  | -2.853499 | -4.449634 | H | 5.415325  | -5.606776 | -5.862492 |
| C                           | 2.774314  | -1.739140 | -4.716715 | H | 4.042307  | -5.343415 | -4.764687 |
| C                           | 0.549343  | -5.507475 | -3.296764 | H | 4.858395  | -3.956399 | -5.516184 |
| C                           | 0.215147  | -1.464538 | -2.664290 | H | 6.661880  | -6.922580 | -3.821823 |
| C                           | -0.670274 | -1.518166 | -1.410689 | H | 6.699866  | -6.059635 | -2.267744 |
| H                           | 5.780347  | 0.026563  | -1.505872 | H | 5.147769  | -6.624321 | -2.944341 |
| O                           | 5.391937  | -0.186815 | 0.501072  | C | 5.664425  | 1.186329  | 0.744253  |
| H                           | 3.514232  | -0.475568 | -2.271786 | H | 6.642604  | 1.230358  | 1.243003  |
| H                           | 1.732795  | -0.980939 | -0.517664 | H | 5.739793  | 1.737830  | -0.199825 |



|   |          |          |          |
|---|----------|----------|----------|
| C | 4.624288 | 1.842487 | 1.620316 |
| C | 4.423558 | 3.219842 | 1.539796 |
| C | 3.505878 | 3.849134 | 2.374218 |
| C | 2.766941 | 3.101848 | 3.287990 |
| C | 2.959472 | 1.725153 | 3.367113 |
| C | 3.889676 | 1.098901 | 2.542176 |
| H | 4.971761 | 3.804346 | 0.804457 |
| H | 3.351120 | 4.920206 | 2.290310 |
| H | 2.041649 | 3.588848 | 3.932328 |
| H | 2.384740 | 1.136232 | 4.075493 |
| H | 4.048904 | 0.026436 | 2.603168 |

gal\_re\_product\_gas\_conformation2

|    |           |           |           |
|----|-----------|-----------|-----------|
| C  | -5.332584 | 0.950048  | 1.711100  |
| C  | -4.891136 | 1.347179  | 0.447846  |
| C  | -5.819182 | 1.811586  | -0.481273 |
| C  | -7.171302 | 1.882306  | -0.156922 |
| C  | -7.607796 | 1.478225  | 1.101164  |
| C  | -6.684007 | 1.010295  | 2.034077  |
| C  | -3.427491 | 1.291615  | 0.089974  |
| O  | -2.845584 | 0.195620  | 0.754361  |
| C  | -1.441293 | 0.068524  | 0.675570  |
| C  | -1.150363 | -1.396052 | 1.045909  |
| C  | 0.345253  | -1.732694 | 0.803403  |
| N  | 1.108366  | -0.503602 | 0.630644  |
| C  | 0.735960  | 0.443906  | -0.508986 |
| C  | -0.795226 | 0.373007  | -0.668931 |
| C  | 0.561762  | -2.637537 | -0.427877 |
| O  | 1.953155  | -2.734455 | -0.658802 |
| C  | 2.351750  | -2.604198 | -2.008870 |
| C  | 3.653803  | -1.844401 | -2.068342 |
| C  | 3.894312  | -0.934245 | -3.105547 |
| C  | 5.064753  | -0.175587 | -3.125261 |
| C  | 6.014231  | -0.328451 | -2.112430 |
| C  | 5.784459  | -1.239750 | -1.084934 |
| C  | 4.608281  | -1.989176 | -1.059633 |
| H  | -1.403744 | -1.546928 | 2.104992  |
| O  | 1.424618  | 0.224925  | -1.634959 |
| C  | 2.350038  | -0.365602 | 1.120971  |
| O  | 2.640412  | -1.189085 | 2.137976  |
| C  | 3.728941  | -0.885069 | 3.057584  |
| C  | 3.530225  | 0.507124  | 3.650363  |
| O  | 3.158961  | 0.477297  | 0.688812  |
| C  | 3.560879  | -1.954383 | 4.131641  |
| C  | 5.085368  | -1.026255 | 2.375365  |
| Li | 3.148488  | 0.427156  | -1.227186 |

|   |           |           |           |
|---|-----------|-----------|-----------|
| C | 3.283306  | 3.204769  | -1.464736 |
| C | 4.720480  | 2.904002  | -1.027594 |
| B | 2.201045  | 3.495420  | -0.342916 |
| C | 0.734711  | 3.887016  | -0.797670 |
| C | 0.347912  | 3.531608  | -2.237646 |
| C | 2.617507  | 3.562261  | 1.180115  |
| C | 1.540537  | 3.216913  | 2.212093  |
| O | -1.914773 | -2.288674 | 0.256491  |
| H | -0.976022 | 0.723520  | 1.433531  |
| H | -1.113837 | 1.337571  | -1.073406 |
| H | 0.750794  | -2.249501 | 1.673214  |
| H | 0.130256  | -3.625739 | -0.237912 |
| H | 0.059154  | -2.209031 | -1.299719 |
| H | 2.472582  | -3.600646 | -2.461135 |
| H | 1.605215  | -2.038150 | -2.574273 |
| H | 3.134298  | -0.784827 | -3.867265 |
| H | 5.227709  | 0.544536  | -3.921194 |
| H | 6.919148  | 0.270407  | -2.120248 |
| H | 6.514906  | -1.356675 | -0.290535 |
| H | 4.398806  | -2.669258 | -0.239591 |
| H | -2.922353 | 2.227813  | 0.385595  |
| H | -3.327160 | 1.184949  | -0.999265 |
| H | -5.483906 | 2.098609  | -1.474791 |
| H | -7.884955 | 2.240674  | -0.892530 |
| H | -8.662596 | 1.524864  | 1.353679  |
| H | -7.019199 | 0.691365  | 3.016379  |
| H | -4.607350 | 0.573908  | 2.425754  |
| H | -1.054780 | -0.390976 | -1.408112 |
| H | 0.952274  | 1.426816  | -0.037129 |
| H | 0.662080  | 4.978508  | -0.647159 |
| H | -0.003151 | 3.474521  | -0.095616 |
| H | -0.693388 | 3.788633  | -2.456633 |
| H | 0.973237  | 4.067687  | -2.959480 |
| H | 0.485542  | 2.459816  | -2.421546 |
| H | 3.513336  | 2.956626  | 1.356002  |
| H | 2.943695  | 4.607323  | 1.331280  |
| H | 1.901634  | 3.340064  | 3.238181  |
| H | 0.652142  | 3.845127  | 2.095746  |
| H | 1.222897  | 2.172506  | 2.099227  |
| H | 2.871739  | 2.416642  | -2.120486 |
| H | 3.278675  | 4.081323  | -2.132196 |
| H | 5.388318  | 2.745415  | -1.880493 |
| H | 5.127422  | 3.734251  | -0.441511 |
| H | 4.779995  | 2.018155  | -0.383205 |
| H | 5.874539  | -0.918617 | 3.125775  |
| H | 5.176679  | -2.018933 | 1.924273  |

|   |           |           |           |    |           |           |           |
|---|-----------|-----------|-----------|----|-----------|-----------|-----------|
| H | 5.216794  | -0.266636 | 1.605174  | O  | 1.088922  | -1.187967 | 0.913332  |
| H | 4.332515  | -1.839905 | 4.897177  | C  | 2.330640  | -1.540839 | 1.521724  |
| H | 2.579880  | -1.865996 | 4.605276  | C  | 3.134830  | -0.316911 | 1.888874  |
| H | 3.647690  | -2.950607 | 3.690351  | C  | 2.486598  | 0.783338  | 2.456416  |
| H | 4.259138  | 0.668261  | 4.449619  | C  | 3.207314  | 1.921217  | 2.805532  |
| H | 3.661053  | 1.281280  | 2.892455  | C  | 4.586043  | 1.963739  | 2.597634  |
| H | 2.526172  | 0.593070  | 4.076794  | C  | 5.236689  | 0.867233  | 2.038092  |
| C | -3.251831 | -2.529968 | 0.654855  | C  | 4.511669  | -0.269358 | 1.681961  |
| H | -3.363436 | -3.618222 | 0.760366  | O  | -0.609472 | 2.335932  | -1.062861 |
| H | -3.452590 | -2.074777 | 1.631826  | C  | -2.278835 | 0.273847  | -1.497645 |
| C | -4.269540 | -2.022672 | -0.342350 | O  | -3.024151 | 1.172511  | -0.852636 |
| C | -5.615186 | -1.967376 | 0.024445  | C  | -4.191788 | 1.767525  | -1.559642 |
| C | -6.577851 | -1.521549 | -0.873631 | C  | -5.215596 | 0.692109  | -1.897079 |
| C | -6.202906 | -1.124650 | -2.155463 | O  | -2.567280 | -0.320679 | -2.496377 |
| C | -4.863261 | -1.180980 | -2.528356 | C  | -4.758669 | 2.737534  | -0.535366 |
| C | -3.900524 | -1.632719 | -1.627159 | C  | -3.673368 | 2.507393  | -2.786143 |
| H | -5.908860 | -2.251965 | 1.032534  | Li | -1.834286 | 2.172065  | 0.547014  |
| H | -7.616841 | -1.460188 | -0.565200 | C  | -2.430298 | 3.305489  | 2.273736  |
| H | -6.950402 | -0.763265 | -2.854997 | C  | -2.129423 | 4.527327  | 1.384540  |
| H | -4.563120 | -0.873725 | -3.525867 | B  | -1.149851 | 2.261948  | 2.585860  |
| H | -2.854097 | -1.680486 | -1.910299 | C  | -1.704924 | 0.708558  | 2.692224  |

gal\_si\_reactant\_gas\_conformation1

|   |           |           |           |   |           |           |           |
|---|-----------|-----------|-----------|---|-----------|-----------|-----------|
| C | 6.517855  | 0.433729  | -1.252929 | C | -2.601159 | 0.483136  | 3.915577  |
| C | 5.407493  | -0.363657 | -1.530310 | C | -0.323490 | 2.710954  | 3.913968  |
| C | 5.590354  | -1.719773 | -1.800690 | C | 0.278816  | 4.118497  | 3.854935  |
| C | 6.868915  | -2.269890 | -1.794145 | H | 1.272633  | -2.438547 | -0.721182 |
| C | 7.975268  | -1.468723 | -1.524058 | H | 1.478399  | -0.564733 | -2.371017 |
| C | 7.797323  | -0.114048 | -1.254693 | H | 1.639771  | 1.159535  | 0.166576  |
| C | 4.027650  | 0.243296  | -1.548073 | H | -0.732193 | -1.754210 | -1.775076 |
| O | 3.099290  | -0.728485 | -1.107629 | H | -1.140566 | -3.095028 | 0.233112  |
| C | 1.739924  | -0.422971 | -1.306425 | H | -1.085633 | -1.632538 | 1.256313  |
| C | 0.944297  | -1.418658 | -0.467315 | H | -3.094401 | -1.804498 | 2.069239  |
| C | -0.545589 | -1.302935 | -0.794430 | H | -3.535524 | -3.290942 | 1.191977  |
| N | -0.987301 | 0.107669  | -0.878181 | H | -4.607635 | 0.023215  | 2.262693  |
| C | -0.146035 | 1.202979  | -0.949849 | H | -6.917443 | 0.893327  | 2.009598  |
| C | 1.339699  | 0.981976  | -0.873252 | H | -8.540269 | -0.299448 | 0.558210  |
| C | -1.370825 | -2.017486 | 0.272603  | H | -7.848206 | -2.363924 | -0.631729 |
| O | -2.737545 | -1.777435 | 0.035961  | H | -5.542991 | -3.237377 | -0.358191 |
| C | -3.532379 | -2.191416 | 1.138275  | H | 2.067583  | -2.097023 | 2.429335  |
| C | -4.931610 | -1.666644 | 0.973959  | H | 2.911262  | -2.196433 | 0.864554  |
| C | -5.848358 | -2.330940 | 0.157902  | H | 5.017798  | -1.111228 | 1.215201  |
| C | -7.141657 | -1.839651 | 0.003772  | H | 6.308051  | 0.894872  | 1.862485  |
| C | -7.529653 | -0.678953 | 0.670687  | H | 5.149913  | 2.850433  | 2.869891  |
| C | -6.619209 | -0.008831 | 1.484010  | H | 2.686045  | 2.769086  | 3.240547  |
| C | -5.322402 | -0.498032 | 1.629984  | H | 1.407857  | 0.761269  | 2.597387  |
|   |           |           |           | H | 3.768504  | 0.570103  | -2.569285 |
|   |           |           |           | H | 4.006302  | 1.122630  | -0.888654 |

|   |           |           |           |   |           |           |           |
|---|-----------|-----------|-----------|---|-----------|-----------|-----------|
| H | 6.375692  | 1.486117  | -1.019586 | C | -0.251622 | 1.487938  | -0.578608 |
| H | 8.654212  | 0.514512  | -1.033735 | N | -1.062787 | 0.300274  | -0.706038 |
| H | 8.971608  | -1.898848 | -1.517172 | O | 1.118384  | -1.294285 | 1.166085  |
| H | 7.002235  | -3.327401 | -1.999642 | C | 2.384926  | -1.772414 | 1.607902  |
| H | 4.722113  | -2.339214 | -2.000058 | C | 3.260467  | -0.663445 | 2.144862  |
| H | -6.136127 | 1.187657  | -2.220423 | C | 2.712140  | 0.312739  | 2.978870  |
| H | -4.867643 | 0.035018  | -2.692081 | C | 3.501580  | 1.349471  | 3.467142  |
| H | -5.441877 | 0.097077  | -1.010794 | C | 4.856136  | 1.407487  | 3.143201  |
| H | -4.504716 | 3.044647  | -3.250593 | C | 5.413195  | 0.425998  | 2.327698  |
| H | -2.904463 | 3.229455  | -2.496763 | C | 4.616033  | -0.601688 | 1.828136  |
| H | -3.259747 | 1.814980  | -3.521036 | O | 3.013333  | -0.367817 | -0.775758 |
| H | -5.635087 | 3.232612  | -0.961022 | C | 3.894974  | 0.687457  | -1.097616 |
| H | -5.066765 | 2.202087  | 0.366673  | C | 5.275865  | 0.122909  | -1.319415 |
| H | -4.029802 | 3.509909  | -0.270406 | C | 5.449068  | -1.153192 | -1.855967 |
| H | 1.785074  | 1.764861  | -1.490183 | C | 6.729194  | -1.658619 | -2.065631 |
| H | -0.351529 | 2.318143  | 1.616762  | C | 7.847232  | -0.891484 | -1.747942 |
| H | -2.786205 | 3.670928  | 3.244814  | C | 7.679283  | 0.384196  | -1.214729 |
| H | -3.322686 | 2.782886  | 1.869266  | C | 6.399057  | 0.884766  | -0.996876 |
| H | -2.271988 | 0.390102  | 1.789752  | O | -0.460434 | 2.421529  | -1.425510 |
| H | -0.853129 | 0.011513  | 2.741228  | C | -2.251426 | 0.378622  | -1.435355 |
| H | -3.033748 | -0.525061 | 3.974055  | O | -2.635867 | -0.469278 | -2.198474 |
| H | -2.034074 | 0.641327  | 4.837427  | O | -2.947502 | 1.513572  | -1.158567 |
| H | -3.435268 | 1.196918  | 3.933896  | C | -4.129842 | 1.841302  | -1.972858 |
| H | -0.982087 | 2.662506  | 4.794918  | C | -4.490129 | 3.249430  | -1.507989 |
| H | 0.480784  | 1.989043  | 4.126321  | C | -3.766926 | 1.863972  | -3.455239 |
| H | 0.934758  | 4.341561  | 4.705592  | C | -5.244810 | 0.863763  | -1.634013 |
| H | 0.861855  | 4.261486  | 2.935678  | H | 1.237554  | -2.179747 | -0.683066 |
| H | -0.507426 | 4.882492  | 3.853144  | H | 1.354519  | -0.012123 | -1.945852 |
| H | -2.986276 | 5.203106  | 1.275283  | H | 1.290681  | 1.066046  | 0.913873  |
| H | -1.295665 | 5.100144  | 1.797206  | H | -0.831739 | -1.606415 | -1.428998 |
| H | -1.808012 | 4.261631  | 0.362652  | H | -1.218408 | -2.851324 | 0.598357  |

gal\_si\_TS\_gas\_conformation1

|   |           |           |           |   |           |           |           |
|---|-----------|-----------|-----------|---|-----------|-----------|-----------|
| C | -5.869067 | -1.830278 | 0.553498  | H | -1.092440 | -1.390375 | 1.600423  |
| C | -4.935700 | -1.257197 | 1.418567  | H | -3.088338 | -1.486021 | 2.486047  |
| C | -5.278920 | -0.103073 | 2.123875  | H | -3.626822 | -2.956352 | 1.638672  |
| C | -6.543155 | 0.464909  | 1.976001  | H | -4.551319 | 0.345544  | 2.796365  |
| C | -7.471190 | -0.116938 | 1.115950  | H | -6.803738 | 1.357391  | 2.536330  |
| C | -7.131415 | -1.264739 | 0.401556  | H | -8.457493 | 0.321890  | 1.001982  |
| C | -3.564026 | -1.859119 | 1.565964  | H | -7.851409 | -1.718425 | -0.272305 |
| O | -2.788010 | -1.495607 | 0.441078  | H | -5.597711 | -2.722102 | -0.005154 |
| C | -1.419161 | -1.767472 | 0.628215  | H | 2.169916  | -2.491110 | 2.408570  |
| C | -0.613957 | -1.093673 | -0.487741 | H | 2.902982  | -2.299326 | 0.799171  |
| C | 0.896481  | -1.237281 | -0.230122 | H | 5.045981  | -1.340722 | 1.156461  |
| C | 1.638665  | -0.074172 | -0.880334 | H | 6.464062  | 0.466710  | 2.056959  |
| C | 1.187048  | 1.198513  | -0.165231 | H | 5.472851  | 2.215902  | 3.523139  |
|   |           |           |           | H | 3.056349  | 2.113138  | 4.098120  |
|   |           |           |           | H | 1.653368  | 0.268392  | 3.224971  |

|                                  |           |           |           |    |           |           |           |
|----------------------------------|-----------|-----------|-----------|----|-----------|-----------|-----------|
| H                                | 3.544701  | 1.202058  | -2.007806 | C  | 7.101372  | 1.583214  | -1.846531 |
| H                                | 3.928803  | 1.423891  | -0.281612 | C  | 8.085771  | 1.534273  | -0.862983 |
| H                                | 6.267018  | 1.870094  | -0.556389 | C  | 7.724036  | 1.298345  | 0.461308  |
| H                                | 8.545672  | 0.985242  | -0.956911 | C  | 3.946899  | 0.978597  | 0.195518  |
| H                                | 8.844464  | -1.287952 | -1.909754 | O  | 3.248977  | 0.431098  | -0.897417 |
| H                                | 6.854509  | -2.654677 | -2.478771 | C  | 1.844551  | 0.594038  | -0.889505 |
| H                                | 4.572437  | -1.748246 | -2.089880 | C  | 1.294815  | -0.355249 | -1.952709 |
| H                                | -6.159568 | 1.161976  | -2.155693 | C  | -0.256924 | -0.321454 | -1.921728 |
| H                                | -4.976570 | -0.149266 | -1.933197 | N  | -0.739948 | 0.835232  | -1.152043 |
| H                                | -5.436437 | 0.874810  | -0.557325 | C  | -0.308282 | 0.906089  | 0.317509  |
| H                                | -4.581888 | 2.340931  | -4.007307 | C  | 1.114397  | 0.292363  | 0.407871  |
| H                                | -2.854464 | 2.449104  | -3.608437 | C  | -0.860223 | -1.624010 | -1.356775 |
| H                                | -3.613985 | 0.860342  | -3.847361 | O  | -2.256045 | -1.454563 | -1.225797 |
| H                                | -5.375186 | 3.596080  | -2.046630 | C  | -2.866358 | -2.640026 | -0.758870 |
| H                                | -4.714311 | 3.267804  | -0.437901 | C  | -4.356351 | -2.435292 | -0.686872 |
| H                                | -3.681927 | 3.960298  | -1.728640 | C  | -5.055491 | -2.082065 | -1.843193 |
| H                                | 1.756448  | 2.073391  | -0.478966 | C  | -6.428583 | -1.871082 | -1.798723 |
| H                                | -0.726251 | 2.038895  | 0.680824  | C  | -7.118452 | -2.009012 | -0.594593 |
| B                                | -1.171108 | 2.507364  | 1.898089  | C  | -6.429282 | -2.362402 | 0.560795  |
| C                                | 0.149129  | 3.210555  | 2.506300  | C  | -5.051851 | -2.574118 | 0.512802  |
| C                                | -2.486652 | 3.452869  | 1.626389  | O  | 1.661832  | -1.702649 | -1.721545 |
| C                                | -1.578195 | 1.091243  | 2.554089  | C  | 3.013894  | -2.065701 | -1.935474 |
| H                                | -2.912091 | 3.599020  | 2.628032  | C  | 3.747942  | -2.292063 | -0.632813 |
| C                                | -2.345599 | 4.861295  | 1.009697  | C  | 3.068246  | -2.797420 | 0.476311  |
| H                                | -3.273158 | 2.874615  | 1.111156  | C  | 3.735714  | -3.003345 | 1.680202  |
| C                                | -2.104254 | 1.194694  | 3.991676  | C  | 5.095342  | -2.716281 | 1.784540  |
| H                                | -2.329149 | 0.593076  | 1.919869  | C  | 5.781052  | -2.223438 | 0.677474  |
| H                                | -0.695258 | 0.433264  | 2.552945  | C  | 5.108893  | -2.012017 | -0.523650 |
| H                                | -2.359696 | 0.217204  | 4.419467  | O  | -0.309597 | 2.152585  | 0.806183  |
| H                                | -1.358919 | 1.652345  | 4.651418  | C  | -1.865163 | 1.406192  | -1.658717 |
| H                                | -3.005790 | 1.816596  | 4.048449  | O  | -2.552137 | 2.209707  | -0.756026 |
| H                                | -0.121625 | 3.680252  | 3.466233  | C  | -3.869588 | 2.733640  | -1.135106 |
| H                                | 0.863810  | 2.419686  | 2.774379  | C  | -4.830060 | 1.579716  | -1.376131 |
| C                                | 0.881930  | 4.244352  | 1.637925  | O  | -2.270591 | 1.279912  | -2.797089 |
| H                                | 1.887872  | 4.458528  | 2.015376  | C  | -4.293488 | 3.519867  | 0.105285  |
| H                                | 0.988275  | 3.894746  | 0.604257  | C  | -3.760969 | 3.682865  | -2.325691 |
| H                                | 0.350030  | 5.199020  | 1.593086  | Li | -1.802556 | 2.981814  | 0.782701  |
| H                                | -3.315548 | 5.324170  | 0.797935  | C  | -2.709982 | 1.495767  | 2.830943  |
| H                                | -1.809420 | 5.515196  | 1.700571  | C  | -2.384270 | 2.935546  | 3.244968  |
| H                                | -1.754217 | 4.918618  | 0.078179  | B  | -1.687665 | 0.303366  | 3.070722  |
| Li                               | -1.883570 | 3.002421  | -0.459633 | C  | -2.254327 | -1.129747 | 2.669833  |
|                                  |           |           |           | C  | -3.063847 | -1.741715 | 3.829247  |
|                                  |           |           |           | C  | -0.262900 | 0.343337  | 3.743429  |
|                                  |           |           |           | C  | 0.470517  | 1.660326  | 4.003329  |
|                                  |           |           |           | H  | 1.667441  | -0.045118 | -2.939701 |
|                                  |           |           |           | H  | 1.600375  | 1.628484  | -1.177589 |
| gal_si_product_gas_conformation1 |           |           |           |    |           |           |           |
| C                                | 6.386568  | 1.109775  | 0.795270  |    |           |           |           |
| C                                | 5.395575  | 1.162710  | -0.185374 |    |           |           |           |
| C                                | 5.762551  | 1.401578  | -1.509479 |    |           |           |           |

|   |           |           |           |
|---|-----------|-----------|-----------|
| H | 1.116787  | -0.787699 | 0.589348  |
| H | -0.644360 | -0.201387 | -2.932348 |
| H | -0.639146 | -2.452672 | -2.041682 |
| H | -0.424836 | -1.875469 | -0.378793 |
| H | -2.467216 | -2.911029 | 0.231572  |
| H | -2.635027 | -3.469264 | -1.447732 |
| H | -4.511615 | -2.848183 | 1.415835  |
| H | -6.959992 | -2.472530 | 1.501266  |
| H | -8.190670 | -1.843324 | -0.560007 |
| H | -6.962867 | -1.593658 | -2.702307 |
| H | -4.506205 | -1.952207 | -2.771895 |
| H | 2.991517  | -3.000653 | -2.510850 |
| H | 3.537399  | -1.309431 | -2.530126 |
| H | 5.639688  | -1.583651 | -1.370418 |
| H | 6.835585  | -1.975929 | 0.751567  |
| H | 5.615706  | -2.873029 | 2.724206  |
| H | 3.194374  | -3.388964 | 2.538963  |
| H | 2.006998  | -3.013022 | 0.389287  |
| H | 3.508084  | 1.949725  | 0.477940  |
| H | 3.878189  | 0.311191  | 1.068528  |
| H | 6.107457  | 0.898134  | 1.824718  |
| H | 8.485791  | 1.248703  | 1.233314  |
| H | 9.129289  | 1.674495  | -1.126676 |
| H | 7.376635  | 1.763454  | -2.881278 |
| H | 4.989370  | 1.426153  | -2.270206 |
| H | -5.843317 | 1.969695  | -1.513554 |
| H | -4.539744 | 1.019314  | -2.262695 |
| H | -4.832420 | 0.898207  | -0.518625 |
| H | -4.710535 | 4.213912  | -2.443067 |
| H | -2.975401 | 4.424144  | -2.145795 |
| H | -3.533374 | 3.143091  | -3.241627 |
| H | -5.273607 | 3.972742  | -0.059462 |
| H | -4.370165 | 2.869183  | 0.982239  |
| H | -3.599363 | 4.348001  | 0.312129  |
| H | 1.572149  | 0.784856  | 1.267517  |
| H | -1.022542 | 0.219219  | 0.829436  |
| H | -3.670430 | 1.196908  | 3.279137  |
| H | -2.922736 | 1.415682  | 1.750046  |
| H | -2.903238 | -1.048355 | 1.786441  |
| H | -1.438821 | -1.816226 | 2.404968  |
| H | -3.449092 | -2.734229 | 3.574742  |
| H | -2.451217 | -1.855027 | 4.729436  |
| H | -3.922833 | -1.115544 | 4.092436  |
| H | -0.390152 | -0.213252 | 4.689657  |
| H | 0.379518  | -0.322412 | 3.147928  |
| H | 1.457169  | 1.483149  | 4.442582  |

|   |           |          |          |
|---|-----------|----------|----------|
| H | 0.602654  | 2.200548 | 3.060981 |
| H | -0.080639 | 2.303287 | 4.695958 |
| H | -3.151672 | 3.648238 | 2.912995 |
| H | -2.330804 | 3.028988 | 4.332451 |
| H | -1.402509 | 3.254328 | 2.874624 |

gal\_si\_reactant\_gas\_conformation2

|    |           |           |           |
|----|-----------|-----------|-----------|
| C  | -7.015946 | -0.959761 | 0.854334  |
| C  | -5.873667 | -1.604158 | 0.379715  |
| C  | -5.993270 | -2.536846 | -0.651269 |
| C  | -7.241256 | -2.820408 | -1.197985 |
| C  | -8.380018 | -2.179704 | -0.715761 |
| C  | -8.265480 | -1.249263 | 0.313590  |
| C  | -4.528087 | -1.294473 | 0.983740  |
| O  | -3.545686 | -1.351166 | -0.032126 |
| C  | -2.213845 | -1.277040 | 0.418339  |
| C  | -1.326530 | -1.140892 | -0.812946 |
| C  | 0.145777  | -1.316217 | -0.412166 |
| N  | 0.421527  | -0.745633 | 0.931199  |
| C  | -0.456962 | 0.133323  | 1.565829  |
| C  | -1.931486 | -0.076768 | 1.313960  |
| C  | 1.033375  | -0.617464 | -1.440589 |
| O  | 2.386457  | -0.911171 | -1.190254 |
| C  | 3.236321  | 0.006721  | -1.873369 |
| C  | 4.638775  | -0.538370 | -1.879349 |
| C  | 4.859703  | -1.872841 | -2.228730 |
| C  | 6.144110  | -2.403538 | -2.206262 |
| C  | 7.224111  | -1.598189 | -1.845354 |
| C  | 7.012115  | -0.264120 | -1.512249 |
| C  | 5.722191  | 0.264408  | -1.526388 |
| O  | -1.440395 | 0.131702  | -1.407110 |
| C  | -2.637542 | 0.434762  | -2.124691 |
| C  | -3.465528 | 1.450160  | -1.375451 |
| C  | -2.847984 | 2.609976  | -0.897504 |
| C  | -3.572636 | 3.537984  | -0.157093 |
| C  | -4.927588 | 3.322591  | 0.096126  |
| C  | -5.550489 | 2.177301  | -0.392007 |
| C  | -4.819154 | 1.241505  | -1.122089 |
| O  | -0.091679 | 0.976849  | 2.368185  |
| C  | 1.651455  | -1.046718 | 1.553949  |
| O  | 2.204354  | -0.306137 | 2.346050  |
| O  | 2.050236  | -2.256788 | 1.237316  |
| Li | 1.735209  | 1.564514  | 2.124271  |
| B  | 2.366104  | 2.829637  | 0.553890  |
| C  | 3.796359  | 2.348556  | 1.249500  |
| C  | 4.813435  | 3.490490  | 1.367409  |





|    |           |           |           |                         |           |           |           |
|----|-----------|-----------|-----------|-------------------------|-----------|-----------|-----------|
| C  | 6.324673  | -1.919055 | -2.154927 | H                       | -6.603585 | 0.983721  | 1.279836  |
| C  | 7.249600  | -0.963715 | -1.733845 | H                       | -8.847431 | -0.064959 | 1.263131  |
| C  | 6.852001  | 0.358797  | -1.568107 | H                       | -9.070215 | -2.515094 | 0.930938  |
| C  | 5.528681  | 0.725946  | -1.811481 | H                       | -7.036925 | -3.905910 | 0.639408  |
| O  | -1.471580 | -0.884705 | -1.886035 | H                       | -4.787711 | -2.841576 | 0.677811  |
| C  | -2.759001 | -1.114096 | -2.437096 | H                       | -2.080669 | 1.315746  | 1.157765  |
| C  | -3.647314 | 0.106341  | -2.336479 | H                       | 0.522969  | 1.504701  | 1.045201  |
| C  | -3.099934 | 1.383873  | -2.464420 | H                       | 2.510267  | 4.243591  | 2.875338  |
| C  | -3.907277 | 2.512585  | -2.358048 | H                       | 2.170074  | 2.554617  | 3.011847  |
| C  | -5.276104 | 2.375123  | -2.136072 | H                       | 2.768986  | 1.524782  | 0.140111  |
| C  | -5.830355 | 1.102540  | -2.023004 | H                       | 3.599022  | 2.898888  | -0.565049 |
| C  | -5.018229 | -0.024426 | -2.122598 | H                       | 5.184456  | 1.604044  | 0.854850  |
| O  | -0.322308 | 0.580159  | 2.676296  | H                       | 4.901072  | 3.159248  | 1.648559  |
| C  | 1.823497  | -0.911987 | 1.510379  | H                       | 4.088276  | 1.696198  | 2.228550  |
| O  | 2.326733  | -0.228427 | 2.426213  | H                       | 0.983717  | 5.301750  | 0.497620  |
| O  | 2.369031  | -2.064206 | 1.121661  | H                       | 1.917151  | 4.677387  | -0.861006 |
| Li | 1.183710  | 0.648182  | 3.530532  | H                       | 0.279337  | 2.765464  | -1.094721 |
| B  | 2.093624  | 3.424129  | 0.964945  | H                       | -0.668168 | 3.420691  | 0.241535  |
| C  | 3.239525  | 2.494932  | 0.391383  | H                       | -0.511087 | 4.337292  | -1.262396 |
| C  | 4.420946  | 2.226839  | 1.332108  | H                       | 0.342630  | 4.032846  | 4.050637  |
| C  | 1.289206  | 4.379640  | -0.012773 | H                       | 0.022969  | 4.721581  | 2.460049  |
| C  | 0.024459  | 3.689206  | -0.562257 | H                       | -0.305505 | 3.003405  | 2.770904  |
| C  | 1.804646  | 3.469450  | 2.519801  | C                       | 3.711522  | -2.457115 | 1.532059  |
| C  | 0.385581  | 3.827324  | 2.975854  | C                       | 3.992178  | -3.635208 | 0.606325  |
| H  | -1.417810 | -2.518482 | -0.640063 | C                       | 4.716584  | -1.335751 | 1.279989  |
| H  | -1.665595 | -1.256627 | 1.471787  | C                       | 3.685699  | -2.898768 | 2.990748  |
| H  | -1.334821 | 1.069140  | -0.433055 | H                       | 5.722837  | -1.761025 | 1.215202  |
| H  | 0.835339  | -2.245537 | -0.376675 | H                       | 4.490211  | -0.848635 | 0.326750  |
| H  | 0.765552  | -0.985778 | -2.528149 | H                       | 4.694856  | -0.589891 | 2.073547  |
| H  | 0.674396  | 0.532063  | -1.610566 | H                       | 4.972940  | -4.063341 | 0.829850  |
| H  | 2.977357  | 1.200748  | -2.322929 | H                       | 3.230577  | -4.409532 | 0.732541  |
| H  | 2.780703  | -0.221490 | -3.374781 | H                       | 3.983677  | -3.292873 | -0.431758 |
| H  | 5.213424  | 1.755386  | -1.665330 | H                       | 4.669885  | -3.285155 | 3.272039  |
| H  | 7.567784  | 1.106559  | -1.241264 | H                       | 3.440913  | -2.056068 | 3.638766  |
| H  | 8.277930  | -1.250882 | -1.538323 | H                       | 2.947227  | -3.692342 | 3.135383  |
| H  | 6.631594  | -2.951499 | -2.290825 |                         |           |           |           |
| H  | 4.279159  | -2.288897 | -2.718832 | gal_re_reactant_solvent |           |           |           |
| H  | -2.592235 | -1.358189 | -3.494403 | C                       | 4.578266  | 1.119596  | 0.427244  |
| H  | -3.245878 | -1.969939 | -1.957868 | C                       | 4.549402  | 0.940165  | -0.956998 |
| H  | -5.450025 | -1.013271 | -1.987561 | C                       | 5.711114  | 0.524281  | -1.610367 |
| H  | -6.892324 | 0.981169  | -1.831924 | C                       | 6.883564  | 0.293463  | -0.895069 |
| H  | -5.905833 | 3.255137  | -2.050076 | C                       | 6.903984  | 0.480862  | 0.486078  |
| H  | -3.466672 | 3.501027  | -2.447781 | C                       | 5.747812  | 0.891201  | 1.146694  |
| H  | -2.030181 | 1.486195  | -2.627618 | C                       | 3.283535  | 1.186028  | -1.739761 |
| H  | -3.824774 | -0.160748 | 2.077695  | O                       | 2.501512  | -0.006865 | -1.858170 |
| H  | -4.268823 | 0.807681  | 0.649698  | C                       | 1.176803  | 0.124396  | -1.403509 |



|    |           |           |           |   |           |           |           |
|----|-----------|-----------|-----------|---|-----------|-----------|-----------|
| C  | 0.304279  | -0.980208 | -1.985689 | H | 3.685037  | 1.460148  | 0.945738  |
| C  | -1.165572 | -0.621106 | -1.703603 | H | 5.757563  | 1.042921  | 2.221508  |
| N  | -1.328880 | 0.132945  | -0.431038 | H | 7.819179  | 0.309638  | 1.044175  |
| C  | -0.357643 | 0.069325  | 0.583144  | H | 7.782455  | -0.022076 | -1.415507 |
| C  | 1.072673  | 0.030987  | 0.112538  | H | 5.697444  | 0.390595  | -2.689491 |
| C  | -2.026725 | -1.881066 | -1.646524 | H | 1.571400  | -0.870575 | 0.480024  |
| O  | -3.379900 | -1.514821 | -1.477667 | H | -0.413702 | 2.608494  | 0.731707  |
| C  | -4.191059 | -2.609838 | -1.094039 | H | 2.047686  | 4.445813  | 1.818158  |
| C  | -3.945597 | -3.060073 | 0.331133  | H | 2.130926  | 3.086189  | 0.732538  |
| C  | -3.600373 | -2.129885 | 1.314226  | H | 2.966625  | 2.375942  | 2.973140  |
| C  | -3.401986 | -2.538258 | 2.629760  | H | 1.496699  | 2.966388  | 3.738501  |
| C  | -3.554954 | -3.878910 | 2.978154  | H | 1.424884  | 1.556162  | 2.690217  |
| C  | -3.900677 | -4.810121 | 2.002490  | H | -1.290712 | 4.902207  | -0.141112 |
| C  | -4.086766 | -4.402109 | 0.683605  | H | 0.066548  | 5.805697  | 0.500737  |
| O  | -0.638900 | 0.156930  | 1.767327  | H | 0.354029  | 5.269918  | -1.971878 |
| C  | -2.458144 | 0.939254  | -0.254577 | H | 1.636796  | 4.548799  | -0.997018 |
| O  | -2.815384 | 1.388873  | 0.825784  | H | 0.303921  | 3.548029  | -1.572118 |
| O  | -3.033150 | 1.201051  | -1.404787 | H | -0.788384 | 3.283213  | 3.447472  |
| C  | -4.331441 | 1.886677  | -1.477309 | H | -0.309670 | 4.891399  | 3.096365  |
| C  | -5.346388 | 1.193404  | -0.574395 | H | -2.807660 | 4.729928  | 3.407898  |
| C  | -4.130294 | 3.355977  | -1.134506 | H | -2.389821 | 5.321892  | 1.794082  |
| C  | -4.705537 | 1.698284  | -2.941249 | H | -2.929848 | 3.670957  | 2.002845  |
| Li | -1.431804 | 1.953007  | 2.082817  | H | -5.661900 | 2.186123  | -3.143504 |
| C  | -0.848672 | 4.046881  | 2.643582  | H | -3.943511 | 2.137805  | -3.589941 |
| B  | 0.003465  | 3.673511  | 1.262588  | H | -4.791823 | 0.632045  | -3.166938 |
| C  | -0.223338 | 4.813658  | 0.115104  | H | -5.075905 | 3.888444  | -1.269659 |
| C  | 0.555160  | 4.542635  | -1.175702 | H | -3.803274 | 3.477583  | -0.100476 |
| C  | -2.318686 | 4.461040  | 2.464900  | H | -3.383017 | 3.800078  | -1.797888 |
| C  | 1.590894  | 3.462195  | 1.618294  | H | -6.347582 | 1.539167  | -0.844671 |
| C  | 1.893642  | 2.543455  | 2.808864  | H | -5.296543 | 0.111976  | -0.732417 |
| H  | 0.444897  | -1.032476 | -3.074162 | H | -5.172031 | 1.411060  | 0.478860  |
| O  | 0.558029  | -2.242043 | -1.406063 | C | 1.779198  | -2.880918 | -1.783983 |
| H  | 0.757928  | 1.087207  | -1.739705 | H | 1.507481  | -3.891223 | -2.111996 |
| H  | 1.530742  | 0.901737  | 0.596197  | H | 2.244279  | -2.354834 | -2.623333 |
| H  | -1.513207 | 0.031378  | -2.504211 | C | 2.734706  | -2.956697 | -0.618870 |
| H  | -1.890670 | -2.451076 | -2.577783 | C | 4.036719  | -2.473499 | -0.721252 |
| H  | -1.687981 | -2.504288 | -0.811746 | C | 4.902980  | -2.541150 | 0.368276  |
| H  | -5.223501 | -2.261434 | -1.206758 | C | 4.464607  | -3.082151 | 1.573409  |
| H  | -4.050264 | -3.454048 | -1.785090 | C | 3.160134  | -3.564164 | 1.685019  |
| H  | -4.340914 | -5.133784 | -0.079578 | C | 2.301878  | -3.506413 | 0.591899  |
| H  | -4.014363 | -5.857270 | 2.264614  | H | 4.365498  | -2.015559 | -1.649559 |
| H  | -3.400512 | -4.196749 | 4.004256  | H | 5.909855  | -2.146757 | 0.277023  |
| H  | -3.126917 | -1.807175 | 3.383905  | H | 5.133844  | -3.123916 | 2.426987  |
| H  | -3.482233 | -1.082907 | 1.049927  | H | 2.813203  | -3.984485 | 2.623810  |
| H  | 3.529138  | 1.525632  | -2.752865 | H | 1.282314  | -3.873973 | 0.676422  |
| H  | 2.693175  | 1.974673  | -1.255276 |   |           |           |           |

gal\_re\_TS\_solvent

|    |           |           |           |   |           |           |           |
|----|-----------|-----------|-----------|---|-----------|-----------|-----------|
| C  | 4.335155  | 1.427913  | 0.713027  | H | -4.365712 | -3.448134 | -0.597776 |
| C  | 4.367911  | 1.624014  | -0.669663 | H | -2.799759 | -4.275922 | -0.494510 |
| C  | 5.602227  | 1.718205  | -1.311052 | H | -1.539251 | -4.162738 | 1.585298  |
| C  | 6.788294  | 1.627629  | -0.583916 | H | -1.321782 | -3.332283 | 3.908095  |
| C  | 6.745643  | 1.437713  | 0.794683  | H | -2.855703 | -1.573707 | 4.748568  |
| C  | 5.515137  | 1.333845  | 1.442197  | H | -4.625294 | -0.661371 | 3.257340  |
| C  | 3.081469  | 1.718491  | -1.450981 | H | -4.806778 | -1.471784 | 0.920300  |
| O  | 2.518998  | 0.424103  | -1.646590 | H | 3.265371  | 2.174830  | -2.431875 |
| C  | 1.146461  | 0.321605  | -1.341379 | H | 2.368136  | 2.356992  | -0.914615 |
| C  | 0.574975  | -0.894024 | -2.065311 | H | 3.378346  | 1.355285  | 1.224373  |
| C  | -0.949156 | -0.966544 | -1.794696 | H | 5.475241  | 1.184329  | 2.516660  |
| N  | -1.381644 | -0.032048 | -0.732395 | H | 7.667801  | 1.371704  | 1.363751  |
| C  | -0.574859 | 0.030403  | 0.472685  | H | 7.743471  | 1.710212  | -1.093259 |
| C  | 0.904019  | 0.130478  | 0.151553  | H | 5.634230  | 1.871553  | -2.386923 |
| C  | -1.407744 | -2.371010 | -1.394046 | H | 1.390363  | -0.793177 | 0.483198  |
| O  | -2.816185 | -2.344469 | -1.258243 | H | -0.842153 | 1.695998  | 0.693494  |
| C  | -3.309859 | -3.314855 | -0.343030 | H | 0.682900  | 4.336535  | 1.826190  |
| C  | -3.178873 | -2.862510 | 1.093948  | H | 1.303848  | 3.123691  | 0.746785  |
| C  | -4.041282 | -1.874658 | 1.577109  | H | 2.337196  | 2.793669  | 2.974584  |
| C  | -3.929855 | -1.410573 | 2.885664  | H | 0.756460  | 2.783445  | 3.751948  |
| C  | -2.942200 | -1.930027 | 3.726755  | H | 1.224315  | 1.440383  | 2.728876  |
| C  | -2.084976 | -2.920216 | 3.256104  | H | -2.665254 | 3.584391  | 0.071662  |
| C  | -2.206858 | -3.384183 | 1.947161  | H | -1.544271 | 4.864082  | 0.494079  |
| O  | -0.984252 | -0.427023 | 1.550266  | H | -1.377239 | 4.414723  | -1.954002 |
| C  | -2.669357 | 0.433665  | -0.729990 | H | 0.118842  | 3.857915  | -1.197350 |
| O  | -3.257175 | 0.814586  | 0.279657  | H | -1.131982 | 2.693799  | -1.641152 |
| O  | -3.176792 | 0.505453  | -1.951329 | H | -1.540732 | 1.834759  | 3.275760  |
| C  | -4.561188 | 0.918442  | -2.179530 | H | -1.357816 | 3.526669  | 3.345047  |
| C  | -5.514535 | -0.001881 | -1.424357 | H | -3.765768 | 2.904721  | 3.625380  |
| C  | -4.729263 | 2.383766  | -1.797249 | H | -3.483588 | 4.008855  | 2.276080  |
| C  | -4.710913 | 0.724815  | -3.683646 | H | -3.832907 | 2.340198  | 1.945557  |
| Li | -2.461111 | 0.622829  | 1.969469  | H | -5.715497 | 1.018382  | -3.997079 |
| C  | -1.772302 | 2.748038  | 2.688511  | H | -3.982490 | 1.338177  | -4.220185 |
| B  | -0.900474 | 2.859845  | 1.284125  | H | -4.551442 | -0.324163 | -3.947720 |
| C  | -1.593556 | 3.813161  | 0.162521  | H | -5.715183 | 2.728546  | -2.122108 |
| C  | -0.966722 | 3.699420  | -1.230593 | H | -4.642279 | 2.520767  | -0.718665 |
| C  | -3.292284 | 2.995383  | 2.640829  | H | -3.966703 | 2.990984  | -2.294165 |
| C  | 0.650233  | 3.253015  | 1.624568  | H | -6.524563 | 0.122022  | -1.824125 |
| C  | 1.282102  | 2.532797  | 2.824650  | H | -5.204170 | -1.041986 | -1.565983 |
| H  | 0.749976  | -0.791863 | -3.144436 | H | -5.527922 | 0.231863  | -0.359330 |
| O  | 1.150822  | -2.105182 | -1.613008 | C | 2.473281  | -2.388744 | -2.059740 |
| H  | 0.607313  | 1.214814  | -1.692372 | H | 2.444679  | -3.399309 | -2.487155 |
| H  | 1.313901  | 0.960666  | 0.724855  | H | 2.774245  | -1.690003 | -2.846185 |
| H  | -1.479571 | -0.663319 | -2.696002 | C | 3.468184  | -2.348642 | -0.924542 |
| H  | -1.105831 | -3.105005 | -2.151661 | C | 4.727532  | -1.776293 | -1.097028 |
| H  | -0.926535 | -2.640702 | -0.445267 | C | 5.654875  | -1.783014 | -0.059208 |

|   |          |           |           |
|---|----------|-----------|-----------|
| C | 5.322883 | -2.349044 | 1.169126  |
| C | 4.061576 | -2.912634 | 1.352929  |
| C | 3.141583 | -2.917458 | 0.307861  |
| H | 4.973635 | -1.299543 | -2.042374 |
| H | 6.625217 | -1.318294 | -0.201682 |
| H | 6.040349 | -2.341211 | 1.983906  |
| H | 3.794830 | -3.350170 | 2.310111  |
| H | 2.154859 | -3.352317 | 0.446215  |

gal\_re\_product\_solvent

|    |           |           |           |
|----|-----------|-----------|-----------|
| C  | -5.239915 | 1.111624  | 1.386962  |
| C  | -4.832838 | 1.177450  | 0.052991  |
| C  | -5.795501 | 1.313288  | -0.945309 |
| C  | -7.148072 | 1.385052  | -0.619436 |
| C  | -7.549027 | 1.311395  | 0.711382  |
| C  | -6.590392 | 1.173936  | 1.714330  |
| C  | -3.368395 | 1.114273  | -0.303345 |
| O  | -2.729678 | 0.265455  | 0.620811  |
| C  | -1.321331 | 0.194780  | 0.576025  |
| C  | -0.961530 | -1.075294 | 1.365135  |
| C  | 0.550231  | -1.396863 | 1.218184  |
| N  | 1.258100  | -0.240742 | 0.679765  |
| C  | 0.844911  | 0.317323  | -0.676511 |
| C  | -0.677615 | 0.114342  | -0.801124 |
| C  | 0.811899  | -2.617157 | 0.312083  |
| O  | 2.204800  | -2.707859 | 0.089871  |
| C  | 2.569722  | -2.994191 | -1.242721 |
| C  | 3.896133  | -2.349736 | -1.562223 |
| C  | 4.273553  | -2.172651 | -2.899024 |
| C  | 5.484271  | -1.565146 | -3.219166 |
| C  | 6.336660  | -1.123845 | -2.204740 |
| C  | 5.966291  | -1.293626 | -0.873274 |
| C  | 4.749972  | -1.901746 | -0.552009 |
| H  | -1.211646 | -0.916148 | 2.423053  |
| O  | 1.557633  | -0.166954 | -1.702168 |
| C  | 2.493684  | 0.089246  | 1.094199  |
| O  | 2.829408  | -0.421627 | 2.287870  |
| C  | 3.900949  | 0.166720  | 3.086156  |
| C  | 3.620853  | 1.650253  | 3.302724  |
| O  | 3.256187  | 0.818555  | 0.434956  |
| C  | 3.791689  | -0.595904 | 4.401599  |
| C  | 5.264157  | -0.072201 | 2.446372  |
| Li | 3.293181  | 0.154597  | -1.387276 |
| C  | 2.184609  | 3.228094  | -2.293800 |
| C  | 3.708852  | 3.275570  | -2.157988 |
| B  | 1.316879  | 3.618857  | -1.035429 |

|   |           |           |           |
|---|-----------|-----------|-----------|
| C | -0.257836 | 3.750830  | -1.172076 |
| C | -0.873392 | 3.496288  | -2.549712 |
| C | 1.989800  | 3.914348  | 0.364992  |
| C | 1.142439  | 3.633798  | 1.608788  |
| O | -1.678921 | -2.198089 | 0.883115  |
| H | -0.897752 | 1.068971  | 1.102021  |
| H | -1.049365 | 0.889038  | -1.476828 |
| H | 0.973918  | -1.609105 | 2.199289  |
| H | 0.436079  | -3.524125 | 0.796998  |
| H | 0.284404  | -2.498256 | -0.638707 |
| H | 2.636270  | -4.082695 | -1.395743 |
| H | 1.823870  | -2.581365 | -1.930435 |
| H | 3.604976  | -2.502398 | -3.690218 |
| H | 5.761090  | -1.429255 | -4.259764 |
| H | 7.280150  | -0.648894 | -2.453019 |
| H | 6.621566  | -0.950196 | -0.078584 |
| H | 4.439983  | -2.017006 | 0.481745  |
| H | -2.917757 | 2.121808  | -0.270801 |
| H | -3.260511 | 0.730979  | -1.327745 |
| H | -5.485636 | 1.343857  | -1.986991 |
| H | -7.888770 | 1.484868  | -1.406954 |
| H | -8.603115 | 1.358734  | 0.966814  |
| H | -6.897615 | 1.114743  | 2.754174  |
| H | -4.488279 | 0.988658  | 2.160107  |
| H | -0.884930 | -0.852582 | -1.269512 |
| H | 1.001409  | 1.405485  | -0.505711 |
| H | -0.543481 | 4.750577  | -0.808677 |
| H | -0.703766 | 3.071132  | -0.428149 |
| H | -1.968063 | 3.495919  | -2.520101 |
| H | -0.565069 | 4.262091  | -3.268491 |
| H | -0.551107 | 2.531651  | -2.957029 |
| H | 2.951730  | 3.396175  | 0.446496  |
| H | 2.243027  | 4.989106  | 0.327593  |
| H | 1.644479  | 3.947023  | 2.529787  |
| H | 0.175867  | 4.146157  | 1.567233  |
| H | 0.940634  | 2.558104  | 1.697270  |
| H | 1.863367  | 2.196058  | -2.530066 |
| H | 1.859738  | 3.811521  | -3.166953 |
| H | 4.214040  | 2.923131  | -3.063497 |
| H | 4.061705  | 4.293623  | -1.962002 |
| H | 4.051770  | 2.661762  | -1.316908 |
| H | 6.041123  | 0.306870  | 3.116782  |
| H | 5.434546  | -1.143922 | 2.304532  |
| H | 5.339199  | 0.438664  | 1.486682  |
| H | 4.554385  | -0.242299 | 5.099971  |
| H | 2.806723  | -0.443587 | 4.850362  |

|                         |           |           |           |    |           |           |           |
|-------------------------|-----------|-----------|-----------|----|-----------|-----------|-----------|
| H                       | 3.938988  | -1.666042 | 4.233727  | C  | -2.871177 | 2.653130  | -0.902519 |
| H                       | 4.352015  | 2.058008  | 4.006146  | C  | -3.609966 | 3.570598  | -0.162120 |
| H                       | 3.684686  | 2.205823  | 2.365285  | C  | -4.957378 | 3.326166  | 0.106085  |
| H                       | 2.621866  | 1.783380  | 3.728240  | C  | -5.557934 | 2.162660  | -0.368200 |
| C                       | -3.004306 | -2.374779 | 1.350287  | C  | -4.811815 | 1.239322  | -1.099396 |
| H                       | -3.062632 | -3.383492 | 1.782300  | O  | -0.084459 | 0.987743  | 2.364915  |
| H                       | -3.232963 | -1.655944 | 2.145563  | C  | 1.660406  | -1.032931 | 1.542338  |
| C                       | -4.041856 | -2.242606 | 0.257333  | O  | 2.228892  | -0.285119 | 2.318041  |
| C                       | -5.392631 | -2.184856 | 0.605811  | O  | 2.040928  | -2.252527 | 1.243475  |
| C                       | -6.374115 | -2.070371 | -0.372556 | Li | 1.747380  | 1.588223  | 2.159818  |
| C                       | -6.014740 | -2.014860 | -1.717886 | B  | 2.364505  | 2.878711  | 0.554567  |
| C                       | -4.669888 | -2.076388 | -2.071794 | C  | 3.805013  | 2.444511  | 1.257318  |
| C                       | -3.688142 | -2.193318 | -1.088599 | C  | 4.781065  | 3.620080  | 1.391947  |
| H                       | -5.677335 | -2.206569 | 1.655623  | C  | 2.620181  | 3.601910  | -0.895266 |
| H                       | -7.418567 | -2.003133 | -0.083895 | C  | 1.537844  | 3.395480  | -1.962228 |
| H                       | -6.778097 | -1.912720 | -2.483050 | C  | 1.487649  | 3.846194  | 1.583126  |
| H                       | -4.380193 | -2.033004 | -3.117715 | C  | 0.072124  | 4.198112  | 1.112297  |
| H                       | -2.637946 | -2.238329 | -1.357641 | H  | -1.576769 | -1.885188 | -1.561231 |
| gal_si_reactant_solvent |           |           |           | H  | -1.936556 | -2.204205 | 0.929224  |
| C                       | -7.005726 | -1.013837 | 0.859433  | H  | -2.337456 | 0.838882  | 0.885052  |
| C                       | -5.857959 | -1.640924 | 0.373897  | H  | 0.373651  | -2.370819 | -0.368616 |
| C                       | -5.970460 | -2.556288 | -0.674174 | H  | 0.764565  | -0.961737 | -2.455670 |
| C                       | -7.216186 | -2.840186 | -1.226794 | H  | 0.869285  | 0.460716  | -1.387168 |
| C                       | -8.360627 | -2.216794 | -0.733363 | H  | 3.229177  | 0.976699  | -1.385996 |
| C                       | -8.253383 | -1.303616 | 0.312705  | H  | 2.897966  | 0.111762  | -2.906190 |
| C                       | -4.513969 | -1.333872 | 0.983267  | H  | 5.598058  | 1.266007  | -1.291165 |
| O                       | -3.536927 | -1.335775 | -0.040827 | H  | 7.884264  | 0.300979  | -1.281906 |
| C                       | -2.204237 | -1.268496 | 0.408320  | H  | 8.225146  | -2.090851 | -1.841497 |
| C                       | -1.318043 | -1.115170 | -0.820891 | H  | 6.277364  | -3.509076 | -2.441244 |
| C                       | 0.150670  | -1.303251 | -0.419550 | H  | 3.993395  | -2.529623 | -2.460495 |
| N                       | 0.432425  | -0.724620 | 0.919737  | H  | -2.292119 | 0.902012  | -3.072710 |
| C                       | -0.449895 | 0.141984  | 1.561575  | H  | -3.194819 | -0.436023 | -2.321585 |
| C                       | -1.923996 | -0.077468 | 1.317672  | H  | -5.272533 | 0.316312  | -1.442191 |
| C                       | 1.046768  | -0.617513 | -1.448111 | H  | -6.604658 | 1.961232  | -0.160031 |
| O                       | 2.398580  | -0.910497 | -1.182143 | H  | -5.534656 | 4.040408  | 0.684562  |
| C                       | 3.258202  | -0.008514 | -1.871631 | H  | -3.133341 | 4.473938  | 0.206584  |
| C                       | 4.653583  | -0.572432 | -1.879405 | H  | -1.817666 | 2.834757  | -1.102836 |
| C                       | 4.853565  | -1.915742 | -2.208844 | H  | -4.252023 | -2.089010 | 1.742904  |
| C                       | 6.131802  | -2.462335 | -2.192561 | H  | -4.555032 | -0.354123 | 1.479172  |
| C                       | 7.226832  | -1.665201 | -1.857612 | H  | -6.919583 | -0.286396 | 1.662766  |
| C                       | 7.035711  | -0.322692 | -1.544222 | H  | -9.139601 | -0.808355 | 0.696531  |
| C                       | 5.751751  | 0.221616  | -1.552362 | H  | -9.330991 | -2.436818 | -1.166630 |
| O                       | -1.428951 | 0.170203  | -1.393711 | H  | -7.294422 | -3.549237 | -2.044905 |
| C                       | -2.622070 | 0.474063  | -2.119146 | H  | -5.073874 | -3.029867 | -1.061203 |
| C                       | -3.465108 | 1.475821  | -1.367521 | H  | -2.359403 | -0.201802 | 2.313475  |
|                         |           |           |           | H  | 1.706020  | 1.827221  | 0.338512  |

|   |           |           |           |    |           |           |           |
|---|-----------|-----------|-----------|----|-----------|-----------|-----------|
| H | 2.057037  | 4.778247  | 1.713617  | C  | 3.373719  | 0.783936  | -2.018708 |
| H | 1.399330  | 3.475243  | 2.627370  | C  | 4.814001  | 0.362031  | -1.934045 |
| H | 3.726209  | 1.991241  | 2.267167  | C  | 5.221805  | -0.816936 | -2.563251 |
| H | 4.281542  | 1.654717  | 0.654204  | C  | 6.526388  | -1.276443 | -2.421622 |
| H | 5.751056  | 3.328726  | 1.811314  | C  | 7.438983  | -0.554162 | -1.651877 |
| H | 4.968372  | 4.078317  | 0.414992  | C  | 7.042370  | 0.627510  | -1.032439 |
| H | 4.368014  | 4.402982  | 2.037662  | C  | 5.731722  | 1.082619  | -1.172747 |
| H | 2.759328  | 4.684620  | -0.743974 | O  | -1.364396 | 0.108579  | -1.748919 |
| H | 3.578717  | 3.261333  | -1.323671 | C  | -2.566906 | 0.032465  | -2.515926 |
| H | 1.485556  | 2.344435  | -2.270020 | C  | -3.579161 | 1.060838  | -2.068790 |
| H | 0.543467  | 3.658830  | -1.587037 | C  | -3.218296 | 2.408525  | -2.011827 |
| H | 1.711941  | 3.986257  | -2.870185 | C  | -4.131609 | 3.368857  | -1.586093 |
| H | -0.493569 | 4.785204  | 1.845902  | C  | -5.425621 | 2.991319  | -1.230167 |
| H | 0.104733  | 4.781836  | 0.186323  | C  | -5.798944 | 1.651412  | -1.303852 |
| H | -0.504903 | 3.287819  | 0.903309  | C  | -4.877536 | 0.691932  | -1.718216 |
| C | 3.336124  | -2.781584 | 1.714132  | O  | 0.063970  | 0.015723  | 2.904501  |
| C | 3.508626  | -4.014225 | 0.838107  | C  | 1.932133  | -1.313830 | 1.337530  |
| C | 4.471631  | -1.792605 | 1.471510  | O  | 2.484896  | -0.905252 | 2.354912  |
| C | 3.183096  | -3.146814 | 3.183830  | O  | 2.380383  | -2.335197 | 0.628652  |
| H | 5.416131  | -2.344362 | 1.485000  | Li | 1.782059  | 0.609233  | 3.224833  |
| H | 4.360524  | -1.335273 | 0.486648  | B  | 1.379915  | 2.528398  | 1.483919  |
| H | 4.507836  | -1.010139 | 2.228628  | C  | 2.958036  | 2.060921  | 1.467258  |
| H | 4.409938  | -4.555092 | 1.136171  | C  | 3.896393  | 3.265651  | 1.288410  |
| H | 2.648590  | -4.681580 | 0.938557  | C  | 1.035468  | 3.522773  | 0.233928  |
| H | 3.608252  | -3.711171 | -0.207772 | C  | -0.368227 | 3.449342  | -0.376559 |
| H | 4.112906  | -3.599238 | 3.539436  | C  | 0.896282  | 3.089008  | 2.939792  |
| H | 2.981004  | -2.256377 | 3.782869  | C  | -0.561934 | 3.543241  | 3.035594  |
| H | 2.372181  | -3.867417 | 3.319680  | H  | -1.275081 | -1.928177 | -1.487410 |

gal\_si\_TS\_solvent

|   |           |           |           |   |           |           |           |
|---|-----------|-----------|-----------|---|-----------|-----------|-----------|
| C | -6.641053 | -0.964775 | 1.018886  | H | -1.571050 | -1.852214 | 0.979965  |
| C | -5.431658 | -1.572620 | 0.683839  | H | -1.507831 | 1.139740  | 0.384954  |
| C | -5.446211 | -2.784179 | -0.010307 | H | 0.890828  | -1.935243 | -0.877862 |
| C | -6.654361 | -3.379234 | -0.360439 | H | 0.906050  | 0.007034  | -2.495973 |
| C | -7.860542 | -2.770797 | -0.016800 | H | 0.980800  | 1.093879  | -1.086622 |
| C | -7.851713 | -1.562053 | 0.674418  | H | 3.232694  | 1.781384  | -1.575817 |
| C | -4.121842 | -0.937245 | 1.077045  | H | 3.040281  | 0.826783  | -3.067481 |
| O | -3.205719 | -1.074213 | 0.008000  | H | 5.412414  | 1.996401  | -0.678150 |
| C | -1.847851 | -0.981507 | 0.362412  | H | 7.749732  | 1.193677  | -0.434775 |
| C | -1.047555 | -1.006378 | -0.935948 | H | 8.457398  | -0.912366 | -1.539601 |
| C | 0.472144  | -0.964330 | -0.618151 | H | 6.834265  | -2.195511 | -2.910636 |
| N | 0.760860  | -0.787444 | 0.825520  | H | 4.503516  | -1.377935 | -3.156000 |
| C | -0.044641 | 0.088611  | 1.655932  | H | -2.280807 | 0.224264  | -3.557681 |
| C | -1.445510 | 0.305227  | 1.084429  | H | -2.999951 | -0.970412 | -2.452609 |
| C | 1.215865  | 0.082257  | -1.445540 | H | -5.161459 | -0.356836 | -1.744335 |
| O | 2.598649  | -0.176151 | -1.318835 | H | -6.803272 | 1.345428  | -1.025888 |
|   |           |           |           | H | -6.139170 | 3.738799  | -0.897677 |
|   |           |           |           | H | -3.833397 | 4.411661  | -1.535548 |

|                        |           |           |           |    |           |           |           |
|------------------------|-----------|-----------|-----------|----|-----------|-----------|-----------|
| H                      | -2.212635 | 2.703731  | -2.295878 | C  | -4.170637 | -0.312919 | 1.022492  |
| H                      | -3.717182 | -1.429734 | 1.975985  | O  | -3.282471 | -1.004404 | 0.175592  |
| H                      | -4.281350 | 0.123323  | 1.315139  | C  | -1.908052 | -0.844554 | 0.464605  |
| H                      | -6.633746 | -0.011971 | 1.542325  | C  | -1.142702 | -1.413832 | -0.728265 |
| H                      | -8.786820 | -1.078023 | 0.937979  | C  | 0.390942  | -1.225258 | -0.512579 |
| H                      | -8.802369 | -3.234414 | -0.292264 | N  | 0.710829  | -0.716560 | 0.830057  |
| H                      | -6.655965 | -4.318508 | -0.904591 | C  | -0.075794 | 0.447555  | 1.464075  |
| H                      | -4.502919 | -3.244874 | -0.287291 | C  | -1.393038 | 0.569813  | 0.676223  |
| H                      | -2.071966 | 0.516396  | 1.952218  | C  | 1.025746  | -0.324810 | -1.578505 |
| H                      | 0.635364  | 1.439459  | 1.263521  | O  | 2.423109  | -0.365178 | -1.384319 |
| H                      | 1.549711  | 3.945893  | 3.171580  | C  | 3.128151  | 0.373877  | -2.364997 |
| H                      | 1.071385  | 2.403351  | 3.790688  | C  | 4.587017  | 0.032036  | -2.225648 |
| H                      | 3.313452  | 1.550576  | 2.381434  | C  | 5.010269  | -1.267123 | -2.519913 |
| H                      | 3.145429  | 1.330883  | 0.663956  | C  | 6.330705  | -1.646300 | -2.307440 |
| H                      | 4.954110  | 2.989444  | 1.370851  | C  | 7.247361  | -0.722754 | -1.803483 |
| H                      | 3.752616  | 3.738891  | 0.311400  | C  | 6.837616  | 0.577354  | -1.523787 |
| H                      | 3.702896  | 4.034259  | 2.045265  | C  | 5.510433  | 0.952091  | -1.734637 |
| H                      | 1.227547  | 4.557327  | 0.563144  | O  | -1.459371 | -0.746430 | -1.940477 |
| H                      | 1.753771  | 3.356583  | -0.584354 | C  | -2.745425 | -0.940298 | -2.508049 |
| H                      | -0.524591 | 2.488603  | -0.879915 | C  | -3.630257 | 0.272957  | -2.323359 |
| H                      | -1.159953 | 3.538738  | 0.374444  | C  | -3.072583 | 1.552759  | -2.344178 |
| H                      | -0.539960 | 4.233005  | -1.125787 | C  | -3.874947 | 2.677350  | -2.171803 |
| H                      | -0.837114 | 3.879474  | 4.041338  | C  | -5.249062 | 2.534314  | -1.986672 |
| H                      | -0.754211 | 4.373003  | 2.348613  | C  | -5.812652 | 1.260443  | -1.976087 |
| H                      | -1.240511 | 2.726554  | 2.762154  | C  | -5.005779 | 0.137050  | -2.142885 |
| C                      | 3.705377  | -2.915924 | 0.881331  | O  | -0.312876 | 0.237734  | 2.765640  |
| C                      | 3.913721  | -3.776889 | -0.357835 | C  | 1.855558  | -1.085508 | 1.438083  |
| C                      | 4.781881  | -1.837026 | 0.957824  | O  | 2.336943  | -0.509941 | 2.431810  |
| C                      | 3.632226  | -3.761999 | 2.145278  | O  | 2.427102  | -2.170563 | 0.908182  |
| H                      | 5.756147  | -2.303647 | 0.785051  | Li | 1.148322  | 0.069467  | 3.738112  |
| H                      | 4.615811  | -1.094663 | 0.173610  | B  | 2.025857  | 3.407791  | 1.213909  |
| H                      | 4.795381  | -1.339412 | 1.926963  | C  | 3.193193  | 2.560987  | 0.563758  |
| H                      | 4.860031  | -4.317599 | -0.278049 | C  | 4.335790  | 2.139481  | 1.494926  |
| H                      | 3.101835  | -4.501319 | -0.464008 | C  | 1.196500  | 4.414416  | 0.312775  |
| H                      | 3.944484  | -3.140151 | -1.246415 | C  | -0.040461 | 3.708955  | -0.279608 |
| H                      | 4.593886  | -4.258632 | 2.302261  | C  | 1.713305  | 3.270934  | 2.756243  |
| H                      | 3.415507  | -3.137402 | 3.013530  | C  | 0.289596  | 3.571989  | 3.233023  |
| H                      | 2.857848  | -4.527883 | 2.048420  | H  | -1.381890 | -2.481084 | -0.839217 |
| gal_si_product_solvent |           |           |           | H  | -1.661084 | -1.428149 | 1.365065  |
| C                      | -6.680813 | -0.164307 | 1.111461  | H  | -1.283896 | 1.072445  | -0.289063 |
| C                      | -5.538266 | -0.943619 | 0.925298  | H  | 0.875393  | -2.196451 | -0.605445 |
| C                      | -5.680731 | -2.306307 | 0.661520  | H  | 0.770343  | -0.693310 | -2.578836 |
| C                      | -6.947826 | -2.880109 | 0.587543  | H  | 0.651392  | 0.707513  | -1.492154 |
| C                      | -8.084478 | -2.098819 | 0.781670  | H  | 2.960024  | 1.453147  | -2.230302 |
| C                      | -7.947660 | -0.737482 | 1.045897  | H  | 2.762930  | 0.096599  | -3.366257 |
|                        |           |           |           | H  | 5.186173  | 1.962298  | -1.500263 |

|   |           |           |           |   |          |           |          |
|---|-----------|-----------|-----------|---|----------|-----------|----------|
| H | 7.547083  | 1.300522  | -1.134031 | H | 3.462690 | -2.420872 | 3.455107 |
| H | 8.278238  | -1.016760 | -1.633274 | H | 2.921649 | -3.978095 | 2.778738 |
| H | 6.646594  | -2.660139 | -2.533237 |   |          |           |          |
| H | 4.289620  | -1.983862 | -2.905981 |   |          |           |          |
| H | -2.579667 | -1.110318 | -3.579948 |   |          |           |          |
| H | -3.231970 | -1.827780 | -2.091002 |   |          |           |          |
| H | -5.445087 | -0.856447 | -2.090011 |   |          |           |          |
| H | -6.879057 | 1.135124  | -1.813930 |   |          |           |          |
| H | -5.875322 | 3.410020  | -1.847479 |   |          |           |          |
| H | -3.427223 | 3.666690  | -2.180499 |   |          |           |          |
| H | -1.999240 | 1.659061  | -2.478750 |   |          |           |          |
| H | -3.808622 | -0.354437 | 2.062821  |   |          |           |          |
| H | -4.236022 | 0.746166  | 0.730357  |   |          |           |          |
| H | -6.575063 | 0.902738  | 1.291991  |   |          |           |          |
| H | -8.828669 | -0.119494 | 1.189636  |   |          |           |          |
| H | -9.071480 | -2.546197 | 0.720503  |   |          |           |          |
| H | -7.048080 | -3.940372 | 0.376246  |   |          |           |          |
| H | -4.790225 | -2.904733 | 0.498643  |   |          |           |          |
| H | -2.049322 | 1.173884  | 1.305997  |   |          |           |          |
| H | 0.551747  | 1.344640  | 1.265592  |   |          |           |          |
| H | 2.419338  | 3.987903  | 3.215924  |   |          |           |          |
| H | 2.045245  | 2.291492  | 3.127180  |   |          |           |          |
| H | 2.714116  | 1.644405  | 0.166713  |   |          |           |          |
| H | 3.586939  | 3.083855  | -0.318828 |   |          |           |          |
| H | 5.109823  | 1.581675  | 0.957578  |   |          |           |          |
| H | 4.813452  | 3.007957  | 1.961345  |   |          |           |          |
| H | 3.962073  | 1.488912  | 2.290184  |   |          |           |          |
| H | 0.855470  | 5.281576  | 0.892304  |   |          |           |          |
| H | 1.807657  | 4.798148  | -0.512852 |   |          |           |          |
| H | 0.252113  | 2.839018  | -0.879170 |   |          |           |          |
| H | -0.712801 | 3.351044  | 0.506580  |   |          |           |          |
| H | -0.612429 | 4.378996  | -0.928558 |   |          |           |          |
| H | 0.234815  | 3.656086  | 4.323514  |   |          |           |          |
| H | -0.085969 | 4.510823  | 2.813757  |   |          |           |          |
| H | -0.386672 | 2.764062  | 2.936176  |   |          |           |          |
| C | 3.752922  | -2.618206 | 1.317080  |   |          |           |          |
| C | 4.051098  | -3.711537 | 0.296897  |   |          |           |          |
| C | 4.776156  | -1.492090 | 1.197362  |   |          |           |          |
| C | 3.688104  | -3.199381 | 2.725573  |   |          |           |          |
| H | 5.782276  | -1.922524 | 1.209784  |   |          |           |          |
| H | 4.639076  | -0.967159 | 0.247049  |   |          |           |          |
| H | 4.684550  | -0.777383 | 2.014538  |   |          |           |          |
| H | 5.022869  | -4.165130 | 0.508360  |   |          |           |          |
| H | 3.283426  | -4.489243 | 0.336077  |   |          |           |          |
| H | 4.073993  | -3.284171 | -0.709034 |   |          |           |          |
| H | 4.653360  | -3.648762 | 2.976986  |   |          |           |          |
